# Supplementary material for: Identification of sympatric cryptic species of Aedes albopictus subgroup in Vietnam: new perspectives in phylosymbiosis of insect vector
Source: Springer Nature journal article supplement (doi:10.1186/s13071-017-2202-9), 2017-06-02
Supplement: MOESM1 [file 13071_2017_2202_MOESM1_ESM.pdf]

**Supplementary informations:**

**Identification of sympatric cryptic species of *Aedes albopictus* subgroup in Vietnam: new perspectives in phyllosymbiosis of insect vector**

Extracted from Genebank the 5<sup>th</sup> of May 2016 :

**>gi|340050923|gb|HQ398902.1| *Aedes albopictus* voucher VN103-9 cytochrome oxidase subunit I (COI) gene, partial cds; mitochondrial**

```
AACATTATATTTTATTTTTGGAGTTTGATCGGGAATAGTAGGAACTTCATTAAGAATTTTAATTCGTACAGA
ACTTAGCCACCCAGGAATATTTATTGGAAATGATCAAATTTATAATGTAATTGTTACAGCTCATGCATTTA
TTATAATTTTTTTTATAGTTATACCAATTATAATTGGAGGATTTGGAAATTGATTAGTACCTTTAATATTAG
GAGCCCCTGATATAGCTTTTCCTCGAATAAATAATATAAGTTTCTGAATACTTCCTCCTTCTTTAACACTT
CTTCTTTCTAGTTCTATAGTAGAAAATGGAGCTGGAAGCTGGATGAACTGTTTACCCTCCTCTTTCTTCTG
GAACTGCTCATGCCGGGGCTTCAGTTGATTTAGCAATTTTTCTTTACATTTAGCAGGAATTTCTTCAATT
TTAGGAGCAGTAAATTTTATTACGACTGTAATTAATATACGATCAGCTGGAATTACTCTTGATCGTCTTCC
ATTATTTGTATGATCTGTTGTTATTACAGCTATTTTATTACTTCTATCTTTACCTGTTTTAGCGGGAGCTAT
TACTATATTATTAAGTACCGAAATTTAAATACTTCTTTTTTTGATCCAATTGGAGGAGGAGACCCTATTC
TTTACCAACACTTATTT
```

**>gi|745794145|gb|KM502236.1| *Aedes albopictus* voucher whlpx001 cytochrome c oxidase subunit I (COI) gene, partial cds; mitochondrial**

```
TTTATTTTTGGAGTTTGATCGGGAATAGTAGGAACTTCATTAAGAATTTTAATTCGTACAGAACTTAGCCA
CCCAGGAATATTTATTGGAAATGATCAAATTTATAATGTAATTGTTACAGCTCATGCATTTATTATAATTTT
TTTTATAGTTATACCAATTATAATTGGAGGATTTGGAAATTGATTAGTACCTTTAATATTAGGAGCCCCTG
ATATAGCTTTTCCTCGAATAAATAATATAAGTTTCTGAATACTTCCTCCTTCTTTAACACTTCTTCTTTCTA
GTTCTATAGTAGAAAATGGAGCTGGAAGCTGGATGAACTGTTTACCCTCCTCTTTCTTCTGGAAGCTGCTCA
TGCCGGGGCTTCAGTTGATTTAGCAATTTTTCTTTACATTTAGCAGGAATTTCTTCAATTTTAGGAGCAG
TAAATTTTATTACGACTGTAATTAATATACGATCAGCTGGAATTACTCTTGATCGTCTTCCATTATTTGTAT
GATCTGTTGTTATTACAGCTATTTTATTACTTCTATCTTTACCTGTTTTAGCGGGAGCTATTACTATATTAT
TAACTGACCGAAATTTAAATACTTCTTTTTTTGATCCAAT
```

Both sequences had a 99 % identity score with the Cryptic *Aedes* sp. described in the current publication.

**A.**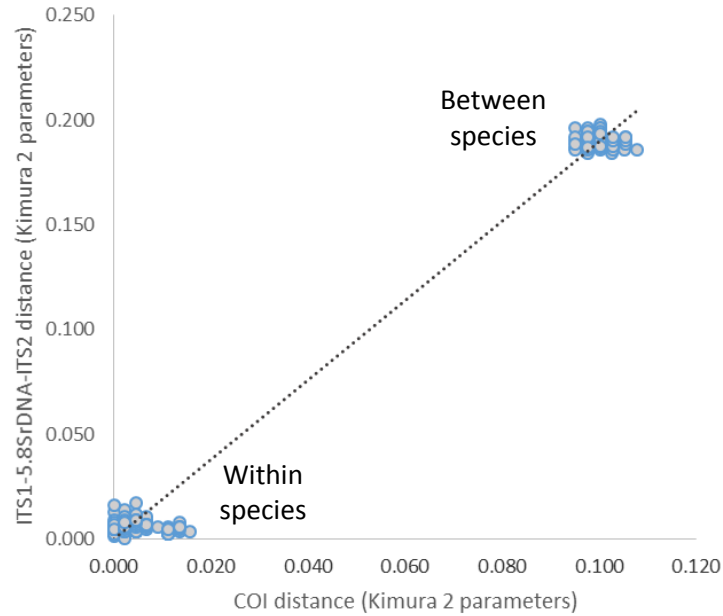**B.**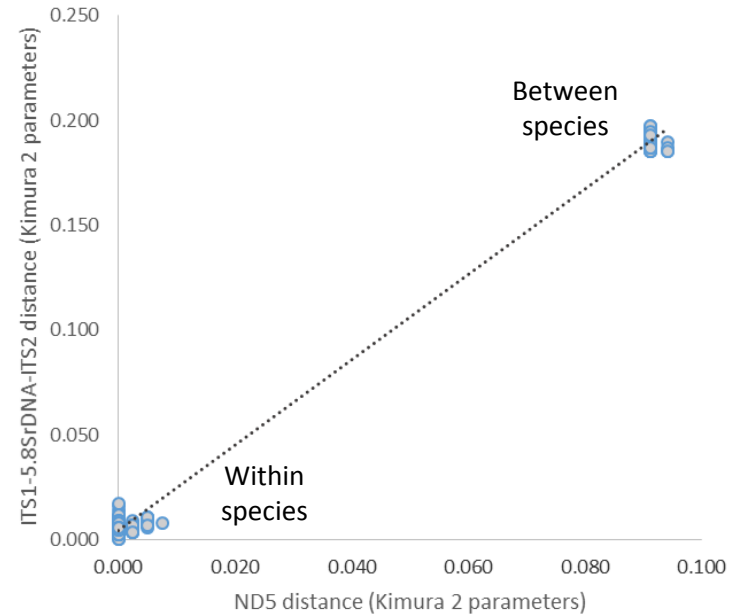**C.**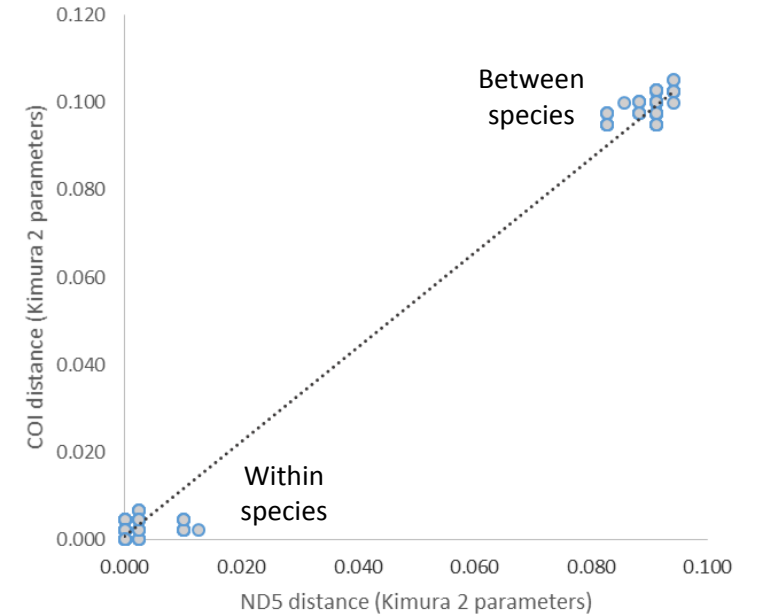

**Figure S1. Correlation of pairwise nucleotidic distances among COI, ND5 and ITS1-5.8SrDNA-ITS2 markers.** The Kimura 2 parameters based distances have been estimated among each pair of samples and plotted for the same samples genotyped with (A) ITS1-5.8SrDNA-ITS2 and COI, (B) ITS1-5.8SrDNA-ITS2 and ND5, (C) COI and ND5. Distances within and among *Aedes albopictus* and the Cryptic *Aedes* sp. species are highlighted.

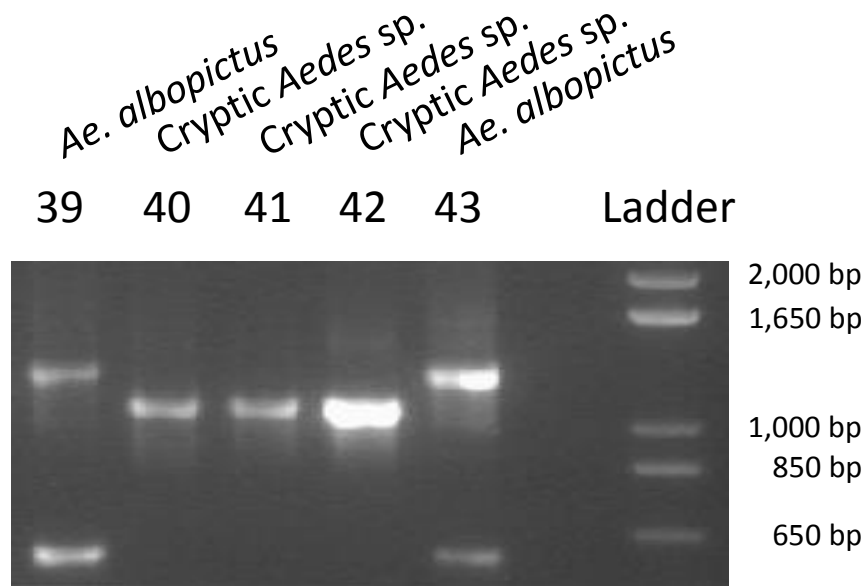

**Figure S2. Molecular features reveal differences between *Ae. albopictus* and a Cryptic *Aedes* species living in sympatry.** ITS1-5.8SrDNA-ITS2 amplicons differs in size between individuals belonging to *Ae. albopictus* (39 and 43) and the cryptic *Aedes* sp. (40,41 and 42). An additional amplicon (< 560bp) of the same region from the symbiotic protist *Ascogregarina taiwanensis* might be visible for *Ae. albopictus* individuals.

Table S1. Analysis of haplotypes and nucleotides diversity within the two *Aedes* groups.

| Marker             | Group | n <sub>individuals</sub> | n <sub>haplotypes</sub> | S* | Hd** | π*** |        |
|--------------------|-------|--------------------------|-------------------------|----|------|------|--------|
| COI                | A     | 20                       | 9                       | 9  | 9    | 0.70 | 0.0018 |
|                    | C     | 28                       | 12                      | 12 | 16   | 0.74 | 0.0028 |
| ND5                | A     | 19                       | 3                       | 3  | 5    | 0.20 | 0.0012 |
|                    | C     | 25                       | 4                       | 4  | 4    | 0.23 | 0.0007 |
| ITS1-5.8SrDNA-ITS2 | A     | 5                        | 5                       | 5  | 1085 | 1    | 0.68   |
|                    | C     | 20                       | 20                      | 20 | 1141 | 1    | 0.63   |

\*Number of segregating sites

\*\* Haplotype diversity

\*\*\*Nucleotide diversity

TableS2. Proportions of Operational Taxonomic Units (OTU) identified in midgut samles

| Taxonomy (Bootstrap)  | OTU       | BGM1                 | BGM3                 | BGM4                 | BGM5                | BGM6                 |
|-----------------------|-----------|----------------------|----------------------|----------------------|---------------------|----------------------|
| Dysgonomonas(100)     | Otu000001 | 0.0227325807707279   | 0.648712821794551    | 0.401287085514834    | 0.601298214954438   | 0.402693454023623    |
| Asaia(91)             | Otu000003 | 0                    | 0                    | 0.000218150087260035 | 0                   | 0.00231813665967546  |
| Aeromonas(100)        | Otu000005 | 0                    | 0                    | 0                    | 0.0515541130944951  | 0                    |
| Novosphingobium(97)   | Otu000012 | 0.241027637212923    | 0.018495376155961    | 0.0591186736474695   | 0.0195980526775683  | 0.0260514405563528   |
| Aquabacterium(90)     | Otu000013 | 0.002958349552355    | 0.00174956260934766  | 0.00512652705061082  | 0.00074897016602172 | 0.00452588585936638  |
| Caulobacter(67)       | Otu000014 | 0.227092253795251    | 0.0212446888277931   | 0.0407940663176265   | 0.0103607539633005  | 0.0152334694778673   |
| Dysgonomonas(100)     | Otu000017 | 0.000155702608018684 | 0.00487378155461135  | 0.00218150087260035  | 0.00237173885906878 | 0.00430511093939728  |
| Methylobacterium(100) | Otu000021 | 0.0741144414168937   | 0                    | 0.0349040139616056   | 0                   | 0                    |
| Acinetobacter(100)    | Otu000023 | 0                    | 0.00362409397650587  | 0                    | 0                   | 0.000110387459984546 |
| Hydrotalea(100)       | Otu000024 | 0.0653172440638381   | 0.00424893776555861  | 0.00992582897033159  | 0.0037448508301086  | 0.00684402251904184  |
| Asaia(83)             | Otu000030 | 0                    | 0                    | 0                    | 0                   | 0.000110387459984546 |
| unclassified(100)     | Otu000033 | 0                    | 0                    | 0.000109075043630017 | 0                   | 0                    |
| unclassified(63)      | Otu000034 | 0.0180615025301674   | 0                    | 0.00861692844677138  | 0                   | 0                    |
| Sphingomonas(100)     | Otu000039 | 0.0434410276372129   | 0.00787303174206448  | 0.0282504363001745   | 0.0104855823243041  | 0.00872060933877911  |
| Dysgonomonas(100)     | Otu000041 | 0                    | 0.000624843789052737 | 0.000545375218150087 | 0.00049931344401448 | 0.000331162379953637 |
| Pseudomonas(97)       | Otu000043 | 0                    | 0.000874781304673832 | 0                    | 0.00024965672200724 | 0.000551937299922729 |
| Sphingobium(94)       | Otu000044 | 0.0319968859478396   | 0.00374906273431642  | 0.0280322862129145   | 0.0104855823243041  | 0.0139088199580528   |
| Enterococcus(90)      | Otu000045 | 0                    | 0.000749812546863284 | 0.000218150087260035 | 0.00012482836100362 | 0                    |
| Leuconostoc(100)      | Otu000046 | 0.000155702608018684 | 0                    | 0.0018542757417103   | 0.00536761952315566 | 0                    |
| Dysgonomonas(100)     | Otu000047 | 0                    | 0.000749812546863284 | 0.00043630017452007  | 0.00074897016602172 | 0.000551937299922729 |
| Dysgonomonas(100)     | Otu000048 | 0.000155702608018684 | 0.00149962509372657  | 0.000545375218150087 | 0.00024965672200724 | 0.000441549839938183 |
| unclassified(53)      | Otu000050 | 0.0190735694822888   | 0.0108722819295176   | 0.0566099476439791   | 0                   | 0.0466938955734629   |
| Ralstonia(75)         | Otu000051 | 0.000934215648112106 | 0.000124968757810547 | 0.000763525305410122 | 0.00112345524903258 | 0.000441549839938183 |
| Aeromonas(100)        | Otu000054 | 0                    | 0.000249937515621095 | 0.000327225130890052 | 0.00024965672200724 | 0.000331162379953637 |
| Brevundimonas(96)     | Otu000055 | 0.00264694433631763  | 0.00287428142964259  | 0.00261780104712042  | 0.0087379852702534  | 0.00353239871950546  |
| Ewingella(63)         | Otu000056 | 0                    | 0.00399900024993752  | 0.00479930191972077  | 0.00262139558107602 | 0.00353239871950546  |
| unclassified(100)     | Otu000060 | 0.000467107824056053 | 0.000249937515621095 | 0.000109075043630017 | 0.00037448508301086 | 0.000110387459984546 |
| Asaia(72)             | Otu000061 | 0                    | 0                    | 0.000109075043630017 | 0                   | 0                    |
| Novosphingobium(100)  | Otu000062 | 0.00186843129622421  | 0.000249937515621095 | 0.000654450261780105 | 0.00049931344401448 | 0.000110387459984546 |
| Methylobacterium(100) | Otu000063 | 0.0242117555469054   | 0                    | 0.0145069808027923   | 0                   | 0                    |
| unclassified(85)      | Otu000065 | 0                    | 0.0044988752811797   | 0.00327225130890052  | 0.00411933591311946 | 0.00121426205983     |

|                       |           |                       |                      |                      |                     |                      |
|-----------------------|-----------|-----------------------|----------------------|----------------------|---------------------|----------------------|
| unclassified(100)     | Otu000066 | 0.000544959128065395  | 0                    | 0.000109075043630017 | 0                   | 0                    |
| Pseudomonas(89)       | Otu000067 | 0                     | 0                    | 0                    | 0.00012482836100362 | 0.000110387459984546 |
| Cellvibrio(94)        | Otu000068 | 0                     | 0.00399900024993752  | 0                    | 0.0106104106853077  | 0                    |
| Novosphingobium(100)  | Otu000069 | 0.00108991825613079   | 0                    | 0.000654450261780105 | 0.00012482836100362 | 0.000220774919969092 |
| Aeromonas(100)        | Otu000070 | 0.0000778513040093422 | 0                    | 0.000109075043630017 | 0.00012482836100362 | 0.000220774919969092 |
| unclassified(99)      | Otu000073 | 0.000934215648112106  | 0                    | 0                    | 0.00224691049806516 | 0                    |
| Gluconobacter(99)     | Otu000076 | 0                     | 0                    | 0                    | 0                   | 0.151451595098797    |
| unclassified(86)      | Otu000077 | 0.000934215648112106  | 0                    | 0.000545375218150087 | 0                   | 0                    |
| Novosphingobium(89)   | Otu000079 | 0.00124562086414947   | 0.000124968757810547 | 0.000327225130890052 | 0.00012482836100362 | 0.000220774919969092 |
| unclassified(98)      | Otu000080 | 0                     | 0.000249937515621095 | 0.000218150087260035 | 0.00024965672200724 | 0.000110387459984546 |
| Streptococcus(100)    | Otu000083 | 0                     | 0                    | 0.0025087260034904   | 0.00287105230308326 | 0.00220774919969092  |
| Novosphingobium(92)   | Otu000085 | 0.00132347216815882   | 0.000124968757810547 | 0.000327225130890052 | 0                   | 0.000220774919969092 |
| Rhizobacter(90)       | Otu000086 | 0                     | 0                    | 0.000981675392670157 | 0                   | 0.00132464951981455  |
| unclassified(95)      | Otu000093 | 0                     | 0                    | 0.00087260034904014  | 0.00012482836100362 | 0.000551937299922729 |
| Rhizobium(100)        | Otu000094 | 0.0128454651615415    | 0.00487378155461135  | 0.00610820244328098  | 0.00099862688802896 | 0.00640247267910365  |
| Lacibacter(100)       | Otu000097 | 0                     | 0                    | 0.0471204188481675   | 0                   | 0.0205320675571255   |
| Tepidimonas(98)       | Otu000098 | 0                     | 0                    | 0                    | 0.00012482836100362 | 0.000110387459984546 |
| Aquabacterium(64)     | Otu000099 | 0.000155702608018684  | 0                    | 0.000327225130890052 | 0                   | 0.000220774919969092 |
| unclassified(86)      | Otu000102 | 0.0000778513040093422 | 0                    | 0.000545375218150087 | 0.00574210460616652 | 0.000110387459984546 |
| Chryseobacterium(100) | Otu000103 | 0                     | 0                    | 0.000109075043630017 | 0                   | 0                    |
| Streptococcus(100)    | Otu000104 | 0                     | 0.00149962509372657  | 0.000109075043630017 | 0.00424416427412308 | 0                    |
| Sphingobium(100)      | Otu000105 | 0.000389256520046711  | 0.000124968757810547 | 0.000327225130890052 | 0.00049931344401448 | 0.000110387459984546 |
| Afipia(99)            | Otu000109 | 0.00957571039314909   | 0.00374906273431642  | 0.00469022687609075  | 0                   | 0.00154542443978364  |
| Caedibacter(100)      | Otu000111 | 0.0137018295056442    | 0.000124968757810547 | 0.00294502617801047  | 0                   | 0.000662324759907275 |
| unclassified(77)      | Otu000112 | 0.000233553912028026  | 0                    | 0.00043630017452007  | 0.00024965672200724 | 0.000551937299922729 |
| unclassified(98)      | Otu000113 | 0                     | 0.00137465633591602  | 0.000109075043630017 | 0.00024965672200724 | 0                    |
| Enhydrobacter(100)    | Otu000117 | 0                     | 0.00149962509372657  | 0                    | 0                   | 0                    |
| Hydrotalea(100)       | Otu000118 | 0.000544959128065395  | 0                    | 0.000109075043630017 | 0                   | 0                    |
| Cloacibacterium(85)   | Otu000119 | 0.0000778513040093422 | 0.00262434391402149  | 0.00152705061082024  | 0                   | 0.000993487139860912 |
| unclassified(100)     | Otu000120 | 0                     | 0                    | 0                    | 0.00024965672200724 | 0.000110387459984546 |
| Streptococcus(100)    | Otu000121 | 0.0000778513040093422 | 0                    | 0.00087260034904014  | 0.00449382099613032 | 0                    |
| unclassified(100)     | Otu000123 | 0                     | 0.000624843789052737 | 0                    | 0.0074897016602172  | 0                    |
| Pseudomonas(94)       | Otu000125 | 0                     | 0.00512371907023244  | 0.00272687609075044  | 0.00386967919111222 | 0.00485704823932001  |

|                       |           |                       |                      |                      |                     |                      |
|-----------------------|-----------|-----------------------|----------------------|----------------------|---------------------|----------------------|
| unclassified(55)      | Otu000132 | 0.0000778513040093422 | 0.000374906273431642 | 0.000109075043630017 | 0.00024965672200724 | 0                    |
| Aquabacterium(93)     | Otu000133 | 0.0000778513040093422 | 0                    | 0.000654450261780105 | 0                   | 0.000331162379953637 |
| Staphylococcus(100)   | Otu000134 | 0                     | 0.000249937515621095 | 0                    | 0                   | 0.000110387459984546 |
| unclassified          | Otu000135 | 0.000233553912028026  | 0.000499875031242189 | 0.00109075043630017  | 0.0006241418050181  | 0                    |
| Dysgonomonas(100)     | Otu000136 | 0.0000778513040093422 | 0.000624843789052737 | 0.00043630017452007  | 0.00024965672200724 | 0.00242852411966001  |
| Dysgonomonas(100)     | Otu000137 | 0                     | 0                    | 0.000109075043630017 | 0.00012482836100362 | 0                    |
| Aquabacterium(77)     | Otu000139 | 0.000155702608018684  | 0                    | 0.000545375218150087 | 0.00012482836100362 | 0.000110387459984546 |
| unclassified(97)      | Otu000140 | 0                     | 0.00174956260934766  | 0.000654450261780105 | 0.00112345524903258 | 0.000993487139860912 |
| Chryseobacterium(100) | Otu000141 | 0                     | 0.00349912521869533  | 0.00174520069808028  | 0.00037448508301086 | 0.000331162379953637 |
| Dysgonomonas(100)     | Otu000143 | 0                     | 0.000249937515621095 | 0.000109075043630017 | 0.00012482836100362 | 0                    |
| Dysgonomonas(100)     | Otu000144 | 0.000155702608018684  | 0.0023744063984004   | 0.000327225130890052 | 0.00349519410810136 | 0.00077271221989182  |
| Novosphingobium(84)   | Otu000145 | 0.000934215648112106  | 0                    | 0.000218150087260035 | 0                   | 0.000220774919969092 |
| unclassified(99)      | Otu000146 | 0                     | 0.000124968757810547 | 0                    | 0                   | 0.000110387459984546 |
| Finegoldia(100)       | Otu000148 | 0                     | 0.00362409397650587  | 0                    | 0                   | 0                    |
| unclassified(58)      | Otu000150 | 0.000467107824056053  | 0.000249937515621095 | 0.000218150087260035 | 0.00024965672200724 | 0.000441549839938183 |
| Bacillus(100)         | Otu000151 | 0                     | 0                    | 0                    | 0.00024965672200724 | 0                    |
| Flavobacterium(100)   | Otu000153 | 0                     | 0.000124968757810547 | 0.000109075043630017 | 0                   | 0                    |
| Caulobacter(79)       | Otu000154 | 0.000856364344102764  | 0                    | 0                    | 0.00012482836100362 | 0                    |
| unclassified(88)      | Otu000156 | 0.00179057999221487   | 0                    | 0.000327225130890052 | 0.00024965672200724 | 0.000110387459984546 |
| Myroides(99)          | Otu000157 | 0                     | 0.00124968757810547  | 0.000763525305410122 | 0.00224691049806516 | 0                    |
| Chryseobacterium(99)  | Otu000160 | 0                     | 0.000124968757810547 | 0                    | 0                   | 0.000220774919969092 |
| unclassified(100)     | Otu000161 | 0                     | 0                    | 0.000654450261780105 | 0                   | 0.000220774919969092 |
| Paracoccus(100)       | Otu000163 | 0.000389256520046711  | 0.00512371907023244  | 0.00141797556719023  | 0.0107352390463113  | 0.00430511093939728  |
| unclassified(73)      | Otu000164 | 0                     | 0.000124968757810547 | 0                    | 0.00012482836100362 | 0                    |
| unclassified(100)     | Otu000165 | 0.000155702608018684  | 0                    | 0                    | 0                   | 0                    |
| Dysgonomonas(100)     | Otu000166 | 0                     | 0                    | 0.000109075043630017 | 0.00012482836100362 | 0.000331162379953637 |
| Chryseobacterium(100) | Otu000167 | 0                     | 0.00112471882029493  | 0                    | 0.00074897016602172 | 0                    |
| unclassified(100)     | Otu000168 | 0.000311405216037369  | 0                    | 0                    | 0                   | 0                    |
| Staphylococcus(100)   | Otu000169 | 0                     | 0.00312421894526368  | 0                    | 0.0024965672200724  | 0                    |
| Lacibacter(100)       | Otu000170 | 0                     | 0.000124968757810547 | 0.000545375218150087 | 0                   | 0.000220774919969092 |
| unclassified(98)      | Otu000171 | 0                     | 0.000124968757810547 | 0                    | 0.00012482836100362 | 0                    |
| unclassified(63)      | Otu000172 | 0.0000778513040093422 | 0                    | 0.000218150087260035 | 0                   | 0.000110387459984546 |
| Chryseobacterium(86)  | Otu000174 | 0                     | 0                    | 0.00163612565445026  | 0                   | 0                    |



|                                 |           |                       |                      |                      |                     |                      |
|---------------------------------|-----------|-----------------------|----------------------|----------------------|---------------------|----------------------|
| Staphylococcus(100)             | Otu000175 | 0                     | 0.000124968757810547 | 0                    | 0.00012482836100362 | 0                    |
| Streptococcus(100)              | Otu000176 | 0                     | 0                    | 0                    | 0                   | 0.000110387459984546 |
| Rhizobiales_bacterium_NHI-8(64) | Otu000177 | 0.00217983651226158   | 0.00299925018745314  | 0.00567190226876091  | 0                   | 0.00463627331935092  |
| unclassified(100)               | Otu000180 | 0                     | 0.000124968757810547 | 0                    | 0                   | 0                    |
| unclassified(100)               | Otu000181 | 0                     | 0.00574856285928518  | 0.0232329842931937   | 0.00049931344401448 | 0.0120322331383155   |
| Pseudomonas(100)                | Otu000185 | 0                     | 0.000249937515621095 | 0                    | 0                   | 0                    |
| Lacibacter(100)                 | Otu000187 | 0                     | 0.000249937515621095 | 0.000654450261780105 | 0                   | 0.000441549839938183 |
| Methylobacterium(100)           | Otu000189 | 0.00210198520825224   | 0                    | 0                    | 0.00049931344401448 | 0.00342201125952092  |
| unclassified(100)               | Otu000190 | 0                     | 0.000249937515621095 | 0.000109075043630017 | 0                   | 0                    |
| Chryseobacterium(100)           | Otu000193 | 0.0000778513040093422 | 0.000374906273431642 | 0.000109075043630017 | 0                   | 0                    |
| Pantoea(55)                     | Otu000195 | 0                     | 0                    | 0                    | 0.00049931344401448 | 0                    |
| Bacillus(100)                   | Otu000197 | 0                     | 0                    | 0                    | 0.00012482836100362 | 0                    |
| Aquabacterium(74)               | Otu000200 | 0                     | 0                    | 0.000218150087260035 | 0                   | 0.000110387459984546 |
| Dysgonomonas(100)               | Otu000201 | 0                     | 0                    | 0                    | 0                   | 0.000220774919969092 |
| unclassified(100)               | Otu000202 | 0                     | 0                    | 0.000109075043630017 | 0                   | 0                    |
| unclassified(53)                | Otu000203 | 0.00264694433631763   | 0.000624843789052737 | 0.00207242582897033  | 0.00037448508301086 | 0.00176619935975273  |
| unclassified(60)                | Otu000205 | 0.0014791747761775    | 0                    | 0                    | 0.0006241418050181  | 0                    |
| Anaerococcus(100)               | Otu000208 | 0.000389256520046711  | 0.000499875031242189 | 0                    | 0.00948695543627512 | 0                    |
| Chryseobacterium(100)           | Otu000209 | 0                     | 0                    | 0.000109075043630017 | 0                   | 0                    |
| unclassified(99)                | Otu000210 | 0.0000778513040093422 | 0                    | 0                    | 0                   | 0                    |
| Anaerococcus(100)               | Otu000212 | 0                     | 0                    | 0                    | 0.00049931344401448 | 0                    |
| unclassified(69)                | Otu000213 | 0.0000778513040093422 | 0                    | 0                    | 0                   | 0                    |
| Gluconobacter(93)               | Otu000215 | 0                     | 0                    | 0                    | 0                   | 0.0259410530963683   |
| Sphingobium(98)                 | Otu000221 | 0.000622810432074737  | 0                    | 0.000218150087260035 | 0.00024965672200724 | 0.000110387459984546 |
| unclassified(100)               | Otu000222 | 0                     | 0                    | 0                    | 0.00012482836100362 | 0.000110387459984546 |
| Haemophilus(100)                | Otu000223 | 0.000155702608018684  | 0.000499875031242189 | 0.00087260034904014  | 0.0012482836100362  | 0.00077271221989182  |
| unclassified(100)               | Otu000224 | 0                     | 0                    | 0.000109075043630017 | 0                   | 0                    |
| unclassified(100)               | Otu000225 | 0                     | 0                    | 0                    | 0.00137311197103982 | 0                    |
| Dysgonomonas(100)               | Otu000226 | 0                     | 0                    | 0.000109075043630017 | 0                   | 0                    |
| Escherichia-Shigella(83)        | Otu000227 | 0.0000778513040093422 | 0                    | 0                    | 0                   | 0                    |
| unclassified(89)                | Otu000228 | 0.000155702608018684  | 0                    | 0                    | 0                   | 0.000331162379953637 |
| Dysgonomonas(100)               | Otu000230 | 0                     | 0                    | 0                    | 0                   | 0.000110387459984546 |
| Flectobacillus(100)             | Otu000232 | 0.0000778513040093422 | 0                    | 0.00119982547993019  | 0.00087379852702534 | 0.00110387459984546  |

|                        |           |                       |                      |                      |                     |                      |
|------------------------|-----------|-----------------------|----------------------|----------------------|---------------------|----------------------|
| Flavobacterium(100)    | Otu000233 | 0                     | 0                    | 0                    | 0.00024965672200724 | 0                    |
| unclassified(100)      | Otu000236 | 0.000155702608018684  | 0                    | 0                    | 0.00012482836100362 | 0.000110387459984546 |
| Sphingobium(98)        | Otu000241 | 0.000155702608018684  | 0                    | 0.000218150087260035 | 0                   | 0.000110387459984546 |
| Sphingopyxis(88)       | Otu000242 | 0                     | 0                    | 0.000109075043630017 | 0                   | 0                    |
| unclassified(100)      | Otu000245 | 0                     | 0.000124968757810547 | 0                    | 0                   | 0.000110387459984546 |
| unclassified(100)      | Otu000246 | 0.0424289606850915    | 0.00374906273431642  | 0.00818062827225131  | 0.0024965672200724  | 0.000993487139860912 |
| Aquabacterium(83)      | Otu000247 | 0.000155702608018684  | 0                    | 0.000218150087260035 | 0                   | 0.000110387459984546 |
| Spirosoma(100)         | Otu000248 | 0.0219540677306345    | 0                    | 0.000763525305410122 | 0.00037448508301086 | 0                    |
| Sphingomonas(100)      | Otu000249 | 0                     | 0.000374906273431642 | 0                    | 0                   | 0                    |
| unclassified(100)      | Otu000251 | 0.000233553912028026  | 0                    | 0.000218150087260035 | 0                   | 0.000220774919969092 |
| unclassified(95)       | Otu000252 | 0.0000778513040093422 | 0                    | 0.000654450261780105 | 0                   | 0.000110387459984546 |
| Pelomonas(77)          | Otu000253 | 0.0000778513040093422 | 0                    | 0.000109075043630017 | 0                   | 0                    |
| Ralstonia(62)          | Otu000257 | 0.000155702608018684  | 0.000124968757810547 | 0                    | 0.00012482836100362 | 0.000110387459984546 |
| unclassified(100)      | Otu000258 | 0                     | 0.000124968757810547 | 0                    | 0                   | 0                    |
| unclassified(100)      | Otu000259 | 0                     | 0                    | 0                    | 0.00012482836100362 | 0                    |
| Paracoccus(98)         | Otu000261 | 0.000233553912028026  | 0                    | 0                    | 0.00137311197103982 | 0                    |
| Chryseobacterium(100)  | Otu000262 | 0                     | 0.000124968757810547 | 0                    | 0.0012482836100362  | 0.000110387459984546 |
| Flavobacterium(93)     | Otu000263 | 0.000155702608018684  | 0.00324918770307423  | 0                    | 0.0006241418050181  | 0                    |
| unclassified(95)       | Otu000264 | 0                     | 0.00112471882029493  | 0                    | 0                   | 0                    |
| Neochlamydia(100)      | Otu000265 | 0.00428182172051382   | 0.00124968757810547  | 0.000109075043630017 | 0                   | 0                    |
| Pseudochrobactrum(100) | Otu000266 | 0.000155702608018684  | 0.000499875031242189 | 0                    | 0                   | 0                    |
| Flexibacter(93)        | Otu000268 | 0.000155702608018684  | 0.00162459385153712  | 0.00130890052356021  | 0                   | 0.00474666077933547  |
| Acidocella(100)        | Otu000270 | 0.0000778513040093422 | 0                    | 0                    | 0.00037448508301086 | 0                    |
| Streptococcus(100)     | Otu000272 | 0.0000778513040093422 | 0                    | 0                    | 0                   | 0                    |
| Brevundimonas(100)     | Otu000273 | 0.0000778513040093422 | 0.00137465633591602  | 0.00174520069808028  | 0                   | 0                    |
| Alkanindiges(100)      | Otu000274 | 0                     | 0                    | 0                    | 0.00012482836100362 | 0                    |
| Dolosigranulum(100)    | Otu000275 | 0                     | 0.00137465633591602  | 0.000327225130890052 | 0                   | 0                    |
| Legionella(100)        | Otu000276 | 0.00101206695212145   | 0                    | 0                    | 0.00212208213706154 | 0.000551937299922729 |
| unclassified(87)       | Otu000277 | 0                     | 0                    | 0.000218150087260035 | 0                   | 0                    |
| Reyranella(100)        | Otu000278 | 0.000155702608018684  | 0.000249937515621095 | 0.00479930191972077  | 0                   | 0.000441549839938183 |
| Bosea(100)             | Otu000279 | 0.000233553912028026  | 0.000874781304673832 | 0.000654450261780105 | 0.00037448508301086 | 0.00198697427972182  |
| Dysgonomonas(84)       | Otu000281 | 0                     | 0                    | 0.00305410122164049  | 0.00087379852702534 | 0.000551937299922729 |
| Methylobacterium(100)  | Otu000283 | 0.0000778513040093422 | 0                    | 0                    | 0                   | 0.000331162379953637 |

|                       |           |                       |                      |                      |                     |                      |
|-----------------------|-----------|-----------------------|----------------------|----------------------|---------------------|----------------------|
| Pseudochrobactrum(98) | Otu000284 | 0                     | 0.000124968757810547 | 0.00152705061082024  | 0                   | 0                    |
| Pseudomonas(100)      | Otu000285 | 0                     | 0                    | 0                    | 0.00012482836100362 | 0.000110387459984546 |
| unclassified(75)      | Otu000286 | 0                     | 0                    | 0.000109075043630017 | 0                   | 0                    |
| unclassified(86)      | Otu000291 | 0.0000778513040093422 | 0                    | 0.000218150087260035 | 0                   | 0                    |
| unclassified(98)      | Otu000293 | 0                     | 0                    | 0.000545375218150087 | 0                   | 0.000110387459984546 |
| Chryseobacterium(100) | Otu000294 | 0                     | 0.000249937515621095 | 0                    | 0                   | 0                    |
| unclassified(52)      | Otu000296 | 0                     | 0                    | 0.000218150087260035 | 0.00012482836100362 | 0.000110387459984546 |
| Aquabacterium(86)     | Otu000298 | 0                     | 0                    | 0.000109075043630017 | 0.00012482836100362 | 0                    |
| Paracoccus(95)        | Otu000300 | 0                     | 0                    | 0                    | 0.00024965672200724 | 0                    |
| Aerococcus(100)       | Otu000301 | 0.000155702608018684  | 0.00374906273431642  | 0                    | 0.00149794033204344 | 0.00077271221989182  |
| Hymenobacter(100)     | Otu000302 | 0                     | 0.0044988752811797   | 0                    | 0.00349519410810136 | 0                    |
| Enterococcus(100)     | Otu000303 | 0                     | 0                    | 0                    | 0                   | 0.000110387459984546 |
| Aquabacterium(83)     | Otu000304 | 0                     | 0.000249937515621095 | 0.000218150087260035 | 0                   | 0.000110387459984546 |
| Hymenobacter(100)     | Otu000305 | 0.000233553912028026  | 0.00299925018745314  | 0.00109075043630017  | 0.00711521657720634 | 0.00154542443978364  |
| unclassified(100)     | Otu000308 | 0                     | 0                    | 0                    | 0.00012482836100362 | 0                    |
| Prevotella(100)       | Otu000312 | 0                     | 0                    | 0                    | 0                   | 0.000110387459984546 |
| Novosphingobium(100)  | Otu000314 | 0.000233553912028026  | 0                    | 0.000218150087260035 | 0                   | 0                    |
| unclassified(100)     | Otu000315 | 0                     | 0                    | 0                    | 0.00012482836100362 | 0.000110387459984546 |
| Chryseobacterium(100) | Otu000317 | 0                     | 0.0021244688827793   | 0                    | 0.00037448508301086 | 0                    |
| Bradyrhizobium(100)   | Otu000318 | 0                     | 0                    | 0                    | 0.00149794033204344 | 0.00209736173970637  |
| Aquabacterium(85)     | Otu000321 | 0.0000778513040093422 | 0                    | 0                    | 0                   | 0                    |
| unclassified(100)     | Otu000322 | 0                     | 0                    | 0.000218150087260035 | 0                   | 0                    |
| Aquabacterium(91)     | Otu000323 | 0                     | 0                    | 0.000109075043630017 | 0                   | 0.000110387459984546 |
| Rheinheimera(100)     | Otu000327 | 0.000155702608018684  | 0                    | 0.000327225130890052 | 0.00349519410810136 | 0                    |
| Legionella(97)        | Otu000329 | 0                     | 0.00324918770307423  | 0                    | 0.00012482836100362 | 0.000441549839938183 |
| Aquabacterium(91)     | Otu000333 | 0                     | 0                    | 0.000218150087260035 | 0                   | 0                    |
| Rubellimicrobium(100) | Otu000335 | 0                     | 0                    | 0                    | 0.0012482836100362  | 0.0038635610994591   |
| Paracoccus(100)       | Otu000336 | 0                     | 0                    | 0                    | 0.00137311197103982 | 0                    |
| Gemella(100)          | Otu000337 | 0                     | 0                    | 0.000109075043630017 | 0.00012482836100362 | 0                    |
| Hymenobacter(100)     | Otu000341 | 0                     | 0                    | 0                    | 0                   | 0.00231813665967546  |
| Hyphomicrobium(100)   | Otu000344 | 0                     | 0.00199950012496876  | 0.00272687609075044  | 0                   | 0                    |
| unclassified(87)      | Otu000345 | 0.000155702608018684  | 0                    | 0.000109075043630017 | 0                   | 0.000110387459984546 |
| unclassified(97)      | Otu000348 | 0                     | 0                    | 0                    | 0.00012482836100362 | 0                    |

|                       |           |                      |                      |                      |                     |                      |
|-----------------------|-----------|----------------------|----------------------|----------------------|---------------------|----------------------|
| Sphingomonas(100)     | Otu000349 | 0                    | 0                    | 0                    | 0.00024965672200724 | 0                    |
| Pseudomonas(100)      | Otu000352 | 0                    | 0                    | 0                    | 0                   | 0.000110387459984546 |
| unclassified(59)      | Otu000353 | 0                    | 0.000374906273431642 | 0                    | 0                   | 0                    |
| unclassified(86)      | Otu000358 | 0                    | 0.00299925018745314  | 0                    | 0                   | 0                    |
| Pseudomonas(97)       | Otu000361 | 0                    | 0                    | 0                    | 0                   | 0.000110387459984546 |
| Pseudomonas(90)       | Otu000362 | 0                    | 0.000124968757810547 | 0                    | 0                   | 0                    |
| Chryseobacterium(83)  | Otu000363 | 0                    | 0                    | 0                    | 0                   | 0.00143503697979909  |
| Neisseria(97)         | Otu000365 | 0                    | 0                    | 0.000109075043630017 | 0                   | 0                    |
| Chryseobacterium(79)  | Otu000367 | 0                    | 0.000124968757810547 | 0                    | 0                   | 0                    |
| unclassified(100)     | Otu000368 | 0                    | 0                    | 0.000109075043630017 | 0                   | 0                    |
| Rhizobium(97)         | Otu000370 | 0                    | 0.000999750062484379 | 0                    | 0                   | 0                    |
| unclassified(100)     | Otu000371 | 0                    | 0                    | 0                    | 0.00012482836100362 | 0                    |
| unclassified(97)      | Otu000376 | 0                    | 0                    | 0                    | 0.00012482836100362 | 0                    |
| unclassified(100)     | Otu000378 | 0                    | 0                    | 0                    | 0.00012482836100362 | 0.000110387459984546 |
| Novosphingobium(67)   | Otu000379 | 0.00373686259244842  | 0                    | 0.000327225130890052 | 0                   | 0.000110387459984546 |
| Sphingobium(100)      | Otu000381 | 0                    | 0                    | 0                    | 0.00037448508301086 | 0                    |
| Mesorhizobium(62)     | Otu000382 | 0.000233553912028026 | 0                    | 0.00087260034904014  | 0.0006241418050181  | 0                    |
| Cellvibrio(100)       | Otu000387 | 0                    | 0.000124968757810547 | 0                    | 0                   | 0                    |
| unclassified(66)      | Otu000388 | 0                    | 0                    | 0                    | 0.00012482836100362 | 0                    |
| Pedobacter(97)        | Otu000390 | 0                    | 0                    | 0.0018542757417103   | 0                   | 0                    |
| Aeromonas(100)        | Otu000393 | 0                    | 0.000124968757810547 | 0                    | 0.00012482836100362 | 0                    |
| Sphingomonas(100)     | Otu000394 | 0                    | 0                    | 0.000218150087260035 | 0                   | 0                    |
| SM1A02(100)           | Otu000395 | 0                    | 0.000124968757810547 | 0.000218150087260035 | 0                   | 0                    |
| Dysgonomonas(100)     | Otu000396 | 0                    | 0                    | 0                    | 0.00012482836100362 | 0                    |
| unclassified(76)      | Otu000400 | 0                    | 0.000624843789052737 | 0.000981675392670157 | 0                   | 0.000331162379953637 |
| Pseudomonas(100)      | Otu000404 | 0                    | 0                    | 0                    | 0                   | 0.000110387459984546 |
| unclassified(100)     | Otu000406 | 0                    | 0                    | 0                    | 0                   | 0.000110387459984546 |
| Novosphingobium(100)  | Otu000407 | 0.000233553912028026 | 0                    | 0                    | 0                   | 0                    |
| Methylobacterium(100) | Otu000410 | 0                    | 0                    | 0                    | 0.00012482836100362 | 0                    |
| Streptococcus(100)    | Otu000411 | 0                    | 0                    | 0                    | 0.00037448508301086 | 0.000662324759907275 |
| Rhizobium(100)        | Otu000419 | 0                    | 0                    | 0                    | 0.00012482836100362 | 0                    |
| Dysgonomonas(100)     | Otu000421 | 0                    | 0                    | 0                    | 0.00012482836100362 | 0.000110387459984546 |
| Novosphingobium(88)   | Otu000423 | 0.000233553912028026 | 0                    | 0                    | 0                   | 0                    |

|                       |           |                       |                      |                      |                     |                      |
|-----------------------|-----------|-----------------------|----------------------|----------------------|---------------------|----------------------|
| unclassified(100)     | Otu000426 | 0                     | 0                    | 0.000109075043630017 | 0                   | 0                    |
| Aquabacterium(74)     | Otu000429 | 0                     | 0                    | 0.000109075043630017 | 0                   | 0                    |
| unclassified(66)      | Otu000431 | 0.0000778513040093422 | 0                    | 0.00523560209424084  | 0.00012482836100362 | 0.00231813665967546  |
| Asticcacaulis(61)     | Otu000432 | 0                     | 0                    | 0.00109075043630017  | 0.00087379852702534 | 0.000331162379953637 |
| unclassified(100)     | Otu000434 | 0.0000778513040093422 | 0                    | 0                    | 0                   | 0                    |
| Sphingobium(73)       | Otu000441 | 0.00490463215258856   | 0                    | 0.00043630017452007  | 0                   | 0                    |
| unclassified(73)      | Otu000443 | 0.000544959128065395  | 0                    | 0.000763525305410122 | 0.00024965672200724 | 0.000551937299922729 |
| Acinetobacter(91)     | Otu000444 | 0                     | 0.000124968757810547 | 0.000327225130890052 | 0                   | 0                    |
| Tepidimonas(78)       | Otu000447 | 0                     | 0                    | 0                    | 0.00012482836100362 | 0                    |
| Sphingopyxis(100)     | Otu000448 | 0                     | 0                    | 0.000327225130890052 | 0                   | 0                    |
| Sphingopyxis(96)      | Otu000449 | 0.000311405216037369  | 0                    | 0                    | 0                   | 0                    |
| Sphingomonas(100)     | Otu000450 | 0.0000778513040093422 | 0                    | 0                    | 0                   | 0                    |
| Eremococcus(100)      | Otu000455 | 0                     | 0                    | 0.00163612565445026  | 0.00037448508301086 | 0                    |
| Sphingobacterium(100) | Otu000456 | 0                     | 0                    | 0.00109075043630017  | 0.00037448508301086 | 0                    |
| uncultured(87)        | Otu000461 | 0.000544959128065395  | 0                    | 0                    | 0                   | 0.000331162379953637 |
| unclassified(100)     | Otu000464 | 0                     | 0.000874781304673832 | 0                    | 0                   | 0                    |
| Pseudomonas(81)       | Otu000468 | 0                     | 0.000124968757810547 | 0                    | 0                   | 0                    |
| Rhizobium(100)        | Otu000474 | 0.0000778513040093422 | 0.000124968757810547 | 0                    | 0                   | 0                    |
| unclassified(100)     | Otu000475 | 0                     | 0                    | 0                    | 0                   | 0.000110387459984546 |
| Aquabacterium(67)     | Otu000478 | 0                     | 0                    | 0.000109075043630017 | 0                   | 0                    |
| Aquabacterium(67)     | Otu000479 | 0.000233553912028026  | 0                    | 0                    | 0                   | 0                    |
| unclassified(67)      | Otu000483 | 0                     | 0                    | 0                    | 0                   | 0.000993487139860912 |
| Novosphingobium(96)   | Otu000484 | 0.000155702608018684  | 0                    | 0                    | 0                   | 0                    |
| Arcicella(100)        | Otu000485 | 0                     | 0.000249937515621095 | 0.000327225130890052 | 0                   | 0                    |
| Sphingobium(100)      | Otu000489 | 0.000155702608018684  | 0                    | 0.000109075043630017 | 0                   | 0                    |
| Novosphingobium(95)   | Otu000491 | 0.0000778513040093422 | 0                    | 0                    | 0                   | 0                    |
| Dokdonella(85)        | Otu000492 | 0.0000778513040093422 | 0.000374906273431642 | 0                    | 0                   | 0                    |
| Novosphingobium(85)   | Otu000493 | 0.0000778513040093422 | 0                    | 0                    | 0                   | 0                    |
| unclassified(100)     | Otu000497 | 0                     | 0                    | 0                    | 0                   | 0.000110387459984546 |
| Flavobacterium(65)    | Otu000501 | 0                     | 0                    | 0                    | 0.00037448508301086 | 0                    |
| unclassified(100)     | Otu000504 | 0                     | 0.000124968757810547 | 0                    | 0                   | 0                    |
| unclassified(100)     | Otu000505 | 0.0000778513040093422 | 0                    | 0.000109075043630017 | 0                   | 0                    |
| unclassified(100)     | Otu000510 | 0                     | 0                    | 0                    | 0.00012482836100362 | 0                    |

|                       |           |                       |                      |                      |                     |                      |
|-----------------------|-----------|-----------------------|----------------------|----------------------|---------------------|----------------------|
| Aquabacterium(69)     | Otu000511 | 0.0000778513040093422 | 0                    | 0                    | 0                   | 0                    |
| Rhizobacter(95)       | Otu000512 | 0                     | 0                    | 0                    | 0                   | 0.000110387459984546 |
| Anaerococcus(100)     | Otu000513 | 0                     | 0                    | 0                    | 0.00049931344401448 | 0.00298046141958274  |
| Flavobacterium(95)    | Otu000516 | 0                     | 0.000124968757810547 | 0                    | 0                   | 0                    |
| Anaerococcus(100)     | Otu000518 | 0                     | 0.00624843789052737  | 0                    | 0                   | 0                    |
| Paracoccus(64)        | Otu000532 | 0                     | 0                    | 0                    | 0.00037448508301086 | 0                    |
| unclassified(100)     | Otu000534 | 0                     | 0.000999750062484379 | 0.000654450261780105 | 0                   | 0.000883099679876366 |
| Sphingobium(95)       | Otu000535 | 0.0000778513040093422 | 0                    | 0.000109075043630017 | 0.00012482836100362 | 0.000110387459984546 |
| unclassified(100)     | Otu000536 | 0.000233553912028026  | 0                    | 0.000545375218150087 | 0                   | 0                    |
| unclassified(53)      | Otu000540 | 0.0000778513040093422 | 0                    | 0.000109075043630017 | 0                   | 0                    |
| unclassified          | Otu000542 | 0.000622810432074737  | 0                    | 0                    | 0.00074897016602172 | 0                    |
| Rhizobium(100)        | Otu000543 | 0.000155702608018684  | 0                    | 0.000109075043630017 | 0                   | 0.000110387459984546 |
| Dysgonomonas(100)     | Otu000545 | 0                     | 0                    | 0.000109075043630017 | 0                   | 0                    |
| unclassified(100)     | Otu000547 | 0.000233553912028026  | 0.000124968757810547 | 0                    | 0                   | 0                    |
| Legionella(100)       | Otu000548 | 0.000155702608018684  | 0                    | 0.00043630017452007  | 0                   | 0.000331162379953637 |
| unclassified(100)     | Otu000550 | 0                     | 0.000124968757810547 | 0                    | 0.00012482836100362 | 0                    |
| Brevundimonas(95)     | Otu000552 | 0                     | 0                    | 0                    | 0.00012482836100362 | 0                    |
| Streptococcus(100)    | Otu000553 | 0.0000778513040093422 | 0.000124968757810547 | 0                    | 0                   | 0                    |
| Gluconobacter(100)    | Otu000554 | 0                     | 0                    | 0                    | 0                   | 0.000883099679876366 |
| Chryseobacterium(100) | Otu000556 | 0                     | 0                    | 0.000109075043630017 | 0                   | 0                    |
| Bergeyella(100)       | Otu000557 | 0.0000778513040093422 | 0.00337415646088478  | 0                    | 0.0056172762451629  | 0                    |
| Rhizobium(100)        | Otu000560 | 0                     | 0                    | 0                    | 0.00024965672200724 | 0.000110387459984546 |
| Chryseobacterium(100) | Otu000562 | 0                     | 0                    | 0.000109075043630017 | 0                   | 0                    |
| unclassified          | Otu000563 | 0                     | 0                    | 0                    | 0                   | 0.000110387459984546 |
| Caulobacter(73)       | Otu000565 | 0.0000778513040093422 | 0                    | 0                    | 0                   | 0                    |
| Phyllobacterium(100)  | Otu000567 | 0                     | 0.0021244688827793   | 0                    | 0.00012482836100362 | 0                    |
| Dysgonomonas(100)     | Otu000571 | 0                     | 0                    | 0                    | 0.00012482836100362 | 0                    |
| Sphingopyxis(59)      | Otu000579 | 0.000155702608018684  | 0                    | 0.00043630017452007  | 0.00012482836100362 | 0                    |
| unclassified(100)     | Otu000580 | 0.0000778513040093422 | 0                    | 0.000218150087260035 | 0                   | 0                    |
| unclassified(100)     | Otu000583 | 0                     | 0.000124968757810547 | 0                    | 0                   | 0                    |
| unclassified(100)     | Otu000584 | 0                     | 0                    | 0.000218150087260035 | 0                   | 0.000220774919969092 |
| Pseudomonas(100)      | Otu000586 | 0                     | 0                    | 0                    | 0.00012482836100362 | 0                    |
| Paracoccus(95)        | Otu000596 | 0                     | 0                    | 0                    | 0                   | 0.000110387459984546 |

|                          |           |                       |                      |                      |                     |                      |
|--------------------------|-----------|-----------------------|----------------------|----------------------|---------------------|----------------------|
| Paracoccus(100)          | Otu000597 | 0                     | 0                    | 0                    | 0.00012482836100362 | 0                    |
| unclassified(71)         | Otu000601 | 0.0000778513040093422 | 0                    | 0.000109075043630017 | 0                   | 0                    |
| Lacibacter(100)          | Otu000610 | 0                     | 0                    | 0.000327225130890052 | 0                   | 0                    |
| unclassified(100)        | Otu000618 | 0                     | 0                    | 0                    | 0.00012482836100362 | 0                    |
| Paracoccus(94)           | Otu000620 | 0                     | 0.000124968757810547 | 0                    | 0.00012482836100362 | 0                    |
| unclassified(100)        | Otu000628 | 0                     | 0.000124968757810547 | 0                    | 0                   | 0                    |
| Lactococcus(100)         | Otu000633 | 0.0000778513040093422 | 0.00199950012496876  | 0                    | 0.00037448508301086 | 0                    |
| Sphingomonas(100)        | Otu000635 | 0                     | 0.000874781304673832 | 0.000109075043630017 | 0.00037448508301086 | 0                    |
| Sphingobium(100)         | Otu000636 | 0.0000778513040093422 | 0                    | 0                    | 0                   | 0                    |
| Lactobacillus(100)       | Otu000640 | 0                     | 0.000624843789052737 | 0                    | 0.00237173885906878 | 0                    |
| Flexibacter(100)         | Otu000645 | 0                     | 0                    | 0                    | 0                   | 0.000110387459984546 |
| unclassified(100)        | Otu000646 | 0                     | 0                    | 0.000218150087260035 | 0                   | 0                    |
| Methylobacterium(100)    | Otu000648 | 0.000467107824056053  | 0                    | 0.000109075043630017 | 0.00399450755211584 | 0                    |
| Dysgonomonas(100)        | Otu000655 | 0                     | 0                    | 0.000109075043630017 | 0                   | 0                    |
| Dysgonomonas(100)        | Otu000659 | 0                     | 0                    | 0                    | 0.00012482836100362 | 0                    |
| Dysgonomonas(100)        | Otu000660 | 0                     | 0.000124968757810547 | 0                    | 0                   | 0                    |
| unclassified(80)         | Otu000665 | 0                     | 0                    | 0                    | 0                   | 0.000110387459984546 |
| unclassified(100)        | Otu000673 | 0                     | 0.000124968757810547 | 0                    | 0                   | 0.000220774919969092 |
| Bacillus(100)            | Otu000674 | 0                     | 0                    | 0                    | 0.00012482836100362 | 0                    |
| uncultured(100)          | Otu000678 | 0                     | 0                    | 0.000327225130890052 | 0.00012482836100362 | 0.000110387459984546 |
| unclassified(100)        | Otu000680 | 0                     | 0                    | 0                    | 0.00012482836100362 | 0                    |
| Staphylococcus(100)      | Otu000682 | 0.000233553912028026  | 0                    | 0                    | 0                   | 0                    |
| uncultured_bacterium(87) | Otu000684 | 0                     | 0                    | 0.000218150087260035 | 0.00149794033204344 | 0                    |
| Patulibacter(100)        | Otu000685 | 0                     | 0.000124968757810547 | 0.000109075043630017 | 0                   | 0                    |
| Hyphomicrobium(87)       | Otu000688 | 0                     | 0                    | 0.00283595113438045  | 0                   | 0.00176619935975273  |
| Roseomonas(87)           | Otu000695 | 0.0000778513040093422 | 0.000749812546863284 | 0.00141797556719023  | 0                   | 0.000883099679876366 |
| unclassified(100)        | Otu000701 | 0                     | 0                    | 0                    | 0.00012482836100362 | 0                    |
| Perlucidibaca(86)        | Otu000707 | 0                     | 0                    | 0.000545375218150087 | 0.00024965672200724 | 0                    |
| unclassified             | Otu000711 | 0                     | 0                    | 0                    | 0.00012482836100362 | 0.000110387459984546 |
| Aquabacterium(93)        | Otu000713 | 0                     | 0                    | 0.000218150087260035 | 0                   | 0.000110387459984546 |
| Novosphingobium(93)      | Otu000718 | 0.0000778513040093422 | 0                    | 0                    | 0                   | 0                    |
| Sphingomonas(100)        | Otu000720 | 0                     | 0                    | 0                    | 0.00112345524903258 | 0.000441549839938183 |
| Bacillus(100)            | Otu000726 | 0                     | 0                    | 0                    | 0.00024965672200724 | 0                    |

|                       |           |                       |                      |                      |                     |                      |
|-----------------------|-----------|-----------------------|----------------------|----------------------|---------------------|----------------------|
| Chryseobacterium(100) | Otu000731 | 0                     | 0.000124968757810547 | 0                    | 0                   | 0                    |
| Flexibacter(100)      | Otu000733 | 0.000233553912028026  | 0                    | 0.00043630017452007  | 0.00274622394207964 | 0.000883099679876366 |
| Caedibacter(100)      | Otu000738 | 0.0000778513040093422 | 0                    | 0.000109075043630017 | 0                   | 0                    |
| Pedobacter(79)        | Otu000739 | 0                     | 0                    | 0.000109075043630017 | 0                   | 0.000220774919969092 |
| Sphingomonas(100)     | Otu000740 | 0                     | 0                    | 0                    | 0.00074897016602172 | 0                    |
| Novosphingobium(100)  | Otu000743 | 0                     | 0.000499875031242189 | 0                    | 0                   | 0                    |
| Roseomonas(100)       | Otu000750 | 0                     | 0                    | 0                    | 0.00012482836100362 | 0                    |
| Sphingobacterium(100) | Otu000752 | 0                     | 0                    | 0                    | 0.00049931344401448 | 0                    |
| unclassified(100)     | Otu000757 | 0                     | 0                    | 0                    | 0.00012482836100362 | 0                    |
| Cytophaga(100)        | Otu000759 | 0                     | 0                    | 0.00883507853403141  | 0                   | 0.00353239871950546  |
| Enterococcus(100)     | Otu000760 | 0                     | 0.000374906273431642 | 0                    | 0                   | 0                    |
| Fusobacterium(100)    | Otu000766 | 0                     | 0                    | 0                    | 0.00037448508301086 | 0                    |
| unclassified(70)      | Otu000770 | 0.000155702608018684  | 0                    | 0                    | 0                   | 0                    |
| unclassified(100)     | Otu000787 | 0                     | 0                    | 0.000109075043630017 | 0                   | 0                    |
| Afipia(100)           | Otu000794 | 0.000544959128065395  | 0                    | 0.000109075043630017 | 0                   | 0                    |
| unclassified(70)      | Otu000804 | 0                     | 0                    | 0                    | 0.0006241418050181  | 0                    |
| Flavobacterium(100)   | Otu000805 | 0                     | 0.000124968757810547 | 0                    | 0                   | 0                    |
| Chryseobacterium(100) | Otu000809 | 0                     | 0                    | 0.000109075043630017 | 0                   | 0                    |
| unclassified(100)     | Otu000811 | 0                     | 0                    | 0.000981675392670157 | 0                   | 0                    |
| unclassified(100)     | Otu000812 | 0                     | 0                    | 0.000109075043630017 | 0                   | 0                    |
| Prevotella(100)       | Otu000816 | 0                     | 0                    | 0.00109075043630017  | 0                   | 0                    |
| unclassified(100)     | Otu000818 | 0                     | 0                    | 0                    | 0.00012482836100362 | 0                    |
| Hydrotalea(100)       | Otu000823 | 0.0000778513040093422 | 0                    | 0                    | 0                   | 0                    |
| Legionella(100)       | Otu000825 | 0                     | 0.0044988752811797   | 0                    | 0                   | 0                    |
| Novosphingobium(100)  | Otu000831 | 0.0000778513040093422 | 0                    | 0                    | 0                   | 0                    |
| unclassified(92)      | Otu000839 | 0                     | 0                    | 0                    | 0                   | 0.000110387459984546 |
| Rhodoplanes(100)      | Otu000842 | 0.0000778513040093422 | 0                    | 0                    | 0                   | 0                    |
| unclassified(100)     | Otu000843 | 0                     | 0                    | 0                    | 0.00012482836100362 | 0                    |
| Prevotella(100)       | Otu000847 | 0                     | 0.000749812546863284 | 0                    | 0                   | 0                    |
| unclassified(92)      | Otu000850 | 0                     | 0                    | 0                    | 0                   | 0.000883099679876366 |
| Chryseobacterium(100) | Otu000851 | 0                     | 0.000124968757810547 | 0                    | 0                   | 0                    |
| Novosphingobium(100)  | Otu000855 | 0.0000778513040093422 | 0                    | 0                    | 0                   | 0                    |
| Lactobacillus(100)    | Otu000857 | 0                     | 0                    | 0.000218150087260035 | 0                   | 0                    |



|                     |           |                       |                      |                      |                     |                      |
|---------------------|-----------|-----------------------|----------------------|----------------------|---------------------|----------------------|
| Dysgonomonas(92)    | Otu000860 | 0                     | 0                    | 0.000109075043630017 | 0.00024965672200724 | 0                    |
| Dysgonomonas(100)   | Otu000869 | 0                     | 0.000124968757810547 | 0                    | 0                   | 0                    |
| Anaerococcus(100)   | Otu000876 | 0                     | 0.000124968757810547 | 0                    | 0                   | 0                    |
| Nevskia(100)        | Otu000881 | 0                     | 0.000124968757810547 | 0.000109075043630017 | 0                   | 0.000110387459984546 |
| Arenimonas(100)     | Otu000885 | 0                     | 0                    | 0.000218150087260035 | 0.00037448508301086 | 0                    |
| unclassified(100)   | Otu000889 | 0                     | 0                    | 0                    | 0                   | 0.000220774919969092 |
| Roseomonas(100)     | Otu000890 | 0                     | 0.000499875031242189 | 0.000654450261780105 | 0                   | 0                    |
| unclassified(100)   | Otu000891 | 0                     | 0.000124968757810547 | 0                    | 0                   | 0.000110387459984546 |
| Dysgonomonas(82)    | Otu000896 | 0                     | 0                    | 0.000109075043630017 | 0                   | 0                    |
| Dysgonomonas(100)   | Otu000897 | 0                     | 0.000124968757810547 | 0                    | 0                   | 0                    |
| unclassified(100)   | Otu000904 | 0                     | 0.000124968757810547 | 0.000109075043630017 | 0                   | 0                    |
| Bosea(100)          | Otu000905 | 0                     | 0                    | 0.000109075043630017 | 0                   | 0                    |
| unclassified(82)    | Otu000911 | 0                     | 0                    | 0                    | 0.00012482836100362 | 0                    |
| Rhizobium(100)      | Otu000916 | 0                     | 0                    | 0                    | 0                   | 0.000110387459984546 |
| unclassified(100)   | Otu000917 | 0                     | 0                    | 0                    | 0                   | 0.00077271221989182  |
| Flavobacterium(100) | Otu000919 | 0                     | 0                    | 0                    | 0.00012482836100362 | 0                    |
| Capnocytophaga(100) | Otu000923 | 0                     | 0.00149962509372657  | 0                    | 0                   | 0                    |
| unclassified(100)   | Otu000929 | 0                     | 0.00174956260934766  | 0.000763525305410122 | 0.00012482836100362 | 0.000662324759907275 |
| unclassified(91)    | Otu000936 | 0                     | 0                    | 0.000109075043630017 | 0                   | 0                    |
| Novosphingobium(82) | Otu000944 | 0.0000778513040093422 | 0                    | 0                    | 0                   | 0                    |
| unclassified(64)    | Otu000954 | 0.000155702608018684  | 0                    | 0                    | 0                   | 0                    |
| unclassified(100)   | Otu000955 | 0.0000778513040093422 | 0                    | 0                    | 0                   | 0                    |
| unclassified(100)   | Otu000958 | 0                     | 0                    | 0.000109075043630017 | 0                   | 0                    |
| Lacibacter(100)     | Otu000960 | 0                     | 0.000124968757810547 | 0                    | 0                   | 0                    |
| Lacibacter(100)     | Otu000961 | 0                     | 0                    | 0.000327225130890052 | 0                   | 0.000110387459984546 |
| Pelomonas(61)       | Otu000965 | 0.0000778513040093422 | 0                    | 0                    | 0.00012482836100362 | 0                    |
| Lacibacter(100)     | Otu000981 | 0                     | 0                    | 0.000218150087260035 | 0                   | 0                    |
| unclassified(100)   | Otu000982 | 0.000155702608018684  | 0                    | 0                    | 0                   | 0                    |
| Devosia(100)        | Otu000984 | 0                     | 0.00124968757810547  | 0                    | 0                   | 0                    |
| Roseomonas(100)     | Otu000990 | 0                     | 0                    | 0.000109075043630017 | 0                   | 0                    |
| unclassified(100)   | Otu000993 | 0                     | 0                    | 0.000327225130890052 | 0                   | 0                    |
| unclassified(100)   | Otu000995 | 0.000233553912028026  | 0                    | 0                    | 0.00012482836100362 | 0                    |
| Dysgonomonas(100)   | Otu000997 | 0                     | 0                    | 0.000218150087260035 | 0                   | 0                    |

|                                 |           |                       |                      |                      |                     |                      |
|---------------------------------|-----------|-----------------------|----------------------|----------------------|---------------------|----------------------|
| Dysgonomonas(100)               | Otu000998 | 0                     | 0                    | 0                    | 0.00012482836100362 | 0                    |
| unclassified(100)               | Otu001007 | 0                     | 0                    | 0.000218150087260035 | 0                   | 0                    |
| uncultured_Stigmatella_sp.(70)  | Otu001023 | 0.000467107824056053  | 0.000874781304673832 | 0.00174520069808028  | 0                   | 0.00187658681973728  |
| Fusobacterium(100)              | Otu001029 | 0                     | 0                    | 0                    | 0.00162276869304706 | 0                    |
| Halomonas(100)                  | Otu001032 | 0                     | 0                    | 0.000109075043630017 | 0.00074897016602172 | 0                    |
| Amaricoccus(100)                | Otu001033 | 0                     | 0                    | 0                    | 0.00299588066408688 | 0                    |
| unclassified(90)                | Otu001036 | 0                     | 0.000124968757810547 | 0                    | 0                   | 0.000110387459984546 |
| Flavobacterium(80)              | Otu001041 | 0                     | 0                    | 0                    | 0.00287105230308326 | 0                    |
| Chryseobacterium(90)            | Otu001047 | 0                     | 0.000124968757810547 | 0                    | 0                   | 0                    |
| Chryseobacterium(100)           | Otu001050 | 0                     | 0                    | 0.000109075043630017 | 0                   | 0                    |
| Ralstonia(100)                  | Otu001052 | 0.0000778513040093422 | 0                    | 0                    | 0                   | 0                    |
| Anaerococcus(100)               | Otu001054 | 0                     | 0                    | 0                    | 0.00037448508301086 | 0                    |
| Novosphingobium(90)             | Otu001057 | 0.000155702608018684  | 0                    | 0                    | 0                   | 0                    |
| Novosphingobium(100)            | Otu001058 | 0.000233553912028026  | 0                    | 0                    | 0                   | 0.000110387459984546 |
| Sphingobium(100)                | Otu001061 | 0                     | 0                    | 0                    | 0.00012482836100362 | 0                    |
| Novosphingobium(90)             | Otu001062 | 0                     | 0.000124968757810547 | 0                    | 0                   | 0                    |
| Novosphingobium(100)            | Otu001063 | 0.000467107824056053  | 0                    | 0                    | 0                   | 0                    |
| Rhizobiales_bacterium_NHI-8(70) | Otu001065 | 0                     | 0                    | 0                    | 0                   | 0.000110387459984546 |
| unclassified(80)                | Otu001070 | 0.000155702608018684  | 0                    | 0                    | 0                   | 0                    |
| Aquabacterium(100)              | Otu001072 | 0                     | 0                    | 0.000109075043630017 | 0                   | 0                    |
| Aquabacterium(80)               | Otu001073 | 0                     | 0.000124968757810547 | 0                    | 0                   | 0.000110387459984546 |
| Tepidimonas(100)                | Otu001074 | 0                     | 0                    | 0                    | 0.00012482836100362 | 0                    |
| Aquabacterium(100)              | Otu001076 | 0.0000778513040093422 | 0                    | 0                    | 0                   | 0                    |
| Aquabacterium(90)               | Otu001078 | 0                     | 0                    | 0.000109075043630017 | 0                   | 0                    |
| Altererythrobacter(61)          | Otu001080 | 0                     | 0                    | 0                    | 0.00012482836100362 | 0                    |
| unclassified(100)               | Otu001091 | 0.0000778513040093422 | 0                    | 0                    | 0                   | 0.000110387459984546 |
| Gluconobacter(100)              | Otu001093 | 0                     | 0                    | 0                    | 0                   | 0.000331162379953637 |
| Ochrobactrum(100)               | Otu001095 | 0                     | 0.000124968757810547 | 0.000109075043630017 | 0                   | 0                    |
| Caedibacter(89)                 | Otu001100 | 0.000233553912028026  | 0                    | 0                    | 0                   | 0                    |
| Caedibacter(100)                | Otu001101 | 0.0000778513040093422 | 0                    | 0                    | 0                   | 0                    |
| Halomonas(100)                  | Otu001103 | 0                     | 0.000874781304673832 | 0                    | 0                   | 0                    |
| Alkalibacterium(100)            | Otu001104 | 0                     | 0.000124968757810547 | 0                    | 0                   | 0                    |
| Lachnoanaerobaculum(100)        | Otu001106 | 0                     | 0                    | 0                    | 0                   | 0.00143503697979909  |

|                                 |           |                       |                      |                      |                     |                      |
|---------------------------------|-----------|-----------------------|----------------------|----------------------|---------------------|----------------------|
| unclassified(78)                | Otu001110 | 0                     | 0                    | 0                    | 0.0024965672200724  | 0.00077271221989182  |
| Bosea(100)                      | Otu001113 | 0                     | 0                    | 0.000218150087260035 | 0                   | 0                    |
| Rhodopseudomonas(100)           | Otu001114 | 0.000233553912028026  | 0                    | 0                    | 0                   | 0.000551937299922729 |
| Acinetobacter(100)              | Otu001116 | 0                     | 0                    | 0                    | 0                   | 0.000110387459984546 |
| unclassified(100)               | Otu001124 | 0                     | 0                    | 0                    | 0                   | 0.000110387459984546 |
| Brevundimonas(100)              | Otu001128 | 0                     | 0                    | 0                    | 0.00012482836100362 | 0                    |
| Dysgonomonas(100)               | Otu001130 | 0                     | 0.000124968757810547 | 0                    | 0                   | 0                    |
| Dysgonomonas(100)               | Otu001133 | 0                     | 0.000124968757810547 | 0                    | 0                   | 0                    |
| Schlegelella(100)               | Otu001136 | 0                     | 0                    | 0.00043630017452007  | 0                   | 0.000441549839938183 |
| Aquabacterium(89)               | Otu001138 | 0                     | 0                    | 0.000109075043630017 | 0                   | 0                    |
| unclassified(100)               | Otu001141 | 0.0000778513040093422 | 0                    | 0                    | 0                   | 0                    |
| Flavobacterium(100)             | Otu001147 | 0                     | 0                    | 0.00109075043630017  | 0.00012482836100362 | 0                    |
| Flavobacterium(100)             | Otu001150 | 0                     | 0                    | 0                    | 0.00024965672200724 | 0                    |
| unclassified(100)               | Otu001173 | 0.0000778513040093422 | 0                    | 0                    | 0                   | 0                    |
| unclassified(78)                | Otu001183 | 0                     | 0                    | 0                    | 0                   | 0.00165581189976819  |
| Ferruginibacter(100)            | Otu001184 | 0                     | 0                    | 0.00043630017452007  | 0                   | 0                    |
| unclassified(56)                | Otu001190 | 0.000311405216037369  | 0                    | 0                    | 0                   | 0                    |
| unclassified(100)               | Otu001195 | 0                     | 0.00224943764058985  | 0                    | 0                   | 0                    |
| unclassified(100)               | Otu001196 | 0.0000778513040093422 | 0                    | 0.000109075043630017 | 0                   | 0                    |
| Pseudomonas(100)                | Otu001198 | 0                     | 0.000124968757810547 | 0                    | 0                   | 0.000110387459984546 |
| Methylobacterium(100)           | Otu001200 | 0.0000778513040093422 | 0                    | 0                    | 0                   | 0                    |
| Asaia(56)                       | Otu001211 | 0                     | 0                    | 0                    | 0                   | 0.000110387459984546 |
| unclassified(89)                | Otu001212 | 0                     | 0                    | 0                    | 0.00049931344401448 | 0                    |
| unclassified(100)               | Otu001219 | 0                     | 0                    | 0.000109075043630017 | 0                   | 0                    |
| Abiotrophia(100)                | Otu001225 | 0                     | 0                    | 0                    | 0.00137311197103982 | 0                    |
| Candidatus_Rhabdochlamydia(100) | Otu001229 | 0.0000778513040093422 | 0                    | 0                    | 0                   | 0                    |
| Gluconobacter(75)               | Otu001248 | 0                     | 0                    | 0                    | 0                   | 0.000331162379953637 |
| unclassified(100)               | Otu001263 | 0                     | 0                    | 0                    | 0                   | 0.000110387459984546 |
| Rubellimicrobium(100)           | Otu001275 | 0                     | 0                    | 0                    | 0                   | 0.00132464951981455  |
| unclassified(63)                | Otu001283 | 0                     | 0                    | 0                    | 0                   | 0.000110387459984546 |
| unclassified(100)               | Otu001284 | 0.0000778513040093422 | 0                    | 0                    | 0                   | 0                    |
| unclassified(63)                | Otu001285 | 0                     | 0                    | 0                    | 0                   | 0.000110387459984546 |
| Cloacibacterium(100)            | Otu001288 | 0                     | 0.000124968757810547 | 0                    | 0                   | 0                    |

|                       |           |                       |                      |                      |                     |                      |
|-----------------------|-----------|-----------------------|----------------------|----------------------|---------------------|----------------------|
| Chryseobacterium(88)  | Otu001289 | 0                     | 0                    | 0                    | 0.00012482836100362 | 0                    |
| unclassified(100)     | Otu001299 | 0                     | 0                    | 0.000109075043630017 | 0                   | 0                    |
| Phenyllobacterium(88) | Otu001300 | 0                     | 0.000124968757810547 | 0                    | 0                   | 0                    |
| Flavobacterium(100)   | Otu001303 | 0                     | 0.000124968757810547 | 0                    | 0                   | 0                    |
| Parvimonas(100)       | Otu001305 | 0.0000778513040093422 | 0                    | 0                    | 0                   | 0                    |
| Blastomonas(100)      | Otu001308 | 0.000700661736084079  | 0                    | 0                    | 0                   | 0                    |
| Sphingopyxis(88)      | Otu001311 | 0.0000778513040093422 | 0                    | 0                    | 0                   | 0                    |
| Sphingomonas(100)     | Otu001312 | 0.000155702608018684  | 0                    | 0                    | 0                   | 0                    |
| Novosphingobium(100)  | Otu001313 | 0.000155702608018684  | 0                    | 0                    | 0                   | 0                    |
| Sphingomonas(100)     | Otu001315 | 0                     | 0                    | 0                    | 0.0018724254150543  | 0                    |
| Nubsella(63)          | Otu001333 | 0                     | 0                    | 0                    | 0                   | 0.00132464951981455  |
| unclassified(100)     | Otu001336 | 0.000155702608018684  | 0                    | 0                    | 0                   | 0                    |
| Pedobacter(100)       | Otu001350 | 0                     | 0                    | 0                    | 0.00012482836100362 | 0                    |
| unclassified(100)     | Otu001353 | 0                     | 0.000124968757810547 | 0.000109075043630017 | 0                   | 0                    |
| unclassified(100)     | Otu001357 | 0                     | 0.000124968757810547 | 0                    | 0                   | 0                    |
| Veillonella(100)      | Otu001369 | 0                     | 0                    | 0.000545375218150087 | 0                   | 0                    |
| Dysgonomonas(100)     | Otu001372 | 0                     | 0                    | 0.000218150087260035 | 0.00012482836100362 | 0                    |
| Ochrobactrum(100)     | Otu001375 | 0                     | 0                    | 0                    | 0.00012482836100362 | 0                    |
| Hyphomicrobium(100)   | Otu001387 | 0                     | 0                    | 0.000109075043630017 | 0                   | 0                    |
| unclassified(100)     | Otu001391 | 0                     | 0                    | 0                    | 0                   | 0.000220774919969092 |
| Bosea(100)            | Otu001404 | 0                     | 0                    | 0.00087260034904014  | 0                   | 0.000220774919969092 |
| Pseudomonas(100)      | Otu001405 | 0                     | 0                    | 0                    | 0.00012482836100362 | 0                    |
| unclassified(100)     | Otu001414 | 0.000155702608018684  | 0                    | 0                    | 0                   | 0                    |
| Pseudomonas(75)       | Otu001418 | 0                     | 0                    | 0                    | 0                   | 0.000110387459984546 |
| Rubellimicrobium(86)  | Otu001420 | 0                     | 0.000499875031242189 | 0                    | 0                   | 0                    |
| unclassified(72)      | Otu001423 | 0                     | 0                    | 0.000763525305410122 | 0                   | 0                    |
| unclassified(100)     | Otu001426 | 0                     | 0                    | 0                    | 0                   | 0.000441549839938183 |
| unclassified          | Otu001434 | 0                     | 0                    | 0.00239965095986038  | 0                   | 0                    |
| unclassified(72)      | Otu001440 | 0                     | 0                    | 0                    | 0                   | 0.000220774919969092 |
| Dysgonomonas(100)     | Otu001445 | 0                     | 0.000124968757810547 | 0                    | 0                   | 0                    |
| Dysgonomonas(100)     | Otu001447 | 0                     | 0                    | 0                    | 0                   | 0.000110387459984546 |
| unclassified(100)     | Otu001452 | 0                     | 0                    | 0                    | 0.00012482836100362 | 0                    |
| unclassified(100)     | Otu001462 | 0                     | 0                    | 0.00141797556719023  | 0                   | 0                    |

|                       |           |                       |                      |                      |                     |                      |
|-----------------------|-----------|-----------------------|----------------------|----------------------|---------------------|----------------------|
| unclassified(100)     | Otu001474 | 0                     | 0                    | 0                    | 0                   | 0.000110387459984546 |
| unclassified(100)     | Otu001476 | 0                     | 0                    | 0                    | 0                   | 0.000220774919969092 |
| unclassified(100)     | Otu001480 | 0                     | 0.000124968757810547 | 0                    | 0                   | 0                    |
| unclassified(100)     | Otu001484 | 0                     | 0                    | 0.000109075043630017 | 0                   | 0                    |
| Hymenobacter(100)     | Otu001491 | 0                     | 0.00112471882029493  | 0                    | 0                   | 0                    |
| Rhodopseudomonas(58)  | Otu001499 | 0.000155702608018684  | 0                    | 0                    | 0                   | 0                    |
| unclassified(100)     | Otu001528 | 0                     | 0.000124968757810547 | 0                    | 0                   | 0                    |
| unclassified(100)     | Otu001536 | 0                     | 0.00137465633591602  | 0.00043630017452007  | 0.00037448508301086 | 0.000331162379953637 |
| Aquabacterium(86)     | Otu001541 | 0                     | 0.000124968757810547 | 0                    | 0                   | 0                    |
| Sphingomonas(100)     | Otu001559 | 0                     | 0                    | 0                    | 0.00037448508301086 | 0.000993487139860912 |
| Anaerococcus(100)     | Otu001566 | 0                     | 0                    | 0                    | 0.00012482836100362 | 0                    |
| Staphylococcus(100)   | Otu001571 | 0                     | 0                    | 0                    | 0.00012482836100362 | 0                    |
| Jeotgalicoccus(86)    | Otu001572 | 0                     | 0                    | 0                    | 0.00012482836100362 | 0                    |
| Pseudomonas(72)       | Otu001578 | 0                     | 0                    | 0                    | 0.0006241418050181  | 0                    |
| Chryseobacterium(100) | Otu001592 | 0                     | 0.000749812546863284 | 0                    | 0                   | 0                    |
| Stenotrophomonas(100) | Otu001595 | 0                     | 0.000124968757810547 | 0                    | 0                   | 0                    |
| unclassified(100)     | Otu001603 | 0.0000778513040093422 | 0                    | 0                    | 0                   | 0                    |
| unclassified(100)     | Otu001609 | 0                     | 0.00249937515621095  | 0.00043630017452007  | 0                   | 0                    |
| Chryseobacterium(100) | Otu001637 | 0                     | 0                    | 0                    | 0                   | 0.000110387459984546 |
| Flavobacterium(100)   | Otu001638 | 0                     | 0                    | 0                    | 0                   | 0.00110387459984546  |
| Hyphomicrobium(100)   | Otu001645 | 0                     | 0                    | 0                    | 0.00174759705405068 | 0                    |
| Deinococcus(100)      | Otu001659 | 0                     | 0                    | 0                    | 0                   | 0.000110387459984546 |
| uncultured(100)       | Otu001662 | 0.000155702608018684  | 0                    | 0                    | 0                   | 0.00110387459984546  |
| Caedibacter(100)      | Otu001663 | 0.0000778513040093422 | 0                    | 0                    | 0                   | 0                    |
| uncultured(100)       | Otu001665 | 0                     | 0                    | 0                    | 0.00099862688802896 | 0                    |
| Roseburia(100)        | Otu001721 | 0                     | 0.000124968757810547 | 0                    | 0                   | 0                    |
| Blautia(100)          | Otu001723 | 0                     | 0                    | 0                    | 0                   | 0.000220774919969092 |
| Anaerostipes(100)     | Otu001725 | 0                     | 0                    | 0                    | 0                   | 0.000331162379953637 |
| Bacteroides(100)      | Otu001726 | 0                     | 0                    | 0                    | 0                   | 0.000110387459984546 |
| Staphylococcus(84)    | Otu001728 | 0                     | 0                    | 0                    | 0.00012482836100362 | 0                    |
| Pedomicrobium(100)    | Otu001731 | 0                     | 0.00112471882029493  | 0.000763525305410122 | 0                   | 0.000331162379953637 |
| Devosia(100)          | Otu001734 | 0                     | 0                    | 0                    | 0.00037448508301086 | 0                    |
| unclassified          | Otu001739 | 0                     | 0.000124968757810547 | 0                    | 0                   | 0                    |

|                       |           |                       |                      |                      |                     |                      |
|-----------------------|-----------|-----------------------|----------------------|----------------------|---------------------|----------------------|
| unclassified(100)     | Otu001747 | 0                     | 0.000124968757810547 | 0.000109075043630017 | 0                   | 0                    |
| unclassified(100)     | Otu001748 | 0.0000778513040093422 | 0                    | 0                    | 0                   | 0                    |
| unclassified(84)      | Otu001749 | 0                     | 0                    | 0                    | 0.00012482836100362 | 0                    |
| unclassified(100)     | Otu001761 | 0                     | 0                    | 0                    | 0                   | 0.000110387459984546 |
| Rhodobium(100)        | Otu001773 | 0                     | 0.000624843789052737 | 0                    | 0                   | 0.000331162379953637 |
| uncultured(100)       | Otu001775 | 0                     | 0                    | 0                    | 0.00024965672200724 | 0                    |
| Hymenobacter(100)     | Otu001777 | 0                     | 0                    | 0                    | 0                   | 0.00132464951981455  |
| Flexibacter(100)      | Otu001785 | 0                     | 0                    | 0.000109075043630017 | 0                   | 0                    |
| Hymenobacter(100)     | Otu001787 | 0                     | 0                    | 0                    | 0                   | 0.000883099679876366 |
| Cytophaga(100)        | Otu001789 | 0                     | 0                    | 0                    | 0.00037448508301086 | 0                    |
| Dyadobacter(100)      | Otu001790 | 0                     | 0.000749812546863284 | 0                    | 0                   | 0                    |
| Hymenobacter(100)     | Otu001794 | 0                     | 0                    | 0.0025087260034904   | 0                   | 0                    |
| unclassified(84)      | Otu001798 | 0                     | 0                    | 0                    | 0                   | 0.00761673473893366  |
| Bdellovibrio(100)     | Otu001801 | 0                     | 0.000874781304673832 | 0                    | 0                   | 0                    |
| Chryseobacterium(100) | Otu001804 | 0                     | 0.000124968757810547 | 0                    | 0                   | 0                    |
| Chryseobacterium(100) | Otu001805 | 0                     | 0                    | 0                    | 0                   | 0.000883099679876366 |
| Chryseobacterium(100) | Otu001806 | 0                     | 0                    | 0                    | 0.00012482836100362 | 0.00143503697979909  |
| unclassified(100)     | Otu001853 | 0                     | 0.000499875031242189 | 0                    | 0                   | 0                    |
| Prevotella(100)       | Otu001865 | 0                     | 0                    | 0.000109075043630017 | 0                   | 0                    |
| Marinomonas(100)      | Otu001870 | 0                     | 0                    | 0                    | 0.00099862688802896 | 0                    |
| Lysobacter(84)        | Otu001886 | 0.0000778513040093422 | 0                    | 0                    | 0                   | 0                    |
| unclassified(100)     | Otu001905 | 0                     | 0.000124968757810547 | 0                    | 0                   | 0                    |
| Pedobacter(100)       | Otu001911 | 0                     | 0.000249937515621095 | 0                    | 0                   | 0                    |
| unclassified(100)     | Otu001912 | 0                     | 0                    | 0.000109075043630017 | 0                   | 0                    |
| Dysgonomonas(100)     | Otu001919 | 0                     | 0                    | 0.000109075043630017 | 0                   | 0                    |
| unclassified(67)      | Otu001920 | 0                     | 0                    | 0                    | 0                   | 0.000331162379953637 |
| Chryseobacterium(100) | Otu001922 | 0                     | 0                    | 0                    | 0.00012482836100362 | 0                    |
| Chryseobacterium(100) | Otu001928 | 0                     | 0                    | 0                    | 0.00012482836100362 | 0                    |
| Reyranella(100)       | Otu001934 | 0.000389256520046711  | 0                    | 0                    | 0                   | 0                    |
| unclassified(67)      | Otu001942 | 0.000311405216037369  | 0                    | 0                    | 0                   | 0                    |
| Sphingopyxis(84)      | Otu001952 | 0                     | 0                    | 0.000109075043630017 | 0                   | 0                    |
| Sphingomonas(100)     | Otu001959 | 0                     | 0.000874781304673832 | 0                    | 0                   | 0                    |
| Methylobacterium(100) | Otu001960 | 0                     | 0.000624843789052737 | 0                    | 0                   | 0                    |

|                       |           |                       |                      |                      |                     |                      |
|-----------------------|-----------|-----------------------|----------------------|----------------------|---------------------|----------------------|
| Methylobacterium(100) | Otu001961 | 0.0000778513040093422 | 0                    | 0                    | 0.00024965672200724 | 0                    |
| Dysgonomonas(100)     | Otu001965 | 0                     | 0                    | 0                    | 0.00012482836100362 | 0.000110387459984546 |
| Chryseobacterium(100) | Otu001973 | 0                     | 0                    | 0                    | 0                   | 0.000110387459984546 |
| Aquabacterium(84)     | Otu001990 | 0                     | 0                    | 0.000109075043630017 | 0                   | 0                    |
| Aquabacterium(67)     | Otu001991 | 0                     | 0                    | 0.000109075043630017 | 0                   | 0                    |
| unclassified(100)     | Otu001998 | 0                     | 0                    | 0                    | 0                   | 0.000220774919969092 |
| unclassified(84)      | Otu001999 | 0.0000778513040093422 | 0                    | 0                    | 0                   | 0                    |
| unclassified(67)      | Otu002005 | 0                     | 0.000124968757810547 | 0                    | 0                   | 0                    |
| unclassified(100)     | Otu002012 | 0                     | 0                    | 0                    | 0.00024965672200724 | 0.000662324759907275 |
| Alkanindiges(67)      | Otu002015 | 0                     | 0                    | 0                    | 0.00012482836100362 | 0                    |
| Aeromonas(100)        | Otu002028 | 0                     | 0                    | 0                    | 0.00012482836100362 | 0                    |
| unclassified(100)     | Otu002046 | 0                     | 0                    | 0                    | 0                   | 0.000110387459984546 |
| unclassified(100)     | Otu002047 | 0.0000778513040093422 | 0                    | 0                    | 0                   | 0                    |
| Aquabacterium(84)     | Otu002048 | 0                     | 0                    | 0.000109075043630017 | 0                   | 0                    |
| Rubellimicrobium(100) | Otu002051 | 0                     | 0                    | 0                    | 0.00024965672200724 | 0                    |
| Rubellimicrobium(100) | Otu002053 | 0                     | 0                    | 0                    | 0                   | 0.000551937299922729 |
| Rubellimicrobium(84)  | Otu002056 | 0                     | 0                    | 0                    | 0.00162276869304706 | 0.000220774919969092 |
| Bergeyella(100)       | Otu002061 | 0                     | 0.000124968757810547 | 0                    | 0                   | 0                    |
| Aquabacterium(100)    | Otu002072 | 0                     | 0                    | 0.000109075043630017 | 0                   | 0                    |
| Aquabacterium(100)    | Otu002075 | 0.0000778513040093422 | 0                    | 0                    | 0                   | 0                    |
| Aquabacterium(80)     | Otu002087 | 0.0000778513040093422 | 0                    | 0                    | 0                   | 0                    |
| unclassified(61)      | Otu002090 | 0                     | 0                    | 0                    | 0                   | 0.00242852411966001  |
| Aquabacterium(100)    | Otu002096 | 0                     | 0                    | 0                    | 0                   | 0.000110387459984546 |
| unclassified(61)      | Otu002102 | 0                     | 0                    | 0                    | 0                   | 0.000331162379953637 |
| unclassified(100)     | Otu002123 | 0                     | 0.000124968757810547 | 0                    | 0                   | 0                    |
| Paracoccus(100)       | Otu002138 | 0                     | 0                    | 0                    | 0                   | 0.000551937299922729 |
| unclassified(100)     | Otu002147 | 0                     | 0                    | 0                    | 0                   | 0.000662324759907275 |
| unclassified(100)     | Otu002154 | 0                     | 0                    | 0.000109075043630017 | 0                   | 0                    |
| unclassified(100)     | Otu002169 | 0                     | 0                    | 0                    | 0                   | 0.000110387459984546 |
| Methylobacterium(100) | Otu002196 | 0.0000778513040093422 | 0                    | 0                    | 0                   | 0                    |
| Brevundimonas(100)    | Otu002210 | 0                     | 0                    | 0                    | 0.00012482836100362 | 0                    |
| Caulobacter(80)       | Otu002213 | 0.000155702608018684  | 0                    | 0                    | 0                   | 0                    |
| Legionella(100)       | Otu002258 | 0                     | 0.000749812546863284 | 0                    | 0                   | 0                    |

|                       |           |                       |                      |                      |                     |                      |
|-----------------------|-----------|-----------------------|----------------------|----------------------|---------------------|----------------------|
| Legionella(100)       | Otu002262 | 0                     | 0                    | 0.000327225130890052 | 0                   | 0                    |
| Legionella(100)       | Otu002263 | 0                     | 0                    | 0                    | 0.00024965672200724 | 0                    |
| unclassified(100)     | Otu002281 | 0                     | 0                    | 0                    | 0                   | 0.000220774919969092 |
| Lactococcus(100)      | Otu002287 | 0                     | 0                    | 0                    | 0.0006241418050181  | 0                    |
| Pseudomonas(100)      | Otu002299 | 0                     | 0.000124968757810547 | 0                    | 0                   | 0                    |
| Pseudomonas(100)      | Otu002306 | 0                     | 0                    | 0.000109075043630017 | 0                   | 0.000110387459984546 |
| Novosphingobium(61)   | Otu002320 | 0.0000778513040093422 | 0                    | 0                    | 0                   | 0                    |
| Sphingomonas(100)     | Otu002332 | 0                     | 0                    | 0                    | 0                   | 0.000110387459984546 |
| unclassified(80)      | Otu002333 | 0                     | 0                    | 0                    | 0                   | 0.000110387459984546 |
| Sphingopyxis(100)     | Otu002336 | 0                     | 0                    | 0                    | 0                   | 0.000110387459984546 |
| Sphingomonas(80)      | Otu002337 | 0                     | 0                    | 0.000109075043630017 | 0                   | 0                    |
| unclassified(61)      | Otu002338 | 0.0000778513040093422 | 0                    | 0                    | 0                   | 0                    |
| Sphingomonas(100)     | Otu002352 | 0.0000778513040093422 | 0                    | 0                    | 0                   | 0                    |
| Acinetobacter(100)    | Otu002360 | 0                     | 0                    | 0                    | 0.00012482836100362 | 0                    |
| Dysgonomonas(100)     | Otu002363 | 0                     | 0                    | 0                    | 0.00012482836100362 | 0                    |
| Dysgonomonas(100)     | Otu002368 | 0                     | 0                    | 0.000109075043630017 | 0                   | 0                    |
| Dysgonomonas(100)     | Otu002369 | 0                     | 0                    | 0                    | 0                   | 0.000110387459984546 |
| Porphyromonas(100)    | Otu002371 | 0.0000778513040093422 | 0                    | 0                    | 0                   | 0                    |
| Dysgonomonas(100)     | Otu002373 | 0                     | 0.000124968757810547 | 0                    | 0                   | 0                    |
| Dysgonomonas(100)     | Otu002381 | 0                     | 0.000124968757810547 | 0                    | 0                   | 0                    |
| Afipia(100)           | Otu002383 | 0.0000778513040093422 | 0                    | 0                    | 0                   | 0.000110387459984546 |
| unclassified(61)      | Otu002396 | 0.000155702608018684  | 0                    | 0                    | 0                   | 0                    |
| Rhizobium(100)        | Otu002407 | 0.0000778513040093422 | 0                    | 0                    | 0                   | 0                    |
| unclassified(100)     | Otu002431 | 0                     | 0.000124968757810547 | 0                    | 0                   | 0                    |
| unclassified(100)     | Otu002441 | 0.0014791747761775    | 0                    | 0                    | 0                   | 0                    |
| Ochrobactrum(100)     | Otu002443 | 0                     | 0.000124968757810547 | 0                    | 0                   | 0                    |
| Rhizobium(100)        | Otu002445 | 0                     | 0                    | 0                    | 0                   | 0.000110387459984546 |
| Capnocytophaga(100)   | Otu002489 | 0                     | 0.000999750062484379 | 0                    | 0                   | 0                    |
| Catonella(100)        | Otu002503 | 0                     | 0                    | 0                    | 0                   | 0.000110387459984546 |
| Chryseobacterium(100) | Otu002527 | 0.0000778513040093422 | 0                    | 0                    | 0.00037448508301086 | 0                    |
| Ralstonia(80)         | Otu002537 | 0.0000778513040093422 | 0                    | 0                    | 0                   | 0                    |
| Prevotella(100)       | Otu002544 | 0                     | 0                    | 0                    | 0.00087379852702534 | 0                    |
| Chryseobacterium(100) | Otu002561 | 0                     | 0.000124968757810547 | 0                    | 0                   | 0                    |



|                      |           |                       |                      |                      |                     |                      |
|----------------------|-----------|-----------------------|----------------------|----------------------|---------------------|----------------------|
| Lacibacter(100)      | Otu002566 | 0                     | 0                    | 0.000109075043630017 | 0                   | 0                    |
| Sphingobacterium(80) | Otu002589 | 0                     | 0                    | 0                    | 0                   | 0.000220774919969092 |
| unclassified(100)    | Otu002599 | 0                     | 0.00124968757810547  | 0                    | 0                   | 0                    |
| Hymenobacter(100)    | Otu002622 | 0                     | 0                    | 0                    | 0.00012482836100362 | 0                    |
| Hymenobacter(100)    | Otu002623 | 0                     | 0.000874781304673832 | 0                    | 0.00024965672200724 | 0                    |
| Cytophaga(100)       | Otu002624 | 0                     | 0                    | 0.000109075043630017 | 0                   | 0                    |
| unclassified(100)    | Otu002659 | 0                     | 0                    | 0                    | 0.00012482836100362 | 0                    |
| unclassified(100)    | Otu002660 | 0                     | 0                    | 0                    | 0                   | 0.000110387459984546 |
| Dysgonomonas(100)    | Otu002662 | 0                     | 0                    | 0.000109075043630017 | 0                   | 0                    |
| unclassified(100)    | Otu002668 | 0                     | 0                    | 0.000109075043630017 | 0                   | 0                    |
| unclassified(100)    | Otu002673 | 0                     | 0                    | 0                    | 0                   | 0.000110387459984546 |
| Dysgonomonas(100)    | Otu002684 | 0                     | 0.000124968757810547 | 0                    | 0                   | 0                    |
| uncultured(100)      | Otu002696 | 0                     | 0.000499875031242189 | 0                    | 0                   | 0                    |
| Bergeyella(100)      | Otu002722 | 0                     | 0                    | 0                    | 0.00012482836100362 | 0                    |
| Legionella(100)      | Otu002727 | 0                     | 0.00124968757810547  | 0                    | 0                   | 0                    |
| unclassified(100)    | Otu002733 | 0                     | 0                    | 0.000109075043630017 | 0                   | 0                    |
| unclassified(100)    | Otu002754 | 0                     | 0.000124968757810547 | 0                    | 0                   | 0                    |
| unclassified(100)    | Otu002755 | 0                     | 0                    | 0.000109075043630017 | 0                   | 0                    |
| Legionella(100)      | Otu002762 | 0                     | 0                    | 0                    | 0                   | 0.000331162379953637 |
| Dysgonomonas(100)    | Otu002768 | 0                     | 0                    | 0.000109075043630017 | 0                   | 0                    |
| unclassified         | Otu002783 | 0                     | 0                    | 0                    | 0                   | 0.000110387459984546 |
| Aquabacterium(75)    | Otu002786 | 0.0000778513040093422 | 0                    | 0                    | 0                   | 0                    |
| Aquabacterium(100)   | Otu002792 | 0.0000778513040093422 | 0                    | 0                    | 0                   | 0                    |
| Dysgonomonas(100)    | Otu002804 | 0                     | 0.000124968757810547 | 0                    | 0                   | 0                    |
| Dysgonomonas(100)    | Otu002809 | 0                     | 0                    | 0.000109075043630017 | 0                   | 0                    |
| Dysgonomonas(100)    | Otu002810 | 0                     | 0.000124968757810547 | 0                    | 0                   | 0                    |
| unclassified(100)    | Otu002819 | 0                     | 0.000124968757810547 | 0                    | 0                   | 0                    |
| Aquabacterium(75)    | Otu002843 | 0                     | 0                    | 0                    | 0                   | 0.000110387459984546 |
| unclassified         | Otu002849 | 0                     | 0                    | 0                    | 0                   | 0.000110387459984546 |
| unclassified(100)    | Otu002850 | 0.0000778513040093422 | 0                    | 0                    | 0                   | 0                    |
| Dysgonomonas(100)    | Otu002865 | 0                     | 0.000124968757810547 | 0                    | 0                   | 0                    |
| Aquabacterium(100)   | Otu002873 | 0                     | 0                    | 0                    | 0                   | 0.000110387459984546 |
| unclassified         | Otu002875 | 0                     | 0                    | 0                    | 0                   | 0.000110387459984546 |

|                                 |           |                       |                      |                      |                     |                      |
|---------------------------------|-----------|-----------------------|----------------------|----------------------|---------------------|----------------------|
| unclassified(75)                | Otu002879 | 0                     | 0                    | 0                    | 0                   | 0.000110387459984546 |
| Aquabacterium(75)               | Otu002890 | 0                     | 0                    | 0.000109075043630017 | 0                   | 0                    |
| Dysgonomonas(100)               | Otu002892 | 0                     | 0                    | 0                    | 0                   | 0.000110387459984546 |
| unclassified(100)               | Otu002894 | 0                     | 0.000124968757810547 | 0                    | 0                   | 0                    |
| Aquabacterium(100)              | Otu002901 | 0.0000778513040093422 | 0                    | 0                    | 0                   | 0                    |
| Dysgonomonas(100)               | Otu002905 | 0                     | 0                    | 0                    | 0.00012482836100362 | 0                    |
| unclassified(100)               | Otu002940 | 0.000155702608018684  | 0.000124968757810547 | 0.00152705061082024  | 0                   | 0.000220774919969092 |
| Leptotrichia(100)               | Otu002947 | 0                     | 0.000124968757810547 | 0                    | 0.00012482836100362 | 0                    |
| Adhaeribacter(100)              | Otu002968 | 0                     | 0                    | 0                    | 0                   | 0.000551937299922729 |
| unclassified(100)               | Otu003008 | 0                     | 0                    | 0                    | 0.00012482836100362 | 0                    |
| Planctomyces(100)               | Otu003027 | 0                     | 0                    | 0                    | 0                   | 0.000220774919969092 |
| Gluconobacter(100)              | Otu003048 | 0                     | 0                    | 0                    | 0                   | 0.000110387459984546 |
| Bryobacter(100)                 | Otu003063 | 0.0000778513040093422 | 0.000249937515621095 | 0                    | 0                   | 0.000551937299922729 |
| unclassified(100)               | Otu003066 | 0                     | 0                    | 0                    | 0                   | 0.000110387459984546 |
| unclassified(100)               | Otu003069 | 0                     | 0                    | 0.000981675392670157 | 0                   | 0.000110387459984546 |
| unclassified(100)               | Otu003070 | 0                     | 0.000124968757810547 | 0                    | 0                   | 0                    |
| unclassified(100)               | Otu003078 | 0                     | 0                    | 0                    | 0                   | 0.000110387459984546 |
| unclassified(100)               | Otu003089 | 0                     | 0                    | 0                    | 0                   | 0.000110387459984546 |
| unclassified(100)               | Otu003096 | 0                     | 0                    | 0                    | 0.00012482836100362 | 0                    |
| unclassified(100)               | Otu003117 | 0                     | 0.000124968757810547 | 0                    | 0                   | 0                    |
| unclassified(100)               | Otu003143 | 0.000155702608018684  | 0                    | 0                    | 0                   | 0                    |
| Candidatus_Proteochlamydia(100) | Otu003146 | 0                     | 0                    | 0                    | 0.00049931344401448 | 0                    |
| unclassified(75)                | Otu003185 | 0                     | 0                    | 0                    | 0.00024965672200724 | 0.000331162379953637 |
| unclassified(100)               | Otu003226 | 0                     | 0                    | 0                    | 0.0006241418050181  | 0                    |
| unclassified                    | Otu003228 | 0                     | 0                    | 0                    | 0                   | 0.000110387459984546 |
| Prevotella(100)                 | Otu003233 | 0                     | 0                    | 0                    | 0.00037448508301086 | 0                    |
| Prevotella(100)                 | Otu003251 | 0                     | 0                    | 0                    | 0.00012482836100362 | 0                    |
| Sphingobium(100)                | Otu003281 | 0                     | 0                    | 0                    | 0.00024965672200724 | 0.000220774919969092 |
| unclassified(75)                | Otu003284 | 0.000155702608018684  | 0                    | 0                    | 0                   | 0                    |
| unclassified                    | Otu003296 | 0                     | 0                    | 0                    | 0.00012482836100362 | 0                    |
| Methylobacterium(100)           | Otu003315 | 0                     | 0                    | 0                    | 0                   | 0.000110387459984546 |
| uncultured(100)                 | Otu003322 | 0.0000778513040093422 | 0                    | 0                    | 0                   | 0                    |
| Caedibacter(100)                | Otu003323 | 0.0000778513040093422 | 0                    | 0                    | 0                   | 0                    |

|                        |           |                       |                      |                      |                     |                      |
|------------------------|-----------|-----------------------|----------------------|----------------------|---------------------|----------------------|
| Caedibacter(100)       | Otu003324 | 0                     | 0.00162459385153712  | 0                    | 0                   | 0                    |
| Pseudomonas(100)       | Otu003342 | 0                     | 0.000124968757810547 | 0                    | 0                   | 0                    |
| Lactobacillus(100)     | Otu003373 | 0                     | 0                    | 0                    | 0                   | 0.000110387459984546 |
| Lacibacter(100)        | Otu003389 | 0                     | 0                    | 0.000109075043630017 | 0                   | 0                    |
| Fluviicola(75)         | Otu003417 | 0                     | 0.00224943764058985  | 0                    | 0                   | 0                    |
| Pseudomonas(100)       | Otu003443 | 0                     | 0                    | 0                    | 0.00012482836100362 | 0                    |
| uncultured(100)        | Otu003448 | 0                     | 0                    | 0                    | 0.00012482836100362 | 0                    |
| Pseudochrobactrum(100) | Otu003456 | 0                     | 0                    | 0                    | 0.00012482836100362 | 0                    |
| Aquabacterium(100)     | Otu003458 | 0                     | 0.000124968757810547 | 0                    | 0                   | 0                    |
| unclassified(100)      | Otu003459 | 0                     | 0.000499875031242189 | 0                    | 0.00212208213706154 | 0                    |
| Brevundimonas(100)     | Otu003478 | 0                     | 0.000124968757810547 | 0                    | 0                   | 0                    |
| Brevundimonas(100)     | Otu003479 | 0                     | 0                    | 0                    | 0.00012482836100362 | 0                    |
| Caulobacter(75)        | Otu003481 | 0.000155702608018684  | 0                    | 0                    | 0                   | 0                    |
| unclassified(75)       | Otu003482 | 0.0000778513040093422 | 0                    | 0                    | 0                   | 0                    |
| unclassified(100)      | Otu003501 | 0                     | 0                    | 0                    | 0                   | 0.000110387459984546 |
| unclassified(100)      | Otu003525 | 0                     | 0                    | 0.000109075043630017 | 0                   | 0                    |
| Aureimonas(100)        | Otu003537 | 0                     | 0.000249937515621095 | 0                    | 0                   | 0.000220774919969092 |
| unclassified(100)      | Otu003543 | 0                     | 0                    | 0.000109075043630017 | 0                   | 0.000110387459984546 |
| unclassified(75)       | Otu003548 | 0                     | 0                    | 0                    | 0                   | 0.000551937299922729 |
| Novosphingobium(75)    | Otu003557 | 0.0000778513040093422 | 0                    | 0                    | 0                   | 0                    |
| unclassified(75)       | Otu003558 | 0                     | 0.000124968757810547 | 0                    | 0                   | 0                    |
| Chryseobacterium(100)  | Otu003560 | 0                     | 0                    | 0                    | 0.00012482836100362 | 0                    |
| unclassified(100)      | Otu003562 | 0                     | 0                    | 0.000109075043630017 | 0                   | 0                    |
| Bosea(100)             | Otu003566 | 0                     | 0                    | 0                    | 0                   | 0.000110387459984546 |
| Dysgonomonas(100)      | Otu003568 | 0                     | 0                    | 0.000109075043630017 | 0                   | 0                    |
| Sphingopyxis(100)      | Otu003571 | 0                     | 0                    | 0                    | 0.00012482836100362 | 0                    |
| Sphingobium(100)       | Otu003574 | 0.000155702608018684  | 0                    | 0                    | 0                   | 0                    |
| Sphingopyxis(100)      | Otu003587 | 0                     | 0.000374906273431642 | 0                    | 0                   | 0                    |
| Novosphingobium(100)   | Otu003588 | 0.0000778513040093422 | 0                    | 0                    | 0                   | 0                    |
| Chryseobacterium(100)  | Otu003590 | 0                     | 0.000124968757810547 | 0                    | 0                   | 0                    |
| unclassified(100)      | Otu003600 | 0.0000778513040093422 | 0                    | 0                    | 0                   | 0                    |
| Rhizobium(100)         | Otu003605 | 0                     | 0                    | 0                    | 0.00012482836100362 | 0                    |
| unclassified(100)      | Otu003620 | 0                     | 0                    | 0                    | 0.00012482836100362 | 0                    |

|                                 |           |                       |                      |                      |                     |                      |
|---------------------------------|-----------|-----------------------|----------------------|----------------------|---------------------|----------------------|
| unclassified(100)               | Otu003643 | 0                     | 0.000874781304673832 | 0                    | 0                   | 0                    |
| Devosia(100)                    | Otu003671 | 0                     | 0                    | 0                    | 0.00037448508301086 | 0                    |
| unclassified(100)               | Otu003679 | 0                     | 0.000749812546863284 | 0                    | 0                   | 0                    |
| Hydrotalea(100)                 | Otu003683 | 0.000155702608018684  | 0                    | 0                    | 0                   | 0                    |
| Terrimonas(100)                 | Otu003692 | 0                     | 0                    | 0                    | 0.00037448508301086 | 0                    |
| Flavobacterium(100)             | Otu003694 | 0                     | 0.000124968757810547 | 0                    | 0                   | 0                    |
| Flavobacterium(100)             | Otu003707 | 0                     | 0.000124968757810547 | 0                    | 0                   | 0                    |
| Chryseobacterium(100)           | Otu003716 | 0                     | 0.000124968757810547 | 0                    | 0                   | 0                    |
| Chryseobacterium(100)           | Otu003734 | 0                     | 0.000124968757810547 | 0                    | 0                   | 0                    |
| Coprococcus(100)                | Otu003764 | 0                     | 0                    | 0.000654450261780105 | 0                   | 0                    |
| uncultured_Roseobacter_sp.(100) | Otu003773 | 0                     | 0                    | 0                    | 0                   | 0.000551937299922729 |
| unclassified(100)               | Otu003843 | 0                     | 0.000249937515621095 | 0                    | 0                   | 0                    |
| Chryseobacterium(100)           | Otu003868 | 0                     | 0.000124968757810547 | 0                    | 0                   | 0                    |
| Aquabacterium(67)               | Otu003888 | 0                     | 0                    | 0                    | 0                   | 0.000110387459984546 |
| Halomonas(100)                  | Otu003901 | 0                     | 0.000374906273431642 | 0                    | 0                   | 0                    |
| Halomonas(100)                  | Otu003902 | 0                     | 0.000249937515621095 | 0                    | 0                   | 0                    |
| Dysgonomonas(100)               | Otu003922 | 0                     | 0                    | 0                    | 0                   | 0.000110387459984546 |
| Anaerobranca(100)               | Otu003943 | 0                     | 0.00112471882029493  | 0                    | 0                   | 0                    |
| Novosphingobium(100)            | Otu003946 | 0.0000778513040093422 | 0                    | 0                    | 0                   | 0                    |
| Rheinheimera(100)               | Otu003947 | 0                     | 0.000124968757810547 | 0                    | 0                   | 0                    |
| Dysgonomonas(100)               | Otu003979 | 0                     | 0                    | 0                    | 0.00012482836100362 | 0                    |
| Dysgonomonas(100)               | Otu004009 | 0                     | 0                    | 0                    | 0                   | 0.000110387459984546 |
| Dysgonomonas(100)               | Otu004024 | 0                     | 0.000124968757810547 | 0                    | 0                   | 0                    |
| unclassified(100)               | Otu004056 | 0                     | 0                    | 0                    | 0.00024965672200724 | 0                    |
| unclassified(100)               | Otu004068 | 0.0000778513040093422 | 0                    | 0                    | 0                   | 0                    |
| Aquabacterium(67)               | Otu004081 | 0                     | 0                    | 0                    | 0                   | 0.000110387459984546 |
| unclassified(100)               | Otu004162 | 0                     | 0.00112471882029493  | 0                    | 0                   | 0                    |
| unclassified(100)               | Otu004175 | 0                     | 0.000124968757810547 | 0                    | 0                   | 0                    |
| unclassified(67)                | Otu004192 | 0                     | 0                    | 0                    | 0                   | 0.000110387459984546 |
| unclassified(67)                | Otu004195 | 0                     | 0                    | 0                    | 0                   | 0.000110387459984546 |
| Simplicispira(100)              | Otu004197 | 0                     | 0                    | 0                    | 0                   | 0.000110387459984546 |
| Aquabacterium(100)              | Otu004201 | 0.0000778513040093422 | 0                    | 0                    | 0                   | 0                    |
| Pedobacter(100)                 | Otu004205 | 0                     | 0                    | 0.000109075043630017 | 0                   | 0                    |

|                       |           |                       |                      |                      |                     |                      |
|-----------------------|-----------|-----------------------|----------------------|----------------------|---------------------|----------------------|
| Chryseobacterium(100) | Otu004216 | 0                     | 0                    | 0                    | 0.00012482836100362 | 0                    |
| Sphingobacterium(100) | Otu004217 | 0                     | 0                    | 0                    | 0.00024965672200724 | 0                    |
| unclassified(100)     | Otu004226 | 0                     | 0                    | 0                    | 0.00012482836100362 | 0                    |
| Aquabacterium(100)    | Otu004270 | 0                     | 0                    | 0.000109075043630017 | 0                   | 0                    |
| Negativicoccus(100)   | Otu004271 | 0                     | 0.000749812546863284 | 0.000109075043630017 | 0                   | 0                    |
| Chryseobacterium(100) | Otu004274 | 0                     | 0                    | 0                    | 0                   | 0.000110387459984546 |
| Aquabacterium(67)     | Otu004286 | 0                     | 0                    | 0                    | 0                   | 0.000110387459984546 |
| unclassified(100)     | Otu004289 | 0                     | 0                    | 0                    | 0                   | 0.000110387459984546 |
| unclassified(100)     | Otu004316 | 0                     | 0                    | 0.000109075043630017 | 0                   | 0                    |
| Afipia(67)            | Otu004331 | 0.0000778513040093422 | 0                    | 0                    | 0                   | 0                    |
| Bradyrhizobium(100)   | Otu004332 | 0.0000778513040093422 | 0                    | 0                    | 0                   | 0                    |
| Dysgonomonas(100)     | Otu004376 | 0                     | 0                    | 0                    | 0                   | 0.000110387459984546 |
| Dysgonomonas(100)     | Otu004378 | 0                     | 0                    | 0.000109075043630017 | 0                   | 0                    |
| Novosphingobium(100)  | Otu004407 | 0.0000778513040093422 | 0                    | 0                    | 0                   | 0                    |
| uncultured(100)       | Otu004428 | 0                     | 0                    | 0                    | 0                   | 0.000220774919969092 |
| Legionella(100)       | Otu004440 | 0                     | 0                    | 0                    | 0.00037448508301086 | 0                    |
| Novosphingobium(67)   | Otu004452 | 0.0000778513040093422 | 0                    | 0                    | 0                   | 0                    |
| Novosphingobium(100)  | Otu004454 | 0                     | 0                    | 0                    | 0                   | 0.000110387459984546 |
| Novosphingobium(100)  | Otu004456 | 0.0000778513040093422 | 0                    | 0                    | 0                   | 0                    |
| Pseudomonas(100)      | Otu004477 | 0                     | 0                    | 0                    | 0                   | 0.000110387459984546 |
| Rhodobacter(67)       | Otu004505 | 0                     | 0                    | 0                    | 0.00012482836100362 | 0                    |
| Staphylococcus(100)   | Otu004519 | 0                     | 0.000124968757810547 | 0                    | 0                   | 0                    |
| Haematobacter(100)    | Otu004535 | 0                     | 0                    | 0                    | 0.00049931344401448 | 0                    |
| Paracoccus(100)       | Otu004539 | 0                     | 0.000124968757810547 | 0                    | 0                   | 0                    |
| Aureimonas(100)       | Otu004549 | 0                     | 0                    | 0                    | 0                   | 0.000993487139860912 |
| unclassified(100)     | Otu004559 | 0                     | 0.000124968757810547 | 0                    | 0                   | 0                    |
| unclassified(100)     | Otu004594 | 0                     | 0.000124968757810547 | 0                    | 0                   | 0                    |
| unclassified(100)     | Otu004607 | 0                     | 0                    | 0                    | 0.00012482836100362 | 0                    |
| unclassified(100)     | Otu004615 | 0                     | 0.000124968757810547 | 0                    | 0                   | 0                    |
| Bacteroides(100)      | Otu004717 | 0                     | 0                    | 0.00043630017452007  | 0                   | 0                    |
| unclassified(100)     | Otu004721 | 0                     | 0                    | 0                    | 0.00012482836100362 | 0                    |
| Salinicoccus(67)      | Otu004724 | 0                     | 0                    | 0                    | 0                   | 0.00110387459984546  |
| Methylobacterium(100) | Otu004784 | 0                     | 0                    | 0                    | 0.00074897016602172 | 0                    |

|                       |           |                       |                      |                      |                     |                      |
|-----------------------|-----------|-----------------------|----------------------|----------------------|---------------------|----------------------|
| Aeromonas(100)        | Otu004793 | 0                     | 0                    | 0                    | 0                   | 0.000110387459984546 |
| Aeromonas(100)        | Otu004800 | 0                     | 0                    | 0.000109075043630017 | 0                   | 0                    |
| unclassified(67)      | Otu004837 | 0.0000778513040093422 | 0                    | 0                    | 0                   | 0                    |
| unclassified(100)     | Otu004840 | 0                     | 0                    | 0                    | 0                   | 0.000110387459984546 |
| Aquabacterium(100)    | Otu004843 | 0.0000778513040093422 | 0                    | 0                    | 0                   | 0                    |
| unclassified(100)     | Otu004856 | 0.0000778513040093422 | 0                    | 0                    | 0                   | 0                    |
| Pseudomonas(100)      | Otu004890 | 0                     | 0                    | 0                    | 0                   | 0.000110387459984546 |
| Pseudomonas(67)       | Otu004903 | 0                     | 0                    | 0                    | 0                   | 0.000110387459984546 |
| Caulobacter(100)      | Otu004955 | 0.0000778513040093422 | 0                    | 0                    | 0                   | 0                    |
| Brevundimonas(100)    | Otu004957 | 0                     | 0                    | 0.000109075043630017 | 0                   | 0                    |
| Phenylobacterium(100) | Otu004961 | 0                     | 0.000124968757810547 | 0                    | 0                   | 0                    |
| uncultured(100)       | Otu004965 | 0                     | 0                    | 0                    | 0.00012482836100362 | 0                    |
| unclassified(100)     | Otu004982 | 0                     | 0                    | 0.000109075043630017 | 0                   | 0                    |
| unclassified(100)     | Otu004983 | 0                     | 0.000124968757810547 | 0                    | 0                   | 0                    |
| Pseudomonas(100)      | Otu004997 | 0                     | 0                    | 0.000109075043630017 | 0                   | 0                    |
| Brevundimonas(100)    | Otu005006 | 0                     | 0                    | 0                    | 0                   | 0.000110387459984546 |
| Caulobacter(67)       | Otu005013 | 0.0000778513040093422 | 0                    | 0                    | 0                   | 0                    |
| Defluviicoccus(100)   | Otu005014 | 0                     | 0                    | 0                    | 0                   | 0.00077271221989182  |
| Brevundimonas(100)    | Otu005021 | 0                     | 0                    | 0                    | 0                   | 0.000110387459984546 |
| Brevundimonas(100)    | Otu005023 | 0                     | 0                    | 0                    | 0                   | 0.000110387459984546 |
| unclassified(67)      | Otu005024 | 0.0000778513040093422 | 0                    | 0                    | 0                   | 0                    |
| Aquabacterium(100)    | Otu005032 | 0.0000778513040093422 | 0                    | 0                    | 0                   | 0                    |
| Aquabacterium(100)    | Otu005048 | 0                     | 0                    | 0                    | 0                   | 0.000110387459984546 |
| Aquabacterium(100)    | Otu005061 | 0                     | 0                    | 0.000109075043630017 | 0                   | 0                    |
| Aquabacterium(100)    | Otu005063 | 0                     | 0                    | 0.000109075043630017 | 0                   | 0                    |
| uncultured(100)       | Otu005164 | 0                     | 0                    | 0                    | 0                   | 0.000551937299922729 |
| unclassified(100)     | Otu005171 | 0.0000778513040093422 | 0                    | 0                    | 0                   | 0                    |
| unclassified(100)     | Otu005174 | 0                     | 0                    | 0.000327225130890052 | 0                   | 0                    |
| unclassified(100)     | Otu005185 | 0                     | 0.000749812546863284 | 0                    | 0                   | 0                    |
| Roseomonas(100)       | Otu005186 | 0                     | 0                    | 0                    | 0.0006241418050181  | 0                    |
| unclassified(100)     | Otu005204 | 0                     | 0                    | 0                    | 0                   | 0.000110387459984546 |
| Gluconobacter(100)    | Otu005227 | 0                     | 0                    | 0                    | 0                   | 0.000110387459984546 |
| Rhizobium(100)        | Otu005242 | 0                     | 0                    | 0                    | 0                   | 0.000110387459984546 |

|                       |           |                       |                      |                      |                     |                      |
|-----------------------|-----------|-----------------------|----------------------|----------------------|---------------------|----------------------|
| Roseomonas(100)       | Otu005251 | 0                     | 0                    | 0                    | 0.00074897016602172 | 0                    |
| Tanticharoenia(67)    | Otu005253 | 0                     | 0                    | 0                    | 0                   | 0.00231813665967546  |
| Incertae_Sedis(100)   | Otu005308 | 0                     | 0                    | 0                    | 0.0018724254150543  | 0                    |
| Hydrotalea(67)        | Otu005315 | 0.0000778513040093422 | 0                    | 0                    | 0                   | 0                    |
| Ferruginibacter(100)  | Otu005321 | 0                     | 0                    | 0.000218150087260035 | 0                   | 0                    |
| unclassified(100)     | Otu005324 | 0                     | 0.000124968757810547 | 0                    | 0                   | 0                    |
| unclassified(100)     | Otu005337 | 0                     | 0                    | 0                    | 0                   | 0.000110387459984546 |
| unclassified(100)     | Otu005339 | 0                     | 0                    | 0.000109075043630017 | 0                   | 0                    |
| Incertae_Sedis(100)   | Otu005346 | 0                     | 0                    | 0.000763525305410122 | 0                   | 0                    |
| Bacillus(67)          | Otu005356 | 0                     | 0                    | 0.00272687609075044  | 0                   | 0                    |
| unclassified(100)     | Otu005373 | 0.000155702608018684  | 0                    | 0                    | 0                   | 0                    |
| unclassified(100)     | Otu005376 | 0                     | 0                    | 0.000109075043630017 | 0                   | 0                    |
| unclassified(100)     | Otu005395 | 0.000155702608018684  | 0                    | 0                    | 0                   | 0                    |
| unclassified(100)     | Otu005408 | 0.0000778513040093422 | 0                    | 0                    | 0                   | 0                    |
| Enterococcus(100)     | Otu005442 | 0                     | 0                    | 0.000109075043630017 | 0                   | 0                    |
| unclassified(100)     | Otu005489 | 0                     | 0                    | 0                    | 0.00012482836100362 | 0                    |
| Adhaeribacter(100)    | Otu005503 | 0                     | 0                    | 0.00109075043630017  | 0                   | 0                    |
| unclassified(100)     | Otu005523 | 0                     | 0                    | 0                    | 0.00012482836100362 | 0                    |
| unclassified(100)     | Otu005619 | 0                     | 0                    | 0                    | 0                   | 0.000110387459984546 |
| unclassified(100)     | Otu005643 | 0                     | 0                    | 0                    | 0.00074897016602172 | 0                    |
| Hymenobacter(100)     | Otu005678 | 0                     | 0                    | 0                    | 0.00012482836100362 | 0                    |
| unclassified(100)     | Otu005712 | 0                     | 0                    | 0                    | 0                   | 0.000220774919969092 |
| Dysgonomonas(100)     | Otu005725 | 0                     | 0.000124968757810547 | 0                    | 0                   | 0                    |
| Dysgonomonas(100)     | Otu005737 | 0                     | 0                    | 0                    | 0                   | 0.000110387459984546 |
| Incertae_Sedis(100)   | Otu005835 | 0                     | 0                    | 0                    | 0                   | 0.000220774919969092 |
| Phenylobacterium(100) | Otu005850 | 0                     | 0                    | 0                    | 0.00012482836100362 | 0                    |
| unclassified          | Otu005855 | 0                     | 0                    | 0                    | 0.00012482836100362 | 0                    |
| Caulobacter(100)      | Otu005862 | 0.0000778513040093422 | 0                    | 0                    | 0                   | 0                    |
| Blastomonas(100)      | Otu005869 | 0.0000778513040093422 | 0                    | 0                    | 0                   | 0                    |
| unclassified(100)     | Otu005894 | 0                     | 0                    | 0                    | 0.00037448508301086 | 0                    |
| Aeromonas(100)        | Otu005914 | 0                     | 0                    | 0                    | 0                   | 0.000110387459984546 |
| Aeromonas(100)        | Otu005951 | 0                     | 0                    | 0                    | 0                   | 0.000110387459984546 |
| Defluviicoccus(100)   | Otu005966 | 0                     | 0                    | 0                    | 0.00037448508301086 | 0                    |

|                      |           |                       |                      |                      |                     |                      |
|----------------------|-----------|-----------------------|----------------------|----------------------|---------------------|----------------------|
| unclassified(100)    | Otu006006 | 0                     | 0.000499875031242189 | 0                    | 0                   | 0                    |
| unclassified(100)    | Otu006015 | 0.000155702608018684  | 0                    | 0                    | 0                   | 0                    |
| Novosphingobium(100) | Otu006047 | 0.0000778513040093422 | 0                    | 0                    | 0                   | 0                    |
| Sphingopyxis(100)    | Otu006068 | 0.0000778513040093422 | 0                    | 0                    | 0                   | 0                    |
| unclassified         | Otu006107 | 0                     | 0.000749812546863284 | 0                    | 0                   | 0                    |
| unclassified(100)    | Otu006124 | 0.0000778513040093422 | 0                    | 0                    | 0                   | 0                    |
| unclassified(100)    | Otu006127 | 0                     | 0                    | 0                    | 0                   | 0.000110387459984546 |
| unclassified(100)    | Otu006391 | 0                     | 0.000124968757810547 | 0                    | 0                   | 0                    |
| Fusobacterium(100)   | Otu006413 | 0                     | 0                    | 0                    | 0.00012482836100362 | 0                    |
| unclassified(100)    | Otu006416 | 0                     | 0                    | 0                    | 0.00012482836100362 | 0                    |
| unclassified(100)    | Otu006445 | 0.0000778513040093422 | 0                    | 0                    | 0                   | 0                    |
| unclassified(100)    | Otu006473 | 0                     | 0                    | 0                    | 0.00012482836100362 | 0                    |
| unclassified(100)    | Otu006490 | 0                     | 0                    | 0.000109075043630017 | 0                   | 0                    |
| Sphingobium(100)     | Otu006502 | 0.0000778513040093422 | 0                    | 0                    | 0                   | 0                    |
| unclassified(100)    | Otu006509 | 0                     | 0.000124968757810547 | 0                    | 0                   | 0                    |
| unclassified(100)    | Otu006516 | 0                     | 0                    | 0.000109075043630017 | 0                   | 0                    |
| unclassified(100)    | Otu006615 | 0                     | 0                    | 0                    | 0                   | 0.000110387459984546 |
| unclassified(100)    | Otu006632 | 0.0000778513040093422 | 0                    | 0                    | 0                   | 0                    |
| unclassified(100)    | Otu006635 | 0                     | 0                    | 0                    | 0                   | 0.000110387459984546 |
| unclassified(100)    | Otu006672 | 0.0000778513040093422 | 0                    | 0                    | 0                   | 0                    |
| unclassified(100)    | Otu006691 | 0                     | 0                    | 0                    | 0                   | 0.000110387459984546 |
| unclassified(100)    | Otu006692 | 0                     | 0.000124968757810547 | 0                    | 0                   | 0                    |
| unclassified(100)    | Otu006719 | 0                     | 0                    | 0                    | 0                   | 0.000110387459984546 |
| unclassified(100)    | Otu006767 | 0.0000778513040093422 | 0                    | 0                    | 0                   | 0                    |
| Pedobacter(100)      | Otu006773 | 0                     | 0.000124968757810547 | 0                    | 0                   | 0                    |
| Pedobacter(100)      | Otu006775 | 0                     | 0                    | 0                    | 0.00087379852702534 | 0                    |
| unclassified(100)    | Otu006801 | 0.0000778513040093422 | 0                    | 0                    | 0                   | 0                    |
| Cardiobacterium(100) | Otu006824 | 0                     | 0.000374906273431642 | 0                    | 0                   | 0                    |
| unclassified(100)    | Otu006861 | 0                     | 0.000124968757810547 | 0                    | 0                   | 0                    |
| unclassified(100)    | Otu006875 | 0.0000778513040093422 | 0                    | 0                    | 0                   | 0                    |
| unclassified(100)    | Otu006912 | 0                     | 0                    | 0                    | 0.00012482836100362 | 0                    |
| unclassified(100)    | Otu006996 | 0                     | 0                    | 0                    | 0.00012482836100362 | 0                    |
| unclassified(100)    | Otu007006 | 0.0000778513040093422 | 0                    | 0                    | 0                   | 0                    |



|                           |           |   |                      |                      |                     |                      |
|---------------------------|-----------|---|----------------------|----------------------|---------------------|----------------------|
| unclassified(100)         | Otu007010 | 0 | 0.000124968757810547 | 0.000109075043630017 | 0                   | 0                    |
| unclassified(100)         | Otu007012 | 0 | 0                    | 0                    | 0                   | 0.000110387459984546 |
| unclassified(100)         | Otu007039 | 0 | 0                    | 0                    | 0.00012482836100362 | 0                    |
| Dysgonomonas(100)         | Otu007074 | 0 | 0.000124968757810547 | 0                    | 0                   | 0                    |
| Dysgonomonas(100)         | Otu007092 | 0 | 0                    | 0.000109075043630017 | 0                   | 0                    |
| Dysgonomonas(100)         | Otu007100 | 0 | 0                    | 0                    | 0                   | 0.000110387459984546 |
| Dysgonomonas(100)         | Otu007134 | 0 | 0                    | 0                    | 0                   | 0.000110387459984546 |
| Dysgonomonas(100)         | Otu007152 | 0 | 0.000124968757810547 | 0                    | 0                   | 0                    |
| Dysgonomonas(100)         | Otu007182 | 0 | 0                    | 0.000109075043630017 | 0                   | 0                    |
| Dysgonomonas(100)         | Otu007205 | 0 | 0.000124968757810547 | 0                    | 0                   | 0                    |
| Dysgonomonas(100)         | Otu007229 | 0 | 0.000124968757810547 | 0                    | 0                   | 0                    |
| Dysgonomonas(100)         | Otu007251 | 0 | 0                    | 0                    | 0                   | 0.000110387459984546 |
| Dysgonomonas(100)         | Otu007257 | 0 | 0                    | 0.000109075043630017 | 0                   | 0                    |
| Dysgonomonas(100)         | Otu007267 | 0 | 0                    | 0                    | 0.00012482836100362 | 0                    |
| Dysgonomonas(100)         | Otu007281 | 0 | 0                    | 0                    | 0.00012482836100362 | 0                    |
| Dysgonomonas(100)         | Otu007314 | 0 | 0.000124968757810547 | 0                    | 0                   | 0                    |
| Dysgonomonas(100)         | Otu007317 | 0 | 0                    | 0                    | 0.00012482836100362 | 0                    |
| Dysgonomonas(100)         | Otu007333 | 0 | 0.000124968757810547 | 0                    | 0                   | 0                    |
| unclassified              | Otu007365 | 0 | 0                    | 0                    | 0.00012482836100362 | 0                    |
| Dysgonomonas(100)         | Otu007391 | 0 | 0                    | 0                    | 0.00012482836100362 | 0                    |
| Dysgonomonas(100)         | Otu007396 | 0 | 0                    | 0                    | 0.00012482836100362 | 0                    |
| Dysgonomonas(100)         | Otu007423 | 0 | 0                    | 0                    | 0.00012482836100362 | 0                    |
| Dysgonomonas(100)         | Otu007446 | 0 | 0.000124968757810547 | 0                    | 0                   | 0                    |
| Dysgonomonas(100)         | Otu007452 | 0 | 0                    | 0                    | 0.00012482836100362 | 0                    |
| unclassified(100)         | Otu007543 | 0 | 0                    | 0                    | 0.00012482836100362 | 0                    |
| Flavisolibacter(100)      | Otu007571 | 0 | 0                    | 0.00043630017452007  | 0                   | 0.000551937299922729 |
| Sphingomonas(100)         | Otu007577 | 0 | 0                    | 0                    | 0.00012482836100362 | 0                    |
| unclassified(100)         | Otu007597 | 0 | 0                    | 0.000109075043630017 | 0                   | 0                    |
| uncultured_bacterium(100) | Otu007609 | 0 | 0                    | 0                    | 0                   | 0.000551937299922729 |
| unclassified              | Otu007629 | 0 | 0                    | 0                    | 0                   | 0.000220774919969092 |
| unclassified(100)         | Otu007646 | 0 | 0                    | 0                    | 0.00012482836100362 | 0                    |
| unclassified(100)         | Otu007658 | 0 | 0                    | 0                    | 0                   | 0.000110387459984546 |
| unclassified(100)         | Otu007664 | 0 | 0                    | 0                    | 0                   | 0.000331162379953637 |

|                       |           |                       |                      |                      |                     |                      |
|-----------------------|-----------|-----------------------|----------------------|----------------------|---------------------|----------------------|
| unclassified(100)     | Otu007667 | 0.0000778513040093422 | 0                    | 0                    | 0                   | 0                    |
| unclassified          | Otu007668 | 0                     | 0                    | 0                    | 0.00099862688802896 | 0                    |
| unclassified          | Otu007707 | 0.0000778513040093422 | 0                    | 0                    | 0                   | 0                    |
| unclassified(100)     | Otu007726 | 0.000155702608018684  | 0                    | 0                    | 0                   | 0                    |
| unclassified(100)     | Otu007760 | 0                     | 0                    | 0.000218150087260035 | 0                   | 0                    |
| unclassified(100)     | Otu007811 | 0.0000778513040093422 | 0                    | 0                    | 0                   | 0                    |
| unclassified(100)     | Otu007820 | 0.0000778513040093422 | 0                    | 0                    | 0                   | 0                    |
| Dysgonomonas(100)     | Otu007835 | 0                     | 0.000124968757810547 | 0                    | 0                   | 0                    |
| Dysgonomonas(100)     | Otu007838 | 0                     | 0                    | 0                    | 0                   | 0.000110387459984546 |
| unclassified(100)     | Otu007844 | 0                     | 0                    | 0                    | 0                   | 0.000110387459984546 |
| unclassified(100)     | Otu007847 | 0.0000778513040093422 | 0                    | 0                    | 0                   | 0                    |
| unclassified(100)     | Otu007853 | 0.0000778513040093422 | 0                    | 0                    | 0                   | 0                    |
| Legionella(100)       | Otu007859 | 0                     | 0.000124968757810547 | 0                    | 0                   | 0                    |
| Streptococcus(100)    | Otu007871 | 0                     | 0                    | 0                    | 0.00012482836100362 | 0                    |
| unclassified(100)     | Otu007909 | 0                     | 0                    | 0                    | 0.00012482836100362 | 0                    |
| unclassified(100)     | Otu007934 | 0                     | 0                    | 0                    | 0                   | 0.000110387459984546 |
| unclassified(100)     | Otu007941 | 0.0000778513040093422 | 0                    | 0                    | 0                   | 0                    |
| unclassified(100)     | Otu007952 | 0                     | 0                    | 0                    | 0                   | 0.000110387459984546 |
| unclassified(100)     | Otu007962 | 0.0000778513040093422 | 0                    | 0                    | 0                   | 0                    |
| Chryseobacterium(100) | Otu007987 | 0                     | 0.000124968757810547 | 0                    | 0                   | 0                    |
| unclassified(100)     | Otu007999 | 0                     | 0                    | 0                    | 0                   | 0.000110387459984546 |
| unclassified(100)     | Otu008066 | 0                     | 0.000999750062484379 | 0                    | 0                   | 0                    |
| Bdellovibrio(100)     | Otu008091 | 0                     | 0                    | 0                    | 0                   | 0.000110387459984546 |
| unclassified(100)     | Otu008187 | 0                     | 0                    | 0                    | 0.00012482836100362 | 0                    |
| Pseudomonas(100)      | Otu008247 | 0                     | 0                    | 0                    | 0.00012482836100362 | 0                    |
| unclassified(100)     | Otu008259 | 0                     | 0                    | 0                    | 0.0006241418050181  | 0                    |
| Nevskia(100)          | Otu008296 | 0                     | 0                    | 0.000109075043630017 | 0                   | 0                    |
| unclassified(100)     | Otu008319 | 0                     | 0                    | 0.000109075043630017 | 0                   | 0                    |
| Pseudomonas(100)      | Otu008375 | 0                     | 0                    | 0                    | 0.00012482836100362 | 0                    |
| Pseudomonas(100)      | Otu008433 | 0                     | 0                    | 0                    | 0.00012482836100362 | 0                    |
| unclassified(100)     | Otu008479 | 0.0000778513040093422 | 0                    | 0                    | 0                   | 0                    |
| Johnsonella(100)      | Otu008486 | 0                     | 0                    | 0                    | 0                   | 0.000662324759907275 |
| unclassified(100)     | Otu008528 | 0.0000778513040093422 | 0                    | 0                    | 0                   | 0                    |

|                    |           |                       |                      |                      |                     |                      |
|--------------------|-----------|-----------------------|----------------------|----------------------|---------------------|----------------------|
| unclassified(100)  | Otu008532 | 0                     | 0                    | 0                    | 0.00099862688802896 | 0                    |
| unclassified(100)  | Otu008534 | 0.0000778513040093422 | 0                    | 0                    | 0                   | 0                    |
| unclassified(100)  | Otu008683 | 0.0000778513040093422 | 0                    | 0                    | 0                   | 0                    |
| unclassified       | Otu008721 | 0                     | 0                    | 0                    | 0                   | 0.000110387459984546 |
| unclassified(100)  | Otu008722 | 0                     | 0.000249937515621095 | 0                    | 0                   | 0                    |
| unclassified(100)  | Otu008727 | 0                     | 0                    | 0                    | 0                   | 0.00132464951981455  |
| unclassified(100)  | Otu008737 | 0                     | 0                    | 0                    | 0.00237173885906878 | 0.00342201125952092  |
| Craurococcus(100)  | Otu008755 | 0                     | 0                    | 0                    | 0                   | 0.000662324759907275 |
| unclassified       | Otu008760 | 0                     | 0                    | 0                    | 0.00012482836100362 | 0                    |
| Gluconobacter(100) | Otu008778 | 0                     | 0                    | 0                    | 0                   | 0.000110387459984546 |
| Craurococcus(100)  | Otu008780 | 0                     | 0                    | 0                    | 0.00012482836100362 | 0                    |
| Gluconobacter(100) | Otu008857 | 0                     | 0                    | 0                    | 0                   | 0.000110387459984546 |
| unclassified(100)  | Otu008950 | 0                     | 0                    | 0                    | 0.00012482836100362 | 0                    |
| Pseudomonas(100)   | Otu009235 | 0                     | 0.000124968757810547 | 0                    | 0                   | 0                    |
| unclassified       | Otu009382 | 0                     | 0                    | 0                    | 0                   | 0.000110387459984546 |
| Pseudomonas(100)   | Otu009405 | 0                     | 0                    | 0.00043630017452007  | 0                   | 0                    |
| Pseudomonas(100)   | Otu009438 | 0                     | 0                    | 0                    | 0.00012482836100362 | 0                    |
| unclassified(100)  | Otu009489 | 0                     | 0.000124968757810547 | 0                    | 0                   | 0                    |
| unclassified(100)  | Otu009507 | 0                     | 0                    | 0                    | 0.00012482836100362 | 0                    |
| unclassified(100)  | Otu009537 | 0                     | 0                    | 0                    | 0                   | 0.000110387459984546 |
| unclassified(100)  | Otu009544 | 0                     | 0                    | 0                    | 0                   | 0.000110387459984546 |
| unclassified(100)  | Otu009547 | 0                     | 0                    | 0                    | 0.00012482836100362 | 0                    |
| Phaselicystis(100) | Otu009556 | 0                     | 0                    | 0.000109075043630017 | 0                   | 0                    |
| unclassified(100)  | Otu009569 | 0                     | 0.000124968757810547 | 0                    | 0                   | 0                    |
| unclassified(100)  | Otu009580 | 0                     | 0                    | 0                    | 0                   | 0.000110387459984546 |
| unclassified(100)  | Otu009582 | 0                     | 0                    | 0                    | 0.00012482836100362 | 0                    |
| unclassified(100)  | Otu009590 | 0                     | 0.000124968757810547 | 0                    | 0                   | 0                    |
| unclassified(100)  | Otu009608 | 0                     | 0                    | 0.000109075043630017 | 0                   | 0                    |
| unclassified(100)  | Otu009613 | 0                     | 0.000124968757810547 | 0                    | 0                   | 0                    |
| unclassified(100)  | Otu009622 | 0                     | 0.000124968757810547 | 0.000109075043630017 | 0                   | 0                    |
| unclassified(100)  | Otu009655 | 0                     | 0                    | 0                    | 0                   | 0.000331162379953637 |
| unclassified(100)  | Otu009797 | 0                     | 0                    | 0                    | 0.00112345524903258 | 0                    |
| unclassified(100)  | Otu009798 | 0.0000778513040093422 | 0                    | 0                    | 0                   | 0                    |

|                                    |           |                       |                      |                      |                     |                      |
|------------------------------------|-----------|-----------------------|----------------------|----------------------|---------------------|----------------------|
| unclassified(100)                  | Otu009800 | 0                     | 0                    | 0.000109075043630017 | 0                   | 0                    |
| unclassified(100)                  | Otu009845 | 0.0000778513040093422 | 0                    | 0                    | 0                   | 0                    |
| Pseudomonas(100)                   | Otu009887 | 0                     | 0                    | 0                    | 0.00012482836100362 | 0                    |
| Pseudomonas(100)                   | Otu009891 | 0                     | 0.000124968757810547 | 0                    | 0                   | 0                    |
| unclassified(100)                  | Otu009946 | 0.000155702608018684  | 0                    | 0                    | 0                   | 0                    |
| Novosphingobium(100)               | Otu009979 | 0.0000778513040093422 | 0                    | 0                    | 0                   | 0                    |
| Prevotella(100)                    | Otu009991 | 0.0000778513040093422 | 0                    | 0                    | 0                   | 0                    |
| Prevotella(100)                    | Otu009998 | 0                     | 0                    | 0.000109075043630017 | 0                   | 0                    |
| unclassified(100)                  | Otu010008 | 0                     | 0                    | 0                    | 0                   | 0.000331162379953637 |
| Chryseobacterium(100)              | Otu010045 | 0                     | 0                    | 0                    | 0.00012482836100362 | 0                    |
| Candidatus_Rhodothymelaeaceae(100) | Otu010056 | 0                     | 0                    | 0.000654450261780105 | 0                   | 0                    |
| Flavobacterium(100)                | Otu010061 | 0                     | 0                    | 0                    | 0                   | 0.000220774919969092 |
| unclassified(100)                  | Otu010078 | 0                     | 0                    | 0                    | 0                   | 0.000110387459984546 |
| unclassified(100)                  | Otu010084 | 0                     | 0                    | 0                    | 0                   | 0.000110387459984546 |
| unclassified(100)                  | Otu010087 | 0                     | 0                    | 0                    | 0                   | 0.000110387459984546 |
| unclassified                       | Otu010092 | 0                     | 0                    | 0.000109075043630017 | 0                   | 0                    |
| Aquabacterium(100)                 | Otu010104 | 0                     | 0                    | 0                    | 0                   | 0.000110387459984546 |
| unclassified(100)                  | Otu010105 | 0                     | 0                    | 0.000109075043630017 | 0                   | 0                    |
| unclassified(100)                  | Otu010107 | 0                     | 0                    | 0                    | 0                   | 0.000110387459984546 |
| Rhizobacter(100)                   | Otu010108 | 0                     | 0                    | 0.000109075043630017 | 0                   | 0                    |
| Aquabacterium(100)                 | Otu010133 | 0                     | 0                    | 0.000109075043630017 | 0                   | 0                    |
| unclassified                       | Otu010148 | 0                     | 0                    | 0                    | 0                   | 0.000110387459984546 |
| unclassified                       | Otu010158 | 0.0000778513040093422 | 0                    | 0                    | 0                   | 0                    |
| Novosphingobium(100)               | Otu010160 | 0.0000778513040093422 | 0                    | 0                    | 0                   | 0                    |
| unclassified(100)                  | Otu010169 | 0.0000778513040093422 | 0                    | 0.000109075043630017 | 0                   | 0                    |
| unclassified(100)                  | Otu010185 | 0.0000778513040093422 | 0                    | 0                    | 0                   | 0                    |
| Aquabacterium(100)                 | Otu010187 | 0                     | 0                    | 0.000109075043630017 | 0                   | 0                    |
| unclassified(100)                  | Otu010189 | 0                     | 0.000124968757810547 | 0                    | 0                   | 0                    |
| unclassified                       | Otu010201 | 0.0000778513040093422 | 0                    | 0                    | 0                   | 0                    |
| Flavobacterium(100)                | Otu010203 | 0                     | 0                    | 0                    | 0.0006241418050181  | 0                    |
| Marinobacter(100)                  | Otu010218 | 0                     | 0                    | 0                    | 0                   | 0.00132464951981455  |
| Rheinheimera(100)                  | Otu010278 | 0                     | 0                    | 0                    | 0.0006241418050181  | 0                    |
| unclassified(100)                  | Otu010300 | 0                     | 0                    | 0                    | 0                   | 0.000110387459984546 |

|                     |           |                       |                      |                      |   |                      |
|---------------------|-----------|-----------------------|----------------------|----------------------|---|----------------------|
| unclassified(100)   | Otu010303 | 0                     | 0                    | 0.000218150087260035 | 0 | 0                    |
| unclassified(100)   | Otu010355 | 0                     | 0                    | 0                    | 0 | 0.000551937299922729 |
| unclassified        | Otu010401 | 0.0000778513040093422 | 0                    | 0                    | 0 | 0                    |
| unclassified(100)   | Otu010402 | 0                     | 0                    | 0                    | 0 | 0.000110387459984546 |
| Flavobacterium(100) | Otu010410 | 0                     | 0.000124968757810547 | 0                    | 0 | 0                    |
| unclassified(100)   | Otu010448 | 0                     | 0                    | 0                    | 0 | 0.000110387459984546 |
| unclassified        | Otu010505 | 0                     | 0                    | 0                    | 0 | 0.000110387459984546 |
| unclassified(100)   | Otu010509 | 0                     | 0                    | 0.000109075043630017 | 0 | 0                    |
| Aquabacterium(100)  | Otu010518 | 0.0000778513040093422 | 0                    | 0                    | 0 | 0                    |
| unclassified(100)   | Otu010558 | 0                     | 0.000124968757810547 | 0                    | 0 | 0                    |
| unclassified(100)   | Otu010559 | 0                     | 0                    | 0                    | 0 | 0.000110387459984546 |
| Brevundimonas(100)  | Otu010592 | 0                     | 0                    | 0                    | 0 | 0.000110387459984546 |
| Caulobacter(100)    | Otu010603 | 0.0000778513040093422 | 0                    | 0                    | 0 | 0                    |
| Brevundimonas(100)  | Otu010610 | 0                     | 0                    | 0                    | 0 | 0.000110387459984546 |
| unclassified(100)   | Otu010611 | 0                     | 0.000124968757810547 | 0                    | 0 | 0                    |
| unclassified(100)   | Otu010660 | 0.0000778513040093422 | 0                    | 0                    | 0 | 0                    |
| unclassified        | Otu010684 | 0                     | 0                    | 0                    | 0 | 0.000110387459984546 |
| unclassified(100)   | Otu010712 | 0                     | 0                    | 0.000109075043630017 | 0 | 0                    |
| Staphylococcus(100) | Otu010734 | 0                     | 0.000124968757810547 | 0                    | 0 | 0                    |
| unclassified        | Otu010777 | 0                     | 0                    | 0                    | 0 | 0.000110387459984546 |
| Aquabacterium(100)  | Otu010781 | 0                     | 0                    | 0                    | 0 | 0.000110387459984546 |
| Aquabacterium(100)  | Otu010801 | 0                     | 0                    | 0.000109075043630017 | 0 | 0                    |
| unclassified(100)   | Otu010815 | 0                     | 0                    | 0                    | 0 | 0.000110387459984546 |
| unclassified        | Otu010818 | 0                     | 0                    | 0                    | 0 | 0.000110387459984546 |
| Aquabacterium(100)  | Otu010824 | 0.0000778513040093422 | 0                    | 0                    | 0 | 0                    |
| unclassified(100)   | Otu010832 | 0.0000778513040093422 | 0                    | 0                    | 0 | 0                    |
| Rhizobacter(100)    | Otu010855 | 0.0000778513040093422 | 0                    | 0                    | 0 | 0                    |
| Aquabacterium(100)  | Otu010868 | 0                     | 0                    | 0                    | 0 | 0.000110387459984546 |
| unclassified        | Otu010871 | 0                     | 0                    | 0                    | 0 | 0.000110387459984546 |
| unclassified(100)   | Otu010907 | 0                     | 0                    | 0.000109075043630017 | 0 | 0                    |
| Aquabacterium(100)  | Otu010909 | 0                     | 0                    | 0.000109075043630017 | 0 | 0                    |
| unclassified(100)   | Otu010914 | 0                     | 0.000124968757810547 | 0                    | 0 | 0.000110387459984546 |
| unclassified(100)   | Otu010915 | 0                     | 0                    | 0                    | 0 | 0.000110387459984546 |

|                       |           |                       |                      |                      |                     |                      |
|-----------------------|-----------|-----------------------|----------------------|----------------------|---------------------|----------------------|
| unclassified          | Otu010917 | 0                     | 0                    | 0.000109075043630017 | 0                   | 0                    |
| unclassified          | Otu010920 | 0                     | 0                    | 0                    | 0                   | 0.000110387459984546 |
| unclassified(100)     | Otu010936 | 0                     | 0.000124968757810547 | 0                    | 0                   | 0                    |
| unclassified(100)     | Otu011028 | 0                     | 0                    | 0                    | 0                   | 0.000110387459984546 |
| Acinetobacter(100)    | Otu011072 | 0                     | 0                    | 0.000109075043630017 | 0                   | 0                    |
| Acinetobacter(100)    | Otu011073 | 0                     | 0.000124968757810547 | 0                    | 0                   | 0                    |
| unclassified(100)     | Otu011113 | 0                     | 0                    | 0                    | 0.00074897016602172 | 0                    |
| Flavobacterium(100)   | Otu011148 | 0                     | 0                    | 0.000109075043630017 | 0                   | 0                    |
| unclassified(100)     | Otu011173 | 0                     | 0.000124968757810547 | 0                    | 0                   | 0                    |
| unclassified(100)     | Otu011193 | 0.0000778513040093422 | 0                    | 0                    | 0                   | 0                    |
| unclassified(100)     | Otu011230 | 0                     | 0                    | 0.000109075043630017 | 0                   | 0                    |
| unclassified(100)     | Otu011233 | 0                     | 0                    | 0.000109075043630017 | 0                   | 0                    |
| unclassified(100)     | Otu011325 | 0                     | 0                    | 0.000654450261780105 | 0                   | 0                    |
| unclassified(100)     | Otu011361 | 0                     | 0                    | 0                    | 0.00012482836100362 | 0                    |
| unclassified(100)     | Otu011362 | 0                     | 0                    | 0                    | 0.00012482836100362 | 0                    |
| Chryseobacterium(100) | Otu011440 | 0                     | 0                    | 0.000109075043630017 | 0                   | 0                    |
| Methylobacterium(100) | Otu011451 | 0                     | 0                    | 0                    | 0                   | 0.000110387459984546 |
| Methylobacterium(100) | Otu011459 | 0                     | 0                    | 0                    | 0                   | 0.000110387459984546 |
| Chryseobacterium(100) | Otu011477 | 0                     | 0                    | 0                    | 0                   | 0.000110387459984546 |
| Chryseobacterium(100) | Otu011516 | 0                     | 0                    | 0.000109075043630017 | 0                   | 0                    |
| unclassified(100)     | Otu011522 | 0                     | 0.000124968757810547 | 0                    | 0                   | 0                    |
| Chryseobacterium(100) | Otu011527 | 0                     | 0                    | 0.000327225130890052 | 0                   | 0                    |
| Bergeyella(100)       | Otu011538 | 0                     | 0                    | 0                    | 0.00012482836100362 | 0                    |
| Fluviicola(100)       | Otu011600 | 0                     | 0.000124968757810547 | 0                    | 0                   | 0                    |
| Chryseobacterium(100) | Otu011641 | 0                     | 0                    | 0.000109075043630017 | 0                   | 0                    |
| unclassified          | Otu011718 | 0                     | 0.000124968757810547 | 0                    | 0                   | 0                    |
| Acinetobacter(100)    | Otu011740 | 0                     | 0.000124968757810547 | 0                    | 0                   | 0                    |
| Acinetobacter(100)    | Otu011755 | 0                     | 0                    | 0                    | 0                   | 0.000110387459984546 |
| Perlucidibaca(100)    | Otu011773 | 0.000155702608018684  | 0                    | 0                    | 0                   | 0                    |
| Rhizobium(100)        | Otu011796 | 0                     | 0                    | 0                    | 0.00012482836100362 | 0                    |
| Rhizobium(100)        | Otu011811 | 0                     | 0.000124968757810547 | 0                    | 0                   | 0                    |
| unclassified(100)     | Otu011849 | 0                     | 0                    | 0                    | 0.00012482836100362 | 0                    |
| unclassified(100)     | Otu011850 | 0                     | 0                    | 0                    | 0.00012482836100362 | 0                    |

|                    |           |                       |                      |                      |   |                      |
|--------------------|-----------|-----------------------|----------------------|----------------------|---|----------------------|
| Aquicella(100)     | Otu011891 | 0                     | 0                    | 0                    | 0 | 0.000110387459984546 |
| Dysgonomonas(100)  | Otu013332 | 0                     | 0.000124968757810547 | 0                    | 0 | 0                    |
| Dysgonomonas(100)  | Otu013358 | 0                     | 0.000124968757810547 | 0                    | 0 | 0                    |
| Dysgonomonas(100)  | Otu013369 | 0                     | 0.000124968757810547 | 0                    | 0 | 0                    |
| Dysgonomonas(100)  | Otu013370 | 0                     | 0.000124968757810547 | 0                    | 0 | 0                    |
| Dysgonomonas(100)  | Otu014327 | 0                     | 0.000124968757810547 | 0                    | 0 | 0                    |
| Dysgonomonas(100)  | Otu014437 | 0                     | 0.000124968757810547 | 0                    | 0 | 0                    |
| Dysgonomonas(100)  | Otu014440 | 0                     | 0.000124968757810547 | 0                    | 0 | 0                    |
| Dysgonomonas(100)  | Otu014441 | 0                     | 0.000124968757810547 | 0                    | 0 | 0                    |
| Dysgonomonas(100)  | Otu014448 | 0.0000778513040093422 | 0                    | 0                    | 0 | 0                    |
| Dysgonomonas(100)  | Otu014451 | 0                     | 0.000124968757810547 | 0                    | 0 | 0                    |
| Dysgonomonas(100)  | Otu014461 | 0                     | 0.000124968757810547 | 0                    | 0 | 0                    |
| Dysgonomonas(100)  | Otu014584 | 0                     | 0.000124968757810547 | 0                    | 0 | 0                    |
| Dysgonomonas(100)  | Otu014942 | 0.0000778513040093422 | 0                    | 0                    | 0 | 0                    |
| Dysgonomonas(100)  | Otu014968 | 0                     | 0.000124968757810547 | 0                    | 0 | 0                    |
| Dysgonomonas(100)  | Otu015022 | 0                     | 0.000124968757810547 | 0                    | 0 | 0                    |
| Dysgonomonas(100)  | Otu015025 | 0                     | 0.000124968757810547 | 0                    | 0 | 0                    |
| Porphyromonas(100) | Otu015044 | 0                     | 0                    | 0.000218150087260035 | 0 | 0                    |
| Dysgonomonas(100)  | Otu015076 | 0                     | 0.000124968757810547 | 0                    | 0 | 0                    |
| Dysgonomonas(100)  | Otu015082 | 0                     | 0.000124968757810547 | 0                    | 0 | 0                    |
| Dysgonomonas(100)  | Otu015086 | 0                     | 0.000124968757810547 | 0                    | 0 | 0                    |
| Dysgonomonas(100)  | Otu015092 | 0                     | 0.000124968757810547 | 0                    | 0 | 0                    |
| Dysgonomonas(100)  | Otu015131 | 0                     | 0.000124968757810547 | 0                    | 0 | 0                    |
| Dysgonomonas(100)  | Otu015138 | 0                     | 0.000124968757810547 | 0                    | 0 | 0                    |
| Dysgonomonas(100)  | Otu015169 | 0                     | 0.000124968757810547 | 0                    | 0 | 0                    |
| Dysgonomonas(100)  | Otu015177 | 0                     | 0.000124968757810547 | 0                    | 0 | 0                    |
| Dysgonomonas(100)  | Otu015190 | 0                     | 0.000124968757810547 | 0                    | 0 | 0                    |
| Dysgonomonas(100)  | Otu015205 | 0                     | 0.000124968757810547 | 0                    | 0 | 0                    |
| Dysgonomonas(100)  | Otu015215 | 0                     | 0.000124968757810547 | 0                    | 0 | 0                    |
| Dysgonomonas(100)  | Otu015241 | 0                     | 0.000124968757810547 | 0                    | 0 | 0                    |
| Dysgonomonas(100)  | Otu015265 | 0                     | 0.000124968757810547 | 0                    | 0 | 0                    |
| Dysgonomonas(100)  | Otu015269 | 0                     | 0.000124968757810547 | 0                    | 0 | 0                    |
| Dysgonomonas(100)  | Otu015279 | 0                     | 0.000124968757810547 | 0                    | 0 | 0                    |

|                   |           |   |                      |   |   |   |
|-------------------|-----------|---|----------------------|---|---|---|
| Dysgonomonas(100) | Otu015280 | 0 | 0.000124968757810547 | 0 | 0 | 0 |
| Dysgonomonas(100) | Otu015281 | 0 | 0.000124968757810547 | 0 | 0 | 0 |
| Dysgonomonas(100) | Otu015284 | 0 | 0.000124968757810547 | 0 | 0 | 0 |
| Dysgonomonas(100) | Otu015288 | 0 | 0.000124968757810547 | 0 | 0 | 0 |
| Dysgonomonas(100) | Otu015320 | 0 | 0.000124968757810547 | 0 | 0 | 0 |
| Dysgonomonas(100) | Otu015329 | 0 | 0.000124968757810547 | 0 | 0 | 0 |
| Dysgonomonas(100) | Otu015333 | 0 | 0.000124968757810547 | 0 | 0 | 0 |
| Dysgonomonas(100) | Otu015362 | 0 | 0.000124968757810547 | 0 | 0 | 0 |
| Dysgonomonas(100) | Otu015378 | 0 | 0.000124968757810547 | 0 | 0 | 0 |
| Dysgonomonas(100) | Otu015379 | 0 | 0.000124968757810547 | 0 | 0 | 0 |
| Dysgonomonas(100) | Otu015390 | 0 | 0.000124968757810547 | 0 | 0 | 0 |
| Dysgonomonas(100) | Otu015393 | 0 | 0.000124968757810547 | 0 | 0 | 0 |
| Dysgonomonas(100) | Otu015403 | 0 | 0.000124968757810547 | 0 | 0 | 0 |
| Dysgonomonas(100) | Otu015411 | 0 | 0.000124968757810547 | 0 | 0 | 0 |
| Dysgonomonas(100) | Otu015420 | 0 | 0.000124968757810547 | 0 | 0 | 0 |
| Dysgonomonas(100) | Otu015461 | 0 | 0.000124968757810547 | 0 | 0 | 0 |
| Dysgonomonas(100) | Otu015464 | 0 | 0.000124968757810547 | 0 | 0 | 0 |
| Dysgonomonas(100) | Otu015468 | 0 | 0.000124968757810547 | 0 | 0 | 0 |
| Dysgonomonas(100) | Otu015483 | 0 | 0.000124968757810547 | 0 | 0 | 0 |
| Dysgonomonas(100) | Otu015490 | 0 | 0.000124968757810547 | 0 | 0 | 0 |
| Dysgonomonas(100) | Otu015501 | 0 | 0.000124968757810547 | 0 | 0 | 0 |
| Dysgonomonas(100) | Otu015511 | 0 | 0.000124968757810547 | 0 | 0 | 0 |
| Dysgonomonas(100) | Otu015525 | 0 | 0.000124968757810547 | 0 | 0 | 0 |
| Dysgonomonas(100) | Otu015532 | 0 | 0.000124968757810547 | 0 | 0 | 0 |
| Dysgonomonas(100) | Otu015545 | 0 | 0.000124968757810547 | 0 | 0 | 0 |
| Dysgonomonas(100) | Otu015546 | 0 | 0.000124968757810547 | 0 | 0 | 0 |
| Dysgonomonas(100) | Otu015577 | 0 | 0.000124968757810547 | 0 | 0 | 0 |
| Dysgonomonas(100) | Otu015579 | 0 | 0.000124968757810547 | 0 | 0 | 0 |
| Dysgonomonas(100) | Otu015592 | 0 | 0.000124968757810547 | 0 | 0 | 0 |
| Dysgonomonas(100) | Otu015594 | 0 | 0.000124968757810547 | 0 | 0 | 0 |
| Dysgonomonas(100) | Otu015595 | 0 | 0.000124968757810547 | 0 | 0 | 0 |
| Dysgonomonas(100) | Otu015606 | 0 | 0.000124968757810547 | 0 | 0 | 0 |
| Dysgonomonas(100) | Otu015608 | 0 | 0.000124968757810547 | 0 | 0 | 0 |



|                   |           |   |                      |   |   |                      |
|-------------------|-----------|---|----------------------|---|---|----------------------|
| Dysgonomonas(100) | Otu015611 | 0 | 0.000124968757810547 | 0 | 0 | 0                    |
| Dysgonomonas(100) | Otu015615 | 0 | 0.000124968757810547 | 0 | 0 | 0                    |
| Dysgonomonas(100) | Otu015617 | 0 | 0.000124968757810547 | 0 | 0 | 0                    |
| Dysgonomonas(100) | Otu015620 | 0 | 0.000124968757810547 | 0 | 0 | 0                    |
| Dysgonomonas(100) | Otu015628 | 0 | 0.000124968757810547 | 0 | 0 | 0                    |
| Dysgonomonas(100) | Otu015631 | 0 | 0.000124968757810547 | 0 | 0 | 0                    |
| Dysgonomonas(100) | Otu015640 | 0 | 0.000124968757810547 | 0 | 0 | 0                    |
| Dysgonomonas(100) | Otu015642 | 0 | 0.000124968757810547 | 0 | 0 | 0                    |
| Dysgonomonas(100) | Otu015650 | 0 | 0.000124968757810547 | 0 | 0 | 0                    |
| Dysgonomonas(100) | Otu015657 | 0 | 0.000124968757810547 | 0 | 0 | 0                    |
| unclassified(100) | Otu015664 | 0 | 0.000124968757810547 | 0 | 0 | 0                    |
| Dysgonomonas(100) | Otu015673 | 0 | 0.000124968757810547 | 0 | 0 | 0                    |
| Dysgonomonas(100) | Otu015717 | 0 | 0.000124968757810547 | 0 | 0 | 0                    |
| Dysgonomonas(100) | Otu015724 | 0 | 0.000124968757810547 | 0 | 0 | 0                    |
| Dysgonomonas(100) | Otu015744 | 0 | 0.000124968757810547 | 0 | 0 | 0                    |
| Dysgonomonas(100) | Otu015749 | 0 | 0.000124968757810547 | 0 | 0 | 0                    |
| Dysgonomonas(100) | Otu015764 | 0 | 0.000124968757810547 | 0 | 0 | 0                    |
| Dysgonomonas(100) | Otu015765 | 0 | 0.000124968757810547 | 0 | 0 | 0                    |
| Dysgonomonas(100) | Otu015767 | 0 | 0.000124968757810547 | 0 | 0 | 0                    |
| Dysgonomonas(100) | Otu015782 | 0 | 0.000124968757810547 | 0 | 0 | 0                    |
| unclassified(100) | Otu016330 | 0 | 0                    | 0 | 0 | 0.000110387459984546 |
| unclassified(100) | Otu016335 | 0 | 0                    | 0 | 0 | 0.000110387459984546 |
| unclassified(100) | Otu016337 | 0 | 0                    | 0 | 0 | 0.000110387459984546 |
| unclassified(100) | Otu016339 | 0 | 0                    | 0 | 0 | 0.000110387459984546 |
| unclassified(100) | Otu016341 | 0 | 0                    | 0 | 0 | 0.000110387459984546 |
| unclassified(100) | Otu016344 | 0 | 0                    | 0 | 0 | 0.000110387459984546 |
| unclassified(100) | Otu016347 | 0 | 0                    | 0 | 0 | 0.000110387459984546 |
| unclassified(100) | Otu016350 | 0 | 0                    | 0 | 0 | 0.000110387459984546 |
| unclassified(100) | Otu016356 | 0 | 0                    | 0 | 0 | 0.000110387459984546 |
| unclassified(100) | Otu016359 | 0 | 0                    | 0 | 0 | 0.000110387459984546 |
| unclassified(100) | Otu016389 | 0 | 0                    | 0 | 0 | 0.000110387459984546 |
| unclassified(100) | Otu016391 | 0 | 0                    | 0 | 0 | 0.000110387459984546 |
| unclassified(100) | Otu016398 | 0 | 0                    | 0 | 0 | 0.000110387459984546 |

|                    |           |   |   |   |   |                      |
|--------------------|-----------|---|---|---|---|----------------------|
| unclassified(100)  | Otu016399 | 0 | 0 | 0 | 0 | 0.000110387459984546 |
| Aquabacterium(100) | Otu016408 | 0 | 0 | 0 | 0 | 0.000110387459984546 |
| Aquabacterium(100) | Otu016409 | 0 | 0 | 0 | 0 | 0.000110387459984546 |
| unclassified(100)  | Otu016423 | 0 | 0 | 0 | 0 | 0.000110387459984546 |
| unclassified(100)  | Otu016424 | 0 | 0 | 0 | 0 | 0.000110387459984546 |
| unclassified(100)  | Otu016436 | 0 | 0 | 0 | 0 | 0.000110387459984546 |
| unclassified(100)  | Otu016438 | 0 | 0 | 0 | 0 | 0.000110387459984546 |
| unclassified(100)  | Otu016440 | 0 | 0 | 0 | 0 | 0.000110387459984546 |
| unclassified(100)  | Otu016441 | 0 | 0 | 0 | 0 | 0.000110387459984546 |
| Aquabacterium(100) | Otu016442 | 0 | 0 | 0 | 0 | 0.000110387459984546 |
| Rhizobacter(100)   | Otu016474 | 0 | 0 | 0 | 0 | 0.000110387459984546 |
| unclassified(100)  | Otu016501 | 0 | 0 | 0 | 0 | 0.000110387459984546 |
| unclassified(100)  | Otu016505 | 0 | 0 | 0 | 0 | 0.000110387459984546 |
| unclassified(100)  | Otu016508 | 0 | 0 | 0 | 0 | 0.000110387459984546 |
| unclassified(100)  | Otu016529 | 0 | 0 | 0 | 0 | 0.000110387459984546 |
| Aquabacterium(100) | Otu016531 | 0 | 0 | 0 | 0 | 0.000110387459984546 |
| unclassified(100)  | Otu016534 | 0 | 0 | 0 | 0 | 0.000110387459984546 |
| unclassified(100)  | Otu016538 | 0 | 0 | 0 | 0 | 0.000110387459984546 |
| Rhizobacter(100)   | Otu016539 | 0 | 0 | 0 | 0 | 0.000110387459984546 |
| unclassified(100)  | Otu016545 | 0 | 0 | 0 | 0 | 0.000110387459984546 |
| Aquabacterium(100) | Otu016546 | 0 | 0 | 0 | 0 | 0.000110387459984546 |
| unclassified(100)  | Otu016620 | 0 | 0 | 0 | 0 | 0.000110387459984546 |
| unclassified(100)  | Otu016622 | 0 | 0 | 0 | 0 | 0.000110387459984546 |
| unclassified(100)  | Otu016627 | 0 | 0 | 0 | 0 | 0.000110387459984546 |
| unclassified(100)  | Otu016628 | 0 | 0 | 0 | 0 | 0.000110387459984546 |
| unclassified(100)  | Otu016636 | 0 | 0 | 0 | 0 | 0.000110387459984546 |
| unclassified(100)  | Otu016675 | 0 | 0 | 0 | 0 | 0.000110387459984546 |
| Tepidimonas(100)   | Otu016680 | 0 | 0 | 0 | 0 | 0.000110387459984546 |
| unclassified(100)  | Otu016681 | 0 | 0 | 0 | 0 | 0.000110387459984546 |
| unclassified(100)  | Otu016682 | 0 | 0 | 0 | 0 | 0.000110387459984546 |
| unclassified(100)  | Otu016687 | 0 | 0 | 0 | 0 | 0.000110387459984546 |
| Rhizobacter(100)   | Otu016689 | 0 | 0 | 0 | 0 | 0.000110387459984546 |
| Aquabacterium(100) | Otu016694 | 0 | 0 | 0 | 0 | 0.000110387459984546 |

|                    |           |   |   |   |                     |                      |
|--------------------|-----------|---|---|---|---------------------|----------------------|
| unclassified(100)  | Otu016702 | 0 | 0 | 0 | 0                   | 0.000110387459984546 |
| Aquabacterium(100) | Otu016709 | 0 | 0 | 0 | 0                   | 0.000110387459984546 |
| unclassified(100)  | Otu016711 | 0 | 0 | 0 | 0                   | 0.000110387459984546 |
| Aquabacterium(100) | Otu016713 | 0 | 0 | 0 | 0                   | 0.000110387459984546 |
| unclassified(100)  | Otu016714 | 0 | 0 | 0 | 0                   | 0.000110387459984546 |
| Aquabacterium(100) | Otu016719 | 0 | 0 | 0 | 0                   | 0.000110387459984546 |
| unclassified(100)  | Otu016720 | 0 | 0 | 0 | 0                   | 0.000110387459984546 |
| Aquabacterium(100) | Otu016721 | 0 | 0 | 0 | 0                   | 0.000110387459984546 |
| unclassified(100)  | Otu016724 | 0 | 0 | 0 | 0                   | 0.000110387459984546 |
| Aquabacterium(100) | Otu016725 | 0 | 0 | 0 | 0                   | 0.000110387459984546 |
| unclassified(100)  | Otu016727 | 0 | 0 | 0 | 0                   | 0.000110387459984546 |
| Aquabacterium(100) | Otu016728 | 0 | 0 | 0 | 0                   | 0.000110387459984546 |
| unclassified(100)  | Otu016763 | 0 | 0 | 0 | 0                   | 0.000110387459984546 |
| unclassified(100)  | Otu016765 | 0 | 0 | 0 | 0                   | 0.000110387459984546 |
| Aquabacterium(100) | Otu016767 | 0 | 0 | 0 | 0                   | 0.000110387459984546 |
| Rhizobacter(100)   | Otu016776 | 0 | 0 | 0 | 0                   | 0.000110387459984546 |
| unclassified(100)  | Otu016777 | 0 | 0 | 0 | 0                   | 0.000110387459984546 |
| unclassified(100)  | Otu016782 | 0 | 0 | 0 | 0                   | 0.000110387459984546 |
| unclassified(100)  | Otu016855 | 0 | 0 | 0 | 0                   | 0.000110387459984546 |
| unclassified(100)  | Otu016857 | 0 | 0 | 0 | 0                   | 0.000110387459984546 |
| unclassified(100)  | Otu016858 | 0 | 0 | 0 | 0                   | 0.000110387459984546 |
| unclassified(100)  | Otu016859 | 0 | 0 | 0 | 0                   | 0.000110387459984546 |
| unclassified(100)  | Otu016860 | 0 | 0 | 0 | 0                   | 0.000110387459984546 |
| unclassified(100)  | Otu016861 | 0 | 0 | 0 | 0                   | 0.000110387459984546 |
| unclassified(100)  | Otu016862 | 0 | 0 | 0 | 0                   | 0.000110387459984546 |
| unclassified(100)  | Otu016864 | 0 | 0 | 0 | 0                   | 0.000110387459984546 |
| unclassified(100)  | Otu016866 | 0 | 0 | 0 | 0                   | 0.000110387459984546 |
| unclassified(100)  | Otu016905 | 0 | 0 | 0 | 0                   | 0.000110387459984546 |
| unclassified(100)  | Otu016916 | 0 | 0 | 0 | 0                   | 0.000110387459984546 |
| unclassified(100)  | Otu016917 | 0 | 0 | 0 | 0                   | 0.000110387459984546 |
| unclassified(100)  | Otu016920 | 0 | 0 | 0 | 0                   | 0.000110387459984546 |
| Aquabacterium(100) | Otu016947 | 0 | 0 | 0 | 0                   | 0.000110387459984546 |
| Dysgonomonas(100)  | Otu016967 | 0 | 0 | 0 | 0.00012482836100362 | 0                    |

|                    |           |   |                      |                      |                     |                      |
|--------------------|-----------|---|----------------------|----------------------|---------------------|----------------------|
| Dysgonomonas(100)  | Otu016971 | 0 | 0                    | 0                    | 0.00012482836100362 | 0                    |
| Dysgonomonas(100)  | Otu016981 | 0 | 0                    | 0                    | 0.00012482836100362 | 0                    |
| unclassified(100)  | Otu017018 | 0 | 0                    | 0                    | 0.00012482836100362 | 0                    |
| unclassified(100)  | Otu017483 | 0 | 0                    | 0                    | 0                   | 0.000110387459984546 |
| unclassified(100)  | Otu017518 | 0 | 0                    | 0                    | 0                   | 0.000110387459984546 |
| unclassified(100)  | Otu017720 | 0 | 0.000124968757810547 | 0                    | 0                   | 0                    |
| Aquabacterium(100) | Otu017723 | 0 | 0.000124968757810547 | 0                    | 0                   | 0                    |
| unclassified(100)  | Otu017733 | 0 | 0.000124968757810547 | 0                    | 0                   | 0                    |
| unclassified(100)  | Otu017783 | 0 | 0                    | 0.000109075043630017 | 0                   | 0                    |
| Aquabacterium(100) | Otu017791 | 0 | 0.000124968757810547 | 0                    | 0                   | 0                    |
| unclassified(100)  | Otu017798 | 0 | 0.000124968757810547 | 0                    | 0                   | 0                    |
| unclassified(100)  | Otu017815 | 0 | 0.000124968757810547 | 0                    | 0                   | 0                    |
| unclassified(100)  | Otu017832 | 0 | 0.000124968757810547 | 0                    | 0                   | 0                    |
| Tepidimonas(100)   | Otu017844 | 0 | 0.000124968757810547 | 0                    | 0                   | 0                    |
| unclassified(100)  | Otu017888 | 0 | 0.000124968757810547 | 0                    | 0                   | 0                    |
| unclassified(100)  | Otu017900 | 0 | 0.000124968757810547 | 0                    | 0                   | 0                    |
| unclassified(100)  | Otu017903 | 0 | 0.000124968757810547 | 0                    | 0                   | 0                    |
| unclassified(100)  | Otu017906 | 0 | 0.000124968757810547 | 0                    | 0                   | 0                    |
| unclassified(100)  | Otu017908 | 0 | 0.000124968757810547 | 0                    | 0                   | 0                    |
| unclassified(100)  | Otu017934 | 0 | 0.000124968757810547 | 0                    | 0                   | 0                    |
| unclassified(100)  | Otu017942 | 0 | 0.000124968757810547 | 0                    | 0                   | 0                    |
| unclassified(100)  | Otu017947 | 0 | 0                    | 0                    | 0.00012482836100362 | 0                    |
| unclassified(100)  | Otu017958 | 0 | 0                    | 0                    | 0.00012482836100362 | 0                    |
| unclassified(100)  | Otu017960 | 0 | 0                    | 0                    | 0.00012482836100362 | 0                    |
| unclassified(100)  | Otu017970 | 0 | 0                    | 0                    | 0.00012482836100362 | 0                    |
| unclassified(100)  | Otu017971 | 0 | 0                    | 0                    | 0.00012482836100362 | 0                    |
| unclassified(100)  | Otu017980 | 0 | 0.000124968757810547 | 0                    | 0                   | 0                    |
| Aquabacterium(100) | Otu017984 | 0 | 0.000124968757810547 | 0                    | 0                   | 0                    |
| Aquabacterium(100) | Otu017991 | 0 | 0.000124968757810547 | 0                    | 0                   | 0                    |
| unclassified(100)  | Otu017995 | 0 | 0.000124968757810547 | 0                    | 0                   | 0                    |
| unclassified(100)  | Otu018012 | 0 | 0                    | 0.000109075043630017 | 0                   | 0                    |
| unclassified(100)  | Otu018014 | 0 | 0                    | 0.000109075043630017 | 0                   | 0                    |
| Aquabacterium(100) | Otu018021 | 0 | 0                    | 0.000109075043630017 | 0                   | 0                    |

|                    |           |   |                      |                      |   |   |
|--------------------|-----------|---|----------------------|----------------------|---|---|
| Aquabacterium(100) | Otu018023 | 0 | 0                    | 0.000109075043630017 | 0 | 0 |
| unclassified(100)  | Otu018038 | 0 | 0.000124968757810547 | 0                    | 0 | 0 |
| unclassified(100)  | Otu018060 | 0 | 0.000124968757810547 | 0                    | 0 | 0 |
| unclassified(100)  | Otu018061 | 0 | 0.000124968757810547 | 0                    | 0 | 0 |
| unclassified(100)  | Otu018069 | 0 | 0.000124968757810547 | 0                    | 0 | 0 |
| unclassified(100)  | Otu018082 | 0 | 0.000124968757810547 | 0                    | 0 | 0 |
| Aquabacterium(100) | Otu018083 | 0 | 0.000124968757810547 | 0                    | 0 | 0 |
| unclassified(100)  | Otu018091 | 0 | 0                    | 0.000109075043630017 | 0 | 0 |
| Tepidimonas(100)   | Otu018098 | 0 | 0.000124968757810547 | 0                    | 0 | 0 |
| Tepidimonas(100)   | Otu018100 | 0 | 0.000124968757810547 | 0                    | 0 | 0 |
| Aquabacterium(100) | Otu018105 | 0 | 0.000124968757810547 | 0                    | 0 | 0 |
| unclassified(100)  | Otu018115 | 0 | 0.000124968757810547 | 0                    | 0 | 0 |
| unclassified(100)  | Otu018121 | 0 | 0                    | 0.000109075043630017 | 0 | 0 |
| unclassified(100)  | Otu018131 | 0 | 0                    | 0.000109075043630017 | 0 | 0 |
| Aquabacterium(100) | Otu018132 | 0 | 0                    | 0.000109075043630017 | 0 | 0 |
| unclassified(100)  | Otu018136 | 0 | 0                    | 0.000109075043630017 | 0 | 0 |
| Aquabacterium(100) | Otu018137 | 0 | 0                    | 0.000109075043630017 | 0 | 0 |
| Aquabacterium(100) | Otu018139 | 0 | 0                    | 0.000109075043630017 | 0 | 0 |
| unclassified(100)  | Otu018145 | 0 | 0.000124968757810547 | 0                    | 0 | 0 |
| unclassified(100)  | Otu018148 | 0 | 0                    | 0.000109075043630017 | 0 | 0 |
| unclassified(100)  | Otu018149 | 0 | 0                    | 0.000109075043630017 | 0 | 0 |
| unclassified(100)  | Otu018151 | 0 | 0                    | 0.000109075043630017 | 0 | 0 |
| unclassified(100)  | Otu018153 | 0 | 0                    | 0.000109075043630017 | 0 | 0 |
| Aquabacterium(100) | Otu018156 | 0 | 0                    | 0.000109075043630017 | 0 | 0 |
| unclassified(100)  | Otu018158 | 0 | 0                    | 0.000109075043630017 | 0 | 0 |
| Aquabacterium(100) | Otu018163 | 0 | 0                    | 0.000109075043630017 | 0 | 0 |
| unclassified(100)  | Otu018164 | 0 | 0                    | 0.000109075043630017 | 0 | 0 |
| unclassified(100)  | Otu018167 | 0 | 0                    | 0.000109075043630017 | 0 | 0 |
| unclassified(100)  | Otu018171 | 0 | 0                    | 0.000109075043630017 | 0 | 0 |
| Aquabacterium(100) | Otu018172 | 0 | 0                    | 0.000109075043630017 | 0 | 0 |
| Aquabacterium(100) | Otu018180 | 0 | 0                    | 0.000109075043630017 | 0 | 0 |
| Aquabacterium(100) | Otu018190 | 0 | 0                    | 0.000109075043630017 | 0 | 0 |
| Aquabacterium(100) | Otu018207 | 0 | 0                    | 0.000109075043630017 | 0 | 0 |

|                    |           |                       |                      |                      |   |   |
|--------------------|-----------|-----------------------|----------------------|----------------------|---|---|
| Aquabacterium(100) | Otu018225 | 0                     | 0                    | 0.000109075043630017 | 0 | 0 |
| unclassified(100)  | Otu018227 | 0                     | 0                    | 0.000109075043630017 | 0 | 0 |
| Aquabacterium(100) | Otu018228 | 0                     | 0                    | 0.000109075043630017 | 0 | 0 |
| unclassified(100)  | Otu018235 | 0                     | 0.000124968757810547 | 0                    | 0 | 0 |
| unclassified(100)  | Otu018238 | 0                     | 0.000124968757810547 | 0                    | 0 | 0 |
| unclassified(100)  | Otu018251 | 0                     | 0.000124968757810547 | 0                    | 0 | 0 |
| unclassified(100)  | Otu018258 | 0                     | 0                    | 0.000109075043630017 | 0 | 0 |
| unclassified(100)  | Otu018261 | 0                     | 0                    | 0.000109075043630017 | 0 | 0 |
| unclassified(100)  | Otu018269 | 0                     | 0.000124968757810547 | 0                    | 0 | 0 |
| unclassified(100)  | Otu018272 | 0.0000778513040093422 | 0                    | 0                    | 0 | 0 |
| unclassified(100)  | Otu018273 | 0                     | 0                    | 0.000109075043630017 | 0 | 0 |
| unclassified(100)  | Otu018275 | 0                     | 0                    | 0.000109075043630017 | 0 | 0 |
| unclassified(100)  | Otu018279 | 0                     | 0                    | 0.000109075043630017 | 0 | 0 |
| unclassified(100)  | Otu018282 | 0                     | 0                    | 0.000109075043630017 | 0 | 0 |
| unclassified(100)  | Otu018287 | 0                     | 0.000124968757810547 | 0                    | 0 | 0 |
| Aquabacterium(100) | Otu018312 | 0                     | 0                    | 0.000109075043630017 | 0 | 0 |
| unclassified(100)  | Otu018315 | 0                     | 0                    | 0.000109075043630017 | 0 | 0 |
| Rhizobacter(100)   | Otu018319 | 0                     | 0                    | 0.000109075043630017 | 0 | 0 |
| Aquabacterium(100) | Otu018320 | 0.0000778513040093422 | 0                    | 0                    | 0 | 0 |
| unclassified(100)  | Otu018325 | 0                     | 0                    | 0.000109075043630017 | 0 | 0 |
| unclassified(100)  | Otu018326 | 0.0000778513040093422 | 0                    | 0                    | 0 | 0 |
| Aquabacterium(100) | Otu018342 | 0                     | 0                    | 0.000109075043630017 | 0 | 0 |
| unclassified(100)  | Otu018343 | 0                     | 0                    | 0.000109075043630017 | 0 | 0 |
| unclassified(100)  | Otu018345 | 0                     | 0                    | 0.000109075043630017 | 0 | 0 |
| unclassified(100)  | Otu018348 | 0.0000778513040093422 | 0                    | 0                    | 0 | 0 |
| unclassified(100)  | Otu018355 | 0.0000778513040093422 | 0                    | 0                    | 0 | 0 |
| unclassified(100)  | Otu018370 | 0.0000778513040093422 | 0                    | 0                    | 0 | 0 |
| unclassified(100)  | Otu018371 | 0.0000778513040093422 | 0                    | 0                    | 0 | 0 |
| unclassified(100)  | Otu018372 | 0.0000778513040093422 | 0                    | 0                    | 0 | 0 |
| unclassified(100)  | Otu018387 | 0.0000778513040093422 | 0                    | 0                    | 0 | 0 |
| unclassified(100)  | Otu018388 | 0.0000778513040093422 | 0                    | 0                    | 0 | 0 |
| Aquabacterium(100) | Otu018393 | 0.0000778513040093422 | 0                    | 0                    | 0 | 0 |
| unclassified(100)  | Otu018410 | 0.0000778513040093422 | 0                    | 0                    | 0 | 0 |

|                    |           |                       |                      |   |   |   |
|--------------------|-----------|-----------------------|----------------------|---|---|---|
| unclassified(100)  | Otu018436 | 0.0000778513040093422 | 0                    | 0 | 0 | 0 |
| unclassified(100)  | Otu018443 | 0.0000778513040093422 | 0                    | 0 | 0 | 0 |
| Aquabacterium(100) | Otu018449 | 0.0000778513040093422 | 0                    | 0 | 0 | 0 |
| unclassified(100)  | Otu018452 | 0.0000778513040093422 | 0                    | 0 | 0 | 0 |
| unclassified(100)  | Otu018462 | 0.0000778513040093422 | 0                    | 0 | 0 | 0 |
| Aquabacterium(100) | Otu018463 | 0.0000778513040093422 | 0                    | 0 | 0 | 0 |
| unclassified(100)  | Otu018464 | 0.0000778513040093422 | 0                    | 0 | 0 | 0 |
| unclassified(100)  | Otu018465 | 0.0000778513040093422 | 0                    | 0 | 0 | 0 |
| unclassified(100)  | Otu018466 | 0.0000778513040093422 | 0                    | 0 | 0 | 0 |
| unclassified(100)  | Otu018468 | 0.0000778513040093422 | 0                    | 0 | 0 | 0 |
| unclassified(100)  | Otu018470 | 0.0000778513040093422 | 0                    | 0 | 0 | 0 |
| unclassified(100)  | Otu018471 | 0.0000778513040093422 | 0                    | 0 | 0 | 0 |
| unclassified(100)  | Otu018475 | 0.0000778513040093422 | 0                    | 0 | 0 | 0 |
| unclassified(100)  | Otu018479 | 0.0000778513040093422 | 0                    | 0 | 0 | 0 |
| Aquabacterium(100) | Otu018482 | 0.0000778513040093422 | 0                    | 0 | 0 | 0 |
| unclassified(100)  | Otu018492 | 0.0000778513040093422 | 0                    | 0 | 0 | 0 |
| unclassified(100)  | Otu018497 | 0.0000778513040093422 | 0                    | 0 | 0 | 0 |
| unclassified(100)  | Otu018504 | 0.0000778513040093422 | 0                    | 0 | 0 | 0 |
| unclassified(100)  | Otu018521 | 0.0000778513040093422 | 0                    | 0 | 0 | 0 |
| unclassified(100)  | Otu018524 | 0.0000778513040093422 | 0                    | 0 | 0 | 0 |
| unclassified(100)  | Otu018528 | 0.0000778513040093422 | 0                    | 0 | 0 | 0 |
| unclassified(100)  | Otu018539 | 0.0000778513040093422 | 0                    | 0 | 0 | 0 |
| unclassified(100)  | Otu018540 | 0.0000778513040093422 | 0                    | 0 | 0 | 0 |
| unclassified(100)  | Otu018541 | 0.0000778513040093422 | 0                    | 0 | 0 | 0 |
| unclassified(100)  | Otu018544 | 0.0000778513040093422 | 0                    | 0 | 0 | 0 |
| Aquabacterium(100) | Otu018548 | 0.0000778513040093422 | 0                    | 0 | 0 | 0 |
| unclassified(100)  | Otu018549 | 0.0000778513040093422 | 0                    | 0 | 0 | 0 |
| unclassified(100)  | Otu018551 | 0.0000778513040093422 | 0                    | 0 | 0 | 0 |
| Tepidimonas(100)   | Otu018567 | 0.0000778513040093422 | 0                    | 0 | 0 | 0 |
| unclassified(100)  | Otu018601 | 0                     | 0.000124968757810547 | 0 | 0 | 0 |
| unclassified(100)  | Otu018603 | 0                     | 0.000124968757810547 | 0 | 0 | 0 |
| unclassified(100)  | Otu018608 | 0.0000778513040093422 | 0                    | 0 | 0 | 0 |
| unclassified(100)  | Otu018614 | 0.0000778513040093422 | 0                    | 0 | 0 | 0 |

|                    |           |                       |   |                      |                     |   |
|--------------------|-----------|-----------------------|---|----------------------|---------------------|---|
| unclassified(100)  | Otu018621 | 0.0000778513040093422 | 0 | 0                    | 0                   | 0 |
| unclassified(100)  | Otu018630 | 0.0000778513040093422 | 0 | 0                    | 0                   | 0 |
| Aquabacterium(100) | Otu018637 | 0                     | 0 | 0                    | 0.00012482836100362 | 0 |
| unclassified(100)  | Otu018641 | 0                     | 0 | 0.000109075043630017 | 0                   | 0 |
| unclassified(100)  | Otu018657 | 0                     | 0 | 0.000109075043630017 | 0                   | 0 |
| unclassified(100)  | Otu018663 | 0                     | 0 | 0.000109075043630017 | 0                   | 0 |
| unclassified(100)  | Otu018676 | 0.0000778513040093422 | 0 | 0                    | 0                   | 0 |
| unclassified(100)  | Otu018682 | 0                     | 0 | 0.000109075043630017 | 0                   | 0 |
| unclassified(100)  | Otu018689 | 0                     | 0 | 0.000109075043630017 | 0                   | 0 |
| unclassified(100)  | Otu018691 | 0                     | 0 | 0.000109075043630017 | 0                   | 0 |
| unclassified(100)  | Otu018703 | 0.0000778513040093422 | 0 | 0                    | 0                   | 0 |
| unclassified(100)  | Otu018716 | 0.0000778513040093422 | 0 | 0                    | 0                   | 0 |
| unclassified(100)  | Otu018718 | 0.0000778513040093422 | 0 | 0                    | 0                   | 0 |
| Rhizobacter(100)   | Otu018722 | 0.0000778513040093422 | 0 | 0                    | 0                   | 0 |
| Aquabacterium(100) | Otu018723 | 0.0000778513040093422 | 0 | 0                    | 0                   | 0 |
| unclassified(100)  | Otu018730 | 0.0000778513040093422 | 0 | 0                    | 0                   | 0 |
| unclassified(100)  | Otu018732 | 0.0000778513040093422 | 0 | 0                    | 0                   | 0 |
| Aquabacterium(100) | Otu018734 | 0.0000778513040093422 | 0 | 0                    | 0                   | 0 |
| unclassified(100)  | Otu018748 | 0.0000778513040093422 | 0 | 0                    | 0                   | 0 |
| unclassified(100)  | Otu018760 | 0.0000778513040093422 | 0 | 0                    | 0                   | 0 |
| Rhizobacter(100)   | Otu018768 | 0.0000778513040093422 | 0 | 0                    | 0                   | 0 |
| Aquabacterium(100) | Otu018769 | 0.0000778513040093422 | 0 | 0                    | 0                   | 0 |
| unclassified(100)  | Otu018772 | 0.0000778513040093422 | 0 | 0                    | 0                   | 0 |
| Aquabacterium(100) | Otu018774 | 0.0000778513040093422 | 0 | 0                    | 0                   | 0 |
| unclassified(100)  | Otu018779 | 0.0000778513040093422 | 0 | 0                    | 0                   | 0 |
| unclassified(100)  | Otu018792 | 0.0000778513040093422 | 0 | 0                    | 0                   | 0 |
| unclassified(100)  | Otu018797 | 0.0000778513040093422 | 0 | 0                    | 0                   | 0 |
| unclassified(100)  | Otu018799 | 0.0000778513040093422 | 0 | 0                    | 0                   | 0 |
| unclassified(100)  | Otu018805 | 0.0000778513040093422 | 0 | 0                    | 0                   | 0 |
| unclassified(100)  | Otu018807 | 0.0000778513040093422 | 0 | 0                    | 0                   | 0 |
| unclassified(100)  | Otu018812 | 0                     | 0 | 0                    | 0.00012482836100362 | 0 |
| Tepidimonas(100)   | Otu018813 | 0                     | 0 | 0                    | 0.00012482836100362 | 0 |
| unclassified(100)  | Otu018831 | 0                     | 0 | 0                    | 0.00012482836100362 | 0 |



|                    |           |   |   |                      |                     |                      |
|--------------------|-----------|---|---|----------------------|---------------------|----------------------|
| unclassified(100)  | Otu018852 | 0 | 0 | 0                    | 0.00012482836100362 | 0                    |
| unclassified(100)  | Otu018854 | 0 | 0 | 0                    | 0.00012482836100362 | 0                    |
| unclassified(100)  | Otu018855 | 0 | 0 | 0                    | 0.00012482836100362 | 0                    |
| Aquabacterium(100) | Otu018866 | 0 | 0 | 0                    | 0.00012482836100362 | 0                    |
| Aquabacterium(100) | Otu018871 | 0 | 0 | 0                    | 0                   | 0.000110387459984546 |
| Aquabacterium(100) | Otu018872 | 0 | 0 | 0                    | 0                   | 0.000110387459984546 |
| unclassified(100)  | Otu018875 | 0 | 0 | 0                    | 0                   | 0.000110387459984546 |
| unclassified(100)  | Otu018894 | 0 | 0 | 0                    | 0                   | 0.000110387459984546 |
| Aquabacterium(100) | Otu018898 | 0 | 0 | 0                    | 0.00012482836100362 | 0                    |
| Aquabacterium(100) | Otu018904 | 0 | 0 | 0                    | 0                   | 0.000110387459984546 |
| unclassified(100)  | Otu018911 | 0 | 0 | 0                    | 0                   | 0.000110387459984546 |
| unclassified(100)  | Otu018920 | 0 | 0 | 0                    | 0                   | 0.000110387459984546 |
| Rhizobacter(100)   | Otu018923 | 0 | 0 | 0                    | 0                   | 0.000110387459984546 |
| unclassified(100)  | Otu018927 | 0 | 0 | 0.000109075043630017 | 0                   | 0                    |
| unclassified(100)  | Otu018931 | 0 | 0 | 0.000109075043630017 | 0                   | 0                    |
| unclassified(100)  | Otu018943 | 0 | 0 | 0.000109075043630017 | 0                   | 0                    |
| unclassified(100)  | Otu018962 | 0 | 0 | 0.000109075043630017 | 0                   | 0                    |
| Aquabacterium(100) | Otu018969 | 0 | 0 | 0.000109075043630017 | 0                   | 0                    |
| unclassified(100)  | Otu018975 | 0 | 0 | 0.000109075043630017 | 0                   | 0                    |
| unclassified(100)  | Otu018976 | 0 | 0 | 0.000109075043630017 | 0                   | 0                    |
| Aquabacterium(100) | Otu018979 | 0 | 0 | 0.000109075043630017 | 0                   | 0                    |
| unclassified(100)  | Otu018986 | 0 | 0 | 0.000109075043630017 | 0                   | 0                    |
| unclassified(100)  | Otu018987 | 0 | 0 | 0.000109075043630017 | 0                   | 0                    |
| unclassified(100)  | Otu018989 | 0 | 0 | 0.000109075043630017 | 0                   | 0                    |
| unclassified(100)  | Otu019002 | 0 | 0 | 0                    | 0.00012482836100362 | 0                    |
| unclassified(100)  | Otu019003 | 0 | 0 | 0                    | 0.00012482836100362 | 0                    |
| Tepidimonas(100)   | Otu019013 | 0 | 0 | 0                    | 0.00012482836100362 | 0                    |
| unclassified(100)  | Otu019019 | 0 | 0 | 0.000109075043630017 | 0                   | 0                    |
| Aquabacterium(100) | Otu019035 | 0 | 0 | 0.000109075043630017 | 0                   | 0                    |
| unclassified(100)  | Otu019036 | 0 | 0 | 0.000109075043630017 | 0                   | 0                    |
| unclassified(100)  | Otu019047 | 0 | 0 | 0                    | 0                   | 0.000110387459984546 |
| unclassified(100)  | Otu019054 | 0 | 0 | 0                    | 0                   | 0.000110387459984546 |
| unclassified(100)  | Otu019056 | 0 | 0 | 0                    | 0                   | 0.000110387459984546 |

|                    |           |   |   |                      |                     |                      |
|--------------------|-----------|---|---|----------------------|---------------------|----------------------|
| unclassified(100)  | Otu019062 | 0 | 0 | 0                    | 0                   | 0.000110387459984546 |
| unclassified(100)  | Otu019070 | 0 | 0 | 0                    | 0                   | 0.000110387459984546 |
| unclassified(100)  | Otu019074 | 0 | 0 | 0                    | 0                   | 0.000110387459984546 |
| unclassified(100)  | Otu019100 | 0 | 0 | 0.000109075043630017 | 0                   | 0                    |
| unclassified(100)  | Otu019102 | 0 | 0 | 0.000109075043630017 | 0                   | 0                    |
| unclassified(100)  | Otu019110 | 0 | 0 | 0.000109075043630017 | 0                   | 0                    |
| unclassified(100)  | Otu019112 | 0 | 0 | 0.000109075043630017 | 0                   | 0                    |
| unclassified(100)  | Otu019124 | 0 | 0 | 0.000109075043630017 | 0                   | 0                    |
| Aquabacterium(100) | Otu019128 | 0 | 0 | 0                    | 0                   | 0.000110387459984546 |
| unclassified(100)  | Otu019129 | 0 | 0 | 0                    | 0                   | 0.000110387459984546 |
| unclassified(100)  | Otu019134 | 0 | 0 | 0                    | 0                   | 0.000110387459984546 |
| unclassified(100)  | Otu019135 | 0 | 0 | 0                    | 0                   | 0.000110387459984546 |
| Aquabacterium(100) | Otu019143 | 0 | 0 | 0.000109075043630017 | 0                   | 0                    |
| Aquabacterium(100) | Otu019148 | 0 | 0 | 0                    | 0                   | 0.000110387459984546 |
| unclassified(100)  | Otu019151 | 0 | 0 | 0.000109075043630017 | 0                   | 0                    |
| Aquabacterium(100) | Otu019153 | 0 | 0 | 0.000109075043630017 | 0                   | 0                    |
| unclassified(100)  | Otu019154 | 0 | 0 | 0.000109075043630017 | 0                   | 0                    |
| Aquabacterium(100) | Otu019156 | 0 | 0 | 0.000109075043630017 | 0                   | 0                    |
| unclassified(100)  | Otu019166 | 0 | 0 | 0                    | 0.00012482836100362 | 0                    |
| Aquabacterium(100) | Otu019189 | 0 | 0 | 0                    | 0.00012482836100362 | 0                    |
| Aquabacterium(100) | Otu019202 | 0 | 0 | 0                    | 0.00012482836100362 | 0                    |
| unclassified(100)  | Otu019208 | 0 | 0 | 0                    | 0.00012482836100362 | 0                    |
| unclassified(100)  | Otu019218 | 0 | 0 | 0                    | 0                   | 0.000110387459984546 |
| unclassified(100)  | Otu019220 | 0 | 0 | 0                    | 0                   | 0.000110387459984546 |
| unclassified(100)  | Otu019222 | 0 | 0 | 0                    | 0                   | 0.000110387459984546 |
| unclassified(100)  | Otu019226 | 0 | 0 | 0                    | 0                   | 0.000110387459984546 |
| unclassified(100)  | Otu019231 | 0 | 0 | 0                    | 0                   | 0.000110387459984546 |
| unclassified(100)  | Otu019234 | 0 | 0 | 0                    | 0                   | 0.000110387459984546 |
| unclassified(100)  | Otu019235 | 0 | 0 | 0                    | 0                   | 0.000110387459984546 |
| unclassified(100)  | Otu019241 | 0 | 0 | 0                    | 0                   | 0.000110387459984546 |
| unclassified(100)  | Otu019250 | 0 | 0 | 0                    | 0                   | 0.000110387459984546 |
| unclassified(100)  | Otu019251 | 0 | 0 | 0                    | 0                   | 0.000110387459984546 |
| Rhizobacter(100)   | Otu019260 | 0 | 0 | 0                    | 0                   | 0.000110387459984546 |

|                    |           |                       |   |                      |   |                      |
|--------------------|-----------|-----------------------|---|----------------------|---|----------------------|
| unclassified(100)  | Otu019261 | 0                     | 0 | 0                    | 0 | 0.000110387459984546 |
| unclassified(100)  | Otu019270 | 0                     | 0 | 0                    | 0 | 0.000110387459984546 |
| unclassified(100)  | Otu019276 | 0                     | 0 | 0.000109075043630017 | 0 | 0                    |
| unclassified(100)  | Otu019279 | 0                     | 0 | 0.000109075043630017 | 0 | 0                    |
| unclassified(100)  | Otu019283 | 0                     | 0 | 0.000109075043630017 | 0 | 0                    |
| Aquabacterium(100) | Otu019284 | 0                     | 0 | 0.000109075043630017 | 0 | 0                    |
| unclassified(100)  | Otu019286 | 0                     | 0 | 0.000109075043630017 | 0 | 0                    |
| unclassified(100)  | Otu019292 | 0                     | 0 | 0.000109075043630017 | 0 | 0                    |
| Rhizobacter(100)   | Otu019304 | 0                     | 0 | 0.000109075043630017 | 0 | 0                    |
| Aquabacterium(100) | Otu019305 | 0                     | 0 | 0.000109075043630017 | 0 | 0                    |
| unclassified(100)  | Otu019310 | 0                     | 0 | 0.000109075043630017 | 0 | 0                    |
| unclassified(100)  | Otu019311 | 0                     | 0 | 0.000109075043630017 | 0 | 0                    |
| Rhizobacter(100)   | Otu019325 | 0                     | 0 | 0.000109075043630017 | 0 | 0                    |
| unclassified(100)  | Otu019329 | 0                     | 0 | 0.000109075043630017 | 0 | 0                    |
| unclassified(100)  | Otu019337 | 0.0000778513040093422 | 0 | 0                    | 0 | 0                    |
| unclassified(100)  | Otu019339 | 0.0000778513040093422 | 0 | 0                    | 0 | 0                    |
| unclassified(100)  | Otu019340 | 0.0000778513040093422 | 0 | 0                    | 0 | 0                    |
| unclassified(100)  | Otu019343 | 0.0000778513040093422 | 0 | 0                    | 0 | 0                    |
| unclassified(100)  | Otu019346 | 0.0000778513040093422 | 0 | 0                    | 0 | 0                    |
| unclassified(100)  | Otu019354 | 0.0000778513040093422 | 0 | 0                    | 0 | 0                    |
| Aquabacterium(100) | Otu019356 | 0.0000778513040093422 | 0 | 0                    | 0 | 0                    |
| unclassified(100)  | Otu019368 | 0                     | 0 | 0.000109075043630017 | 0 | 0                    |
| unclassified(100)  | Otu019369 | 0                     | 0 | 0.000109075043630017 | 0 | 0                    |
| unclassified(100)  | Otu019378 | 0.0000778513040093422 | 0 | 0                    | 0 | 0                    |
| Aquabacterium(100) | Otu019381 | 0.0000778513040093422 | 0 | 0                    | 0 | 0                    |
| unclassified(100)  | Otu019383 | 0.0000778513040093422 | 0 | 0                    | 0 | 0                    |
| unclassified(100)  | Otu019385 | 0.0000778513040093422 | 0 | 0                    | 0 | 0                    |
| unclassified(100)  | Otu019388 | 0                     | 0 | 0.000109075043630017 | 0 | 0                    |
| unclassified(100)  | Otu019392 | 0                     | 0 | 0.000109075043630017 | 0 | 0                    |
| unclassified(100)  | Otu019394 | 0                     | 0 | 0.000109075043630017 | 0 | 0                    |
| unclassified(100)  | Otu019398 | 0                     | 0 | 0.000109075043630017 | 0 | 0                    |
| unclassified(100)  | Otu019405 | 0                     | 0 | 0.000109075043630017 | 0 | 0                    |
| Aquabacterium(100) | Otu019412 | 0                     | 0 | 0.000109075043630017 | 0 | 0                    |

|                    |           |   |   |                      |                     |                      |
|--------------------|-----------|---|---|----------------------|---------------------|----------------------|
| unclassified(100)  | Otu019417 | 0 | 0 | 0.000109075043630017 | 0                   | 0                    |
| unclassified(100)  | Otu019421 | 0 | 0 | 0.000109075043630017 | 0                   | 0                    |
| unclassified(100)  | Otu019430 | 0 | 0 | 0.000109075043630017 | 0                   | 0                    |
| unclassified(100)  | Otu019432 | 0 | 0 | 0.000109075043630017 | 0                   | 0                    |
| unclassified(100)  | Otu019433 | 0 | 0 | 0.000109075043630017 | 0                   | 0                    |
| Rhizobacter(100)   | Otu019434 | 0 | 0 | 0.000109075043630017 | 0                   | 0                    |
| unclassified(100)  | Otu019436 | 0 | 0 | 0.000109075043630017 | 0                   | 0                    |
| Pelomonas(100)     | Otu019437 | 0 | 0 | 0.000109075043630017 | 0                   | 0                    |
| unclassified(100)  | Otu019438 | 0 | 0 | 0.000109075043630017 | 0                   | 0                    |
| unclassified(100)  | Otu019441 | 0 | 0 | 0.000109075043630017 | 0                   | 0                    |
| unclassified(100)  | Otu019442 | 0 | 0 | 0.000109075043630017 | 0                   | 0                    |
| unclassified(100)  | Otu019451 | 0 | 0 | 0.000109075043630017 | 0                   | 0                    |
| unclassified(100)  | Otu019454 | 0 | 0 | 0.000109075043630017 | 0                   | 0                    |
| Aquabacterium(100) | Otu019456 | 0 | 0 | 0.000109075043630017 | 0                   | 0                    |
| Aquabacterium(100) | Otu019457 | 0 | 0 | 0.000109075043630017 | 0                   | 0                    |
| unclassified(100)  | Otu019460 | 0 | 0 | 0.000109075043630017 | 0                   | 0                    |
| unclassified(100)  | Otu019467 | 0 | 0 | 0.000109075043630017 | 0                   | 0                    |
| unclassified(100)  | Otu019474 | 0 | 0 | 0.000109075043630017 | 0                   | 0                    |
| unclassified(100)  | Otu019475 | 0 | 0 | 0.000109075043630017 | 0                   | 0                    |
| unclassified(100)  | Otu019476 | 0 | 0 | 0.000109075043630017 | 0                   | 0                    |
| Aquabacterium(100) | Otu019477 | 0 | 0 | 0.000109075043630017 | 0                   | 0                    |
| unclassified(100)  | Otu019478 | 0 | 0 | 0.000109075043630017 | 0                   | 0                    |
| Aquabacterium(100) | Otu019480 | 0 | 0 | 0.000109075043630017 | 0                   | 0                    |
| unclassified(100)  | Otu019491 | 0 | 0 | 0.000109075043630017 | 0                   | 0                    |
| unclassified(100)  | Otu019496 | 0 | 0 | 0.000109075043630017 | 0                   | 0                    |
| unclassified(100)  | Otu019498 | 0 | 0 | 0.000109075043630017 | 0                   | 0                    |
| unclassified(100)  | Otu019499 | 0 | 0 | 0.000109075043630017 | 0                   | 0                    |
| Dysgonomonas(100)  | Otu019505 | 0 | 0 | 0                    | 0                   | 0.000110387459984546 |
| unclassified(100)  | Otu019511 | 0 | 0 | 0                    | 0                   | 0.000110387459984546 |
| Dysgonomonas(100)  | Otu019516 | 0 | 0 | 0                    | 0                   | 0.000110387459984546 |
| Dysgonomonas(100)  | Otu019520 | 0 | 0 | 0                    | 0                   | 0.000110387459984546 |
| Dysgonomonas(100)  | Otu019523 | 0 | 0 | 0                    | 0                   | 0.000110387459984546 |
| Dysgonomonas(100)  | Otu019531 | 0 | 0 | 0                    | 0.00012482836100362 | 0                    |

|                   |           |   |   |   |                     |                      |
|-------------------|-----------|---|---|---|---------------------|----------------------|
| Dysgonomonas(100) | Otu019537 | 0 | 0 | 0 | 0.00012482836100362 | 0                    |
| Dysgonomonas(100) | Otu019539 | 0 | 0 | 0 | 0.00012482836100362 | 0                    |
| Dysgonomonas(100) | Otu019547 | 0 | 0 | 0 | 0.00012482836100362 | 0                    |
| Dysgonomonas(100) | Otu019550 | 0 | 0 | 0 | 0.00012482836100362 | 0                    |
| Dysgonomonas(100) | Otu019551 | 0 | 0 | 0 | 0                   | 0.000110387459984546 |
| Dysgonomonas(100) | Otu019552 | 0 | 0 | 0 | 0                   | 0.000110387459984546 |
| Dysgonomonas(100) | Otu019554 | 0 | 0 | 0 | 0                   | 0.000110387459984546 |
| Dysgonomonas(100) | Otu019557 | 0 | 0 | 0 | 0                   | 0.000110387459984546 |
| Dysgonomonas(100) | Otu019559 | 0 | 0 | 0 | 0                   | 0.000110387459984546 |
| Dysgonomonas(100) | Otu019567 | 0 | 0 | 0 | 0                   | 0.000110387459984546 |
| Dysgonomonas(100) | Otu019572 | 0 | 0 | 0 | 0                   | 0.000110387459984546 |
| Dysgonomonas(100) | Otu019573 | 0 | 0 | 0 | 0                   | 0.000110387459984546 |
| Dysgonomonas(100) | Otu019576 | 0 | 0 | 0 | 0                   | 0.000110387459984546 |
| Dysgonomonas(100) | Otu019578 | 0 | 0 | 0 | 0                   | 0.000110387459984546 |
| Dysgonomonas(100) | Otu019583 | 0 | 0 | 0 | 0                   | 0.000110387459984546 |
| Dysgonomonas(100) | Otu019584 | 0 | 0 | 0 | 0                   | 0.000110387459984546 |
| Dysgonomonas(100) | Otu019585 | 0 | 0 | 0 | 0                   | 0.000110387459984546 |
| Dysgonomonas(100) | Otu019586 | 0 | 0 | 0 | 0                   | 0.000110387459984546 |
| Dysgonomonas(100) | Otu019587 | 0 | 0 | 0 | 0                   | 0.000110387459984546 |
| Dysgonomonas(100) | Otu019589 | 0 | 0 | 0 | 0                   | 0.000110387459984546 |
| Dysgonomonas(100) | Otu019590 | 0 | 0 | 0 | 0                   | 0.000110387459984546 |
| Dysgonomonas(100) | Otu019602 | 0 | 0 | 0 | 0                   | 0.000110387459984546 |
| Dysgonomonas(100) | Otu019609 | 0 | 0 | 0 | 0                   | 0.000110387459984546 |
| Dysgonomonas(100) | Otu019660 | 0 | 0 | 0 | 0.00012482836100362 | 0                    |
| Dysgonomonas(100) | Otu019670 | 0 | 0 | 0 | 0.00012482836100362 | 0                    |
| Dysgonomonas(100) | Otu019680 | 0 | 0 | 0 | 0.00012482836100362 | 0                    |
| Dysgonomonas(100) | Otu019689 | 0 | 0 | 0 | 0.00012482836100362 | 0                    |
| Dysgonomonas(100) | Otu019691 | 0 | 0 | 0 | 0.00012482836100362 | 0                    |
| Dysgonomonas(100) | Otu019853 | 0 | 0 | 0 | 0.00012482836100362 | 0                    |
| Dysgonomonas(100) | Otu019854 | 0 | 0 | 0 | 0.00012482836100362 | 0                    |
| Dysgonomonas(100) | Otu019855 | 0 | 0 | 0 | 0.00012482836100362 | 0                    |
| Dysgonomonas(100) | Otu019866 | 0 | 0 | 0 | 0.00012482836100362 | 0                    |
| Dysgonomonas(100) | Otu019868 | 0 | 0 | 0 | 0.00012482836100362 | 0                    |

|                   |           |   |                      |                      |                     |                      |
|-------------------|-----------|---|----------------------|----------------------|---------------------|----------------------|
| Dysgonomonas(100) | Otu019876 | 0 | 0                    | 0                    | 0                   | 0.000110387459984546 |
| Dysgonomonas(100) | Otu019881 | 0 | 0                    | 0                    | 0.00012482836100362 | 0                    |
| Dysgonomonas(100) | Otu019891 | 0 | 0                    | 0                    | 0.00012482836100362 | 0                    |
| unclassified(100) | Otu019893 | 0 | 0                    | 0                    | 0                   | 0.000110387459984546 |
| Dysgonomonas(100) | Otu019896 | 0 | 0                    | 0                    | 0.00012482836100362 | 0                    |
| Dysgonomonas(100) | Otu019936 | 0 | 0                    | 0                    | 0                   | 0.000110387459984546 |
| Dysgonomonas(100) | Otu019937 | 0 | 0                    | 0                    | 0                   | 0.000110387459984546 |
| Dysgonomonas(100) | Otu019938 | 0 | 0                    | 0                    | 0                   | 0.000110387459984546 |
| Dysgonomonas(100) | Otu019941 | 0 | 0                    | 0                    | 0                   | 0.000110387459984546 |
| Dysgonomonas(100) | Otu019942 | 0 | 0                    | 0                    | 0                   | 0.000110387459984546 |
| Dysgonomonas(100) | Otu019960 | 0 | 0                    | 0                    | 0.00012482836100362 | 0                    |
| Dysgonomonas(100) | Otu019962 | 0 | 0                    | 0                    | 0.00012482836100362 | 0                    |
| Dysgonomonas(100) | Otu020269 | 0 | 0                    | 0                    | 0.00012482836100362 | 0                    |
| Dysgonomonas(100) | Otu020280 | 0 | 0                    | 0                    | 0.00012482836100362 | 0                    |
| Dysgonomonas(100) | Otu020284 | 0 | 0                    | 0                    | 0.00012482836100362 | 0                    |
| Dysgonomonas(100) | Otu020289 | 0 | 0                    | 0                    | 0.00012482836100362 | 0                    |
| unclassified(100) | Otu020298 | 0 | 0                    | 0                    | 0.00012482836100362 | 0                    |
| Dysgonomonas(100) | Otu020658 | 0 | 0.000124968757810547 | 0                    | 0                   | 0                    |
| Dysgonomonas(100) | Otu020660 | 0 | 0.000124968757810547 | 0                    | 0                   | 0                    |
| Dysgonomonas(100) | Otu020663 | 0 | 0.000124968757810547 | 0                    | 0                   | 0                    |
| Dysgonomonas(100) | Otu020695 | 0 | 0.000124968757810547 | 0                    | 0                   | 0                    |
| Dysgonomonas(100) | Otu020801 | 0 | 0.000124968757810547 | 0                    | 0                   | 0                    |
| Dysgonomonas(100) | Otu020831 | 0 | 0.000124968757810547 | 0                    | 0                   | 0                    |
| Dysgonomonas(100) | Otu020843 | 0 | 0.000124968757810547 | 0                    | 0                   | 0                    |
| Dysgonomonas(100) | Otu020850 | 0 | 0.000124968757810547 | 0                    | 0                   | 0                    |
| Dysgonomonas(100) | Otu020886 | 0 | 0.000124968757810547 | 0                    | 0                   | 0                    |
| Dysgonomonas(100) | Otu021354 | 0 | 0                    | 0.000109075043630017 | 0                   | 0                    |
| Dysgonomonas(100) | Otu021358 | 0 | 0                    | 0.000109075043630017 | 0                   | 0                    |
| Dysgonomonas(100) | Otu021360 | 0 | 0                    | 0.000109075043630017 | 0                   | 0                    |
| Dysgonomonas(100) | Otu021361 | 0 | 0                    | 0.000109075043630017 | 0                   | 0                    |
| Dysgonomonas(100) | Otu021362 | 0 | 0                    | 0.000109075043630017 | 0                   | 0                    |
| Dysgonomonas(100) | Otu021367 | 0 | 0                    | 0.000109075043630017 | 0                   | 0                    |
| Dysgonomonas(100) | Otu021373 | 0 | 0                    | 0.000109075043630017 | 0                   | 0                    |

|                   |           |   |   |                      |                     |                      |
|-------------------|-----------|---|---|----------------------|---------------------|----------------------|
| Dysgonomonas(100) | Otu021374 | 0 | 0 | 0.000109075043630017 | 0                   | 0                    |
| Dysgonomonas(100) | Otu021376 | 0 | 0 | 0.000109075043630017 | 0                   | 0                    |
| Dysgonomonas(100) | Otu021393 | 0 | 0 | 0.000109075043630017 | 0                   | 0                    |
| Dysgonomonas(100) | Otu021399 | 0 | 0 | 0.000109075043630017 | 0                   | 0                    |
| Dysgonomonas(100) | Otu021402 | 0 | 0 | 0.000109075043630017 | 0                   | 0                    |
| Dysgonomonas(100) | Otu021403 | 0 | 0 | 0.000109075043630017 | 0                   | 0                    |
| Dysgonomonas(100) | Otu021404 | 0 | 0 | 0.000109075043630017 | 0                   | 0                    |
| Dysgonomonas(100) | Otu021415 | 0 | 0 | 0.000109075043630017 | 0                   | 0                    |
| Dysgonomonas(100) | Otu021417 | 0 | 0 | 0.000109075043630017 | 0                   | 0                    |
| Dysgonomonas(100) | Otu021429 | 0 | 0 | 0.000109075043630017 | 0                   | 0                    |
| unclassified(100) | Otu021442 | 0 | 0 | 0.000109075043630017 | 0                   | 0                    |
| Dysgonomonas(100) | Otu021445 | 0 | 0 | 0.000109075043630017 | 0                   | 0                    |
| Dysgonomonas(100) | Otu021447 | 0 | 0 | 0.000109075043630017 | 0                   | 0                    |
| Dysgonomonas(100) | Otu021449 | 0 | 0 | 0.000109075043630017 | 0                   | 0                    |
| Dysgonomonas(100) | Otu021460 | 0 | 0 | 0.000109075043630017 | 0                   | 0                    |
| Dysgonomonas(100) | Otu021466 | 0 | 0 | 0                    | 0.00012482836100362 | 0                    |
| Dysgonomonas(100) | Otu021470 | 0 | 0 | 0.000109075043630017 | 0                   | 0                    |
| Dysgonomonas(100) | Otu021482 | 0 | 0 | 0                    | 0.00012482836100362 | 0                    |
| unclassified(100) | Otu021483 | 0 | 0 | 0                    | 0.00012482836100362 | 0                    |
| Dysgonomonas(100) | Otu021490 | 0 | 0 | 0                    | 0.00012482836100362 | 0                    |
| Dysgonomonas(100) | Otu021491 | 0 | 0 | 0.000109075043630017 | 0                   | 0                    |
| Dysgonomonas(100) | Otu021502 | 0 | 0 | 0                    | 0                   | 0.000110387459984546 |
| Dysgonomonas(100) | Otu021507 | 0 | 0 | 0                    | 0                   | 0.000110387459984546 |
| Dysgonomonas(100) | Otu021509 | 0 | 0 | 0                    | 0                   | 0.000110387459984546 |
| Dysgonomonas(100) | Otu021515 | 0 | 0 | 0                    | 0                   | 0.000110387459984546 |
| unclassified(100) | Otu021519 | 0 | 0 | 0                    | 0                   | 0.000110387459984546 |
| Dysgonomonas(100) | Otu021520 | 0 | 0 | 0                    | 0                   | 0.000110387459984546 |
| Dysgonomonas(100) | Otu021521 | 0 | 0 | 0                    | 0                   | 0.000110387459984546 |
| Dysgonomonas(100) | Otu021555 | 0 | 0 | 0.000109075043630017 | 0                   | 0                    |
| Dysgonomonas(100) | Otu021558 | 0 | 0 | 0.000109075043630017 | 0                   | 0                    |
| Dysgonomonas(100) | Otu021560 | 0 | 0 | 0.000109075043630017 | 0                   | 0                    |
| Dysgonomonas(100) | Otu021562 | 0 | 0 | 0.000109075043630017 | 0                   | 0                    |
| Dysgonomonas(100) | Otu021563 | 0 | 0 | 0.000109075043630017 | 0                   | 0                    |

|                   |           |   |   |                      |                     |                      |
|-------------------|-----------|---|---|----------------------|---------------------|----------------------|
| Dysgonomonas(100) | Otu021565 | 0 | 0 | 0.000109075043630017 | 0                   | 0                    |
| Dysgonomonas(100) | Otu021628 | 0 | 0 | 0                    | 0                   | 0.000110387459984546 |
| Dysgonomonas(100) | Otu021629 | 0 | 0 | 0                    | 0                   | 0.000110387459984546 |
| Dysgonomonas(100) | Otu021761 | 0 | 0 | 0                    | 0                   | 0.000110387459984546 |
| Dysgonomonas(100) | Otu021762 | 0 | 0 | 0                    | 0                   | 0.000110387459984546 |
| Dysgonomonas(100) | Otu021934 | 0 | 0 | 0                    | 0.00012482836100362 | 0                    |
| Dysgonomonas(100) | Otu021949 | 0 | 0 | 0                    | 0.00012482836100362 | 0                    |
| Dysgonomonas(100) | Otu021967 | 0 | 0 | 0                    | 0.00012482836100362 | 0                    |
| Dysgonomonas(100) | Otu021976 | 0 | 0 | 0                    | 0.00012482836100362 | 0                    |
| Dysgonomonas(100) | Otu021989 | 0 | 0 | 0                    | 0.00012482836100362 | 0                    |
| Dysgonomonas(100) | Otu021997 | 0 | 0 | 0                    | 0.00012482836100362 | 0                    |
| Dysgonomonas(100) | Otu022022 | 0 | 0 | 0                    | 0.00012482836100362 | 0                    |
| Dysgonomonas(100) | Otu022024 | 0 | 0 | 0                    | 0.00012482836100362 | 0                    |
| Dysgonomonas(100) | Otu022035 | 0 | 0 | 0                    | 0.00012482836100362 | 0                    |
| Dysgonomonas(100) | Otu022042 | 0 | 0 | 0                    | 0.00012482836100362 | 0                    |
| Dysgonomonas(100) | Otu022045 | 0 | 0 | 0.000109075043630017 | 0                   | 0                    |
| Dysgonomonas(100) | Otu022047 | 0 | 0 | 0.000109075043630017 | 0                   | 0                    |
| Dysgonomonas(100) | Otu022049 | 0 | 0 | 0.000109075043630017 | 0                   | 0                    |
| Dysgonomonas(100) | Otu022066 | 0 | 0 | 0                    | 0                   | 0.000110387459984546 |
| Dysgonomonas(100) | Otu022069 | 0 | 0 | 0                    | 0.00012482836100362 | 0                    |
| Dysgonomonas(100) | Otu022084 | 0 | 0 | 0.000109075043630017 | 0                   | 0                    |
| Dysgonomonas(100) | Otu022090 | 0 | 0 | 0.000109075043630017 | 0                   | 0                    |
| Dysgonomonas(100) | Otu022094 | 0 | 0 | 0.000109075043630017 | 0                   | 0                    |
| Dysgonomonas(100) | Otu022107 | 0 | 0 | 0                    | 0.00012482836100362 | 0                    |
| Dysgonomonas(100) | Otu022125 | 0 | 0 | 0                    | 0                   | 0.000110387459984546 |
| Dysgonomonas(100) | Otu022126 | 0 | 0 | 0                    | 0                   | 0.000110387459984546 |
| Dysgonomonas(100) | Otu022128 | 0 | 0 | 0                    | 0                   | 0.000110387459984546 |
| Dysgonomonas(100) | Otu022129 | 0 | 0 | 0                    | 0                   | 0.000110387459984546 |
| unclassified(100) | Otu022138 | 0 | 0 | 0                    | 0                   | 0.000110387459984546 |
| Dysgonomonas(100) | Otu022139 | 0 | 0 | 0                    | 0                   | 0.000110387459984546 |
| Dysgonomonas(100) | Otu022140 | 0 | 0 | 0                    | 0                   | 0.000110387459984546 |
| Dysgonomonas(100) | Otu022144 | 0 | 0 | 0                    | 0.00012482836100362 | 0                    |
| Dysgonomonas(100) | Otu022153 | 0 | 0 | 0                    | 0.00012482836100362 | 0                    |



|                    |           |   |                      |                      |                     |                      |
|--------------------|-----------|---|----------------------|----------------------|---------------------|----------------------|
| Dysgonomonas(100)  | Otu022220 | 0 | 0                    | 0.000109075043630017 | 0                   | 0                    |
| Dysgonomonas(100)  | Otu022223 | 0 | 0                    | 0.000109075043630017 | 0                   | 0                    |
| Dysgonomonas(100)  | Otu022224 | 0 | 0                    | 0.000109075043630017 | 0                   | 0                    |
| Dysgonomonas(100)  | Otu022228 | 0 | 0                    | 0.000109075043630017 | 0                   | 0                    |
| Dysgonomonas(100)  | Otu022233 | 0 | 0                    | 0.000109075043630017 | 0                   | 0                    |
| Dysgonomonas(100)  | Otu022241 | 0 | 0                    | 0.000109075043630017 | 0                   | 0                    |
| Dysgonomonas(100)  | Otu022244 | 0 | 0                    | 0.000109075043630017 | 0                   | 0                    |
| Dysgonomonas(100)  | Otu022258 | 0 | 0                    | 0.000109075043630017 | 0                   | 0                    |
| Dysgonomonas(100)  | Otu022261 | 0 | 0                    | 0.000109075043630017 | 0                   | 0                    |
| Dysgonomonas(100)  | Otu022263 | 0 | 0                    | 0.000109075043630017 | 0                   | 0                    |
| Dysgonomonas(100)  | Otu022266 | 0 | 0                    | 0.000109075043630017 | 0                   | 0                    |
| Dysgonomonas(100)  | Otu022992 | 0 | 0                    | 0                    | 0                   | 0.000110387459984546 |
| Dysgonomonas(100)  | Otu022993 | 0 | 0                    | 0                    | 0                   | 0.000110387459984546 |
| Dysgonomonas(100)  | Otu023007 | 0 | 0                    | 0                    | 0                   | 0.000110387459984546 |
| Dysgonomonas(100)  | Otu023013 | 0 | 0                    | 0                    | 0                   | 0.000110387459984546 |
| Dysgonomonas(100)  | Otu023014 | 0 | 0                    | 0                    | 0                   | 0.000110387459984546 |
| Dysgonomonas(100)  | Otu023015 | 0 | 0                    | 0                    | 0                   | 0.000110387459984546 |
| Dysgonomonas(100)  | Otu023022 | 0 | 0                    | 0                    | 0                   | 0.000110387459984546 |
| unclassified(100)  | Otu023026 | 0 | 0                    | 0                    | 0                   | 0.000110387459984546 |
| Dysgonomonas(100)  | Otu023034 | 0 | 0                    | 0                    | 0                   | 0.000110387459984546 |
| Dysgonomonas(100)  | Otu023036 | 0 | 0                    | 0                    | 0                   | 0.000110387459984546 |
| Streptococcus(100) | Otu023322 | 0 | 0                    | 0                    | 0                   | 0.000110387459984546 |
| Streptococcus(100) | Otu023326 | 0 | 0                    | 0                    | 0                   | 0.000110387459984546 |
| Streptococcus(100) | Otu023331 | 0 | 0                    | 0                    | 0                   | 0.000110387459984546 |
| Streptococcus(100) | Otu023334 | 0 | 0                    | 0                    | 0                   | 0.000110387459984546 |
| Streptococcus(100) | Otu023353 | 0 | 0.000124968757810547 | 0                    | 0                   | 0                    |
| Streptococcus(100) | Otu023355 | 0 | 0.000124968757810547 | 0                    | 0                   | 0                    |
| Streptococcus(100) | Otu023361 | 0 | 0.000124968757810547 | 0                    | 0                   | 0                    |
| Streptococcus(100) | Otu023377 | 0 | 0                    | 0                    | 0                   | 0.000110387459984546 |
| Streptococcus(100) | Otu023390 | 0 | 0                    | 0                    | 0                   | 0.000110387459984546 |
| Streptococcus(100) | Otu023682 | 0 | 0                    | 0                    | 0.00012482836100362 | 0                    |
| Streptococcus(100) | Otu023689 | 0 | 0                    | 0                    | 0.00012482836100362 | 0                    |
| Streptococcus(100) | Otu023708 | 0 | 0                    | 0                    | 0.00012482836100362 | 0                    |

|                       |           |                       |                      |                      |                     |                      |
|-----------------------|-----------|-----------------------|----------------------|----------------------|---------------------|----------------------|
| Streptococcus(100)    | Otu023713 | 0                     | 0                    | 0.000109075043630017 | 0                   | 0                    |
| Streptococcus(100)    | Otu023721 | 0                     | 0                    | 0                    | 0.00012482836100362 | 0                    |
| unclassified(100)     | Otu023723 | 0                     | 0                    | 0                    | 0.00012482836100362 | 0                    |
| Streptococcus(100)    | Otu023725 | 0                     | 0                    | 0                    | 0.00012482836100362 | 0                    |
| Streptococcus(100)    | Otu023731 | 0                     | 0                    | 0                    | 0.00012482836100362 | 0                    |
| Streptococcus(100)    | Otu023734 | 0                     | 0                    | 0                    | 0.00012482836100362 | 0                    |
| Streptococcus(100)    | Otu023738 | 0                     | 0                    | 0                    | 0.00012482836100362 | 0                    |
| Streptococcus(100)    | Otu023767 | 0                     | 0                    | 0                    | 0                   | 0.00077271221989182  |
| Streptococcus(100)    | Otu023784 | 0                     | 0                    | 0                    | 0.00012482836100362 | 0                    |
| Streptococcus(100)    | Otu023872 | 0                     | 0.000124968757810547 | 0                    | 0                   | 0                    |
| Streptococcus(100)    | Otu023888 | 0                     | 0                    | 0.000109075043630017 | 0                   | 0                    |
| Streptococcus(100)    | Otu023995 | 0.0000778513040093422 | 0                    | 0                    | 0                   | 0                    |
| Streptococcus(100)    | Otu024001 | 0.0000778513040093422 | 0                    | 0                    | 0                   | 0                    |
| Streptococcus(100)    | Otu024838 | 0                     | 0                    | 0                    | 0                   | 0.000110387459984546 |
| Pedobacter(100)       | Otu025128 | 0                     | 0.000124968757810547 | 0                    | 0                   | 0                    |
| Pedobacter(100)       | Otu025150 | 0                     | 0.000124968757810547 | 0                    | 0                   | 0                    |
| Pedobacter(100)       | Otu025157 | 0                     | 0.000124968757810547 | 0                    | 0                   | 0                    |
| Pedobacter(100)       | Otu025175 | 0                     | 0.000124968757810547 | 0                    | 0                   | 0                    |
| Pedobacter(100)       | Otu025179 | 0                     | 0.000124968757810547 | 0                    | 0                   | 0                    |
| Pedobacter(100)       | Otu025405 | 0                     | 0                    | 0.000109075043630017 | 0                   | 0                    |
| Pedobacter(100)       | Otu025443 | 0                     | 0.000124968757810547 | 0                    | 0                   | 0                    |
| Pedobacter(100)       | Otu025457 | 0                     | 0                    | 0                    | 0.00012482836100362 | 0                    |
| Ralstonia(100)        | Otu025750 | 0.0000778513040093422 | 0                    | 0                    | 0                   | 0                    |
| Ralstonia(100)        | Otu025752 | 0.0000778513040093422 | 0                    | 0                    | 0                   | 0                    |
| Polynucleobacter(100) | Otu025759 | 0                     | 0.000124968757810547 | 0                    | 0                   | 0                    |
| unclassified(100)     | Otu025762 | 0                     | 0                    | 0                    | 0                   | 0.000110387459984546 |
| unclassified(100)     | Otu025765 | 0                     | 0                    | 0                    | 0                   | 0.000110387459984546 |
| unclassified(100)     | Otu025823 | 0                     | 0.000124968757810547 | 0                    | 0                   | 0                    |
| Pedobacter(100)       | Otu026703 | 0                     | 0.000124968757810547 | 0                    | 0                   | 0                    |
| Pedobacter(100)       | Otu026706 | 0                     | 0.000124968757810547 | 0                    | 0                   | 0                    |
| unclassified(100)     | Otu026735 | 0                     | 0                    | 0                    | 0.00012482836100362 | 0                    |
| Sphingobacterium(100) | Otu026767 | 0                     | 0                    | 0                    | 0.00012482836100362 | 0                    |
| Pedobacter(100)       | Otu026774 | 0                     | 0                    | 0                    | 0                   | 0.000110387459984546 |

|                   |           |   |                      |                      |                     |                      |
|-------------------|-----------|---|----------------------|----------------------|---------------------|----------------------|
| Pedobacter(100)   | Otu026809 | 0 | 0                    | 0                    | 0.00012482836100362 | 0                    |
| unclassified(100) | Otu027081 | 0 | 0                    | 0.000109075043630017 | 0                   | 0                    |
| unclassified(100) | Otu027110 | 0 | 0.000124968757810547 | 0                    | 0                   | 0                    |
| unclassified(100) | Otu027138 | 0 | 0                    | 0                    | 0.00012482836100362 | 0                    |
| unclassified(100) | Otu027167 | 0 | 0                    | 0.000109075043630017 | 0                   | 0                    |
| unclassified(100) | Otu027219 | 0 | 0.000124968757810547 | 0                    | 0                   | 0                    |
| unclassified(100) | Otu027256 | 0 | 0                    | 0                    | 0.00012482836100362 | 0                    |
| unclassified(100) | Otu027258 | 0 | 0                    | 0                    | 0.00012482836100362 | 0                    |
| unclassified(100) | Otu027265 | 0 | 0                    | 0                    | 0.00012482836100362 | 0                    |
| unclassified(100) | Otu027275 | 0 | 0                    | 0                    | 0.00012482836100362 | 0                    |
| unclassified(100) | Otu027280 | 0 | 0                    | 0                    | 0.00012482836100362 | 0                    |
| unclassified(100) | Otu027292 | 0 | 0                    | 0                    | 0.00012482836100362 | 0                    |
| unclassified(100) | Otu027295 | 0 | 0                    | 0                    | 0.00012482836100362 | 0                    |
| unclassified(100) | Otu027344 | 0 | 0                    | 0                    | 0                   | 0.000110387459984546 |
| unclassified(100) | Otu027360 | 0 | 0                    | 0                    | 0                   | 0.000110387459984546 |
| unclassified(100) | Otu027381 | 0 | 0                    | 0                    | 0.00012482836100362 | 0                    |
| unclassified(100) | Otu027412 | 0 | 0                    | 0                    | 0.00012482836100362 | 0                    |
| unclassified(100) | Otu027419 | 0 | 0                    | 0                    | 0.00012482836100362 | 0                    |
| unclassified(100) | Otu027435 | 0 | 0                    | 0                    | 0.00012482836100362 | 0                    |
| unclassified(100) | Otu027494 | 0 | 0                    | 0                    | 0.00012482836100362 | 0                    |
| unclassified(100) | Otu027513 | 0 | 0                    | 0                    | 0.00012482836100362 | 0                    |
| unclassified(100) | Otu027539 | 0 | 0                    | 0                    | 0                   | 0.000110387459984546 |
| unclassified(100) | Otu027548 | 0 | 0                    | 0                    | 0.00012482836100362 | 0                    |
| unclassified(100) | Otu027550 | 0 | 0                    | 0                    | 0.00012482836100362 | 0                    |
| unclassified(100) | Otu027552 | 0 | 0                    | 0                    | 0.00012482836100362 | 0                    |
| unclassified(100) | Otu027560 | 0 | 0                    | 0                    | 0                   | 0.000110387459984546 |
| unclassified(100) | Otu027562 | 0 | 0                    | 0                    | 0                   | 0.000110387459984546 |
| unclassified(100) | Otu027567 | 0 | 0                    | 0                    | 0.00012482836100362 | 0                    |
| unclassified(100) | Otu027573 | 0 | 0                    | 0                    | 0                   | 0.000110387459984546 |
| unclassified(100) | Otu027574 | 0 | 0                    | 0                    | 0                   | 0.000110387459984546 |
| unclassified(100) | Otu027624 | 0 | 0                    | 0                    | 0                   | 0.000110387459984546 |
| unclassified(100) | Otu027816 | 0 | 0.000124968757810547 | 0                    | 0                   | 0                    |
| unclassified(100) | Otu027824 | 0 | 0.000124968757810547 | 0                    | 0                   | 0                    |

|                           |           |                       |                      |                      |                     |                      |
|---------------------------|-----------|-----------------------|----------------------|----------------------|---------------------|----------------------|
| unclassified(100)         | Otu027830 | 0                     | 0.000124968757810547 | 0                    | 0                   | 0                    |
| unclassified(100)         | Otu027840 | 0                     | 0.000124968757810547 | 0                    | 0                   | 0                    |
| unclassified(100)         | Otu027886 | 0                     | 0.000124968757810547 | 0                    | 0                   | 0                    |
| unclassified(100)         | Otu027910 | 0                     | 0.000124968757810547 | 0                    | 0                   | 0                    |
| unclassified(100)         | Otu027916 | 0                     | 0.000124968757810547 | 0                    | 0                   | 0                    |
| unclassified(100)         | Otu027920 | 0                     | 0.000124968757810547 | 0                    | 0                   | 0                    |
| unclassified(100)         | Otu027924 | 0                     | 0.000124968757810547 | 0                    | 0                   | 0                    |
| unclassified(100)         | Otu027928 | 0                     | 0.000124968757810547 | 0                    | 0                   | 0                    |
| unclassified(100)         | Otu027930 | 0                     | 0.000124968757810547 | 0                    | 0                   | 0                    |
| unclassified(100)         | Otu027934 | 0                     | 0                    | 0                    | 0                   | 0.000110387459984546 |
| unclassified(100)         | Otu027943 | 0                     | 0                    | 0                    | 0                   | 0.000110387459984546 |
| unclassified(100)         | Otu027986 | 0                     | 0.000124968757810547 | 0                    | 0                   | 0                    |
| unclassified(100)         | Otu027988 | 0                     | 0.000124968757810547 | 0                    | 0                   | 0                    |
| unclassified(100)         | Otu028005 | 0                     | 0.000124968757810547 | 0                    | 0                   | 0                    |
| unclassified(100)         | Otu028009 | 0                     | 0.000124968757810547 | 0                    | 0                   | 0                    |
| unclassified(100)         | Otu028311 | 0                     | 0.000124968757810547 | 0                    | 0                   | 0                    |
| unclassified(100)         | Otu028320 | 0.0000778513040093422 | 0                    | 0                    | 0                   | 0                    |
| unclassified(100)         | Otu028332 | 0                     | 0.000124968757810547 | 0                    | 0                   | 0                    |
| unclassified(100)         | Otu028379 | 0                     | 0.000124968757810547 | 0                    | 0                   | 0                    |
| unclassified(100)         | Otu028398 | 0                     | 0.000124968757810547 | 0                    | 0                   | 0                    |
| unclassified(100)         | Otu028406 | 0                     | 0.000124968757810547 | 0                    | 0                   | 0                    |
| Escherichia-Shigella(100) | Otu028407 | 0                     | 0.000124968757810547 | 0                    | 0                   | 0                    |
| unclassified(100)         | Otu028628 | 0                     | 0                    | 0.000109075043630017 | 0                   | 0                    |
| Ewingella(100)            | Otu028634 | 0                     | 0                    | 0.000109075043630017 | 0                   | 0                    |
| unclassified(100)         | Otu028636 | 0                     | 0                    | 0.000109075043630017 | 0                   | 0                    |
| unclassified(100)         | Otu028644 | 0                     | 0                    | 0.000109075043630017 | 0                   | 0                    |
| unclassified(100)         | Otu028665 | 0                     | 0                    | 0.000109075043630017 | 0                   | 0                    |
| unclassified(100)         | Otu028668 | 0                     | 0                    | 0.000109075043630017 | 0                   | 0                    |
| unclassified(100)         | Otu028671 | 0                     | 0                    | 0.000109075043630017 | 0                   | 0                    |
| unclassified(100)         | Otu028680 | 0                     | 0                    | 0                    | 0.00012482836100362 | 0                    |
| unclassified(100)         | Otu028722 | 0                     | 0                    | 0.000109075043630017 | 0                   | 0                    |
| unclassified(100)         | Otu028729 | 0                     | 0                    | 0                    | 0.00012482836100362 | 0                    |
| unclassified(100)         | Otu028734 | 0                     | 0                    | 0.000109075043630017 | 0                   | 0                    |

|                     |           |                       |                      |                      |                     |                      |
|---------------------|-----------|-----------------------|----------------------|----------------------|---------------------|----------------------|
| unclassified(100)   | Otu029111 | 0                     | 0.000124968757810547 | 0                    | 0                   | 0                    |
| unclassified(100)   | Otu029113 | 0                     | 0                    | 0                    | 0.00012482836100362 | 0                    |
| unclassified(100)   | Otu029120 | 0                     | 0                    | 0                    | 0.00012482836100362 | 0                    |
| unclassified(100)   | Otu029122 | 0                     | 0                    | 0                    | 0.00012482836100362 | 0                    |
| unclassified(100)   | Otu029125 | 0                     | 0                    | 0                    | 0.00012482836100362 | 0                    |
| unclassified(100)   | Otu029168 | 0                     | 0                    | 0                    | 0.00012482836100362 | 0                    |
| unclassified(100)   | Otu029179 | 0                     | 0                    | 0                    | 0                   | 0.000110387459984546 |
| unclassified(100)   | Otu029203 | 0                     | 0.000124968757810547 | 0                    | 0                   | 0                    |
| unclassified(100)   | Otu029210 | 0                     | 0                    | 0                    | 0                   | 0.000110387459984546 |
| unclassified(100)   | Otu029672 | 0.0000778513040093422 | 0                    | 0                    | 0                   | 0                    |
| unclassified(100)   | Otu029699 | 0                     | 0.000124968757810547 | 0                    | 0                   | 0                    |
| unclassified(100)   | Otu034823 | 0                     | 0                    | 0                    | 0                   | 0.000110387459984546 |
| Hyphomicrobium(100) | Otu035288 | 0                     | 0                    | 0                    | 0.00012482836100362 | 0                    |
| Hyphomicrobium(100) | Otu035293 | 0                     | 0                    | 0.000109075043630017 | 0                   | 0                    |
| Hyphomicrobium(100) | Otu035313 | 0                     | 0                    | 0                    | 0                   | 0.000110387459984546 |
| Hyphomicrobium(100) | Otu035442 | 0                     | 0                    | 0                    | 0                   | 0.000110387459984546 |
| Devosia(100)        | Otu035445 | 0                     | 0.000124968757810547 | 0                    | 0                   | 0                    |
| Hyphomicrobium(100) | Otu035460 | 0                     | 0                    | 0.000109075043630017 | 0                   | 0                    |
| Hyphomicrobium(100) | Otu035486 | 0.0000778513040093422 | 0                    | 0                    | 0                   | 0                    |
| Hyphomicrobium(100) | Otu035489 | 0.0000778513040093422 | 0                    | 0                    | 0                   | 0                    |
| unclassified(100)   | Otu035492 | 0.0000778513040093422 | 0                    | 0                    | 0                   | 0                    |
| unclassified(100)   | Otu035523 | 0                     | 0                    | 0                    | 0.00012482836100362 | 0                    |
| unclassified(100)   | Otu035526 | 0.0000778513040093422 | 0                    | 0                    | 0                   | 0                    |
| unclassified(100)   | Otu035527 | 0.0000778513040093422 | 0                    | 0                    | 0                   | 0                    |
| unclassified(100)   | Otu035585 | 0                     | 0                    | 0                    | 0.00012482836100362 | 0                    |
| unclassified(100)   | Otu035591 | 0                     | 0.000124968757810547 | 0                    | 0                   | 0                    |
| unclassified(100)   | Otu035594 | 0                     | 0.000124968757810547 | 0                    | 0                   | 0                    |
| unclassified(100)   | Otu035595 | 0                     | 0                    | 0.000109075043630017 | 0                   | 0                    |
| Gemella(100)        | Otu035622 | 0                     | 0                    | 0                    | 0.00012482836100362 | 0                    |
| Gemella(100)        | Otu035631 | 0                     | 0                    | 0                    | 0.00012482836100362 | 0                    |
| Gemella(100)        | Otu035636 | 0                     | 0                    | 0                    | 0                   | 0.000110387459984546 |
| Gemella(100)        | Otu035641 | 0                     | 0                    | 0.000109075043630017 | 0                   | 0                    |
| unclassified(100)   | Otu035803 | 0.0000778513040093422 | 0                    | 0                    | 0                   | 0                    |

|                    |           |                       |                      |                      |                     |                      |
|--------------------|-----------|-----------------------|----------------------|----------------------|---------------------|----------------------|
| unclassified(100)  | Otu035804 | 0.0000778513040093422 | 0                    | 0                    | 0                   | 0                    |
| unclassified(100)  | Otu035850 | 0.0000778513040093422 | 0                    | 0                    | 0                   | 0                    |
| unclassified(100)  | Otu035851 | 0.0000778513040093422 | 0                    | 0                    | 0                   | 0                    |
| unclassified(100)  | Otu036061 | 0                     | 0                    | 0                    | 0                   | 0.000110387459984546 |
| unclassified(100)  | Otu036105 | 0.0000778513040093422 | 0                    | 0                    | 0                   | 0                    |
| unclassified(100)  | Otu036118 | 0.0000778513040093422 | 0                    | 0                    | 0                   | 0                    |
| unclassified(100)  | Otu036119 | 0.0000778513040093422 | 0                    | 0                    | 0                   | 0                    |
| unclassified(100)  | Otu036120 | 0.0000778513040093422 | 0                    | 0                    | 0                   | 0                    |
| Ralstonia(100)     | Otu036122 | 0.0000778513040093422 | 0                    | 0                    | 0                   | 0                    |
| Ralstonia(100)     | Otu036123 | 0.0000778513040093422 | 0                    | 0                    | 0                   | 0                    |
| unclassified(100)  | Otu036128 | 0                     | 0                    | 0.000109075043630017 | 0                   | 0                    |
| unclassified(100)  | Otu036130 | 0                     | 0                    | 0.000109075043630017 | 0                   | 0                    |
| unclassified(100)  | Otu036131 | 0                     | 0                    | 0.000109075043630017 | 0                   | 0                    |
| unclassified(100)  | Otu036138 | 0.0000778513040093422 | 0                    | 0                    | 0                   | 0                    |
| unclassified(100)  | Otu036140 | 0.0000778513040093422 | 0                    | 0                    | 0                   | 0                    |
| Ralstonia(100)     | Otu036143 | 0                     | 0                    | 0.000109075043630017 | 0                   | 0                    |
| unclassified(100)  | Otu036144 | 0                     | 0                    | 0.000109075043630017 | 0                   | 0                    |
| unclassified(100)  | Otu036145 | 0                     | 0                    | 0.000109075043630017 | 0                   | 0                    |
| unclassified(100)  | Otu036148 | 0                     | 0.000124968757810547 | 0                    | 0                   | 0                    |
| Limnobacter(100)   | Otu036149 | 0                     | 0                    | 0                    | 0.00012482836100362 | 0                    |
| Ralstonia(100)     | Otu036150 | 0                     | 0                    | 0                    | 0.00012482836100362 | 0                    |
| unclassified(100)  | Otu036157 | 0                     | 0                    | 0                    | 0                   | 0.000110387459984546 |
| unclassified(100)  | Otu036161 | 0                     | 0                    | 0                    | 0                   | 0.000110387459984546 |
| Anaerococcus(100)  | Otu036345 | 0                     | 0.000124968757810547 | 0                    | 0                   | 0                    |
| Finegoldia(100)    | Otu036355 | 0                     | 0.000124968757810547 | 0                    | 0                   | 0                    |
| Anaerococcus(100)  | Otu036363 | 0                     | 0                    | 0                    | 0.00012482836100362 | 0                    |
| Anaerococcus(100)  | Otu036364 | 0                     | 0                    | 0                    | 0.00012482836100362 | 0                    |
| Peptoniphilus(100) | Otu036399 | 0                     | 0.000124968757810547 | 0                    | 0                   | 0                    |
| Anaerococcus(100)  | Otu036405 | 0                     | 0                    | 0                    | 0.00012482836100362 | 0                    |
| Anaerococcus(100)  | Otu036409 | 0                     | 0                    | 0                    | 0.00012482836100362 | 0                    |
| Anaerococcus(100)  | Otu036411 | 0                     | 0                    | 0                    | 0                   | 0.000110387459984546 |
| Anaerococcus(100)  | Otu036422 | 0                     | 0                    | 0                    | 0.00012482836100362 | 0                    |
| Finegoldia(100)    | Otu036449 | 0                     | 0                    | 0                    | 0                   | 0.000110387459984546 |

|                    |           |                       |                      |                      |                     |                      |
|--------------------|-----------|-----------------------|----------------------|----------------------|---------------------|----------------------|
| Prevotella(100)    | Otu036598 | 0                     | 0                    | 0.000109075043630017 | 0                   | 0                    |
| Prevotella(100)    | Otu036610 | 0                     | 0                    | 0.000327225130890052 | 0                   | 0                    |
| Prevotella(100)    | Otu036612 | 0                     | 0                    | 0.000109075043630017 | 0                   | 0                    |
| Prevotella(100)    | Otu036678 | 0                     | 0                    | 0                    | 0                   | 0.000110387459984546 |
| Prevotella(100)    | Otu036679 | 0                     | 0                    | 0                    | 0                   | 0.000110387459984546 |
| Prevotella(100)    | Otu036680 | 0                     | 0                    | 0                    | 0                   | 0.000110387459984546 |
| unclassified(100)  | Otu037718 | 0                     | 0                    | 0                    | 0.00012482836100362 | 0                    |
| unclassified(100)  | Otu037725 | 0                     | 0                    | 0.000109075043630017 | 0                   | 0                    |
| unclassified(100)  | Otu037824 | 0                     | 0                    | 0                    | 0.00012482836100362 | 0                    |
| unclassified(100)  | Otu037826 | 0                     | 0                    | 0                    | 0                   | 0.000110387459984546 |
| unclassified(100)  | Otu037827 | 0                     | 0                    | 0                    | 0                   | 0.000110387459984546 |
| Reyranella(100)    | Otu038043 | 0.0000778513040093422 | 0                    | 0                    | 0                   | 0                    |
| unclassified(100)  | Otu038107 | 0                     | 0                    | 0                    | 0                   | 0.000110387459984546 |
| unclassified(100)  | Otu038117 | 0                     | 0                    | 0                    | 0                   | 0.000441549839938183 |
| Treponema(100)     | Otu038118 | 0                     | 0                    | 0                    | 0                   | 0.000662324759907275 |
| unclassified(100)  | Otu038288 | 0                     | 0.000499875031242189 | 0.000218150087260035 | 0.00074897016602172 | 0.00121426205983     |
| unclassified(100)  | Otu038311 | 0                     | 0                    | 0                    | 0.00037448508301086 | 0                    |
| Blastocatella(100) | Otu038383 | 0.0000778513040093422 | 0                    | 0                    | 0                   | 0                    |
| uncultured(100)    | Otu038416 | 0                     | 0                    | 0.000109075043630017 | 0                   | 0                    |
| unclassified(100)  | Otu038431 | 0                     | 0                    | 0.000109075043630017 | 0                   | 0                    |
| uncultured(100)    | Otu038432 | 0                     | 0                    | 0                    | 0                   | 0.000110387459984546 |
| Halomonas(100)     | Otu038457 | 0                     | 0                    | 0                    | 0.00012482836100362 | 0                    |
| Rheinheimera(100)  | Otu038515 | 0                     | 0                    | 0.000109075043630017 | 0                   | 0                    |
| unclassified(100)  | Otu038538 | 0                     | 0                    | 0                    | 0                   | 0.000331162379953637 |
| SM1A02(100)        | Otu038549 | 0                     | 0                    | 0.000109075043630017 | 0                   | 0                    |
| unclassified(100)  | Otu038578 | 0                     | 0.000124968757810547 | 0                    | 0                   | 0                    |
| unclassified(100)  | Otu038637 | 0                     | 0.000124968757810547 | 0                    | 0                   | 0                    |
| unclassified(100)  | Otu038658 | 0                     | 0.000124968757810547 | 0                    | 0                   | 0                    |
| unclassified(100)  | Otu038664 | 0                     | 0                    | 0                    | 0                   | 0.000110387459984546 |
| unclassified(100)  | Otu038665 | 0                     | 0                    | 0                    | 0                   | 0.000110387459984546 |
| unclassified(100)  | Otu038666 | 0.0000778513040093422 | 0                    | 0                    | 0                   | 0                    |
| unclassified(100)  | Otu038667 | 0                     | 0                    | 0                    | 0                   | 0.000110387459984546 |
| unclassified(100)  | Otu038668 | 0                     | 0                    | 0                    | 0                   | 0.000110387459984546 |

|                   |           |                       |                      |                      |                     |                      |
|-------------------|-----------|-----------------------|----------------------|----------------------|---------------------|----------------------|
| unclassified(100) | Otu038673 | 0                     | 0                    | 0                    | 0                   | 0.000110387459984546 |
| unclassified(100) | Otu038675 | 0                     | 0                    | 0                    | 0                   | 0.000110387459984546 |
| unclassified(100) | Otu038679 | 0                     | 0                    | 0                    | 0                   | 0.000110387459984546 |
| unclassified(100) | Otu038683 | 0                     | 0                    | 0                    | 0                   | 0.000110387459984546 |
| unclassified(100) | Otu038684 | 0                     | 0                    | 0                    | 0                   | 0.000110387459984546 |
| unclassified(100) | Otu038696 | 0                     | 0.000124968757810547 | 0                    | 0                   | 0                    |
| unclassified(100) | Otu038704 | 0                     | 0.000124968757810547 | 0                    | 0                   | 0                    |
| unclassified(100) | Otu038705 | 0                     | 0.000124968757810547 | 0                    | 0                   | 0                    |
| unclassified(100) | Otu038706 | 0                     | 0.000124968757810547 | 0                    | 0                   | 0                    |
| unclassified(100) | Otu038709 | 0                     | 0.000124968757810547 | 0                    | 0                   | 0                    |
| unclassified(100) | Otu038712 | 0                     | 0                    | 0.000109075043630017 | 0                   | 0                    |
| unclassified(100) | Otu038714 | 0                     | 0                    | 0.000109075043630017 | 0                   | 0                    |
| unclassified(100) | Otu038719 | 0                     | 0                    | 0.000109075043630017 | 0                   | 0                    |
| unclassified(100) | Otu038721 | 0                     | 0.000124968757810547 | 0                    | 0                   | 0                    |
| unclassified(100) | Otu038732 | 0                     | 0.000124968757810547 | 0                    | 0                   | 0                    |
| unclassified(100) | Otu038739 | 0                     | 0.000124968757810547 | 0                    | 0                   | 0                    |
| unclassified(100) | Otu038740 | 0                     | 0.000124968757810547 | 0                    | 0                   | 0                    |
| unclassified(100) | Otu038750 | 0                     | 0.000124968757810547 | 0                    | 0                   | 0                    |
| unclassified(100) | Otu038754 | 0                     | 0.000124968757810547 | 0                    | 0                   | 0                    |
| unclassified(100) | Otu038758 | 0                     | 0                    | 0                    | 0                   | 0.000110387459984546 |
| unclassified(100) | Otu038759 | 0                     | 0                    | 0                    | 0                   | 0.000110387459984546 |
| unclassified(100) | Otu038760 | 0                     | 0                    | 0                    | 0                   | 0.000110387459984546 |
| unclassified(100) | Otu038763 | 0                     | 0                    | 0                    | 0                   | 0.000110387459984546 |
| unclassified(100) | Otu038764 | 0.0000778513040093422 | 0                    | 0                    | 0                   | 0                    |
| unclassified(100) | Otu038766 | 0                     | 0                    | 0                    | 0                   | 0.000110387459984546 |
| unclassified(100) | Otu038768 | 0                     | 0                    | 0                    | 0                   | 0.000110387459984546 |
| unclassified(100) | Otu038781 | 0                     | 0                    | 0                    | 0                   | 0.000110387459984546 |
| unclassified(100) | Otu038784 | 0.0000778513040093422 | 0                    | 0                    | 0                   | 0                    |
| unclassified(100) | Otu038785 | 0                     | 0                    | 0                    | 0                   | 0.000110387459984546 |
| unclassified(100) | Otu038787 | 0                     | 0                    | 0                    | 0                   | 0.000110387459984546 |
| unclassified(100) | Otu038792 | 0                     | 0                    | 0                    | 0.00012482836100362 | 0                    |
| unclassified(100) | Otu038795 | 0                     | 0                    | 0                    | 0                   | 0.000110387459984546 |
| unclassified(100) | Otu038796 | 0                     | 0                    | 0                    | 0                   | 0.000110387459984546 |



|                   |           |                       |                      |   |   |                      |
|-------------------|-----------|-----------------------|----------------------|---|---|----------------------|
| unclassified(100) | Otu038801 | 0                     | 0                    | 0 | 0 | 0.000110387459984546 |
| unclassified(100) | Otu038805 | 0.0000778513040093422 | 0                    | 0 | 0 | 0                    |
| unclassified(100) | Otu038807 | 0                     | 0                    | 0 | 0 | 0.000110387459984546 |
| unclassified(100) | Otu038808 | 0.0000778513040093422 | 0                    | 0 | 0 | 0                    |
| unclassified(100) | Otu038809 | 0                     | 0                    | 0 | 0 | 0.000110387459984546 |
| unclassified(100) | Otu038838 | 0                     | 0                    | 0 | 0 | 0.000110387459984546 |
| unclassified(100) | Otu038845 | 0                     | 0                    | 0 | 0 | 0.000110387459984546 |
| unclassified(100) | Otu038847 | 0.0000778513040093422 | 0                    | 0 | 0 | 0                    |
| unclassified(100) | Otu038851 | 0                     | 0                    | 0 | 0 | 0.000110387459984546 |
| unclassified(100) | Otu038855 | 0                     | 0                    | 0 | 0 | 0.000110387459984546 |
| unclassified(100) | Otu038869 | 0                     | 0                    | 0 | 0 | 0.000110387459984546 |
| unclassified(100) | Otu038870 | 0                     | 0                    | 0 | 0 | 0.000110387459984546 |
| unclassified(100) | Otu038871 | 0                     | 0                    | 0 | 0 | 0.000110387459984546 |
| unclassified(100) | Otu038872 | 0.0000778513040093422 | 0                    | 0 | 0 | 0                    |
| unclassified(100) | Otu038874 | 0                     | 0                    | 0 | 0 | 0.000110387459984546 |
| unclassified(100) | Otu038875 | 0                     | 0                    | 0 | 0 | 0.000110387459984546 |
| unclassified(100) | Otu038888 | 0                     | 0.000124968757810547 | 0 | 0 | 0                    |
| unclassified(100) | Otu038889 | 0                     | 0.000124968757810547 | 0 | 0 | 0                    |
| unclassified(100) | Otu038913 | 0                     | 0.000124968757810547 | 0 | 0 | 0                    |
| unclassified(100) | Otu038921 | 0                     | 0.000124968757810547 | 0 | 0 | 0                    |
| unclassified(100) | Otu038922 | 0                     | 0.000124968757810547 | 0 | 0 | 0                    |
| unclassified(100) | Otu038924 | 0                     | 0.000124968757810547 | 0 | 0 | 0                    |
| unclassified(100) | Otu038929 | 0                     | 0.000124968757810547 | 0 | 0 | 0                    |
| unclassified(100) | Otu038940 | 0                     | 0.000124968757810547 | 0 | 0 | 0                    |
| unclassified(100) | Otu038987 | 0                     | 0.000124968757810547 | 0 | 0 | 0                    |
| unclassified(100) | Otu039004 | 0                     | 0.000124968757810547 | 0 | 0 | 0                    |
| unclassified(100) | Otu039005 | 0                     | 0.000124968757810547 | 0 | 0 | 0                    |
| unclassified(100) | Otu039012 | 0                     | 0.000124968757810547 | 0 | 0 | 0                    |
| unclassified(100) | Otu039016 | 0                     | 0.000124968757810547 | 0 | 0 | 0                    |
| unclassified(100) | Otu039020 | 0                     | 0.000124968757810547 | 0 | 0 | 0                    |
| unclassified(100) | Otu039021 | 0                     | 0.000124968757810547 | 0 | 0 | 0                    |
| unclassified(100) | Otu039026 | 0                     | 0.000124968757810547 | 0 | 0 | 0                    |
| unclassified(100) | Otu039027 | 0                     | 0.000124968757810547 | 0 | 0 | 0                    |

|                   |           |                       |                      |   |                     |                      |
|-------------------|-----------|-----------------------|----------------------|---|---------------------|----------------------|
| unclassified(100) | Otu039031 | 0                     | 0.000124968757810547 | 0 | 0                   | 0                    |
| unclassified(100) | Otu039032 | 0                     | 0.000124968757810547 | 0 | 0                   | 0                    |
| unclassified(100) | Otu039033 | 0                     | 0.000124968757810547 | 0 | 0                   | 0                    |
| unclassified(100) | Otu039037 | 0                     | 0.000124968757810547 | 0 | 0                   | 0                    |
| unclassified(100) | Otu039043 | 0                     | 0.000124968757810547 | 0 | 0                   | 0                    |
| unclassified(100) | Otu039052 | 0                     | 0.000124968757810547 | 0 | 0                   | 0                    |
| unclassified(100) | Otu039053 | 0                     | 0.000124968757810547 | 0 | 0                   | 0                    |
| unclassified(100) | Otu039082 | 0                     | 0.000124968757810547 | 0 | 0                   | 0                    |
| unclassified(100) | Otu039083 | 0                     | 0.000124968757810547 | 0 | 0                   | 0                    |
| unclassified(100) | Otu039090 | 0                     | 0.000124968757810547 | 0 | 0                   | 0                    |
| unclassified(100) | Otu039093 | 0                     | 0.000124968757810547 | 0 | 0                   | 0                    |
| unclassified(100) | Otu039096 | 0                     | 0.000124968757810547 | 0 | 0                   | 0                    |
| unclassified(100) | Otu039110 | 0                     | 0.000124968757810547 | 0 | 0                   | 0                    |
| unclassified(100) | Otu039111 | 0                     | 0.000124968757810547 | 0 | 0                   | 0                    |
| unclassified(100) | Otu039114 | 0                     | 0.000124968757810547 | 0 | 0                   | 0                    |
| unclassified(100) | Otu039222 | 0                     | 0                    | 0 | 0.00012482836100362 | 0                    |
| Terrimonas(100)   | Otu039229 | 0                     | 0                    | 0 | 0.00012482836100362 | 0                    |
| unclassified(100) | Otu039370 | 0                     | 0                    | 0 | 0.00012482836100362 | 0                    |
| unclassified(100) | Otu039371 | 0                     | 0                    | 0 | 0.00012482836100362 | 0                    |
| unclassified(100) | Otu039372 | 0                     | 0                    | 0 | 0.00012482836100362 | 0                    |
| unclassified(100) | Otu039383 | 0.0000778513040093422 | 0                    | 0 | 0                   | 0                    |
| unclassified(100) | Otu039390 | 0.0000778513040093422 | 0                    | 0 | 0                   | 0                    |
| unclassified(100) | Otu039392 | 0.0000778513040093422 | 0                    | 0 | 0                   | 0                    |
| unclassified(100) | Otu039395 | 0                     | 0                    | 0 | 0.00012482836100362 | 0                    |
| unclassified(100) | Otu039396 | 0                     | 0                    | 0 | 0.00012482836100362 | 0                    |
| unclassified(100) | Otu039399 | 0                     | 0                    | 0 | 0.00012482836100362 | 0                    |
| unclassified(100) | Otu039403 | 0.0000778513040093422 | 0                    | 0 | 0                   | 0                    |
| unclassified(100) | Otu039410 | 0.0000778513040093422 | 0                    | 0 | 0                   | 0                    |
| unclassified(100) | Otu039411 | 0                     | 0                    | 0 | 0.00012482836100362 | 0                    |
| unclassified(100) | Otu039413 | 0                     | 0                    | 0 | 0                   | 0.000110387459984546 |
| unclassified(100) | Otu039414 | 0                     | 0                    | 0 | 0                   | 0.000110387459984546 |
| unclassified(100) | Otu039416 | 0                     | 0                    | 0 | 0.00012482836100362 | 0                    |
| unclassified(100) | Otu039419 | 0                     | 0                    | 0 | 0.00012482836100362 | 0                    |

|                   |           |                       |                      |   |                     |                      |
|-------------------|-----------|-----------------------|----------------------|---|---------------------|----------------------|
| unclassified(100) | Otu039426 | 0                     | 0                    | 0 | 0                   | 0.000331162379953637 |
| unclassified(100) | Otu039428 | 0.0000778513040093422 | 0                    | 0 | 0                   | 0                    |
| unclassified(100) | Otu039430 | 0                     | 0                    | 0 | 0.00012482836100362 | 0                    |
| unclassified(100) | Otu039433 | 0                     | 0.000124968757810547 | 0 | 0                   | 0                    |
| unclassified(100) | Otu039435 | 0                     | 0.000124968757810547 | 0 | 0                   | 0                    |
| unclassified(100) | Otu039436 | 0                     | 0                    | 0 | 0                   | 0.000110387459984546 |
| unclassified(100) | Otu039439 | 0.0000778513040093422 | 0                    | 0 | 0                   | 0                    |
| unclassified(100) | Otu039441 | 0                     | 0                    | 0 | 0                   | 0.000110387459984546 |
| unclassified(100) | Otu039442 | 0                     | 0                    | 0 | 0                   | 0.000110387459984546 |
| unclassified(100) | Otu039443 | 0                     | 0                    | 0 | 0                   | 0.000110387459984546 |
| unclassified(100) | Otu039446 | 0                     | 0                    | 0 | 0                   | 0.000110387459984546 |
| unclassified(100) | Otu039447 | 0                     | 0                    | 0 | 0                   | 0.000110387459984546 |
| unclassified(100) | Otu039450 | 0                     | 0                    | 0 | 0                   | 0.000110387459984546 |
| unclassified(100) | Otu039455 | 0                     | 0                    | 0 | 0.00012482836100362 | 0                    |
| unclassified(100) | Otu039462 | 0                     | 0                    | 0 | 0                   | 0.000110387459984546 |
| unclassified(100) | Otu039465 | 0                     | 0.000124968757810547 | 0 | 0                   | 0                    |
| unclassified(100) | Otu039485 | 0                     | 0.000124968757810547 | 0 | 0                   | 0                    |
| unclassified(100) | Otu039578 | 0                     | 0                    | 0 | 0.00012482836100362 | 0                    |
| unclassified(100) | Otu039584 | 0                     | 0                    | 0 | 0                   | 0.000220774919969092 |
| unclassified(100) | Otu039600 | 0.0000778513040093422 | 0                    | 0 | 0                   | 0                    |
| unclassified(100) | Otu039740 | 0.0000778513040093422 | 0                    | 0 | 0                   | 0                    |
| unclassified(100) | Otu039849 | 0.0000778513040093422 | 0                    | 0 | 0                   | 0                    |
| unclassified(100) | Otu039865 | 0.0000778513040093422 | 0                    | 0 | 0                   | 0                    |
| unclassified(100) | Otu039867 | 0.0000778513040093422 | 0                    | 0 | 0                   | 0                    |
| unclassified(100) | Otu039868 | 0.0000778513040093422 | 0                    | 0 | 0                   | 0                    |
| unclassified(100) | Otu039870 | 0.0000778513040093422 | 0                    | 0 | 0                   | 0                    |
| unclassified(100) | Otu039890 | 0.0000778513040093422 | 0                    | 0 | 0                   | 0                    |
| unclassified(100) | Otu039892 | 0                     | 0                    | 0 | 0                   | 0.000110387459984546 |
| unclassified(100) | Otu039895 | 0                     | 0                    | 0 | 0                   | 0.000110387459984546 |
| unclassified(100) | Otu039896 | 0                     | 0                    | 0 | 0                   | 0.000110387459984546 |
| unclassified(100) | Otu039899 | 0                     | 0                    | 0 | 0                   | 0.000110387459984546 |
| unclassified(100) | Otu039902 | 0                     | 0                    | 0 | 0                   | 0.000110387459984546 |
| unclassified(100) | Otu039913 | 0                     | 0                    | 0 | 0                   | 0.000110387459984546 |

|                   |           |                       |   |   |                     |                      |
|-------------------|-----------|-----------------------|---|---|---------------------|----------------------|
| unclassified(100) | Otu039917 | 0                     | 0 | 0 | 0                   | 0.000110387459984546 |
| unclassified(100) | Otu039920 | 0                     | 0 | 0 | 0                   | 0.000110387459984546 |
| unclassified(100) | Otu039921 | 0.0000778513040093422 | 0 | 0 | 0                   | 0                    |
| unclassified(100) | Otu039937 | 0                     | 0 | 0 | 0                   | 0.000110387459984546 |
| unclassified(100) | Otu039941 | 0                     | 0 | 0 | 0                   | 0.000110387459984546 |
| unclassified(100) | Otu039943 | 0.0000778513040093422 | 0 | 0 | 0                   | 0                    |
| unclassified(100) | Otu039944 | 0                     | 0 | 0 | 0                   | 0.000110387459984546 |
| unclassified(100) | Otu039955 | 0.0000778513040093422 | 0 | 0 | 0                   | 0                    |
| unclassified(100) | Otu039961 | 0.0000778513040093422 | 0 | 0 | 0                   | 0                    |
| unclassified(100) | Otu039963 | 0.0000778513040093422 | 0 | 0 | 0                   | 0                    |
| unclassified(100) | Otu039985 | 0.0000778513040093422 | 0 | 0 | 0                   | 0                    |
| unclassified(100) | Otu040001 | 0                     | 0 | 0 | 0                   | 0.000110387459984546 |
| unclassified(100) | Otu040003 | 0                     | 0 | 0 | 0                   | 0.000110387459984546 |
| unclassified(100) | Otu040007 | 0.0000778513040093422 | 0 | 0 | 0                   | 0                    |
| unclassified(100) | Otu040011 | 0                     | 0 | 0 | 0                   | 0.000110387459984546 |
| unclassified(100) | Otu040012 | 0                     | 0 | 0 | 0                   | 0.000110387459984546 |
| unclassified(100) | Otu040014 | 0                     | 0 | 0 | 0                   | 0.000110387459984546 |
| unclassified(100) | Otu040034 | 0                     | 0 | 0 | 0                   | 0.000110387459984546 |
| unclassified(100) | Otu040037 | 0.0000778513040093422 | 0 | 0 | 0                   | 0                    |
| unclassified(100) | Otu040041 | 0.0000778513040093422 | 0 | 0 | 0                   | 0                    |
| unclassified(100) | Otu040052 | 0                     | 0 | 0 | 0                   | 0.000110387459984546 |
| unclassified(100) | Otu040055 | 0                     | 0 | 0 | 0                   | 0.000110387459984546 |
| unclassified(100) | Otu040059 | 0                     | 0 | 0 | 0                   | 0.000110387459984546 |
| unclassified(100) | Otu040063 | 0.0000778513040093422 | 0 | 0 | 0                   | 0                    |
| unclassified(100) | Otu040086 | 0                     | 0 | 0 | 0                   | 0.000110387459984546 |
| unclassified(100) | Otu040087 | 0                     | 0 | 0 | 0                   | 0.000110387459984546 |
| unclassified(100) | Otu040090 | 0                     | 0 | 0 | 0                   | 0.000110387459984546 |
| unclassified(100) | Otu040093 | 0                     | 0 | 0 | 0                   | 0.000110387459984546 |
| unclassified(100) | Otu040096 | 0                     | 0 | 0 | 0                   | 0.000110387459984546 |
| unclassified(100) | Otu040097 | 0                     | 0 | 0 | 0                   | 0.000110387459984546 |
| unclassified(100) | Otu040099 | 0                     | 0 | 0 | 0                   | 0.000110387459984546 |
| unclassified(100) | Otu040102 | 0                     | 0 | 0 | 0                   | 0.000110387459984546 |
| unclassified(100) | Otu040173 | 0                     | 0 | 0 | 0.00012482836100362 | 0                    |

|                   |           |                       |   |   |                     |   |
|-------------------|-----------|-----------------------|---|---|---------------------|---|
| unclassified(100) | Otu040181 | 0.0000778513040093422 | 0 | 0 | 0                   | 0 |
| unclassified(100) | Otu040192 | 0.0000778513040093422 | 0 | 0 | 0                   | 0 |
| unclassified(100) | Otu040194 | 0                     | 0 | 0 | 0.00012482836100362 | 0 |
| unclassified(100) | Otu040195 | 0                     | 0 | 0 | 0.00012482836100362 | 0 |
| unclassified(100) | Otu040220 | 0.0000778513040093422 | 0 | 0 | 0                   | 0 |
| unclassified(100) | Otu040223 | 0                     | 0 | 0 | 0.00012482836100362 | 0 |
| unclassified(100) | Otu040224 | 0                     | 0 | 0 | 0.00012482836100362 | 0 |
| unclassified(100) | Otu040225 | 0                     | 0 | 0 | 0.00012482836100362 | 0 |
| unclassified(100) | Otu040260 | 0                     | 0 | 0 | 0.00012482836100362 | 0 |
| unclassified(100) | Otu040261 | 0                     | 0 | 0 | 0.00012482836100362 | 0 |
| unclassified(100) | Otu040278 | 0                     | 0 | 0 | 0.00012482836100362 | 0 |
| unclassified(100) | Otu040279 | 0                     | 0 | 0 | 0.00012482836100362 | 0 |
| unclassified(100) | Otu040288 | 0.0000778513040093422 | 0 | 0 | 0                   | 0 |
| unclassified(100) | Otu040337 | 0                     | 0 | 0 | 0.00012482836100362 | 0 |
| unclassified(100) | Otu040352 | 0.0000778513040093422 | 0 | 0 | 0                   | 0 |
| unclassified(100) | Otu040353 | 0                     | 0 | 0 | 0.00012482836100362 | 0 |
| unclassified(100) | Otu040356 | 0                     | 0 | 0 | 0.00012482836100362 | 0 |
| unclassified(100) | Otu040357 | 0.0000778513040093422 | 0 | 0 | 0                   | 0 |
| unclassified(100) | Otu040364 | 0                     | 0 | 0 | 0.00012482836100362 | 0 |
| unclassified(100) | Otu040366 | 0                     | 0 | 0 | 0.00012482836100362 | 0 |
| unclassified(100) | Otu040370 | 0                     | 0 | 0 | 0.00012482836100362 | 0 |
| unclassified(100) | Otu040376 | 0.0000778513040093422 | 0 | 0 | 0                   | 0 |
| unclassified(100) | Otu040381 | 0.0000778513040093422 | 0 | 0 | 0                   | 0 |
| unclassified(100) | Otu040386 | 0.0000778513040093422 | 0 | 0 | 0                   | 0 |
| unclassified(100) | Otu040389 | 0                     | 0 | 0 | 0.00012482836100362 | 0 |
| unclassified(100) | Otu040393 | 0                     | 0 | 0 | 0.00012482836100362 | 0 |
| unclassified(100) | Otu040394 | 0                     | 0 | 0 | 0.00012482836100362 | 0 |
| unclassified(100) | Otu040396 | 0                     | 0 | 0 | 0.00012482836100362 | 0 |
| unclassified(100) | Otu040398 | 0                     | 0 | 0 | 0.00012482836100362 | 0 |
| unclassified(100) | Otu040401 | 0.0000778513040093422 | 0 | 0 | 0                   | 0 |
| unclassified(100) | Otu040404 | 0.0000778513040093422 | 0 | 0 | 0                   | 0 |
| unclassified(100) | Otu040414 | 0.0000778513040093422 | 0 | 0 | 0                   | 0 |
| unclassified(100) | Otu040426 | 0.0000778513040093422 | 0 | 0 | 0                   | 0 |

|                   |           |                       |                      |   |                     |                      |
|-------------------|-----------|-----------------------|----------------------|---|---------------------|----------------------|
| unclassified(100) | Otu040427 | 0.0000778513040093422 | 0                    | 0 | 0                   | 0                    |
| unclassified(100) | Otu040463 | 0.0000778513040093422 | 0                    | 0 | 0                   | 0                    |
| unclassified(100) | Otu040467 | 0.0000778513040093422 | 0                    | 0 | 0                   | 0                    |
| unclassified(100) | Otu040471 | 0                     | 0                    | 0 | 0.00012482836100362 | 0                    |
| unclassified(100) | Otu040472 | 0                     | 0                    | 0 | 0.00012482836100362 | 0                    |
| unclassified(100) | Otu040474 | 0.0000778513040093422 | 0                    | 0 | 0                   | 0                    |
| unclassified(100) | Otu040477 | 0                     | 0                    | 0 | 0.00012482836100362 | 0                    |
| unclassified(100) | Otu040479 | 0                     | 0                    | 0 | 0.00012482836100362 | 0                    |
| unclassified(100) | Otu040484 | 0                     | 0                    | 0 | 0.00012482836100362 | 0                    |
| unclassified(100) | Otu040490 | 0.0000778513040093422 | 0                    | 0 | 0                   | 0                    |
| unclassified(100) | Otu040492 | 0                     | 0                    | 0 | 0                   | 0.000110387459984546 |
| unclassified(100) | Otu040498 | 0                     | 0                    | 0 | 0                   | 0.000110387459984546 |
| unclassified(100) | Otu040499 | 0                     | 0                    | 0 | 0                   | 0.000110387459984546 |
| unclassified(100) | Otu040501 | 0.0000778513040093422 | 0                    | 0 | 0                   | 0                    |
| unclassified(100) | Otu040504 | 0                     | 0                    | 0 | 0                   | 0.000110387459984546 |
| unclassified(100) | Otu040507 | 0                     | 0                    | 0 | 0.00012482836100362 | 0                    |
| unclassified(100) | Otu040515 | 0                     | 0                    | 0 | 0.00012482836100362 | 0                    |
| unclassified(100) | Otu040525 | 0                     | 0.000124968757810547 | 0 | 0                   | 0                    |
| unclassified(100) | Otu040528 | 0                     | 0                    | 0 | 0.00012482836100362 | 0                    |
| unclassified(100) | Otu040530 | 0                     | 0                    | 0 | 0.00012482836100362 | 0                    |
| unclassified(100) | Otu040534 | 0                     | 0                    | 0 | 0.00012482836100362 | 0                    |
| unclassified(100) | Otu040535 | 0                     | 0                    | 0 | 0                   | 0.000110387459984546 |
| unclassified(100) | Otu040536 | 0.0000778513040093422 | 0                    | 0 | 0                   | 0                    |
| unclassified(100) | Otu040541 | 0                     | 0                    | 0 | 0.00012482836100362 | 0                    |
| unclassified(100) | Otu040554 | 0                     | 0                    | 0 | 0.00012482836100362 | 0                    |
| unclassified(100) | Otu040845 | 0.0000778513040093422 | 0                    | 0 | 0                   | 0                    |
| unclassified(100) | Otu040850 | 0.0000778513040093422 | 0                    | 0 | 0                   | 0                    |
| unclassified(100) | Otu040852 | 0.0000778513040093422 | 0                    | 0 | 0                   | 0                    |
| unclassified(100) | Otu040857 | 0.0000778513040093422 | 0                    | 0 | 0                   | 0                    |
| Hydrotalea(100)   | Otu040858 | 0.0000778513040093422 | 0                    | 0 | 0                   | 0                    |
| unclassified(100) | Otu040880 | 0.0000778513040093422 | 0                    | 0 | 0                   | 0                    |
| unclassified(100) | Otu040884 | 0.0000778513040093422 | 0                    | 0 | 0                   | 0                    |
| Hydrotalea(100)   | Otu040885 | 0.0000778513040093422 | 0                    | 0 | 0                   | 0                    |

|                        |           |                       |                      |                      |   |                      |
|------------------------|-----------|-----------------------|----------------------|----------------------|---|----------------------|
| Hydrotalea(100)        | Otu040895 | 0.0000778513040093422 | 0                    | 0                    | 0 | 0                    |
| unclassified(100)      | Otu040900 | 0.0000778513040093422 | 0                    | 0                    | 0 | 0                    |
| Hydrotalea(100)        | Otu040903 | 0.0000778513040093422 | 0                    | 0                    | 0 | 0                    |
| Hydrotalea(100)        | Otu040908 | 0.0000778513040093422 | 0                    | 0                    | 0 | 0                    |
| Hydrotalea(100)        | Otu040913 | 0.0000778513040093422 | 0                    | 0                    | 0 | 0                    |
| Sediminibacterium(100) | Otu040920 | 0.0000778513040093422 | 0                    | 0                    | 0 | 0                    |
| Hydrotalea(100)        | Otu040938 | 0.0000778513040093422 | 0                    | 0                    | 0 | 0                    |
| unclassified(100)      | Otu040943 | 0.0000778513040093422 | 0                    | 0                    | 0 | 0                    |
| unclassified(100)      | Otu040958 | 0.0000778513040093422 | 0                    | 0                    | 0 | 0                    |
| Sediminibacterium(100) | Otu040962 | 0.0000778513040093422 | 0                    | 0                    | 0 | 0                    |
| unclassified(100)      | Otu040990 | 0.0000778513040093422 | 0                    | 0                    | 0 | 0                    |
| unclassified(100)      | Otu040991 | 0.0000778513040093422 | 0                    | 0                    | 0 | 0                    |
| Hydrotalea(100)        | Otu040996 | 0.0000778513040093422 | 0                    | 0                    | 0 | 0                    |
| Sediminibacterium(100) | Otu041031 | 0.0000778513040093422 | 0                    | 0                    | 0 | 0                    |
| unclassified(100)      | Otu041050 | 0.0000778513040093422 | 0                    | 0                    | 0 | 0                    |
| unclassified(100)      | Otu041061 | 0.0000778513040093422 | 0                    | 0                    | 0 | 0                    |
| Hydrotalea(100)        | Otu041069 | 0.0000778513040093422 | 0                    | 0                    | 0 | 0                    |
| Hydrotalea(100)        | Otu041080 | 0.0000778513040093422 | 0                    | 0                    | 0 | 0                    |
| Hydrotalea(100)        | Otu041085 | 0.0000778513040093422 | 0                    | 0                    | 0 | 0                    |
| unclassified(100)      | Otu041704 | 0                     | 0                    | 0                    | 0 | 0.000110387459984546 |
| Lacibacter(100)        | Otu041733 | 0                     | 0                    | 0.000109075043630017 | 0 | 0                    |
| Lacibacter(100)        | Otu041742 | 0                     | 0                    | 0.000109075043630017 | 0 | 0                    |
| Lacibacter(100)        | Otu041760 | 0                     | 0                    | 0                    | 0 | 0.000110387459984546 |
| unclassified(100)      | Otu041763 | 0                     | 0                    | 0                    | 0 | 0.000110387459984546 |
| Sediminibacterium(100) | Otu041987 | 0                     | 0                    | 0.000109075043630017 | 0 | 0                    |
| Lacibacter(100)        | Otu041988 | 0                     | 0                    | 0.000109075043630017 | 0 | 0                    |
| Lacibacter(100)        | Otu041991 | 0                     | 0                    | 0.000109075043630017 | 0 | 0                    |
| unclassified(100)      | Otu041995 | 0                     | 0                    | 0.000109075043630017 | 0 | 0                    |
| unclassified(100)      | Otu041996 | 0                     | 0.000124968757810547 | 0                    | 0 | 0                    |
| unclassified(100)      | Otu041999 | 0                     | 0                    | 0.000109075043630017 | 0 | 0                    |
| unclassified(100)      | Otu042132 | 0.0000778513040093422 | 0                    | 0                    | 0 | 0                    |
| Hydrotalea(100)        | Otu042144 | 0.0000778513040093422 | 0                    | 0                    | 0 | 0                    |
| Hydrotalea(100)        | Otu042179 | 0.0000778513040093422 | 0                    | 0                    | 0 | 0                    |

|                        |           |                       |                      |                      |                     |   |
|------------------------|-----------|-----------------------|----------------------|----------------------|---------------------|---|
| Hydrotalea(100)        | Otu042197 | 0.0000778513040093422 | 0                    | 0                    | 0                   | 0 |
| Hydrotalea(100)        | Otu042204 | 0.0000778513040093422 | 0                    | 0                    | 0                   | 0 |
| Hydrotalea(100)        | Otu042212 | 0.0000778513040093422 | 0                    | 0                    | 0                   | 0 |
| Hydrotalea(100)        | Otu042220 | 0.0000778513040093422 | 0                    | 0                    | 0                   | 0 |
| unclassified(100)      | Otu042226 | 0.0000778513040093422 | 0                    | 0                    | 0                   | 0 |
| unclassified(100)      | Otu042237 | 0.0000778513040093422 | 0                    | 0                    | 0                   | 0 |
| Sediminibacterium(100) | Otu042243 | 0.0000778513040093422 | 0                    | 0                    | 0                   | 0 |
| unclassified(100)      | Otu042281 | 0.0000778513040093422 | 0                    | 0                    | 0                   | 0 |
| unclassified(100)      | Otu042316 | 0.0000778513040093422 | 0                    | 0                    | 0                   | 0 |
| Lacibacter(100)        | Otu042317 | 0                     | 0                    | 0.000109075043630017 | 0                   | 0 |
| Lacibacter(100)        | Otu042321 | 0                     | 0                    | 0.000109075043630017 | 0                   | 0 |
| Hydrotalea(100)        | Otu042346 | 0.0000778513040093422 | 0                    | 0                    | 0                   | 0 |
| unclassified(100)      | Otu042347 | 0                     | 0                    | 0.000109075043630017 | 0                   | 0 |
| uncultured(100)        | Otu042352 | 0                     | 0.000124968757810547 | 0                    | 0                   | 0 |
| unclassified(100)      | Otu042359 | 0                     | 0.000124968757810547 | 0                    | 0                   | 0 |
| Lacibacter(100)        | Otu042362 | 0                     | 0                    | 0.000109075043630017 | 0                   | 0 |
| unclassified(100)      | Otu042370 | 0                     | 0                    | 0.000109075043630017 | 0                   | 0 |
| unclassified(100)      | Otu042371 | 0                     | 0                    | 0.000109075043630017 | 0                   | 0 |
| Flavisolibacter(100)   | Otu042372 | 0                     | 0                    | 0.000109075043630017 | 0                   | 0 |
| Lacibacter(100)        | Otu042374 | 0                     | 0                    | 0.000109075043630017 | 0                   | 0 |
| unclassified(100)      | Otu042377 | 0                     | 0                    | 0.000109075043630017 | 0                   | 0 |
| unclassified(100)      | Otu042385 | 0                     | 0                    | 0.000109075043630017 | 0                   | 0 |
| Lacibacter(100)        | Otu042415 | 0                     | 0                    | 0.000109075043630017 | 0                   | 0 |
| unclassified(100)      | Otu042416 | 0                     | 0                    | 0.000109075043630017 | 0                   | 0 |
| unclassified(100)      | Otu042420 | 0                     | 0                    | 0.000109075043630017 | 0                   | 0 |
| unclassified(100)      | Otu042422 | 0                     | 0                    | 0.000109075043630017 | 0                   | 0 |
| unclassified(100)      | Otu042438 | 0                     | 0                    | 0                    | 0.00012482836100362 | 0 |
| unclassified(100)      | Otu042512 | 0                     | 0.000124968757810547 | 0                    | 0                   | 0 |
| uncultured(100)        | Otu042514 | 0                     | 0.000124968757810547 | 0                    | 0                   | 0 |
| Lacibacter(100)        | Otu042527 | 0                     | 0                    | 0.000109075043630017 | 0                   | 0 |
| uncultured(100)        | Otu042549 | 0                     | 0.000124968757810547 | 0                    | 0                   | 0 |
| unclassified(100)      | Otu042554 | 0.0000778513040093422 | 0                    | 0                    | 0                   | 0 |
| Flavisolibacter(100)   | Otu042559 | 0                     | 0.000124968757810547 | 0                    | 0                   | 0 |



|                   |           |                       |                      |                      |   |   |
|-------------------|-----------|-----------------------|----------------------|----------------------|---|---|
| unclassified(100) | Otu044656 | 0.0000778513040093422 | 0                    | 0                    | 0 | 0 |
| unclassified(100) | Otu044663 | 0.000155702608018684  | 0                    | 0                    | 0 | 0 |
| unclassified(100) | Otu044670 | 0.0000778513040093422 | 0                    | 0                    | 0 | 0 |
| unclassified(100) | Otu044689 | 0.0000778513040093422 | 0                    | 0                    | 0 | 0 |
| unclassified(100) | Otu044720 | 0.0000778513040093422 | 0                    | 0                    | 0 | 0 |
| unclassified(100) | Otu044749 | 0.0000778513040093422 | 0                    | 0                    | 0 | 0 |
| unclassified(100) | Otu044762 | 0.0000778513040093422 | 0                    | 0                    | 0 | 0 |
| unclassified(100) | Otu045016 | 0                     | 0.000124968757810547 | 0                    | 0 | 0 |
| unclassified(100) | Otu045018 | 0                     | 0                    | 0.000109075043630017 | 0 | 0 |
| unclassified(100) | Otu045020 | 0                     | 0                    | 0.000109075043630017 | 0 | 0 |
| unclassified(100) | Otu045024 | 0                     | 0                    | 0.000109075043630017 | 0 | 0 |
| unclassified(100) | Otu045025 | 0                     | 0                    | 0.000109075043630017 | 0 | 0 |
| unclassified(100) | Otu045029 | 0                     | 0.000124968757810547 | 0                    | 0 | 0 |
| unclassified(100) | Otu045030 | 0                     | 0                    | 0.000109075043630017 | 0 | 0 |
| unclassified(100) | Otu045032 | 0                     | 0                    | 0.000109075043630017 | 0 | 0 |
| unclassified(100) | Otu045045 | 0                     | 0                    | 0.000109075043630017 | 0 | 0 |
| unclassified(100) | Otu045055 | 0                     | 0                    | 0.000109075043630017 | 0 | 0 |
| unclassified(100) | Otu045058 | 0                     | 0                    | 0.000109075043630017 | 0 | 0 |
| unclassified(100) | Otu045059 | 0                     | 0.000124968757810547 | 0                    | 0 | 0 |
| unclassified(100) | Otu045068 | 0.0000778513040093422 | 0                    | 0                    | 0 | 0 |
| unclassified(100) | Otu045080 | 0                     | 0                    | 0.000109075043630017 | 0 | 0 |
| unclassified(100) | Otu045081 | 0                     | 0                    | 0.000109075043630017 | 0 | 0 |
| unclassified(100) | Otu045082 | 0                     | 0                    | 0.000109075043630017 | 0 | 0 |
| unclassified(100) | Otu045087 | 0                     | 0.000124968757810547 | 0                    | 0 | 0 |
| unclassified(100) | Otu045091 | 0                     | 0                    | 0.000109075043630017 | 0 | 0 |
| unclassified(100) | Otu045092 | 0                     | 0                    | 0.000109075043630017 | 0 | 0 |
| unclassified(100) | Otu045093 | 0                     | 0                    | 0.000109075043630017 | 0 | 0 |
| unclassified(100) | Otu045097 | 0                     | 0                    | 0.000109075043630017 | 0 | 0 |
| unclassified(100) | Otu045101 | 0                     | 0                    | 0.000109075043630017 | 0 | 0 |
| unclassified(100) | Otu045105 | 0                     | 0                    | 0.000109075043630017 | 0 | 0 |
| unclassified(100) | Otu045108 | 0                     | 0                    | 0.000109075043630017 | 0 | 0 |
| unclassified(100) | Otu045111 | 0                     | 0                    | 0.000109075043630017 | 0 | 0 |
| unclassified(100) | Otu045113 | 0                     | 0                    | 0.000109075043630017 | 0 | 0 |

|                   |           |                       |                      |                      |   |                      |
|-------------------|-----------|-----------------------|----------------------|----------------------|---|----------------------|
| unclassified(100) | Otu045115 | 0                     | 0                    | 0.000109075043630017 | 0 | 0                    |
| unclassified(100) | Otu045120 | 0                     | 0                    | 0.000109075043630017 | 0 | 0                    |
| unclassified(100) | Otu045121 | 0                     | 0.000124968757810547 | 0                    | 0 | 0                    |
| unclassified(100) | Otu045128 | 0                     | 0.000124968757810547 | 0                    | 0 | 0                    |
| unclassified(100) | Otu045130 | 0                     | 0                    | 0.000109075043630017 | 0 | 0                    |
| unclassified(100) | Otu045134 | 0                     | 0.000124968757810547 | 0                    | 0 | 0                    |
| unclassified(100) | Otu045159 | 0                     | 0                    | 0.000109075043630017 | 0 | 0                    |
| unclassified(100) | Otu045160 | 0                     | 0                    | 0.000109075043630017 | 0 | 0                    |
| unclassified(100) | Otu045165 | 0                     | 0.000124968757810547 | 0                    | 0 | 0                    |
| unclassified(100) | Otu045166 | 0                     | 0                    | 0.000109075043630017 | 0 | 0                    |
| unclassified(100) | Otu045168 | 0                     | 0.000124968757810547 | 0                    | 0 | 0                    |
| unclassified(100) | Otu045172 | 0                     | 0                    | 0                    | 0 | 0.000110387459984546 |
| unclassified(100) | Otu045173 | 0                     | 0                    | 0                    | 0 | 0.000110387459984546 |
| unclassified(100) | Otu045174 | 0                     | 0                    | 0                    | 0 | 0.000110387459984546 |
| unclassified(100) | Otu045175 | 0                     | 0                    | 0                    | 0 | 0.000110387459984546 |
| unclassified(100) | Otu045176 | 0                     | 0                    | 0                    | 0 | 0.000110387459984546 |
| unclassified(100) | Otu045178 | 0                     | 0                    | 0                    | 0 | 0.000110387459984546 |
| unclassified(100) | Otu045180 | 0                     | 0                    | 0                    | 0 | 0.000110387459984546 |
| unclassified(100) | Otu045183 | 0                     | 0                    | 0                    | 0 | 0.000110387459984546 |
| unclassified(100) | Otu045187 | 0.0000778513040093422 | 0                    | 0                    | 0 | 0                    |
| unclassified(100) | Otu045208 | 0                     | 0.000124968757810547 | 0                    | 0 | 0                    |
| unclassified(100) | Otu045216 | 0                     | 0.000124968757810547 | 0                    | 0 | 0                    |
| unclassified(100) | Otu045222 | 0                     | 0.000124968757810547 | 0                    | 0 | 0                    |
| unclassified(100) | Otu045237 | 0                     | 0                    | 0.000109075043630017 | 0 | 0                    |
| unclassified(100) | Otu045238 | 0                     | 0                    | 0.000109075043630017 | 0 | 0                    |
| unclassified(100) | Otu045239 | 0                     | 0                    | 0.000109075043630017 | 0 | 0                    |
| unclassified(100) | Otu045242 | 0                     | 0                    | 0.000109075043630017 | 0 | 0                    |
| unclassified(100) | Otu045243 | 0                     | 0                    | 0.000109075043630017 | 0 | 0                    |
| unclassified(100) | Otu045244 | 0                     | 0                    | 0.000109075043630017 | 0 | 0                    |
| unclassified(100) | Otu045245 | 0                     | 0                    | 0.000109075043630017 | 0 | 0                    |
| unclassified(100) | Otu045250 | 0                     | 0                    | 0.000109075043630017 | 0 | 0                    |
| unclassified(100) | Otu045272 | 0.0000778513040093422 | 0                    | 0                    | 0 | 0                    |
| unclassified(100) | Otu045312 | 0.0000778513040093422 | 0                    | 0                    | 0 | 0                    |

|                   |           |                       |                      |                      |                     |                      |
|-------------------|-----------|-----------------------|----------------------|----------------------|---------------------|----------------------|
| unclassified(100) | Otu045314 | 0.0000778513040093422 | 0                    | 0                    | 0                   | 0                    |
| unclassified(100) | Otu045375 | 0.0000778513040093422 | 0                    | 0                    | 0                   | 0                    |
| unclassified(100) | Otu045386 | 0                     | 0.000124968757810547 | 0                    | 0                   | 0                    |
| unclassified(100) | Otu045388 | 0                     | 0.000124968757810547 | 0                    | 0                   | 0                    |
| unclassified(100) | Otu045391 | 0                     | 0                    | 0.000109075043630017 | 0                   | 0                    |
| unclassified(100) | Otu045394 | 0                     | 0.000124968757810547 | 0                    | 0                   | 0                    |
| unclassified(100) | Otu045400 | 0                     | 0                    | 0.000109075043630017 | 0                   | 0                    |
| unclassified(100) | Otu045402 | 0                     | 0                    | 0.000109075043630017 | 0                   | 0                    |
| unclassified(100) | Otu045403 | 0                     | 0                    | 0.000109075043630017 | 0                   | 0                    |
| unclassified(100) | Otu045407 | 0                     | 0                    | 0.000109075043630017 | 0                   | 0                    |
| unclassified(100) | Otu045408 | 0                     | 0                    | 0.000109075043630017 | 0                   | 0                    |
| unclassified(100) | Otu045414 | 0                     | 0                    | 0.000109075043630017 | 0                   | 0                    |
| unclassified(100) | Otu045417 | 0                     | 0                    | 0.000109075043630017 | 0                   | 0                    |
| unclassified(100) | Otu045418 | 0                     | 0                    | 0.000109075043630017 | 0                   | 0                    |
| unclassified(100) | Otu045423 | 0                     | 0                    | 0.000109075043630017 | 0                   | 0                    |
| unclassified(100) | Otu045434 | 0                     | 0                    | 0.000109075043630017 | 0                   | 0                    |
| unclassified(100) | Otu045438 | 0                     | 0                    | 0.000109075043630017 | 0                   | 0                    |
| unclassified(100) | Otu045442 | 0                     | 0                    | 0.000109075043630017 | 0                   | 0                    |
| unclassified(100) | Otu045481 | 0                     | 0                    | 0.000109075043630017 | 0                   | 0                    |
| unclassified(100) | Otu045482 | 0                     | 0.000124968757810547 | 0                    | 0                   | 0                    |
| unclassified(100) | Otu045484 | 0                     | 0                    | 0.000109075043630017 | 0                   | 0                    |
| unclassified(100) | Otu045487 | 0                     | 0                    | 0.000109075043630017 | 0                   | 0                    |
| Neochlamydia(100) | Otu046558 | 0.0000778513040093422 | 0                    | 0                    | 0                   | 0                    |
| Neochlamydia(100) | Otu046561 | 0.0000778513040093422 | 0                    | 0                    | 0                   | 0                    |
| unclassified(100) | Otu046586 | 0                     | 0                    | 0.000109075043630017 | 0                   | 0                    |
| unclassified(100) | Otu046666 | 0                     | 0                    | 0.000109075043630017 | 0                   | 0                    |
| unclassified(100) | Otu046704 | 0                     | 0                    | 0                    | 0                   | 0.000110387459984546 |
| unclassified(100) | Otu046707 | 0                     | 0                    | 0                    | 0                   | 0.000441549839938183 |
| unclassified(100) | Otu046708 | 0                     | 0                    | 0                    | 0.00012482836100362 | 0                    |
| unclassified(100) | Otu046709 | 0                     | 0                    | 0.000109075043630017 | 0                   | 0                    |
| unclassified(100) | Otu046712 | 0                     | 0.000124968757810547 | 0                    | 0                   | 0                    |
| unclassified(100) | Otu046845 | 0                     | 0                    | 0.000109075043630017 | 0                   | 0                    |
| unclassified(100) | Otu046890 | 0                     | 0                    | 0                    | 0                   | 0.000110387459984546 |

|                      |           |   |                      |                      |                     |                      |
|----------------------|-----------|---|----------------------|----------------------|---------------------|----------------------|
| Neochlamydia(100)    | Otu046895 | 0 | 0.000124968757810547 | 0                    | 0                   | 0                    |
| Hirschia(100)        | Otu046982 | 0 | 0                    | 0                    | 0.00012482836100362 | 0                    |
| unclassified(100)    | Otu047001 | 0 | 0                    | 0                    | 0                   | 0.000110387459984546 |
| uncultured(100)      | Otu047030 | 0 | 0                    | 0                    | 0.00012482836100362 | 0                    |
| Incertae_Sedis(100)  | Otu047055 | 0 | 0                    | 0                    | 0                   | 0.000110387459984546 |
| unclassified(100)    | Otu047069 | 0 | 0                    | 0.000109075043630017 | 0                   | 0                    |
| unclassified(100)    | Otu047070 | 0 | 0                    | 0                    | 0                   | 0.000110387459984546 |
| Sorangium(100)       | Otu047181 | 0 | 0                    | 0                    | 0                   | 0.000220774919969092 |
| Coprococcus(100)     | Otu047611 | 0 | 0                    | 0.000109075043630017 | 0                   | 0                    |
| Blautia(100)         | Otu047612 | 0 | 0                    | 0.000654450261780105 | 0                   | 0                    |
| unclassified(100)    | Otu047789 | 0 | 0.000124968757810547 | 0                    | 0                   | 0                    |
| unclassified(100)    | Otu047817 | 0 | 0                    | 0.000109075043630017 | 0                   | 0                    |
| unclassified(100)    | Otu047818 | 0 | 0                    | 0.000109075043630017 | 0                   | 0                    |
| unclassified(100)    | Otu047819 | 0 | 0                    | 0.000109075043630017 | 0                   | 0                    |
| unclassified(100)    | Otu047872 | 0 | 0                    | 0                    | 0.00012482836100362 | 0                    |
| unclassified(100)    | Otu047880 | 0 | 0                    | 0                    | 0.00012482836100362 | 0                    |
| unclassified(100)    | Otu047884 | 0 | 0.000124968757810547 | 0                    | 0                   | 0                    |
| unclassified(100)    | Otu047893 | 0 | 0.000124968757810547 | 0                    | 0                   | 0                    |
| Ochrobactrum(100)    | Otu047967 | 0 | 0                    | 0                    | 0                   | 0.000110387459984546 |
| Ochrobactrum(100)    | Otu047992 | 0 | 0.000124968757810547 | 0                    | 0                   | 0                    |
| unclassified(100)    | Otu048001 | 0 | 0.000124968757810547 | 0                    | 0                   | 0                    |
| unclassified(100)    | Otu048041 | 0 | 0                    | 0                    | 0                   | 0.000110387459984546 |
| Dolosigranulum(100)  | Otu048105 | 0 | 0.000124968757810547 | 0                    | 0                   | 0                    |
| Alkalibacterium(100) | Otu048167 | 0 | 0                    | 0                    | 0.00012482836100362 | 0                    |
| unclassified(100)    | Otu048383 | 0 | 0.000124968757810547 | 0                    | 0                   | 0                    |
| unclassified(100)    | Otu048387 | 0 | 0                    | 0.000109075043630017 | 0                   | 0                    |
| unclassified(100)    | Otu050908 | 0 | 0.000124968757810547 | 0                    | 0                   | 0                    |
| unclassified(100)    | Otu050910 | 0 | 0.000124968757810547 | 0                    | 0                   | 0                    |
| unclassified(100)    | Otu050925 | 0 | 0                    | 0                    | 0.00012482836100362 | 0                    |
| unclassified(100)    | Otu050927 | 0 | 0                    | 0                    | 0.00012482836100362 | 0                    |
| unclassified(100)    | Otu050931 | 0 | 0                    | 0                    | 0.00012482836100362 | 0                    |
| unclassified(100)    | Otu050935 | 0 | 0                    | 0.000109075043630017 | 0                   | 0                    |
| unclassified(100)    | Otu050946 | 0 | 0.000124968757810547 | 0                    | 0                   | 0                    |

|                   |           |                       |                      |                      |                     |                      |
|-------------------|-----------|-----------------------|----------------------|----------------------|---------------------|----------------------|
| unclassified(100) | Otu050971 | 0                     | 0                    | 0                    | 0.00012482836100362 | 0                    |
| unclassified(100) | Otu050972 | 0                     | 0                    | 0.000109075043630017 | 0                   | 0                    |
| unclassified(100) | Otu050975 | 0                     | 0                    | 0.000109075043630017 | 0                   | 0                    |
| unclassified(100) | Otu051008 | 0                     | 0.000124968757810547 | 0                    | 0                   | 0                    |
| unclassified(100) | Otu051012 | 0                     | 0                    | 0                    | 0.00012482836100362 | 0                    |
| unclassified(100) | Otu051024 | 0                     | 0.000124968757810547 | 0                    | 0                   | 0                    |
| unclassified(100) | Otu051025 | 0                     | 0.000124968757810547 | 0                    | 0                   | 0                    |
| unclassified(100) | Otu051111 | 0                     | 0.000124968757810547 | 0                    | 0                   | 0                    |
| unclassified(100) | Otu051113 | 0                     | 0.000124968757810547 | 0                    | 0                   | 0                    |
| unclassified(100) | Otu051120 | 0.0000778513040093422 | 0                    | 0                    | 0                   | 0                    |
| Leuconostoc(100)  | Otu051789 | 0                     | 0.000124968757810547 | 0                    | 0                   | 0                    |
| unclassified(100) | Otu052392 | 0                     | 0                    | 0                    | 0.00012482836100362 | 0                    |
| unclassified(100) | Otu052414 | 0                     | 0                    | 0                    | 0                   | 0.000110387459984546 |
| unclassified(100) | Otu052449 | 0.0000778513040093422 | 0                    | 0                    | 0                   | 0                    |
| unclassified(100) | Otu052505 | 0                     | 0                    | 0.000109075043630017 | 0                   | 0                    |
| unclassified(100) | Otu052506 | 0                     | 0                    | 0.000109075043630017 | 0                   | 0                    |
| unclassified(100) | Otu052507 | 0                     | 0                    | 0.000109075043630017 | 0                   | 0                    |
| unclassified(100) | Otu052509 | 0                     | 0                    | 0.000109075043630017 | 0                   | 0                    |
| unclassified(100) | Otu052510 | 0                     | 0                    | 0.000109075043630017 | 0                   | 0                    |
| unclassified(100) | Otu052516 | 0.0000778513040093422 | 0                    | 0                    | 0                   | 0                    |
| unclassified(100) | Otu052517 | 0.0000778513040093422 | 0                    | 0                    | 0                   | 0                    |
| unclassified(100) | Otu052519 | 0.0000778513040093422 | 0                    | 0                    | 0                   | 0                    |
| unclassified(100) | Otu052523 | 0.0000778513040093422 | 0                    | 0                    | 0                   | 0                    |
| unclassified(100) | Otu052538 | 0.0000778513040093422 | 0                    | 0                    | 0                   | 0                    |
| unclassified(100) | Otu052543 | 0.0000778513040093422 | 0                    | 0                    | 0                   | 0                    |
| unclassified(100) | Otu052546 | 0.0000778513040093422 | 0                    | 0                    | 0                   | 0                    |
| unclassified(100) | Otu052554 | 0                     | 0.000124968757810547 | 0                    | 0                   | 0                    |
| unclassified(100) | Otu052557 | 0                     | 0.000124968757810547 | 0                    | 0                   | 0                    |
| unclassified(100) | Otu052561 | 0                     | 0.000124968757810547 | 0                    | 0                   | 0                    |
| unclassified(100) | Otu052566 | 0                     | 0                    | 0                    | 0.00012482836100362 | 0                    |
| unclassified(100) | Otu052569 | 0                     | 0                    | 0                    | 0.00012482836100362 | 0                    |
| unclassified(100) | Otu052598 | 0.0000778513040093422 | 0                    | 0                    | 0                   | 0                    |
| unclassified(100) | Otu052602 | 0.0000778513040093422 | 0                    | 0                    | 0                   | 0                    |

|                   |           |                       |                      |                      |                     |                      |
|-------------------|-----------|-----------------------|----------------------|----------------------|---------------------|----------------------|
| unclassified(100) | Otu052603 | 0.0000778513040093422 | 0                    | 0                    | 0                   | 0                    |
| unclassified(100) | Otu052604 | 0.0000778513040093422 | 0                    | 0                    | 0                   | 0                    |
| unclassified(100) | Otu052606 | 0                     | 0.000124968757810547 | 0                    | 0                   | 0                    |
| unclassified(100) | Otu053155 | 0.0000778513040093422 | 0                    | 0                    | 0                   | 0                    |
| unclassified(100) | Otu053159 | 0.0000778513040093422 | 0                    | 0                    | 0                   | 0                    |
| unclassified(100) | Otu053161 | 0.0000778513040093422 | 0                    | 0                    | 0                   | 0                    |
| unclassified(100) | Otu053162 | 0.0000778513040093422 | 0                    | 0                    | 0                   | 0                    |
| unclassified(100) | Otu053169 | 0.0000778513040093422 | 0                    | 0                    | 0                   | 0                    |
| unclassified(100) | Otu053181 | 0.0000778513040093422 | 0                    | 0                    | 0                   | 0                    |
| unclassified(100) | Otu053182 | 0.0000778513040093422 | 0                    | 0                    | 0                   | 0                    |
| unclassified(100) | Otu053191 | 0.0000778513040093422 | 0                    | 0                    | 0                   | 0                    |
| unclassified(100) | Otu053192 | 0.0000778513040093422 | 0                    | 0                    | 0                   | 0                    |
| unclassified(100) | Otu053197 | 0.0000778513040093422 | 0                    | 0                    | 0                   | 0                    |
| unclassified(100) | Otu053198 | 0.0000778513040093422 | 0                    | 0                    | 0                   | 0                    |
| unclassified(100) | Otu053199 | 0.0000778513040093422 | 0                    | 0                    | 0                   | 0                    |
| unclassified(100) | Otu053238 | 0.0000778513040093422 | 0                    | 0                    | 0                   | 0                    |
| unclassified(100) | Otu053744 | 0                     | 0                    | 0                    | 0                   | 0.000110387459984546 |
| unclassified(100) | Otu053745 | 0                     | 0                    | 0                    | 0                   | 0.000110387459984546 |
| unclassified(100) | Otu053767 | 0                     | 0                    | 0                    | 0                   | 0.000110387459984546 |
| unclassified(100) | Otu053771 | 0                     | 0                    | 0                    | 0                   | 0.000110387459984546 |
| unclassified(100) | Otu053772 | 0                     | 0                    | 0                    | 0                   | 0.000110387459984546 |
| unclassified(100) | Otu053774 | 0                     | 0                    | 0                    | 0                   | 0.000110387459984546 |
| unclassified(100) | Otu053779 | 0                     | 0                    | 0                    | 0                   | 0.000110387459984546 |
| unclassified(100) | Otu053781 | 0                     | 0                    | 0                    | 0                   | 0.000110387459984546 |
| unclassified(100) | Otu053823 | 0                     | 0                    | 0                    | 0.00012482836100362 | 0                    |
| unclassified(100) | Otu053824 | 0                     | 0                    | 0                    | 0.00012482836100362 | 0                    |
| unclassified(100) | Otu054166 | 0                     | 0.000124968757810547 | 0                    | 0                   | 0                    |
| unclassified(100) | Otu054170 | 0                     | 0                    | 0.000109075043630017 | 0                   | 0.000110387459984546 |
| unclassified(100) | Otu054173 | 0.0000778513040093422 | 0                    | 0                    | 0                   | 0                    |
| unclassified(100) | Otu054199 | 0                     | 0                    | 0.000109075043630017 | 0                   | 0                    |
| unclassified(100) | Otu054201 | 0                     | 0.000124968757810547 | 0                    | 0                   | 0                    |
| unclassified(100) | Otu054204 | 0                     | 0                    | 0.000109075043630017 | 0                   | 0                    |
| unclassified(100) | Otu054207 | 0                     | 0                    | 0.000218150087260035 | 0                   | 0                    |

|                    |           |                       |   |   |   |   |
|--------------------|-----------|-----------------------|---|---|---|---|
| unclassified(100)  | Otu059291 | 0.0000778513040093422 | 0 | 0 | 0 | 0 |
| Aquabacterium(100) | Otu059295 | 0.0000778513040093422 | 0 | 0 | 0 | 0 |
| Pelomonas(100)     | Otu059449 | 0.0000778513040093422 | 0 | 0 | 0 | 0 |
| unclassified(100)  | Otu059452 | 0.0000778513040093422 | 0 | 0 | 0 | 0 |
| unclassified(100)  | Otu059458 | 0.0000778513040093422 | 0 | 0 | 0 | 0 |
| unclassified(100)  | Otu059462 | 0.0000778513040093422 | 0 | 0 | 0 | 0 |
| unclassified(100)  | Otu059503 | 0.0000778513040093422 | 0 | 0 | 0 | 0 |
| Aquabacterium(100) | Otu059517 | 0.0000778513040093422 | 0 | 0 | 0 | 0 |
| unclassified(100)  | Otu059519 | 0.0000778513040093422 | 0 | 0 | 0 | 0 |
| unclassified(100)  | Otu059557 | 0.0000778513040093422 | 0 | 0 | 0 | 0 |
| unclassified(100)  | Otu059576 | 0.0000778513040093422 | 0 | 0 | 0 | 0 |
| unclassified(100)  | Otu059591 | 0.0000778513040093422 | 0 | 0 | 0 | 0 |
| unclassified(100)  | Otu059604 | 0.0000778513040093422 | 0 | 0 | 0 | 0 |
| unclassified(100)  | Otu059619 | 0.0000778513040093422 | 0 | 0 | 0 | 0 |
| unclassified(100)  | Otu059676 | 0.0000778513040093422 | 0 | 0 | 0 | 0 |
| unclassified(100)  | Otu059692 | 0.0000778513040093422 | 0 | 0 | 0 | 0 |
| Aquabacterium(100) | Otu059703 | 0.0000778513040093422 | 0 | 0 | 0 | 0 |
| unclassified(100)  | Otu059711 | 0.0000778513040093422 | 0 | 0 | 0 | 0 |
| unclassified(100)  | Otu059712 | 0.0000778513040093422 | 0 | 0 | 0 | 0 |
| Aquabacterium(100) | Otu059718 | 0.0000778513040093422 | 0 | 0 | 0 | 0 |
| unclassified(100)  | Otu059720 | 0.0000778513040093422 | 0 | 0 | 0 | 0 |
| unclassified(100)  | Otu064517 | 0.0000778513040093422 | 0 | 0 | 0 | 0 |
| unclassified(100)  | Otu065143 | 0.0000778513040093422 | 0 | 0 | 0 | 0 |
| unclassified(100)  | Otu065147 | 0.0000778513040093422 | 0 | 0 | 0 | 0 |
| unclassified(100)  | Otu065153 | 0.0000778513040093422 | 0 | 0 | 0 | 0 |
| unclassified(100)  | Otu065155 | 0.0000778513040093422 | 0 | 0 | 0 | 0 |
| unclassified(100)  | Otu065172 | 0.0000778513040093422 | 0 | 0 | 0 | 0 |
| unclassified(100)  | Otu065253 | 0.0000778513040093422 | 0 | 0 | 0 | 0 |
| unclassified(100)  | Otu065255 | 0.0000778513040093422 | 0 | 0 | 0 | 0 |
| unclassified(100)  | Otu065404 | 0.0000778513040093422 | 0 | 0 | 0 | 0 |
| unclassified(100)  | Otu065411 | 0.0000778513040093422 | 0 | 0 | 0 | 0 |
| unclassified(100)  | Otu065419 | 0.0000778513040093422 | 0 | 0 | 0 | 0 |
| unclassified(100)  | Otu065429 | 0.0000778513040093422 | 0 | 0 | 0 | 0 |

|                   |           |                       |                      |                      |                     |                      |
|-------------------|-----------|-----------------------|----------------------|----------------------|---------------------|----------------------|
| unclassified(100) | Otu065446 | 0.0000778513040093422 | 0                    | 0                    | 0                   | 0                    |
| unclassified(100) | Otu065449 | 0.0000778513040093422 | 0                    | 0                    | 0                   | 0                    |
| unclassified(100) | Otu065521 | 0.0000778513040093422 | 0                    | 0                    | 0                   | 0                    |
| unclassified(100) | Otu065523 | 0.0000778513040093422 | 0                    | 0                    | 0                   | 0                    |
| unclassified(100) | Otu065585 | 0.0000778513040093422 | 0                    | 0                    | 0                   | 0                    |
| unclassified(100) | Otu065621 | 0.0000778513040093422 | 0                    | 0                    | 0                   | 0                    |
| unclassified(100) | Otu065622 | 0.0000778513040093422 | 0                    | 0                    | 0                   | 0                    |
| unclassified(100) | Otu065623 | 0.0000778513040093422 | 0                    | 0                    | 0                   | 0                    |
| Pseudomonas(100)  | Otu070303 | 0                     | 0                    | 0.000109075043630017 | 0                   | 0                    |
| Pseudomonas(100)  | Otu070311 | 0                     | 0                    | 0.000109075043630017 | 0                   | 0                    |
| Cellvibrio(100)   | Otu070320 | 0                     | 0                    | 0                    | 0.00012482836100362 | 0                    |
| Pseudomonas(100)  | Otu070325 | 0                     | 0                    | 0                    | 0.00012482836100362 | 0                    |
| Pseudomonas(100)  | Otu070341 | 0                     | 0                    | 0.000109075043630017 | 0                   | 0                    |
| Pseudomonas(100)  | Otu070346 | 0                     | 0                    | 0.000109075043630017 | 0                   | 0                    |
| Pseudomonas(100)  | Otu070368 | 0                     | 0                    | 0                    | 0.00012482836100362 | 0                    |
| Pseudomonas(100)  | Otu070380 | 0                     | 0                    | 0                    | 0.00012482836100362 | 0                    |
| Pseudomonas(100)  | Otu070386 | 0                     | 0                    | 0                    | 0.00012482836100362 | 0                    |
| Pseudomonas(100)  | Otu070392 | 0                     | 0                    | 0                    | 0.00012482836100362 | 0                    |
| Pseudomonas(100)  | Otu070403 | 0                     | 0                    | 0                    | 0.00012482836100362 | 0                    |
| unclassified(100) | Otu070410 | 0                     | 0                    | 0                    | 0.00012482836100362 | 0                    |
| Pseudomonas(100)  | Otu070412 | 0                     | 0                    | 0                    | 0.00012482836100362 | 0                    |
| Pseudomonas(100)  | Otu071083 | 0                     | 0.000124968757810547 | 0                    | 0                   | 0                    |
| Pseudomonas(100)  | Otu071112 | 0                     | 0                    | 0                    | 0                   | 0.000110387459984546 |
| Pseudomonas(100)  | Otu071113 | 0                     | 0                    | 0                    | 0                   | 0.000110387459984546 |
| Pseudomonas(100)  | Otu071139 | 0                     | 0                    | 0                    | 0.00012482836100362 | 0                    |
| Pseudomonas(100)  | Otu071145 | 0                     | 0                    | 0                    | 0.00012482836100362 | 0                    |
| Pseudomonas(100)  | Otu071189 | 0                     | 0                    | 0.000109075043630017 | 0                   | 0                    |
| unclassified(100) | Otu071201 | 0                     | 0.000124968757810547 | 0                    | 0                   | 0                    |
| Pseudomonas(100)  | Otu071210 | 0                     | 0.000124968757810547 | 0                    | 0                   | 0                    |
| Pseudomonas(100)  | Otu071215 | 0                     | 0.000124968757810547 | 0                    | 0                   | 0                    |
| Pseudomonas(100)  | Otu071284 | 0                     | 0.000124968757810547 | 0                    | 0                   | 0                    |
| Pseudomonas(100)  | Otu071316 | 0                     | 0.000124968757810547 | 0                    | 0                   | 0                    |
| Pseudomonas(100)  | Otu071324 | 0                     | 0.000124968757810547 | 0                    | 0                   | 0                    |



|                   |           |   |                      |                      |                     |                      |
|-------------------|-----------|---|----------------------|----------------------|---------------------|----------------------|
| Pseudomonas(100)  | Otu071326 | 0 | 0.000124968757810547 | 0                    | 0                   | 0                    |
| Pseudomonas(100)  | Otu071328 | 0 | 0.000124968757810547 | 0                    | 0                   | 0                    |
| Pseudomonas(100)  | Otu071330 | 0 | 0.000124968757810547 | 0                    | 0                   | 0                    |
| Pseudomonas(100)  | Otu071333 | 0 | 0.000124968757810547 | 0                    | 0                   | 0                    |
| Pseudomonas(100)  | Otu071345 | 0 | 0.000124968757810547 | 0                    | 0                   | 0                    |
| Pseudomonas(100)  | Otu071347 | 0 | 0.000124968757810547 | 0                    | 0                   | 0                    |
| Pseudomonas(100)  | Otu071352 | 0 | 0.000124968757810547 | 0                    | 0                   | 0                    |
| Pseudomonas(100)  | Otu071367 | 0 | 0.000124968757810547 | 0                    | 0                   | 0                    |
| unclassified(100) | Otu071373 | 0 | 0.000124968757810547 | 0                    | 0                   | 0                    |
| Pseudomonas(100)  | Otu071389 | 0 | 0                    | 0                    | 0.00012482836100362 | 0                    |
| Pseudomonas(100)  | Otu071417 | 0 | 0                    | 0                    | 0                   | 0.000110387459984546 |
| Pseudomonas(100)  | Otu071420 | 0 | 0                    | 0                    | 0                   | 0.000110387459984546 |
| Pseudomonas(100)  | Otu071430 | 0 | 0                    | 0                    | 0                   | 0.000110387459984546 |
| Pseudomonas(100)  | Otu071435 | 0 | 0                    | 0                    | 0.00012482836100362 | 0                    |
| Pseudomonas(100)  | Otu071448 | 0 | 0                    | 0                    | 0                   | 0.000110387459984546 |
| Pseudomonas(100)  | Otu071491 | 0 | 0.000124968757810547 | 0                    | 0                   | 0                    |
| Pseudomonas(100)  | Otu071496 | 0 | 0                    | 0                    | 0                   | 0.000110387459984546 |
| uncultured(100)   | Otu071497 | 0 | 0                    | 0                    | 0                   | 0.000110387459984546 |
| unclassified(100) | Otu071502 | 0 | 0                    | 0                    | 0                   | 0.000110387459984546 |
| Pseudomonas(100)  | Otu071503 | 0 | 0                    | 0                    | 0                   | 0.000110387459984546 |
| Pseudomonas(100)  | Otu071505 | 0 | 0                    | 0                    | 0                   | 0.000110387459984546 |
| unclassified(100) | Otu071517 | 0 | 0                    | 0                    | 0                   | 0.000110387459984546 |
| Pseudomonas(100)  | Otu071582 | 0 | 0.000124968757810547 | 0                    | 0                   | 0                    |
| Pseudomonas(100)  | Otu071653 | 0 | 0                    | 0                    | 0.00012482836100362 | 0                    |
| Pseudomonas(100)  | Otu071660 | 0 | 0                    | 0                    | 0.00012482836100362 | 0                    |
| Pseudomonas(100)  | Otu071685 | 0 | 0                    | 0                    | 0.00012482836100362 | 0                    |
| uncultured(100)   | Otu071697 | 0 | 0                    | 0.000109075043630017 | 0                   | 0                    |
| Pseudomonas(100)  | Otu071700 | 0 | 0                    | 0.000109075043630017 | 0                   | 0                    |
| Pseudomonas(100)  | Otu071701 | 0 | 0                    | 0.000109075043630017 | 0                   | 0                    |
| Pseudomonas(100)  | Otu071702 | 0 | 0                    | 0.000109075043630017 | 0                   | 0                    |
| Pseudomonas(100)  | Otu071800 | 0 | 0.000124968757810547 | 0                    | 0                   | 0                    |
| Pseudomonas(100)  | Otu071802 | 0 | 0.000124968757810547 | 0                    | 0                   | 0                    |
| Pseudomonas(100)  | Otu071815 | 0 | 0                    | 0.000109075043630017 | 0                   | 0                    |

|                   |           |                       |                      |                      |                     |                      |
|-------------------|-----------|-----------------------|----------------------|----------------------|---------------------|----------------------|
| Pseudomonas(100)  | Otu071817 | 0                     | 0.000124968757810547 | 0                    | 0                   | 0                    |
| Pseudomonas(100)  | Otu071837 | 0                     | 0.000124968757810547 | 0                    | 0                   | 0                    |
| Pseudomonas(100)  | Otu071853 | 0                     | 0                    | 0.000109075043630017 | 0                   | 0                    |
| Pseudomonas(100)  | Otu071857 | 0                     | 0                    | 0.000109075043630017 | 0                   | 0                    |
| Pseudomonas(100)  | Otu071863 | 0                     | 0.000124968757810547 | 0                    | 0                   | 0                    |
| Pseudomonas(100)  | Otu071882 | 0                     | 0.000124968757810547 | 0                    | 0                   | 0                    |
| Pseudomonas(100)  | Otu071978 | 0                     | 0.000124968757810547 | 0                    | 0                   | 0                    |
| Pseudomonas(100)  | Otu076133 | 0                     | 0                    | 0                    | 0                   | 0.000110387459984546 |
| uncultured(100)   | Otu076217 | 0.0000778513040093422 | 0                    | 0                    | 0                   | 0                    |
| uncultured(100)   | Otu076219 | 0.0000778513040093422 | 0                    | 0                    | 0                   | 0                    |
| uncultured(100)   | Otu076236 | 0.0000778513040093422 | 0                    | 0                    | 0                   | 0                    |
| uncultured(100)   | Otu077778 | 0.0000778513040093422 | 0                    | 0                    | 0                   | 0                    |
| unclassified(100) | Otu079862 | 0                     | 0                    | 0                    | 0                   | 0.000110387459984546 |
| unclassified(100) | Otu079878 | 0                     | 0                    | 0                    | 0                   | 0.000110387459984546 |
| unclassified(100) | Otu079879 | 0                     | 0                    | 0                    | 0                   | 0.000110387459984546 |
| unclassified(100) | Otu079892 | 0                     | 0                    | 0                    | 0.00012482836100362 | 0                    |
| unclassified(100) | Otu079960 | 0                     | 0                    | 0                    | 0                   | 0.000110387459984546 |
| unclassified(100) | Otu080010 | 0                     | 0                    | 0                    | 0                   | 0.000110387459984546 |
| unclassified(100) | Otu080035 | 0                     | 0                    | 0                    | 0.00012482836100362 | 0                    |
| unclassified(100) | Otu080092 | 0                     | 0.000124968757810547 | 0                    | 0                   | 0                    |
| unclassified(100) | Otu080096 | 0                     | 0.000124968757810547 | 0                    | 0                   | 0                    |
| unclassified(100) | Otu080099 | 0                     | 0.000124968757810547 | 0                    | 0                   | 0                    |
| unclassified(100) | Otu080134 | 0                     | 0                    | 0                    | 0.00012482836100362 | 0                    |
| unclassified(100) | Otu080136 | 0                     | 0                    | 0                    | 0.00012482836100362 | 0                    |
| unclassified(100) | Otu080209 | 0                     | 0                    | 0                    | 0.00012482836100362 | 0                    |
| unclassified(100) | Otu080218 | 0                     | 0                    | 0                    | 0                   | 0.000993487139860912 |
| unclassified(100) | Otu080415 | 0.0000778513040093422 | 0                    | 0                    | 0                   | 0                    |
| unclassified(100) | Otu080511 | 0                     | 0.000124968757810547 | 0                    | 0                   | 0                    |
| unclassified(100) | Otu080616 | 0                     | 0                    | 0                    | 0.00012482836100362 | 0                    |
| unclassified(100) | Otu080639 | 0                     | 0                    | 0                    | 0.00012482836100362 | 0                    |
| unclassified(100) | Otu080643 | 0                     | 0                    | 0                    | 0.00012482836100362 | 0                    |
| unclassified(100) | Otu080646 | 0                     | 0                    | 0                    | 0.00012482836100362 | 0                    |
| unclassified(100) | Otu080665 | 0                     | 0                    | 0                    | 0                   | 0.000110387459984546 |

|                   |           |                       |                      |                      |                     |                      |
|-------------------|-----------|-----------------------|----------------------|----------------------|---------------------|----------------------|
| unclassified(100) | Otu080666 | 0                     | 0                    | 0                    | 0                   | 0.000110387459984546 |
| unclassified(100) | Otu080672 | 0                     | 0                    | 0                    | 0                   | 0.000110387459984546 |
| unclassified(100) | Otu080682 | 0                     | 0                    | 0                    | 0.00012482836100362 | 0                    |
| unclassified(100) | Otu080684 | 0                     | 0                    | 0                    | 0.00012482836100362 | 0                    |
| unclassified(100) | Otu080686 | 0                     | 0                    | 0                    | 0.00012482836100362 | 0                    |
| unclassified(100) | Otu080692 | 0                     | 0                    | 0                    | 0                   | 0.000110387459984546 |
| unclassified(100) | Otu080693 | 0                     | 0                    | 0                    | 0                   | 0.000110387459984546 |
| unclassified(100) | Otu080694 | 0                     | 0                    | 0                    | 0                   | 0.000110387459984546 |
| unclassified(100) | Otu080703 | 0                     | 0                    | 0                    | 0                   | 0.000110387459984546 |
| unclassified(100) | Otu080707 | 0                     | 0                    | 0                    | 0                   | 0.000110387459984546 |
| unclassified(100) | Otu080708 | 0                     | 0                    | 0                    | 0                   | 0.000110387459984546 |
| unclassified(100) | Otu080717 | 0                     | 0                    | 0                    | 0                   | 0.000110387459984546 |
| unclassified(100) | Otu080720 | 0                     | 0                    | 0                    | 0                   | 0.000110387459984546 |
| unclassified(100) | Otu080760 | 0.0000778513040093422 | 0                    | 0                    | 0                   | 0                    |
| unclassified(100) | Otu080763 | 0.0000778513040093422 | 0                    | 0                    | 0                   | 0                    |
| unclassified(100) | Otu080764 | 0.0000778513040093422 | 0                    | 0                    | 0                   | 0                    |
| unclassified(100) | Otu080792 | 0                     | 0                    | 0                    | 0.00012482836100362 | 0                    |
| unclassified(100) | Otu080803 | 0                     | 0                    | 0                    | 0.00012482836100362 | 0                    |
| unclassified(100) | Otu080806 | 0                     | 0                    | 0                    | 0.00012482836100362 | 0                    |
| unclassified(100) | Otu084290 | 0                     | 0.000124968757810547 | 0                    | 0                   | 0                    |
| unclassified(100) | Otu084339 | 0                     | 0.000124968757810547 | 0                    | 0                   | 0                    |
| unclassified(100) | Otu084360 | 0                     | 0.000124968757810547 | 0                    | 0                   | 0                    |
| unclassified(100) | Otu084365 | 0                     | 0.000124968757810547 | 0                    | 0                   | 0                    |
| unclassified(100) | Otu084381 | 0                     | 0.000124968757810547 | 0                    | 0                   | 0                    |
| unclassified(100) | Otu084391 | 0                     | 0.000124968757810547 | 0                    | 0                   | 0                    |
| unclassified(100) | Otu084530 | 0                     | 0                    | 0                    | 0.00012482836100362 | 0                    |
| unclassified(100) | Otu084533 | 0                     | 0                    | 0                    | 0.00012482836100362 | 0                    |
| unclassified(100) | Otu084535 | 0                     | 0                    | 0                    | 0.00012482836100362 | 0                    |
| unclassified(100) | Otu084541 | 0                     | 0                    | 0                    | 0.00012482836100362 | 0                    |
| unclassified(100) | Otu084547 | 0                     | 0                    | 0                    | 0.00012482836100362 | 0                    |
| unclassified(100) | Otu084548 | 0                     | 0                    | 0                    | 0.00012482836100362 | 0                    |
| unclassified(100) | Otu084559 | 0                     | 0                    | 0.000109075043630017 | 0                   | 0                    |
| unclassified(100) | Otu084562 | 0                     | 0                    | 0.000109075043630017 | 0                   | 0                    |

|                       |           |                       |                      |                      |                     |   |
|-----------------------|-----------|-----------------------|----------------------|----------------------|---------------------|---|
| unclassified(100)     | Otu084563 | 0                     | 0                    | 0.000109075043630017 | 0                   | 0 |
| unclassified(100)     | Otu084564 | 0                     | 0                    | 0.000109075043630017 | 0                   | 0 |
| unclassified(100)     | Otu084566 | 0                     | 0                    | 0.000109075043630017 | 0                   | 0 |
| unclassified(100)     | Otu084572 | 0                     | 0                    | 0.000109075043630017 | 0                   | 0 |
| unclassified(100)     | Otu084573 | 0                     | 0                    | 0.000109075043630017 | 0                   | 0 |
| unclassified(100)     | Otu084575 | 0                     | 0                    | 0                    | 0.00012482836100362 | 0 |
| unclassified(100)     | Otu084582 | 0                     | 0                    | 0.000109075043630017 | 0                   | 0 |
| unclassified(100)     | Otu084585 | 0                     | 0                    | 0                    | 0.00012482836100362 | 0 |
| unclassified(100)     | Otu084596 | 0                     | 0                    | 0                    | 0.00012482836100362 | 0 |
| unclassified(100)     | Otu084612 | 0                     | 0                    | 0                    | 0.00012482836100362 | 0 |
| unclassified(100)     | Otu084615 | 0                     | 0                    | 0                    | 0.00012482836100362 | 0 |
| unclassified(100)     | Otu084618 | 0                     | 0                    | 0                    | 0.00012482836100362 | 0 |
| unclassified(100)     | Otu084630 | 0                     | 0                    | 0.000109075043630017 | 0                   | 0 |
| unclassified(100)     | Otu084632 | 0                     | 0                    | 0                    | 0.00012482836100362 | 0 |
| unclassified(100)     | Otu084636 | 0                     | 0                    | 0                    | 0.00012482836100362 | 0 |
| unclassified(100)     | Otu084639 | 0                     | 0                    | 0                    | 0.00012482836100362 | 0 |
| unclassified(100)     | Otu084647 | 0                     | 0.000124968757810547 | 0                    | 0                   | 0 |
| unclassified(100)     | Otu084675 | 0                     | 0.000124968757810547 | 0                    | 0                   | 0 |
| unclassified(100)     | Otu084681 | 0                     | 0.000124968757810547 | 0                    | 0                   | 0 |
| unclassified(100)     | Otu084684 | 0                     | 0.000124968757810547 | 0                    | 0                   | 0 |
| unclassified(100)     | Otu084699 | 0                     | 0.000124968757810547 | 0                    | 0                   | 0 |
| unclassified(100)     | Otu084704 | 0                     | 0.000124968757810547 | 0                    | 0                   | 0 |
| unclassified(100)     | Otu084713 | 0                     | 0                    | 0.000109075043630017 | 0                   | 0 |
| unclassified(100)     | Otu084758 | 0                     | 0                    | 0.000109075043630017 | 0                   | 0 |
| unclassified(100)     | Otu084766 | 0                     | 0                    | 0.000109075043630017 | 0                   | 0 |
| Methylobacterium(100) | Otu086055 | 0.0000778513040093422 | 0                    | 0                    | 0                   | 0 |
| Methylobacterium(100) | Otu086117 | 0.0000778513040093422 | 0                    | 0                    | 0                   | 0 |
| Methylobacterium(100) | Otu086126 | 0.0000778513040093422 | 0                    | 0                    | 0                   | 0 |
| Methylobacterium(100) | Otu086128 | 0.0000778513040093422 | 0                    | 0                    | 0                   | 0 |
| Methylobacterium(100) | Otu086182 | 0.0000778513040093422 | 0                    | 0                    | 0                   | 0 |
| Methylobacterium(100) | Otu086212 | 0.0000778513040093422 | 0                    | 0                    | 0                   | 0 |
| Methylobacterium(100) | Otu086220 | 0.0000778513040093422 | 0                    | 0                    | 0                   | 0 |
| Methylobacterium(100) | Otu086856 | 0                     | 0                    | 0                    | 0.00012482836100362 | 0 |

|                       |           |                       |                      |                      |                     |                      |
|-----------------------|-----------|-----------------------|----------------------|----------------------|---------------------|----------------------|
| Methylobacterium(100) | Otu086881 | 0                     | 0                    | 0                    | 0                   | 0.000110387459984546 |
| Methylobacterium(100) | Otu086885 | 0                     | 0                    | 0                    | 0                   | 0.000110387459984546 |
| Methylobacterium(100) | Otu086889 | 0                     | 0.000124968757810547 | 0                    | 0                   | 0                    |
| Methylobacterium(100) | Otu086907 | 0.0000778513040093422 | 0                    | 0                    | 0                   | 0                    |
| Methylobacterium(100) | Otu086912 | 0                     | 0                    | 0                    | 0.00012482836100362 | 0                    |
| Methylobacterium(100) | Otu086923 | 0                     | 0                    | 0                    | 0                   | 0.000110387459984546 |
| Methylobacterium(100) | Otu086926 | 0                     | 0                    | 0                    | 0                   | 0.000110387459984546 |
| Methylobacterium(100) | Otu086991 | 0                     | 0                    | 0.000109075043630017 | 0                   | 0                    |
| Methylobacterium(100) | Otu087015 | 0                     | 0                    | 0.000109075043630017 | 0                   | 0                    |
| Methylobacterium(100) | Otu087020 | 0                     | 0                    | 0.000109075043630017 | 0                   | 0                    |
| Methylobacterium(100) | Otu087023 | 0                     | 0                    | 0.000109075043630017 | 0                   | 0                    |
| Methylobacterium(100) | Otu087026 | 0                     | 0                    | 0.000109075043630017 | 0                   | 0                    |
| Methylobacterium(100) | Otu087027 | 0                     | 0                    | 0.000109075043630017 | 0                   | 0                    |
| Methylobacterium(100) | Otu087028 | 0                     | 0                    | 0.000109075043630017 | 0                   | 0                    |
| Methylobacterium(100) | Otu087031 | 0                     | 0                    | 0.000109075043630017 | 0                   | 0                    |
| Methylobacterium(100) | Otu087033 | 0                     | 0                    | 0.000218150087260035 | 0                   | 0                    |
| Methylobacterium(100) | Otu087205 | 0                     | 0                    | 0                    | 0                   | 0.000110387459984546 |
| Methylobacterium(100) | Otu087220 | 0.0000778513040093422 | 0                    | 0                    | 0                   | 0                    |
| Methylobacterium(100) | Otu087231 | 0.0000778513040093422 | 0                    | 0                    | 0                   | 0                    |
| Methylobacterium(100) | Otu087232 | 0.0000778513040093422 | 0                    | 0                    | 0                   | 0                    |
| Methylobacterium(100) | Otu087235 | 0.0000778513040093422 | 0                    | 0                    | 0                   | 0                    |
| Methylobacterium(100) | Otu087236 | 0.0000778513040093422 | 0                    | 0                    | 0                   | 0                    |
| Methylobacterium(100) | Otu087241 | 0.0000778513040093422 | 0                    | 0                    | 0                   | 0                    |
| Methylobacterium(100) | Otu087291 | 0.0000778513040093422 | 0                    | 0                    | 0                   | 0                    |
| Methylobacterium(100) | Otu087317 | 0.0000778513040093422 | 0                    | 0                    | 0                   | 0                    |
| Methylobacterium(100) | Otu087336 | 0.0000778513040093422 | 0                    | 0                    | 0                   | 0                    |
| Methylobacterium(100) | Otu087355 | 0.0000778513040093422 | 0                    | 0                    | 0                   | 0                    |
| Methylobacterium(100) | Otu087397 | 0.0000778513040093422 | 0                    | 0                    | 0                   | 0                    |
| Methylobacterium(100) | Otu087404 | 0.0000778513040093422 | 0                    | 0                    | 0                   | 0                    |
| Methylobacterium(100) | Otu087416 | 0.0000778513040093422 | 0                    | 0                    | 0                   | 0                    |
| Methylobacterium(100) | Otu087425 | 0.0000778513040093422 | 0                    | 0                    | 0                   | 0                    |
| Methylobacterium(100) | Otu087464 | 0.0000778513040093422 | 0                    | 0                    | 0                   | 0                    |
| Methylobacterium(100) | Otu087469 | 0                     | 0                    | 0.000109075043630017 | 0                   | 0                    |

|                       |           |                       |                      |                      |                     |                      |
|-----------------------|-----------|-----------------------|----------------------|----------------------|---------------------|----------------------|
| Methylobacterium(100) | Otu087474 | 0.0000778513040093422 | 0                    | 0                    | 0                   | 0                    |
| Methylobacterium(100) | Otu087476 | 0.0000778513040093422 | 0                    | 0                    | 0                   | 0                    |
| Methylobacterium(100) | Otu087478 | 0.0000778513040093422 | 0                    | 0                    | 0                   | 0                    |
| Methylobacterium(100) | Otu087483 | 0.0000778513040093422 | 0                    | 0                    | 0                   | 0                    |
| Methylobacterium(100) | Otu087484 | 0.0000778513040093422 | 0                    | 0                    | 0                   | 0                    |
| Methylobacterium(100) | Otu087488 | 0.0000778513040093422 | 0                    | 0                    | 0                   | 0                    |
| Methylobacterium(100) | Otu087497 | 0.0000778513040093422 | 0                    | 0                    | 0                   | 0                    |
| Methylobacterium(100) | Otu087517 | 0                     | 0.000124968757810547 | 0                    | 0                   | 0                    |
| Methylobacterium(100) | Otu087522 | 0                     | 0.000124968757810547 | 0                    | 0                   | 0                    |
| Methylobacterium(100) | Otu087528 | 0                     | 0                    | 0                    | 0                   | 0.000110387459984546 |
| Methylobacterium(100) | Otu087529 | 0                     | 0                    | 0                    | 0                   | 0.000110387459984546 |
| Methylobacterium(100) | Otu087532 | 0                     | 0                    | 0                    | 0                   | 0.000110387459984546 |
| Methylobacterium(100) | Otu087534 | 0                     | 0                    | 0                    | 0                   | 0.000110387459984546 |
| Methylobacterium(100) | Otu087536 | 0                     | 0                    | 0                    | 0.00012482836100362 | 0                    |
| Methylobacterium(100) | Otu087546 | 0                     | 0                    | 0                    | 0                   | 0.000110387459984546 |
| Methylobacterium(100) | Otu087553 | 0                     | 0                    | 0                    | 0                   | 0.000110387459984546 |
| Methylobacterium(100) | Otu087575 | 0                     | 0                    | 0.000109075043630017 | 0                   | 0                    |
| Methylobacterium(100) | Otu087582 | 0                     | 0.000124968757810547 | 0                    | 0                   | 0                    |
| Methylobacterium(100) | Otu087585 | 0                     | 0.000124968757810547 | 0                    | 0                   | 0                    |
| Methylobacterium(100) | Otu087627 | 0.0000778513040093422 | 0                    | 0                    | 0                   | 0                    |
| Methylobacterium(100) | Otu087658 | 0.0000778513040093422 | 0                    | 0                    | 0                   | 0                    |
| Methylobacterium(100) | Otu087692 | 0.0000778513040093422 | 0                    | 0                    | 0                   | 0                    |
| Methylobacterium(100) | Otu087699 | 0.0000778513040093422 | 0                    | 0                    | 0                   | 0                    |
| Novosphingobium(100)  | Otu087802 | 0                     | 0                    | 0                    | 0                   | 0.000110387459984546 |
| Sphingobium(100)      | Otu087855 | 0                     | 0                    | 0                    | 0                   | 0.000110387459984546 |
| unclassified(100)     | Otu087858 | 0                     | 0                    | 0                    | 0                   | 0.000110387459984546 |
| Sphingobium(100)      | Otu087939 | 0                     | 0                    | 0                    | 0                   | 0.000110387459984546 |
| Sphingopyxis(100)     | Otu087953 | 0                     | 0                    | 0                    | 0                   | 0.000110387459984546 |
| Sphingomonas(100)     | Otu088373 | 0                     | 0                    | 0                    | 0                   | 0.000110387459984546 |
| Novosphingobium(100)  | Otu088378 | 0                     | 0                    | 0                    | 0                   | 0.000110387459984546 |
| Aeromonas(100)        | Otu088695 | 0                     | 0                    | 0                    | 0.00012482836100362 | 0                    |
| Aeromonas(100)        | Otu088698 | 0                     | 0                    | 0                    | 0.00012482836100362 | 0                    |
| Aeromonas(100)        | Otu088750 | 0.0000778513040093422 | 0                    | 0                    | 0                   | 0                    |

|                   |           |                       |                      |                      |                     |                      |
|-------------------|-----------|-----------------------|----------------------|----------------------|---------------------|----------------------|
| Aeromonas(100)    | Otu088798 | 0                     | 0                    | 0                    | 0                   | 0.000110387459984546 |
| Aeromonas(100)    | Otu088833 | 0                     | 0                    | 0                    | 0.00012482836100362 | 0                    |
| Aeromonas(100)    | Otu088848 | 0                     | 0.000124968757810547 | 0                    | 0                   | 0                    |
| Aeromonas(100)    | Otu088853 | 0                     | 0                    | 0                    | 0.00012482836100362 | 0                    |
| Aeromonas(100)    | Otu088856 | 0                     | 0.000124968757810547 | 0                    | 0                   | 0                    |
| Aeromonas(100)    | Otu088865 | 0                     | 0                    | 0                    | 0.00012482836100362 | 0                    |
| Aeromonas(100)    | Otu088895 | 0.0000778513040093422 | 0                    | 0                    | 0                   | 0                    |
| Aeromonas(100)    | Otu088897 | 0                     | 0                    | 0.000109075043630017 | 0                   | 0                    |
| Aeromonas(100)    | Otu088916 | 0                     | 0                    | 0                    | 0.00012482836100362 | 0                    |
| Aeromonas(100)    | Otu088982 | 0                     | 0                    | 0                    | 0.00012482836100362 | 0                    |
| Aeromonas(100)    | Otu089063 | 0                     | 0                    | 0                    | 0                   | 0.000110387459984546 |
| Aeromonas(100)    | Otu089085 | 0                     | 0                    | 0                    | 0.00012482836100362 | 0                    |
| Aeromonas(100)    | Otu089093 | 0                     | 0                    | 0                    | 0                   | 0.000110387459984546 |
| Aeromonas(100)    | Otu089112 | 0                     | 0.000124968757810547 | 0                    | 0                   | 0                    |
| Aeromonas(100)    | Otu089140 | 0                     | 0.000124968757810547 | 0                    | 0                   | 0                    |
| Aeromonas(100)    | Otu089155 | 0                     | 0                    | 0                    | 0.00012482836100362 | 0                    |
| Aeromonas(100)    | Otu089317 | 0                     | 0.000124968757810547 | 0                    | 0                   | 0                    |
| Aeromonas(100)    | Otu089417 | 0                     | 0.000124968757810547 | 0                    | 0                   | 0                    |
| Aeromonas(100)    | Otu089426 | 0                     | 0                    | 0                    | 0.00012482836100362 | 0                    |
| Aeromonas(100)    | Otu089586 | 0                     | 0                    | 0                    | 0                   | 0.000110387459984546 |
| Enterococcus(100) | Otu089837 | 0                     | 0.000124968757810547 | 0                    | 0                   | 0                    |
| unclassified(100) | Otu089949 | 0                     | 0                    | 0                    | 0                   | 0.000110387459984546 |
| unclassified(100) | Otu089960 | 0                     | 0                    | 0.000109075043630017 | 0                   | 0                    |
| unclassified(100) | Otu089964 | 0                     | 0                    | 0                    | 0.00012482836100362 | 0                    |
| unclassified(100) | Otu089968 | 0                     | 0                    | 0                    | 0                   | 0.000110387459984546 |
| unclassified(100) | Otu089969 | 0                     | 0                    | 0                    | 0                   | 0.000110387459984546 |
| unclassified(100) | Otu090050 | 0                     | 0.000124968757810547 | 0                    | 0                   | 0                    |
| unclassified(100) | Otu090063 | 0.0000778513040093422 | 0                    | 0                    | 0                   | 0                    |
| Enterococcus(100) | Otu090498 | 0                     | 0                    | 0                    | 0                   | 0.000110387459984546 |
| Enterococcus(100) | Otu090519 | 0                     | 0                    | 0.000109075043630017 | 0                   | 0                    |
| Enterococcus(100) | Otu090521 | 0                     | 0.000124968757810547 | 0                    | 0                   | 0                    |
| Deinococcus(100)  | Otu090733 | 0                     | 0.000249937515621095 | 0                    | 0                   | 0.000220774919969092 |
| unclassified(100) | Otu090881 | 0                     | 0                    | 0                    | 0                   | 0.000110387459984546 |

|                           |           |                       |                      |                      |                     |                      |
|---------------------------|-----------|-----------------------|----------------------|----------------------|---------------------|----------------------|
| unclassified(100)         | Otu090882 | 0                     | 0                    | 0                    | 0                   | 0.00077271221989182  |
| unclassified(100)         | Otu090892 | 0                     | 0                    | 0                    | 0.00024965672200724 | 0                    |
| unclassified(100)         | Otu090948 | 0                     | 0                    | 0                    | 0                   | 0.000220774919969092 |
| unclassified(100)         | Otu090996 | 0                     | 0                    | 0.000109075043630017 | 0                   | 0                    |
| uncultured_bacterium(100) | Otu091018 | 0                     | 0                    | 0.000545375218150087 | 0                   | 0                    |
| uncultured_bacterium(100) | Otu091019 | 0                     | 0                    | 0.000109075043630017 | 0                   | 0                    |
| unclassified(100)         | Otu091079 | 0                     | 0.000124968757810547 | 0                    | 0                   | 0                    |
| unclassified(100)         | Otu091119 | 0                     | 0                    | 0.000109075043630017 | 0                   | 0                    |
| Caedibacter(100)          | Otu091172 | 0.0000778513040093422 | 0                    | 0                    | 0                   | 0                    |
| Aquicella(100)            | Otu091235 | 0                     | 0                    | 0                    | 0                   | 0.000662324759907275 |
| Caedibacter(100)          | Otu091242 | 0                     | 0.000124968757810547 | 0                    | 0                   | 0                    |
| Caedibacter(100)          | Otu091247 | 0.0000778513040093422 | 0                    | 0                    | 0                   | 0                    |
| Aquicella(100)            | Otu091515 | 0                     | 0.000124968757810547 | 0                    | 0                   | 0                    |
| Coxiella(100)             | Otu091553 | 0                     | 0.000624843789052737 | 0                    | 0                   | 0                    |
| unclassified(100)         | Otu091658 | 0                     | 0                    | 0.000109075043630017 | 0                   | 0                    |
| unclassified(100)         | Otu091661 | 0                     | 0                    | 0.000109075043630017 | 0                   | 0                    |
| unclassified(100)         | Otu091664 | 0                     | 0                    | 0.000109075043630017 | 0                   | 0                    |
| unclassified(100)         | Otu091700 | 0                     | 0.000124968757810547 | 0                    | 0                   | 0                    |
| unclassified(100)         | Otu091727 | 0                     | 0                    | 0                    | 0                   | 0.000110387459984546 |
| unclassified(100)         | Otu091728 | 0                     | 0                    | 0.000109075043630017 | 0                   | 0                    |
| unclassified(100)         | Otu091730 | 0                     | 0                    | 0.000109075043630017 | 0                   | 0                    |
| unclassified(100)         | Otu091732 | 0                     | 0                    | 0                    | 0                   | 0.000110387459984546 |
| unclassified(100)         | Otu091733 | 0                     | 0                    | 0                    | 0                   | 0.000110387459984546 |
| unclassified(100)         | Otu091737 | 0                     | 0                    | 0                    | 0                   | 0.000110387459984546 |
| unclassified(100)         | Otu091740 | 0                     | 0                    | 0.000109075043630017 | 0                   | 0                    |
| unclassified(100)         | Otu091744 | 0                     | 0                    | 0.000109075043630017 | 0                   | 0                    |
| unclassified(100)         | Otu091747 | 0                     | 0                    | 0.000109075043630017 | 0                   | 0                    |
| unclassified(100)         | Otu091750 | 0                     | 0                    | 0.000109075043630017 | 0                   | 0                    |
| unclassified(100)         | Otu091751 | 0                     | 0                    | 0.000109075043630017 | 0                   | 0                    |
| unclassified(100)         | Otu091752 | 0                     | 0                    | 0.000109075043630017 | 0                   | 0                    |
| unclassified(100)         | Otu091775 | 0                     | 0.000124968757810547 | 0                    | 0                   | 0                    |
| unclassified(100)         | Otu091817 | 0                     | 0.000124968757810547 | 0                    | 0                   | 0                    |
| unclassified(100)         | Otu091858 | 0.0000778513040093422 | 0                    | 0                    | 0                   | 0                    |



|                   |           |                       |                      |                      |   |                      |
|-------------------|-----------|-----------------------|----------------------|----------------------|---|----------------------|
| unclassified(100) | Otu091859 | 0.0000778513040093422 | 0                    | 0                    | 0 | 0                    |
| unclassified(100) | Otu092034 | 0                     | 0                    | 0                    | 0 | 0.000110387459984546 |
| unclassified(100) | Otu092035 | 0                     | 0                    | 0                    | 0 | 0.000110387459984546 |
| unclassified(100) | Otu092036 | 0                     | 0                    | 0.000109075043630017 | 0 | 0                    |
| unclassified(100) | Otu092039 | 0                     | 0                    | 0.000109075043630017 | 0 | 0                    |
| unclassified(100) | Otu092040 | 0                     | 0                    | 0.000109075043630017 | 0 | 0                    |
| unclassified(100) | Otu092042 | 0                     | 0                    | 0.000109075043630017 | 0 | 0                    |
| unclassified(100) | Otu092044 | 0                     | 0                    | 0.000109075043630017 | 0 | 0                    |
| unclassified(100) | Otu092048 | 0                     | 0                    | 0.000109075043630017 | 0 | 0                    |
| unclassified(100) | Otu092052 | 0                     | 0                    | 0.000109075043630017 | 0 | 0                    |
| unclassified(100) | Otu092054 | 0                     | 0                    | 0.000109075043630017 | 0 | 0                    |
| unclassified(100) | Otu092056 | 0                     | 0                    | 0.000109075043630017 | 0 | 0                    |
| unclassified(100) | Otu092263 | 0.0000778513040093422 | 0                    | 0                    | 0 | 0                    |
| unclassified(100) | Otu092266 | 0.0000778513040093422 | 0                    | 0                    | 0 | 0                    |
| unclassified(100) | Otu092268 | 0.0000778513040093422 | 0                    | 0                    | 0 | 0                    |
| unclassified(100) | Otu092291 | 0.0000778513040093422 | 0                    | 0                    | 0 | 0                    |
| unclassified(100) | Otu092294 | 0.0000778513040093422 | 0                    | 0                    | 0 | 0                    |
| unclassified(100) | Otu092296 | 0.0000778513040093422 | 0                    | 0                    | 0 | 0                    |
| unclassified(100) | Otu092297 | 0.0000778513040093422 | 0                    | 0                    | 0 | 0                    |
| unclassified(100) | Otu092325 | 0.0000778513040093422 | 0                    | 0                    | 0 | 0                    |
| unclassified(100) | Otu092340 | 0.0000778513040093422 | 0                    | 0                    | 0 | 0                    |
| unclassified(100) | Otu092341 | 0.0000778513040093422 | 0                    | 0                    | 0 | 0                    |
| unclassified(100) | Otu092349 | 0.0000778513040093422 | 0                    | 0                    | 0 | 0                    |
| unclassified(100) | Otu092351 | 0.0000778513040093422 | 0                    | 0                    | 0 | 0                    |
| unclassified(100) | Otu092352 | 0.0000778513040093422 | 0                    | 0                    | 0 | 0                    |
| unclassified(100) | Otu092356 | 0.0000778513040093422 | 0                    | 0                    | 0 | 0                    |
| unclassified(100) | Otu092357 | 0.0000778513040093422 | 0                    | 0                    | 0 | 0                    |
| unclassified(100) | Otu092360 | 0.0000778513040093422 | 0                    | 0                    | 0 | 0                    |
| unclassified(100) | Otu092363 | 0.0000778513040093422 | 0                    | 0                    | 0 | 0                    |
| unclassified(100) | Otu092374 | 0                     | 0                    | 0                    | 0 | 0.000110387459984546 |
| unclassified(100) | Otu092377 | 0                     | 0.000124968757810547 | 0                    | 0 | 0                    |
| unclassified(100) | Otu092386 | 0                     | 0                    | 0.000109075043630017 | 0 | 0                    |
| unclassified(100) | Otu092387 | 0                     | 0                    | 0.000109075043630017 | 0 | 0                    |

|                   |           |                       |                      |                      |                     |                      |
|-------------------|-----------|-----------------------|----------------------|----------------------|---------------------|----------------------|
| unclassified(100) | Otu092392 | 0                     | 0                    | 0.000109075043630017 | 0                   | 0                    |
| unclassified(100) | Otu092394 | 0                     | 0                    | 0.000109075043630017 | 0                   | 0                    |
| unclassified(100) | Otu092395 | 0                     | 0                    | 0                    | 0                   | 0.000110387459984546 |
| unclassified(100) | Otu092396 | 0                     | 0                    | 0                    | 0                   | 0.000110387459984546 |
| unclassified(100) | Otu092400 | 0                     | 0                    | 0                    | 0.00012482836100362 | 0                    |
| unclassified(100) | Otu092412 | 0                     | 0                    | 0                    | 0                   | 0.000110387459984546 |
| unclassified(100) | Otu092415 | 0                     | 0                    | 0                    | 0                   | 0.000110387459984546 |
| unclassified(100) | Otu092416 | 0                     | 0                    | 0.000109075043630017 | 0                   | 0                    |
| unclassified(100) | Otu092418 | 0                     | 0                    | 0.000109075043630017 | 0                   | 0                    |
| unclassified(100) | Otu092419 | 0                     | 0                    | 0.000109075043630017 | 0                   | 0                    |
| unclassified(100) | Otu092421 | 0                     | 0                    | 0.000109075043630017 | 0                   | 0                    |
| unclassified(100) | Otu092423 | 0                     | 0                    | 0                    | 0                   | 0.000110387459984546 |
| unclassified(100) | Otu092424 | 0                     | 0                    | 0                    | 0                   | 0.000110387459984546 |
| unclassified(100) | Otu092426 | 0                     | 0                    | 0.000109075043630017 | 0                   | 0                    |
| unclassified(100) | Otu092427 | 0                     | 0                    | 0.000109075043630017 | 0                   | 0                    |
| unclassified(100) | Otu092429 | 0                     | 0                    | 0                    | 0                   | 0.000110387459984546 |
| unclassified(100) | Otu092438 | 0                     | 0                    | 0                    | 0                   | 0.000110387459984546 |
| unclassified(100) | Otu092439 | 0                     | 0                    | 0                    | 0                   | 0.000110387459984546 |
| unclassified(100) | Otu092440 | 0                     | 0                    | 0                    | 0                   | 0.000110387459984546 |
| unclassified(100) | Otu092442 | 0                     | 0                    | 0                    | 0                   | 0.000110387459984546 |
| unclassified(100) | Otu092451 | 0                     | 0.000124968757810547 | 0                    | 0                   | 0                    |
| unclassified(100) | Otu092460 | 0.0000778513040093422 | 0                    | 0                    | 0                   | 0                    |
| unclassified(100) | Otu092462 | 0.0000778513040093422 | 0                    | 0                    | 0                   | 0                    |
| unclassified(100) | Otu092467 | 0                     | 0                    | 0                    | 0.00012482836100362 | 0                    |
| unclassified(100) | Otu092472 | 0                     | 0                    | 0                    | 0.00012482836100362 | 0                    |
| unclassified(100) | Otu092484 | 0                     | 0                    | 0                    | 0                   | 0.000110387459984546 |
| unclassified(100) | Otu092695 | 0                     | 0                    | 0                    | 0.00012482836100362 | 0                    |
| Paracoccus(100)   | Otu092702 | 0                     | 0                    | 0                    | 0.00012482836100362 | 0                    |
| unclassified(100) | Otu092704 | 0                     | 0.000124968757810547 | 0                    | 0                   | 0                    |
| Paracoccus(100)   | Otu092716 | 0                     | 0                    | 0                    | 0.00012482836100362 | 0                    |
| unclassified(100) | Otu092717 | 0                     | 0.000124968757810547 | 0                    | 0                   | 0                    |
| Paracoccus(100)   | Otu092724 | 0                     | 0.000124968757810547 | 0                    | 0                   | 0                    |
| unclassified(100) | Otu092725 | 0                     | 0                    | 0                    | 0.00012482836100362 | 0                    |

|                       |           |                       |                      |   |                     |                      |
|-----------------------|-----------|-----------------------|----------------------|---|---------------------|----------------------|
| Paracoccus(100)       | Otu092735 | 0                     | 0                    | 0 | 0.00012482836100362 | 0                    |
| Paracoccus(100)       | Otu092807 | 0                     | 0                    | 0 | 0.00012482836100362 | 0                    |
| Rubellimicrobium(100) | Otu092817 | 0                     | 0                    | 0 | 0                   | 0.000110387459984546 |
| Rubellimicrobium(100) | Otu093016 | 0                     | 0                    | 0 | 0.00149794033204344 | 0                    |
| Rubellimicrobium(100) | Otu093019 | 0                     | 0                    | 0 | 0.00049931344401448 | 0.000110387459984546 |
| unclassified(100)     | Otu093029 | 0                     | 0                    | 0 | 0                   | 0.000110387459984546 |
| Paracoccus(100)       | Otu093032 | 0                     | 0                    | 0 | 0                   | 0.000110387459984546 |
| Paracoccus(100)       | Otu093039 | 0                     | 0.000124968757810547 | 0 | 0                   | 0                    |
| Sphingomonas(100)     | Otu097522 | 0.0000778513040093422 | 0                    | 0 | 0                   | 0                    |
| Sphingomonas(100)     | Otu097524 | 0.0000778513040093422 | 0                    | 0 | 0                   | 0                    |
| Novosphingobium(100)  | Otu097525 | 0.0000778513040093422 | 0                    | 0 | 0                   | 0                    |
| Sphingobium(100)      | Otu097536 | 0.0000778513040093422 | 0                    | 0 | 0                   | 0                    |
| Novosphingobium(100)  | Otu097541 | 0                     | 0.000124968757810547 | 0 | 0                   | 0                    |
| Novosphingobium(100)  | Otu097545 | 0.0000778513040093422 | 0                    | 0 | 0                   | 0                    |
| Sphingobium(100)      | Otu097547 | 0.0000778513040093422 | 0                    | 0 | 0                   | 0                    |
| unclassified(100)     | Otu097568 | 0.0000778513040093422 | 0                    | 0 | 0                   | 0                    |
| unclassified(100)     | Otu097580 | 0.0000778513040093422 | 0                    | 0 | 0                   | 0                    |
| Sphingomonas(100)     | Otu097583 | 0.0000778513040093422 | 0                    | 0 | 0                   | 0                    |
| Sphingomonas(100)     | Otu097591 | 0.0000778513040093422 | 0                    | 0 | 0                   | 0                    |
| Sphingobium(100)      | Otu097594 | 0.0000778513040093422 | 0                    | 0 | 0                   | 0                    |
| unclassified(100)     | Otu097597 | 0                     | 0.000124968757810547 | 0 | 0                   | 0                    |
| Novosphingobium(100)  | Otu097614 | 0                     | 0.000124968757810547 | 0 | 0                   | 0                    |
| Novosphingobium(100)  | Otu097619 | 0.0000778513040093422 | 0                    | 0 | 0                   | 0                    |
| Novosphingobium(100)  | Otu097623 | 0.0000778513040093422 | 0                    | 0 | 0                   | 0                    |
| Novosphingobium(100)  | Otu097648 | 0.0000778513040093422 | 0                    | 0 | 0                   | 0                    |
| Novosphingobium(100)  | Otu097649 | 0.0000778513040093422 | 0                    | 0 | 0                   | 0                    |
| Novosphingobium(100)  | Otu097661 | 0.0000778513040093422 | 0                    | 0 | 0                   | 0                    |
| unclassified(100)     | Otu097663 | 0.0000778513040093422 | 0                    | 0 | 0                   | 0                    |
| Novosphingobium(100)  | Otu097673 | 0.0000778513040093422 | 0                    | 0 | 0                   | 0                    |
| Sphingomonas(100)     | Otu097690 | 0.000155702608018684  | 0                    | 0 | 0                   | 0                    |
| Novosphingobium(100)  | Otu097694 | 0.0000778513040093422 | 0                    | 0 | 0                   | 0                    |
| unclassified(100)     | Otu097706 | 0.0000778513040093422 | 0                    | 0 | 0                   | 0                    |
| Novosphingobium(100)  | Otu097726 | 0.0000778513040093422 | 0                    | 0 | 0                   | 0                    |

|                      |           |                       |   |                      |   |   |
|----------------------|-----------|-----------------------|---|----------------------|---|---|
| Sphingomonas(100)    | Otu097731 | 0.0000778513040093422 | 0 | 0                    | 0 | 0 |
| Novosphingobium(100) | Otu097734 | 0.0000778513040093422 | 0 | 0                    | 0 | 0 |
| Novosphingobium(100) | Otu097735 | 0.0000778513040093422 | 0 | 0                    | 0 | 0 |
| Sphingomonas(100)    | Otu097746 | 0.0000778513040093422 | 0 | 0                    | 0 | 0 |
| Sphingomonas(100)    | Otu097751 | 0.0000778513040093422 | 0 | 0                    | 0 | 0 |
| Sphingobium(100)     | Otu097756 | 0.0000778513040093422 | 0 | 0                    | 0 | 0 |
| unclassified(100)    | Otu097759 | 0.0000778513040093422 | 0 | 0                    | 0 | 0 |
| unclassified(100)    | Otu097768 | 0.0000778513040093422 | 0 | 0                    | 0 | 0 |
| Novosphingobium(100) | Otu097773 | 0.0000778513040093422 | 0 | 0                    | 0 | 0 |
| unclassified(100)    | Otu097781 | 0.0000778513040093422 | 0 | 0                    | 0 | 0 |
| unclassified(100)    | Otu097787 | 0                     | 0 | 0.000109075043630017 | 0 | 0 |
| unclassified(100)    | Otu097789 | 0.0000778513040093422 | 0 | 0                    | 0 | 0 |
| Novosphingobium(100) | Otu097794 | 0.0000778513040093422 | 0 | 0                    | 0 | 0 |
| unclassified(100)    | Otu097800 | 0                     | 0 | 0.000109075043630017 | 0 | 0 |
| Sphingobium(100)     | Otu097801 | 0                     | 0 | 0.000109075043630017 | 0 | 0 |
| unclassified(100)    | Otu097805 | 0.0000778513040093422 | 0 | 0                    | 0 | 0 |
| Sphingomonas(100)    | Otu097822 | 0                     | 0 | 0.000109075043630017 | 0 | 0 |
| unclassified(100)    | Otu097824 | 0.0000778513040093422 | 0 | 0                    | 0 | 0 |
| unclassified(100)    | Otu097831 | 0.0000778513040093422 | 0 | 0                    | 0 | 0 |
| unclassified(100)    | Otu097836 | 0.0000778513040093422 | 0 | 0                    | 0 | 0 |
| Novosphingobium(100) | Otu097847 | 0.0000778513040093422 | 0 | 0                    | 0 | 0 |
| Novosphingobium(100) | Otu097848 | 0.0000778513040093422 | 0 | 0                    | 0 | 0 |
| unclassified(100)    | Otu097861 | 0.0000778513040093422 | 0 | 0                    | 0 | 0 |
| unclassified(100)    | Otu097871 | 0.0000778513040093422 | 0 | 0                    | 0 | 0 |
| Novosphingobium(100) | Otu097886 | 0.0000778513040093422 | 0 | 0                    | 0 | 0 |
| Sphingomonas(100)    | Otu097892 | 0.0000778513040093422 | 0 | 0                    | 0 | 0 |
| unclassified(100)    | Otu097914 | 0.0000778513040093422 | 0 | 0                    | 0 | 0 |
| Novosphingobium(100) | Otu097916 | 0.0000778513040093422 | 0 | 0                    | 0 | 0 |
| Novosphingobium(100) | Otu097917 | 0                     | 0 | 0.000109075043630017 | 0 | 0 |
| Novosphingobium(100) | Otu097923 | 0.0000778513040093422 | 0 | 0                    | 0 | 0 |
| Novosphingobium(100) | Otu097925 | 0.0000778513040093422 | 0 | 0                    | 0 | 0 |
| Novosphingobium(100) | Otu097942 | 0.0000778513040093422 | 0 | 0                    | 0 | 0 |
| Novosphingobium(100) | Otu097951 | 0.0000778513040093422 | 0 | 0                    | 0 | 0 |

|                      |           |                       |   |                      |   |   |
|----------------------|-----------|-----------------------|---|----------------------|---|---|
| Novosphingobium(100) | Otu097954 | 0                     | 0 | 0.000109075043630017 | 0 | 0 |
| unclassified(100)    | Otu097957 | 0.0000778513040093422 | 0 | 0                    | 0 | 0 |
| Sphingomonas(100)    | Otu097960 | 0.0000778513040093422 | 0 | 0                    | 0 | 0 |
| unclassified(100)    | Otu097961 | 0.0000778513040093422 | 0 | 0                    | 0 | 0 |
| Novosphingobium(100) | Otu097969 | 0.0000778513040093422 | 0 | 0                    | 0 | 0 |
| unclassified(100)    | Otu097984 | 0.0000778513040093422 | 0 | 0                    | 0 | 0 |
| unclassified(100)    | Otu097989 | 0.0000778513040093422 | 0 | 0                    | 0 | 0 |
| unclassified(100)    | Otu097991 | 0.0000778513040093422 | 0 | 0                    | 0 | 0 |
| Novosphingobium(100) | Otu098000 | 0.0000778513040093422 | 0 | 0                    | 0 | 0 |
| unclassified(100)    | Otu098011 | 0.0000778513040093422 | 0 | 0                    | 0 | 0 |
| Sphingobium(100)     | Otu098012 | 0                     | 0 | 0.000109075043630017 | 0 | 0 |
| Novosphingobium(100) | Otu098018 | 0.0000778513040093422 | 0 | 0                    | 0 | 0 |
| Novosphingobium(100) | Otu098027 | 0.0000778513040093422 | 0 | 0                    | 0 | 0 |
| Novosphingobium(100) | Otu098028 | 0.0000778513040093422 | 0 | 0                    | 0 | 0 |
| Novosphingobium(100) | Otu098033 | 0                     | 0 | 0.000109075043630017 | 0 | 0 |
| Sphingopyxis(100)    | Otu098041 | 0                     | 0 | 0.000109075043630017 | 0 | 0 |
| Novosphingobium(100) | Otu098062 | 0.0000778513040093422 | 0 | 0                    | 0 | 0 |
| Novosphingobium(100) | Otu098067 | 0                     | 0 | 0.000109075043630017 | 0 | 0 |
| unclassified(100)    | Otu098078 | 0.0000778513040093422 | 0 | 0                    | 0 | 0 |
| unclassified(100)    | Otu098079 | 0                     | 0 | 0.000109075043630017 | 0 | 0 |
| unclassified(100)    | Otu098085 | 0.0000778513040093422 | 0 | 0                    | 0 | 0 |
| Novosphingobium(100) | Otu098097 | 0.0000778513040093422 | 0 | 0                    | 0 | 0 |
| Novosphingobium(100) | Otu098108 | 0.0000778513040093422 | 0 | 0                    | 0 | 0 |
| Sphingopyxis(100)    | Otu098132 | 0                     | 0 | 0.000109075043630017 | 0 | 0 |
| Novosphingobium(100) | Otu098157 | 0                     | 0 | 0.000109075043630017 | 0 | 0 |
| unclassified(100)    | Otu098163 | 0.0000778513040093422 | 0 | 0                    | 0 | 0 |
| Sphingomonas(100)    | Otu098203 | 0                     | 0 | 0.000109075043630017 | 0 | 0 |
| Novosphingobium(100) | Otu098214 | 0.0000778513040093422 | 0 | 0                    | 0 | 0 |
| Novosphingobium(100) | Otu098216 | 0                     | 0 | 0.000109075043630017 | 0 | 0 |
| Sphingobium(100)     | Otu098234 | 0                     | 0 | 0.000109075043630017 | 0 | 0 |
| Sphingobium(100)     | Otu098241 | 0                     | 0 | 0.000109075043630017 | 0 | 0 |
| Sphingobium(100)     | Otu098261 | 0.0000778513040093422 | 0 | 0                    | 0 | 0 |
| Novosphingobium(100) | Otu098267 | 0.0000778513040093422 | 0 | 0                    | 0 | 0 |

|                      |           |                       |   |                      |                     |                      |
|----------------------|-----------|-----------------------|---|----------------------|---------------------|----------------------|
| Novosphingobium(100) | Otu098272 | 0.0000778513040093422 | 0 | 0                    | 0                   | 0                    |
| Novosphingobium(100) | Otu098275 | 0.0000778513040093422 | 0 | 0                    | 0                   | 0                    |
| Novosphingobium(100) | Otu098280 | 0.0000778513040093422 | 0 | 0                    | 0                   | 0                    |
| Novosphingobium(100) | Otu098287 | 0.0000778513040093422 | 0 | 0                    | 0                   | 0                    |
| unclassified(100)    | Otu098295 | 0.0000778513040093422 | 0 | 0                    | 0                   | 0                    |
| Novosphingobium(100) | Otu098335 | 0.0000778513040093422 | 0 | 0                    | 0                   | 0                    |
| Sphingobium(100)     | Otu098358 | 0.0000778513040093422 | 0 | 0                    | 0                   | 0                    |
| Novosphingobium(100) | Otu098359 | 0.0000778513040093422 | 0 | 0                    | 0                   | 0                    |
| unclassified(100)    | Otu098362 | 0.0000778513040093422 | 0 | 0                    | 0                   | 0                    |
| Sphingomonas(100)    | Otu098363 | 0.0000778513040093422 | 0 | 0                    | 0                   | 0                    |
| Novosphingobium(100) | Otu098375 | 0.0000778513040093422 | 0 | 0                    | 0                   | 0                    |
| Novosphingobium(100) | Otu098384 | 0.0000778513040093422 | 0 | 0                    | 0                   | 0                    |
| unclassified(100)    | Otu098394 | 0.0000778513040093422 | 0 | 0                    | 0                   | 0                    |
| Sphingobium(100)     | Otu098400 | 0                     | 0 | 0.000109075043630017 | 0                   | 0                    |
| unclassified(100)    | Otu098401 | 0                     | 0 | 0.000109075043630017 | 0                   | 0                    |
| Sphingobium(100)     | Otu098404 | 0                     | 0 | 0.000109075043630017 | 0                   | 0                    |
| Novosphingobium(100) | Otu098412 | 0.0000778513040093422 | 0 | 0                    | 0                   | 0                    |
| Novosphingobium(100) | Otu098425 | 0.0000778513040093422 | 0 | 0                    | 0                   | 0                    |
| Novosphingobium(100) | Otu098431 | 0.0000778513040093422 | 0 | 0                    | 0                   | 0                    |
| Novosphingobium(100) | Otu098455 | 0                     | 0 | 0.000109075043630017 | 0                   | 0                    |
| unclassified(100)    | Otu098464 | 0.0000778513040093422 | 0 | 0                    | 0                   | 0                    |
| Novosphingobium(100) | Otu098468 | 0.0000778513040093422 | 0 | 0                    | 0                   | 0                    |
| unclassified(100)    | Otu098485 | 0                     | 0 | 0.000109075043630017 | 0                   | 0                    |
| unclassified(100)    | Otu098492 | 0.0000778513040093422 | 0 | 0                    | 0                   | 0                    |
| Novosphingobium(100) | Otu098525 | 0                     | 0 | 0                    | 0.00012482836100362 | 0                    |
| Sphingomonas(100)    | Otu098556 | 0                     | 0 | 0                    | 0                   | 0.000110387459984546 |
| Novosphingobium(100) | Otu098577 | 0                     | 0 | 0                    | 0.00012482836100362 | 0                    |
| Sphingomonas(100)    | Otu098650 | 0                     | 0 | 0                    | 0                   | 0.000110387459984546 |
| unclassified(100)    | Otu098690 | 0                     | 0 | 0                    | 0.00012482836100362 | 0                    |
| Sphingobium(100)     | Otu098710 | 0                     | 0 | 0                    | 0                   | 0.000110387459984546 |
| Sphingomonas(100)    | Otu098742 | 0                     | 0 | 0                    | 0.00012482836100362 | 0                    |
| Sphingomonas(100)    | Otu098743 | 0                     | 0 | 0                    | 0.00012482836100362 | 0                    |
| unclassified(100)    | Otu098761 | 0                     | 0 | 0                    | 0.00012482836100362 | 0                    |

|                      |           |                       |                      |                      |                     |                      |
|----------------------|-----------|-----------------------|----------------------|----------------------|---------------------|----------------------|
| Sphingobium(100)     | Otu098762 | 0                     | 0                    | 0                    | 0                   | 0.000110387459984546 |
| Sphingobium(100)     | Otu098816 | 0                     | 0                    | 0                    | 0                   | 0.000110387459984546 |
| unclassified(100)    | Otu098822 | 0                     | 0                    | 0                    | 0                   | 0.000110387459984546 |
| Sphingomonas(100)    | Otu098899 | 0                     | 0                    | 0.000109075043630017 | 0                   | 0                    |
| Sphingomonas(100)    | Otu098911 | 0                     | 0                    | 0                    | 0.00012482836100362 | 0                    |
| Sphingobium(100)     | Otu098914 | 0                     | 0                    | 0                    | 0.00012482836100362 | 0                    |
| Novosphingobium(100) | Otu098967 | 0                     | 0                    | 0.000109075043630017 | 0                   | 0                    |
| Sphingomonas(100)    | Otu098968 | 0                     | 0                    | 0                    | 0.00012482836100362 | 0                    |
| Novosphingobium(100) | Otu099018 | 0                     | 0                    | 0                    | 0.00012482836100362 | 0                    |
| Sphingobium(100)     | Otu099069 | 0                     | 0                    | 0                    | 0.00012482836100362 | 0                    |
| Novosphingobium(100) | Otu099072 | 0                     | 0                    | 0                    | 0.00012482836100362 | 0                    |
| Sphingobium(100)     | Otu099090 | 0                     | 0                    | 0                    | 0.00012482836100362 | 0                    |
| Novosphingobium(100) | Otu099119 | 0.0000778513040093422 | 0                    | 0                    | 0                   | 0                    |
| unclassified(100)    | Otu099121 | 0.0000778513040093422 | 0                    | 0                    | 0                   | 0                    |
| Sphingomonas(100)    | Otu099122 | 0.0000778513040093422 | 0                    | 0                    | 0                   | 0                    |
| Sphingopyxis(100)    | Otu099134 | 0                     | 0                    | 0                    | 0.00012482836100362 | 0                    |
| Blastomonas(100)     | Otu099168 | 0.0000778513040093422 | 0                    | 0                    | 0                   | 0                    |
| Novosphingobium(100) | Otu099175 | 0.0000778513040093422 | 0                    | 0                    | 0                   | 0                    |
| unclassified(100)    | Otu099190 | 0                     | 0                    | 0                    | 0.00012482836100362 | 0                    |
| Sphingobium(100)     | Otu099398 | 0                     | 0                    | 0                    | 0.00012482836100362 | 0                    |
| Novosphingobium(100) | Otu100600 | 0                     | 0.000124968757810547 | 0                    | 0                   | 0                    |
| Sphingomonas(100)    | Otu100607 | 0.0000778513040093422 | 0                    | 0                    | 0                   | 0                    |
| unclassified(100)    | Otu100632 | 0.0000778513040093422 | 0                    | 0                    | 0                   | 0                    |
| Sphingomonas(100)    | Otu100638 | 0.0000778513040093422 | 0                    | 0                    | 0                   | 0                    |
| Sphingomonas(100)    | Otu100646 | 0.0000778513040093422 | 0                    | 0                    | 0                   | 0                    |
| unclassified(100)    | Otu100820 | 0.0000778513040093422 | 0                    | 0                    | 0                   | 0                    |
| unclassified(100)    | Otu101231 | 0.0000778513040093422 | 0                    | 0                    | 0                   | 0                    |
| unclassified(100)    | Otu101233 | 0.0000778513040093422 | 0                    | 0                    | 0                   | 0                    |
| Novosphingobium(100) | Otu101235 | 0.0000778513040093422 | 0                    | 0                    | 0                   | 0                    |
| Novosphingobium(100) | Otu101271 | 0.0000778513040093422 | 0                    | 0                    | 0                   | 0                    |
| Novosphingobium(100) | Otu101289 | 0.0000778513040093422 | 0                    | 0                    | 0                   | 0                    |
| Novosphingobium(100) | Otu101291 | 0.0000778513040093422 | 0                    | 0                    | 0                   | 0                    |
| Sphingomonas(100)    | Otu101305 | 0                     | 0.000124968757810547 | 0                    | 0                   | 0                    |

|                      |           |                       |                      |                      |                     |                      |
|----------------------|-----------|-----------------------|----------------------|----------------------|---------------------|----------------------|
| Novosphingobium(100) | Otu101368 | 0.0000778513040093422 | 0                    | 0                    | 0                   | 0                    |
| unclassified(100)    | Otu101387 | 0.0000778513040093422 | 0                    | 0                    | 0                   | 0                    |
| unclassified(100)    | Otu101400 | 0.0000778513040093422 | 0                    | 0                    | 0                   | 0                    |
| Novosphingobium(100) | Otu101401 | 0.0000778513040093422 | 0                    | 0                    | 0                   | 0                    |
| unclassified(100)    | Otu101413 | 0.0000778513040093422 | 0                    | 0                    | 0                   | 0                    |
| unclassified(100)    | Otu101425 | 0.0000778513040093422 | 0                    | 0                    | 0                   | 0                    |
| unclassified(100)    | Otu101429 | 0                     | 0.000124968757810547 | 0                    | 0                   | 0                    |
| unclassified(100)    | Otu101434 | 0.0000778513040093422 | 0                    | 0                    | 0                   | 0                    |
| unclassified(100)    | Otu105370 | 0                     | 0                    | 0.000109075043630017 | 0                   | 0                    |
| unclassified(100)    | Otu105371 | 0                     | 0                    | 0                    | 0.00099862688802896 | 0                    |
| unclassified(100)    | Otu105372 | 0                     | 0                    | 0                    | 0.00012482836100362 | 0                    |
| unclassified(100)    | Otu105383 | 0                     | 0                    | 0                    | 0                   | 0.000110387459984546 |
| unclassified(100)    | Otu105420 | 0                     | 0.000124968757810547 | 0                    | 0                   | 0                    |
| unclassified(100)    | Otu105421 | 0                     | 0                    | 0.000109075043630017 | 0                   | 0                    |
| unclassified(100)    | Otu105428 | 0                     | 0                    | 0.000109075043630017 | 0                   | 0                    |
| unclassified(100)    | Otu105430 | 0                     | 0                    | 0.000109075043630017 | 0                   | 0                    |
| unclassified(100)    | Otu105665 | 0                     | 0.000124968757810547 | 0                    | 0                   | 0                    |
| unclassified(100)    | Otu105803 | 0                     | 0.000124968757810547 | 0                    | 0                   | 0                    |
| unclassified(100)    | Otu105805 | 0                     | 0                    | 0.000109075043630017 | 0                   | 0                    |
| Legionella(100)      | Otu106014 | 0                     | 0                    | 0                    | 0                   | 0.000110387459984546 |
| Legionella(100)      | Otu106020 | 0                     | 0                    | 0                    | 0                   | 0.000110387459984546 |
| Legionella(100)      | Otu106031 | 0                     | 0                    | 0                    | 0                   | 0.000110387459984546 |
| Legionella(100)      | Otu106040 | 0                     | 0                    | 0                    | 0                   | 0.000441549839938183 |
| unclassified(100)    | Otu106045 | 0                     | 0.000124968757810547 | 0                    | 0                   | 0                    |
| unclassified(100)    | Otu106051 | 0                     | 0.000124968757810547 | 0                    | 0                   | 0                    |
| unclassified(100)    | Otu106052 | 0                     | 0                    | 0                    | 0.00012482836100362 | 0                    |
| unclassified(100)    | Otu106053 | 0                     | 0                    | 0                    | 0.00012482836100362 | 0                    |
| unclassified(100)    | Otu106065 | 0                     | 0                    | 0                    | 0                   | 0.000110387459984546 |
| unclassified(100)    | Otu106075 | 0                     | 0                    | 0                    | 0                   | 0.000110387459984546 |
| Afipia(100)          | Otu106352 | 0                     | 0.000124968757810547 | 0                    | 0                   | 0                    |
| unclassified(100)    | Otu106354 | 0.0000778513040093422 | 0                    | 0                    | 0                   | 0                    |
| unclassified(100)    | Otu106410 | 0.0000778513040093422 | 0                    | 0                    | 0                   | 0                    |
| Bradyrhizobium(100)  | Otu106423 | 0                     | 0                    | 0.000109075043630017 | 0                   | 0                    |



|                     |           |                       |                      |                      |   |                      |
|---------------------|-----------|-----------------------|----------------------|----------------------|---|----------------------|
| Afipia(100)         | Otu106462 | 0.0000778513040093422 | 0                    | 0                    | 0 | 0                    |
| Afipia(100)         | Otu106486 | 0.0000778513040093422 | 0                    | 0                    | 0 | 0                    |
| unclassified(100)   | Otu106487 | 0.0000778513040093422 | 0                    | 0                    | 0 | 0                    |
| unclassified(100)   | Otu106499 | 0.0000778513040093422 | 0                    | 0                    | 0 | 0                    |
| unclassified(100)   | Otu106509 | 0                     | 0                    | 0.000109075043630017 | 0 | 0                    |
| unclassified(100)   | Otu106511 | 0                     | 0                    | 0.000109075043630017 | 0 | 0                    |
| unclassified(100)   | Otu106512 | 0                     | 0                    | 0.000109075043630017 | 0 | 0                    |
| unclassified(100)   | Otu106513 | 0                     | 0                    | 0.000109075043630017 | 0 | 0                    |
| unclassified(100)   | Otu106515 | 0                     | 0                    | 0                    | 0 | 0.000110387459984546 |
| unclassified(100)   | Otu106516 | 0                     | 0                    | 0.000109075043630017 | 0 | 0                    |
| unclassified(100)   | Otu106524 | 0.0000778513040093422 | 0                    | 0                    | 0 | 0                    |
| Bradyrhizobium(100) | Otu106535 | 0.0000778513040093422 | 0                    | 0                    | 0 | 0                    |
| Afipia(100)         | Otu106561 | 0.0000778513040093422 | 0                    | 0                    | 0 | 0                    |
| Afipia(100)         | Otu106588 | 0.0000778513040093422 | 0                    | 0                    | 0 | 0                    |
| Spirosoma(100)      | Otu106597 | 0.0000778513040093422 | 0                    | 0                    | 0 | 0                    |
| unclassified(100)   | Otu106605 | 0.0000778513040093422 | 0                    | 0                    | 0 | 0                    |
| Spirosoma(100)      | Otu106607 | 0.0000778513040093422 | 0                    | 0                    | 0 | 0                    |
| Spirosoma(100)      | Otu106654 | 0.0000778513040093422 | 0                    | 0                    | 0 | 0                    |
| Spirosoma(100)      | Otu106659 | 0.0000778513040093422 | 0                    | 0                    | 0 | 0                    |
| Spirosoma(100)      | Otu106671 | 0.0000778513040093422 | 0                    | 0                    | 0 | 0                    |
| Arcicella(100)      | Otu106672 | 0                     | 0.000124968757810547 | 0                    | 0 | 0                    |
| unclassified(100)   | Otu106727 | 0                     | 0                    | 0                    | 0 | 0.000110387459984546 |
| Bradyrhizobium(100) | Otu106754 | 0                     | 0                    | 0                    | 0 | 0.000110387459984546 |
| unclassified(100)   | Otu106814 | 0                     | 0                    | 0                    | 0 | 0.000110387459984546 |
| unclassified(100)   | Otu106914 | 0.0000778513040093422 | 0                    | 0                    | 0 | 0                    |
| unclassified(100)   | Otu107092 | 0.0000778513040093422 | 0                    | 0                    | 0 | 0                    |
| unclassified(100)   | Otu107094 | 0.0000778513040093422 | 0                    | 0                    | 0 | 0                    |
| unclassified(100)   | Otu107123 | 0                     | 0.000124968757810547 | 0                    | 0 | 0                    |
| unclassified(100)   | Otu107128 | 0.0000778513040093422 | 0                    | 0                    | 0 | 0                    |
| unclassified(100)   | Otu107131 | 0                     | 0.000124968757810547 | 0                    | 0 | 0                    |
| unclassified(100)   | Otu107134 | 0                     | 0.000124968757810547 | 0                    | 0 | 0                    |
| unclassified(100)   | Otu107135 | 0                     | 0.000124968757810547 | 0                    | 0 | 0                    |
| unclassified(100)   | Otu107139 | 0.0000778513040093422 | 0                    | 0                    | 0 | 0                    |

|                                             |           |                       |                      |                      |                     |                      |
|---------------------------------------------|-----------|-----------------------|----------------------|----------------------|---------------------|----------------------|
| unclassified(100)                           | Otu107270 | 0.0000778513040093422 | 0                    | 0                    | 0                   | 0                    |
| unclassified(100)                           | Otu107298 | 0.0000778513040093422 | 0                    | 0                    | 0                   | 0                    |
| unclassified(100)                           | Otu107301 | 0.0000778513040093422 | 0                    | 0                    | 0                   | 0                    |
| unclassified(100)                           | Otu107313 | 0.0000778513040093422 | 0                    | 0                    | 0                   | 0                    |
| unclassified(100)                           | Otu107315 | 0.0000778513040093422 | 0                    | 0                    | 0                   | 0                    |
| unclassified(100)                           | Otu107321 | 0.0000778513040093422 | 0                    | 0                    | 0                   | 0                    |
| unclassified(100)                           | Otu107323 | 0.0000778513040093422 | 0                    | 0                    | 0                   | 0                    |
| unclassified(100)                           | Otu107330 | 0.0000778513040093422 | 0                    | 0                    | 0                   | 0                    |
| Neisseria(100)                              | Otu108333 | 0                     | 0                    | 0                    | 0.00012482836100362 | 0                    |
| uncultured(100)                             | Otu108348 | 0                     | 0                    | 0                    | 0                   | 0.000110387459984546 |
| proteobacterium_Ellin181(100)               | Otu108399 | 0                     | 0                    | 0.000109075043630017 | 0                   | 0                    |
| proteobacterium_Ellin181(100)               | Otu108425 | 0                     | 0                    | 0.000109075043630017 | 0                   | 0                    |
| Fusobacterium(100)                          | Otu108461 | 0                     | 0                    | 0                    | 0.00012482836100362 | 0                    |
| uncultured_bacterium(100)                   | Otu108483 | 0                     | 0                    | 0.000109075043630017 | 0                   | 0                    |
| unclassified(100)                           | Otu108488 | 0                     | 0                    | 0                    | 0                   | 0.000220774919969092 |
| uncultured(100)                             | Otu108523 | 0                     | 0                    | 0                    | 0                   | 0.000110387459984546 |
| Legionella(100)                             | Otu108626 | 0.0000778513040093422 | 0                    | 0                    | 0                   | 0                    |
| Legionella(100)                             | Otu108630 | 0                     | 0.000249937515621095 | 0                    | 0                   | 0                    |
| Legionella(100)                             | Otu108650 | 0                     | 0                    | 0.00043630017452007  | 0                   | 0                    |
| unclassified(100)                           | Otu108682 | 0                     | 0                    | 0.000327225130890052 | 0                   | 0                    |
| uncultured_bacterium(100)                   | Otu108747 | 0                     | 0.00124968757810547  | 0                    | 0                   | 0                    |
| Leptotrichia(100)                           | Otu108811 | 0                     | 0                    | 0                    | 0.00012482836100362 | 0                    |
| unclassified(100)                           | Otu108843 | 0                     | 0                    | 0                    | 0.00012482836100362 | 0                    |
| unclassified(100)                           | Otu108863 | 0                     | 0                    | 0                    | 0.00012482836100362 | 0                    |
| unclassified(100)                           | Otu108871 | 0                     | 0.000124968757810547 | 0                    | 0                   | 0                    |
| uncultured_Bacteroidetes_bacterium(100)     | Otu108924 | 0                     | 0                    | 0.000109075043630017 | 0                   | 0                    |
| uncultured_Sphingomonadaceae_bacterium(100) | Otu109044 | 0                     | 0                    | 0                    | 0.00024965672200724 | 0                    |
| unclassified(100)                           | Otu109092 | 0                     | 0.000124968757810547 | 0                    | 0                   | 0                    |
| unclassified(100)                           | Otu109093 | 0                     | 0                    | 0.000109075043630017 | 0                   | 0                    |
| unclassified(100)                           | Otu109094 | 0                     | 0                    | 0.000109075043630017 | 0                   | 0                    |
| unclassified(100)                           | Otu109096 | 0                     | 0                    | 0                    | 0                   | 0.000110387459984546 |
| unclassified(100)                           | Otu109173 | 0                     | 0.000124968757810547 | 0                    | 0                   | 0                    |
| uncultured_bacterium(100)                   | Otu109180 | 0                     | 0.000249937515621095 | 0                    | 0                   | 0                    |

|                     |           |                       |                      |                      |                     |                      |
|---------------------|-----------|-----------------------|----------------------|----------------------|---------------------|----------------------|
| unclassified(100)   | Otu109181 | 0                     | 0.00162459385153712  | 0                    | 0                   | 0                    |
| Patulibacter(100)   | Otu109201 | 0.0000778513040093422 | 0                    | 0                    | 0                   | 0                    |
| unclassified(100)   | Otu109229 | 0                     | 0.000124968757810547 | 0                    | 0                   | 0                    |
| unclassified(100)   | Otu109239 | 0                     | 0                    | 0.000109075043630017 | 0                   | 0                    |
| unclassified(100)   | Otu109283 | 0.0000778513040093422 | 0                    | 0                    | 0                   | 0                    |
| unclassified(100)   | Otu109567 | 0                     | 0                    | 0                    | 0                   | 0.000110387459984546 |
| unclassified(100)   | Otu109572 | 0                     | 0                    | 0                    | 0                   | 0.000110387459984546 |
| Gluconobacter(100)  | Otu109579 | 0                     | 0                    | 0                    | 0                   | 0.00331162379953637  |
| unclassified(100)   | Otu109605 | 0                     | 0.000124968757810547 | 0                    | 0                   | 0                    |
| unclassified(100)   | Otu109607 | 0                     | 0.000124968757810547 | 0                    | 0                   | 0                    |
| uncultured(100)     | Otu109614 | 0                     | 0.000124968757810547 | 0                    | 0                   | 0                    |
| Craurococcus(100)   | Otu109627 | 0                     | 0                    | 0                    | 0.00037448508301086 | 0                    |
| unclassified(100)   | Otu109628 | 0                     | 0                    | 0                    | 0.00024965672200724 | 0                    |
| unclassified(100)   | Otu109644 | 0                     | 0                    | 0.000109075043630017 | 0                   | 0                    |
| unclassified(100)   | Otu109647 | 0                     | 0                    | 0                    | 0                   | 0.000110387459984546 |
| Gluconobacter(100)  | Otu109672 | 0                     | 0                    | 0                    | 0                   | 0.000110387459984546 |
| Tanticharoenia(100) | Otu109673 | 0                     | 0                    | 0                    | 0                   | 0.000110387459984546 |
| Gluconobacter(100)  | Otu109676 | 0                     | 0                    | 0                    | 0                   | 0.000110387459984546 |
| unclassified(100)   | Otu109733 | 0                     | 0                    | 0                    | 0.00012482836100362 | 0                    |
| unclassified(100)   | Otu109740 | 0                     | 0                    | 0                    | 0.00012482836100362 | 0                    |
| Gluconobacter(100)  | Otu109743 | 0                     | 0                    | 0                    | 0                   | 0.000110387459984546 |
| Gluconobacter(100)  | Otu109744 | 0                     | 0                    | 0                    | 0                   | 0.000110387459984546 |
| Gluconobacter(100)  | Otu109747 | 0                     | 0                    | 0                    | 0                   | 0.000110387459984546 |
| unclassified(100)   | Otu109752 | 0                     | 0                    | 0                    | 0                   | 0.000110387459984546 |
| Gluconobacter(100)  | Otu110284 | 0                     | 0                    | 0                    | 0                   | 0.000110387459984546 |
| Gluconobacter(100)  | Otu110289 | 0                     | 0                    | 0                    | 0                   | 0.000110387459984546 |
| Gluconobacter(100)  | Otu110304 | 0                     | 0                    | 0                    | 0                   | 0.000110387459984546 |
| unclassified(100)   | Otu110336 | 0                     | 0                    | 0                    | 0                   | 0.000110387459984546 |
| Gluconobacter(100)  | Otu110337 | 0                     | 0                    | 0                    | 0                   | 0.000110387459984546 |
| Gluconobacter(100)  | Otu110340 | 0                     | 0                    | 0                    | 0                   | 0.000110387459984546 |
| unclassified(100)   | Otu110344 | 0                     | 0                    | 0                    | 0                   | 0.000110387459984546 |
| unclassified(100)   | Otu110357 | 0                     | 0                    | 0                    | 0                   | 0.000110387459984546 |
| Gluconobacter(100)  | Otu110359 | 0                     | 0                    | 0                    | 0                   | 0.000110387459984546 |

|                    |           |   |   |   |   |                      |
|--------------------|-----------|---|---|---|---|----------------------|
| unclassified(100)  | Otu110367 | 0 | 0 | 0 | 0 | 0.000110387459984546 |
| unclassified(100)  | Otu110370 | 0 | 0 | 0 | 0 | 0.000110387459984546 |
| Gluconobacter(100) | Otu110376 | 0 | 0 | 0 | 0 | 0.000110387459984546 |
| unclassified(100)  | Otu110379 | 0 | 0 | 0 | 0 | 0.000110387459984546 |
| Gluconobacter(100) | Otu110383 | 0 | 0 | 0 | 0 | 0.000110387459984546 |
| Gluconobacter(100) | Otu110384 | 0 | 0 | 0 | 0 | 0.000110387459984546 |
| unclassified(100)  | Otu110388 | 0 | 0 | 0 | 0 | 0.000110387459984546 |
| Gluconobacter(100) | Otu110395 | 0 | 0 | 0 | 0 | 0.000110387459984546 |
| Gluconobacter(100) | Otu110550 | 0 | 0 | 0 | 0 | 0.000110387459984546 |
| Gluconobacter(100) | Otu110581 | 0 | 0 | 0 | 0 | 0.000110387459984546 |
| unclassified(100)  | Otu110582 | 0 | 0 | 0 | 0 | 0.000110387459984546 |
| unclassified(100)  | Otu110583 | 0 | 0 | 0 | 0 | 0.000110387459984546 |
| unclassified(100)  | Otu110591 | 0 | 0 | 0 | 0 | 0.000110387459984546 |
| Gluconobacter(100) | Otu110594 | 0 | 0 | 0 | 0 | 0.000110387459984546 |
| Gluconobacter(100) | Otu110595 | 0 | 0 | 0 | 0 | 0.000110387459984546 |
| unclassified(100)  | Otu110597 | 0 | 0 | 0 | 0 | 0.000110387459984546 |
| Gluconobacter(100) | Otu110598 | 0 | 0 | 0 | 0 | 0.000110387459984546 |
| unclassified(100)  | Otu110619 | 0 | 0 | 0 | 0 | 0.000110387459984546 |
| unclassified(100)  | Otu110643 | 0 | 0 | 0 | 0 | 0.000110387459984546 |
| unclassified(100)  | Otu110647 | 0 | 0 | 0 | 0 | 0.000110387459984546 |
| Gluconobacter(100) | Otu110649 | 0 | 0 | 0 | 0 | 0.000110387459984546 |
| unclassified(100)  | Otu110650 | 0 | 0 | 0 | 0 | 0.000110387459984546 |
| unclassified(100)  | Otu110654 | 0 | 0 | 0 | 0 | 0.000110387459984546 |
| unclassified(100)  | Otu110656 | 0 | 0 | 0 | 0 | 0.000110387459984546 |
| Gluconobacter(100) | Otu110664 | 0 | 0 | 0 | 0 | 0.000110387459984546 |
| unclassified(100)  | Otu110739 | 0 | 0 | 0 | 0 | 0.000110387459984546 |
| unclassified(100)  | Otu110741 | 0 | 0 | 0 | 0 | 0.000110387459984546 |
| Gluconobacter(100) | Otu110742 | 0 | 0 | 0 | 0 | 0.000110387459984546 |
| unclassified(100)  | Otu110743 | 0 | 0 | 0 | 0 | 0.000110387459984546 |
| Gluconobacter(100) | Otu110744 | 0 | 0 | 0 | 0 | 0.000110387459984546 |
| Gluconobacter(100) | Otu110785 | 0 | 0 | 0 | 0 | 0.000110387459984546 |
| Gluconobacter(100) | Otu110787 | 0 | 0 | 0 | 0 | 0.000110387459984546 |
| Gluconobacter(100) | Otu110790 | 0 | 0 | 0 | 0 | 0.000110387459984546 |

|                    |           |                       |                      |                      |                     |                      |
|--------------------|-----------|-----------------------|----------------------|----------------------|---------------------|----------------------|
| Gluconobacter(100) | Otu110812 | 0                     | 0                    | 0                    | 0                   | 0.000110387459984546 |
| unclassified(100)  | Otu110844 | 0                     | 0                    | 0                    | 0                   | 0.000110387459984546 |
| unclassified(100)  | Otu110849 | 0                     | 0                    | 0                    | 0                   | 0.000110387459984546 |
| Gluconobacter(100) | Otu110850 | 0                     | 0                    | 0                    | 0                   | 0.000110387459984546 |
| unclassified(100)  | Otu110859 | 0                     | 0                    | 0                    | 0                   | 0.000110387459984546 |
| Gluconobacter(100) | Otu110863 | 0                     | 0                    | 0                    | 0                   | 0.000110387459984546 |
| Gluconobacter(100) | Otu110864 | 0                     | 0                    | 0                    | 0                   | 0.000110387459984546 |
| Gluconobacter(100) | Otu110881 | 0                     | 0                    | 0                    | 0                   | 0.000110387459984546 |
| Craurococcus(100)  | Otu110925 | 0                     | 0                    | 0                    | 0.00024965672200724 | 0                    |
| unclassified(100)  | Otu111874 | 0                     | 0.000124968757810547 | 0                    | 0                   | 0                    |
| unclassified(100)  | Otu111875 | 0                     | 0.000124968757810547 | 0                    | 0                   | 0                    |
| unclassified(100)  | Otu111876 | 0                     | 0.000124968757810547 | 0                    | 0                   | 0                    |
| unclassified(100)  | Otu111886 | 0                     | 0.000124968757810547 | 0                    | 0                   | 0                    |
| unclassified(100)  | Otu111910 | 0                     | 0.000124968757810547 | 0                    | 0                   | 0                    |
| unclassified(100)  | Otu111912 | 0                     | 0.000124968757810547 | 0                    | 0                   | 0                    |
| unclassified(100)  | Otu118566 | 0                     | 0                    | 0.000109075043630017 | 0                   | 0                    |
| unclassified(100)  | Otu122060 | 0                     | 0.000124968757810547 | 0                    | 0                   | 0                    |
| unclassified(100)  | Otu122065 | 0                     | 0.000124968757810547 | 0                    | 0                   | 0                    |
| unclassified(100)  | Otu122067 | 0                     | 0.000124968757810547 | 0                    | 0                   | 0                    |
| unclassified(100)  | Otu122112 | 0                     | 0.000124968757810547 | 0                    | 0                   | 0                    |
| unclassified(100)  | Otu122118 | 0                     | 0.000124968757810547 | 0                    | 0                   | 0                    |
| unclassified(100)  | Otu122129 | 0                     | 0.000124968757810547 | 0                    | 0                   | 0                    |
| unclassified(100)  | Otu122160 | 0                     | 0.000124968757810547 | 0                    | 0                   | 0                    |
| unclassified(100)  | Otu122165 | 0                     | 0.000124968757810547 | 0                    | 0                   | 0                    |
| unclassified(100)  | Otu122292 | 0                     | 0.000124968757810547 | 0                    | 0                   | 0                    |
| unclassified(100)  | Otu122319 | 0                     | 0.000124968757810547 | 0                    | 0                   | 0                    |
| unclassified(100)  | Otu122320 | 0                     | 0.000124968757810547 | 0                    | 0                   | 0                    |
| unclassified(100)  | Otu122356 | 0                     | 0.000124968757810547 | 0                    | 0                   | 0                    |
| unclassified(100)  | Otu122361 | 0                     | 0.000124968757810547 | 0                    | 0                   | 0                    |
| unclassified(100)  | Otu122373 | 0                     | 0.000124968757810547 | 0                    | 0                   | 0                    |
| unclassified(100)  | Otu122378 | 0                     | 0.000124968757810547 | 0                    | 0                   | 0                    |
| unclassified(100)  | Otu122385 | 0.0000778513040093422 | 0                    | 0                    | 0                   | 0                    |
| unclassified(100)  | Otu122393 | 0                     | 0.000124968757810547 | 0                    | 0                   | 0                    |

|                    |           |                       |                      |                      |                     |                      |
|--------------------|-----------|-----------------------|----------------------|----------------------|---------------------|----------------------|
| unclassified(100)  | Otu122404 | 0                     | 0.000124968757810547 | 0                    | 0                   | 0                    |
| unclassified(100)  | Otu122407 | 0                     | 0.000124968757810547 | 0                    | 0                   | 0                    |
| unclassified(100)  | Otu122414 | 0                     | 0.000124968757810547 | 0                    | 0                   | 0                    |
| Acinetobacter(100) | Otu123034 | 0                     | 0                    | 0                    | 0.00012482836100362 | 0                    |
| Enhydrobacter(100) | Otu123084 | 0                     | 0                    | 0                    | 0                   | 0.000110387459984546 |
| Psychrobacter(100) | Otu123110 | 0                     | 0                    | 0                    | 0.00012482836100362 | 0                    |
| Enhydrobacter(100) | Otu123258 | 0                     | 0                    | 0                    | 0.00012482836100362 | 0                    |
| Acinetobacter(100) | Otu123267 | 0                     | 0                    | 0.000109075043630017 | 0                   | 0                    |
| Acinetobacter(100) | Otu123388 | 0                     | 0.000124968757810547 | 0                    | 0                   | 0                    |
| Acinetobacter(100) | Otu123434 | 0                     | 0.000124968757810547 | 0                    | 0                   | 0                    |
| Acinetobacter(100) | Otu124132 | 0                     | 0                    | 0.000109075043630017 | 0                   | 0                    |
| Acinetobacter(100) | Otu124176 | 0                     | 0                    | 0                    | 0.00012482836100362 | 0                    |
| Alkanindiges(100)  | Otu124228 | 0                     | 0.000124968757810547 | 0                    | 0                   | 0                    |
| Alkanindiges(100)  | Otu124517 | 0                     | 0                    | 0.000109075043630017 | 0                   | 0                    |
| Acinetobacter(100) | Otu124528 | 0                     | 0                    | 0.000109075043630017 | 0                   | 0                    |
| Acinetobacter(100) | Otu124529 | 0                     | 0.000124968757810547 | 0                    | 0                   | 0                    |
| Acinetobacter(100) | Otu124537 | 0                     | 0                    | 0.000109075043630017 | 0                   | 0                    |
| Acinetobacter(100) | Otu124553 | 0                     | 0.000124968757810547 | 0                    | 0                   | 0                    |
| Acinetobacter(100) | Otu124584 | 0                     | 0                    | 0.000109075043630017 | 0                   | 0                    |
| unclassified(100)  | Otu124601 | 0                     | 0                    | 0                    | 0.00012482836100362 | 0                    |
| Acinetobacter(100) | Otu124648 | 0                     | 0.000124968757810547 | 0                    | 0                   | 0                    |
| Acinetobacter(100) | Otu124687 | 0                     | 0.000124968757810547 | 0                    | 0                   | 0                    |
| Acinetobacter(100) | Otu124754 | 0                     | 0                    | 0                    | 0.00012482836100362 | 0                    |
| Enhydrobacter(100) | Otu124828 | 0                     | 0.000124968757810547 | 0                    | 0                   | 0                    |
| Acinetobacter(100) | Otu124904 | 0                     | 0.000124968757810547 | 0                    | 0                   | 0                    |
| Acinetobacter(100) | Otu124951 | 0                     | 0                    | 0                    | 0.00012482836100362 | 0                    |
| Enhydrobacter(100) | Otu124967 | 0                     | 0                    | 0                    | 0.00012482836100362 | 0                    |
| unclassified(100)  | Otu125021 | 0.0000778513040093422 | 0                    | 0                    | 0                   | 0                    |
| unclassified(100)  | Otu125023 | 0.0000778513040093422 | 0                    | 0                    | 0                   | 0                    |
| unclassified(100)  | Otu125028 | 0                     | 0.000124968757810547 | 0                    | 0                   | 0                    |
| unclassified(100)  | Otu125047 | 0.0000778513040093422 | 0                    | 0                    | 0                   | 0                    |
| unclassified(100)  | Otu125070 | 0                     | 0.000124968757810547 | 0                    | 0                   | 0                    |
| Caulobacter(100)   | Otu125079 | 0.0000778513040093422 | 0                    | 0                    | 0                   | 0                    |

|                       |           |                       |                      |                      |   |   |
|-----------------------|-----------|-----------------------|----------------------|----------------------|---|---|
| unclassified(100)     | Otu125098 | 0.0000778513040093422 | 0                    | 0                    | 0 | 0 |
| Caulobacter(100)      | Otu125109 | 0                     | 0.000124968757810547 | 0                    | 0 | 0 |
| unclassified(100)     | Otu125123 | 0                     | 0.000124968757810547 | 0                    | 0 | 0 |
| unclassified(100)     | Otu125127 | 0.0000778513040093422 | 0                    | 0                    | 0 | 0 |
| Caulobacter(100)      | Otu125128 | 0.0000778513040093422 | 0                    | 0                    | 0 | 0 |
| Caulobacter(100)      | Otu125136 | 0.0000778513040093422 | 0                    | 0                    | 0 | 0 |
| unclassified(100)     | Otu125140 | 0.0000778513040093422 | 0                    | 0                    | 0 | 0 |
| unclassified(100)     | Otu125173 | 0.0000778513040093422 | 0                    | 0                    | 0 | 0 |
| Caulobacter(100)      | Otu125181 | 0.0000778513040093422 | 0                    | 0                    | 0 | 0 |
| Phenylobacterium(100) | Otu125182 | 0.0000778513040093422 | 0                    | 0                    | 0 | 0 |
| unclassified(100)     | Otu125187 | 0.0000778513040093422 | 0                    | 0                    | 0 | 0 |
| unclassified(100)     | Otu125202 | 0.0000778513040093422 | 0                    | 0                    | 0 | 0 |
| unclassified(100)     | Otu125208 | 0.0000778513040093422 | 0                    | 0                    | 0 | 0 |
| Caulobacter(100)      | Otu125228 | 0.0000778513040093422 | 0                    | 0                    | 0 | 0 |
| unclassified(100)     | Otu125230 | 0.0000778513040093422 | 0                    | 0                    | 0 | 0 |
| Caulobacter(100)      | Otu125288 | 0.0000778513040093422 | 0                    | 0                    | 0 | 0 |
| unclassified(100)     | Otu125361 | 0.0000778513040093422 | 0                    | 0                    | 0 | 0 |
| unclassified(100)     | Otu125367 | 0.0000778513040093422 | 0                    | 0                    | 0 | 0 |
| unclassified(100)     | Otu125380 | 0.0000778513040093422 | 0                    | 0                    | 0 | 0 |
| Phenylobacterium(100) | Otu125390 | 0.0000778513040093422 | 0                    | 0                    | 0 | 0 |
| unclassified(100)     | Otu125406 | 0.0000778513040093422 | 0                    | 0                    | 0 | 0 |
| unclassified(100)     | Otu125409 | 0.0000778513040093422 | 0                    | 0                    | 0 | 0 |
| Caulobacter(100)      | Otu125411 | 0.0000778513040093422 | 0                    | 0                    | 0 | 0 |
| unclassified(100)     | Otu125417 | 0.0000778513040093422 | 0                    | 0                    | 0 | 0 |
| unclassified(100)     | Otu125434 | 0.0000778513040093422 | 0                    | 0                    | 0 | 0 |
| unclassified(100)     | Otu125438 | 0.0000778513040093422 | 0                    | 0                    | 0 | 0 |
| Caulobacter(100)      | Otu125443 | 0.0000778513040093422 | 0                    | 0                    | 0 | 0 |
| unclassified(100)     | Otu125480 | 0                     | 0                    | 0.000109075043630017 | 0 | 0 |
| Caulobacter(100)      | Otu125542 | 0.0000778513040093422 | 0                    | 0                    | 0 | 0 |
| unclassified(100)     | Otu125561 | 0.0000778513040093422 | 0                    | 0                    | 0 | 0 |
| Caulobacter(100)      | Otu125563 | 0.0000778513040093422 | 0                    | 0                    | 0 | 0 |
| Caulobacter(100)      | Otu125567 | 0                     | 0.000124968757810547 | 0                    | 0 | 0 |
| unclassified(100)     | Otu125592 | 0                     | 0                    | 0.000109075043630017 | 0 | 0 |

|                    |           |                       |                      |                      |   |                      |
|--------------------|-----------|-----------------------|----------------------|----------------------|---|----------------------|
| Brevundimonas(100) | Otu125594 | 0                     | 0                    | 0.000109075043630017 | 0 | 0                    |
| unclassified(100)  | Otu125649 | 0                     | 0                    | 0.000109075043630017 | 0 | 0                    |
| Caulobacter(100)   | Otu125728 | 0.0000778513040093422 | 0                    | 0                    | 0 | 0                    |
| unclassified(100)  | Otu125736 | 0.0000778513040093422 | 0                    | 0                    | 0 | 0                    |
| Caulobacter(100)   | Otu125742 | 0.0000778513040093422 | 0                    | 0                    | 0 | 0                    |
| unclassified(100)  | Otu125753 | 0                     | 0.000124968757810547 | 0                    | 0 | 0                    |
| unclassified(100)  | Otu125755 | 0.0000778513040093422 | 0                    | 0                    | 0 | 0                    |
| unclassified(100)  | Otu125764 | 0.0000778513040093422 | 0                    | 0                    | 0 | 0                    |
| Caulobacter(100)   | Otu125770 | 0.0000778513040093422 | 0                    | 0                    | 0 | 0                    |
| unclassified(100)  | Otu125782 | 0.0000778513040093422 | 0                    | 0                    | 0 | 0                    |
| unclassified(100)  | Otu125784 | 0.0000778513040093422 | 0                    | 0                    | 0 | 0                    |
| unclassified(100)  | Otu125804 | 0.0000778513040093422 | 0                    | 0                    | 0 | 0                    |
| Caulobacter(100)   | Otu125807 | 0.0000778513040093422 | 0                    | 0                    | 0 | 0                    |
| Brevundimonas(100) | Otu125816 | 0.0000778513040093422 | 0                    | 0                    | 0 | 0                    |
| Caulobacter(100)   | Otu125817 | 0.0000778513040093422 | 0                    | 0                    | 0 | 0                    |
| Brevundimonas(100) | Otu125820 | 0.0000778513040093422 | 0                    | 0                    | 0 | 0                    |
| unclassified(100)  | Otu125822 | 0.0000778513040093422 | 0                    | 0                    | 0 | 0                    |
| Caulobacter(100)   | Otu125824 | 0                     | 0.000124968757810547 | 0                    | 0 | 0                    |
| unclassified(100)  | Otu125840 | 0.0000778513040093422 | 0                    | 0                    | 0 | 0                    |
| Caulobacter(100)   | Otu125843 | 0.0000778513040093422 | 0                    | 0                    | 0 | 0                    |
| unclassified(100)  | Otu125849 | 0.0000778513040093422 | 0                    | 0                    | 0 | 0                    |
| unclassified(100)  | Otu125851 | 0.0000778513040093422 | 0                    | 0                    | 0 | 0                    |
| unclassified(100)  | Otu125856 | 0.0000778513040093422 | 0                    | 0                    | 0 | 0                    |
| Caulobacter(100)   | Otu125876 | 0.0000778513040093422 | 0                    | 0                    | 0 | 0                    |
| Caulobacter(100)   | Otu125882 | 0.0000778513040093422 | 0                    | 0                    | 0 | 0                    |
| unclassified(100)  | Otu125885 | 0.0000778513040093422 | 0                    | 0                    | 0 | 0                    |
| Caulobacter(100)   | Otu125886 | 0                     | 0                    | 0                    | 0 | 0.000110387459984546 |
| Caulobacter(100)   | Otu125888 | 0.0000778513040093422 | 0                    | 0                    | 0 | 0                    |
| unclassified(100)  | Otu125894 | 0.0000778513040093422 | 0                    | 0                    | 0 | 0                    |
| unclassified(100)  | Otu125937 | 0.0000778513040093422 | 0                    | 0                    | 0 | 0                    |
| Caulobacter(100)   | Otu125943 | 0.0000778513040093422 | 0                    | 0                    | 0 | 0                    |
| Caulobacter(100)   | Otu125963 | 0.0000778513040093422 | 0                    | 0                    | 0 | 0                    |
| unclassified(100)  | Otu125968 | 0.0000778513040093422 | 0                    | 0                    | 0 | 0                    |



|                   |           |                       |   |   |   |   |
|-------------------|-----------|-----------------------|---|---|---|---|
| unclassified(100) | Otu125972 | 0.0000778513040093422 | 0 | 0 | 0 | 0 |
| unclassified(100) | Otu125978 | 0.0000778513040093422 | 0 | 0 | 0 | 0 |
| unclassified(100) | Otu125980 | 0.0000778513040093422 | 0 | 0 | 0 | 0 |
| unclassified(100) | Otu125982 | 0.0000778513040093422 | 0 | 0 | 0 | 0 |
| unclassified(100) | Otu125994 | 0.0000778513040093422 | 0 | 0 | 0 | 0 |
| unclassified(100) | Otu125996 | 0.0000778513040093422 | 0 | 0 | 0 | 0 |
| unclassified(100) | Otu125997 | 0.0000778513040093422 | 0 | 0 | 0 | 0 |
| unclassified(100) | Otu125999 | 0.0000778513040093422 | 0 | 0 | 0 | 0 |
| unclassified(100) | Otu126003 | 0.0000778513040093422 | 0 | 0 | 0 | 0 |
| unclassified(100) | Otu126004 | 0.0000778513040093422 | 0 | 0 | 0 | 0 |
| unclassified(100) | Otu126006 | 0.0000778513040093422 | 0 | 0 | 0 | 0 |
| unclassified(100) | Otu126007 | 0.0000778513040093422 | 0 | 0 | 0 | 0 |
| unclassified(100) | Otu126011 | 0.0000778513040093422 | 0 | 0 | 0 | 0 |
| unclassified(100) | Otu126020 | 0.0000778513040093422 | 0 | 0 | 0 | 0 |
| unclassified(100) | Otu126021 | 0.0000778513040093422 | 0 | 0 | 0 | 0 |
| unclassified(100) | Otu126026 | 0.0000778513040093422 | 0 | 0 | 0 | 0 |
| unclassified(100) | Otu126027 | 0.0000778513040093422 | 0 | 0 | 0 | 0 |
| unclassified(100) | Otu126030 | 0.0000778513040093422 | 0 | 0 | 0 | 0 |
| unclassified(100) | Otu126034 | 0.0000778513040093422 | 0 | 0 | 0 | 0 |
| unclassified(100) | Otu126038 | 0.0000778513040093422 | 0 | 0 | 0 | 0 |
| unclassified(100) | Otu126066 | 0.0000778513040093422 | 0 | 0 | 0 | 0 |
| unclassified(100) | Otu126069 | 0.0000778513040093422 | 0 | 0 | 0 | 0 |
| unclassified(100) | Otu126075 | 0.0000778513040093422 | 0 | 0 | 0 | 0 |
| unclassified(100) | Otu126080 | 0.0000778513040093422 | 0 | 0 | 0 | 0 |
| unclassified(100) | Otu126128 | 0.0000778513040093422 | 0 | 0 | 0 | 0 |
| unclassified(100) | Otu126156 | 0.0000778513040093422 | 0 | 0 | 0 | 0 |
| unclassified(100) | Otu126169 | 0.0000778513040093422 | 0 | 0 | 0 | 0 |
| unclassified(100) | Otu126172 | 0.0000778513040093422 | 0 | 0 | 0 | 0 |
| unclassified(100) | Otu126176 | 0.0000778513040093422 | 0 | 0 | 0 | 0 |
| unclassified(100) | Otu126180 | 0.0000778513040093422 | 0 | 0 | 0 | 0 |
| unclassified(100) | Otu126183 | 0.0000778513040093422 | 0 | 0 | 0 | 0 |
| unclassified(100) | Otu126184 | 0.0000778513040093422 | 0 | 0 | 0 | 0 |
| unclassified(100) | Otu126446 | 0.0000778513040093422 | 0 | 0 | 0 | 0 |

|                     |           |                       |                      |                      |                     |                      |
|---------------------|-----------|-----------------------|----------------------|----------------------|---------------------|----------------------|
| unclassified(100)   | Otu126523 | 0                     | 0                    | 0                    | 0                   | 0.000110387459984546 |
| unclassified(100)   | Otu126524 | 0                     | 0                    | 0                    | 0                   | 0.000110387459984546 |
| unclassified(100)   | Otu126529 | 0                     | 0                    | 0                    | 0                   | 0.000110387459984546 |
| unclassified(100)   | Otu126532 | 0                     | 0                    | 0                    | 0                   | 0.000110387459984546 |
| unclassified(100)   | Otu126546 | 0                     | 0                    | 0                    | 0                   | 0.000110387459984546 |
| unclassified(100)   | Otu126715 | 0                     | 0                    | 0                    | 0                   | 0.000110387459984546 |
| unclassified(100)   | Otu126717 | 0                     | 0                    | 0                    | 0                   | 0.000110387459984546 |
| unclassified(100)   | Otu126719 | 0                     | 0                    | 0                    | 0                   | 0.000110387459984546 |
| unclassified(100)   | Otu126793 | 0.0000778513040093422 | 0                    | 0                    | 0                   | 0                    |
| unclassified(100)   | Otu126851 | 0                     | 0                    | 0                    | 0                   | 0.000110387459984546 |
| Rhizobium(100)      | Otu126973 | 0                     | 0                    | 0                    | 0                   | 0.000110387459984546 |
| Rhizobium(100)      | Otu126978 | 0.0000778513040093422 | 0                    | 0                    | 0                   | 0                    |
| Rhizobium(100)      | Otu126980 | 0.0000778513040093422 | 0                    | 0                    | 0                   | 0                    |
| Rhizobium(100)      | Otu126996 | 0                     | 0                    | 0                    | 0                   | 0.000110387459984546 |
| Rhizobium(100)      | Otu127001 | 0                     | 0                    | 0                    | 0                   | 0.000110387459984546 |
| Rhizobium(100)      | Otu127046 | 0.0000778513040093422 | 0                    | 0                    | 0                   | 0                    |
| Rhizobium(100)      | Otu127267 | 0                     | 0                    | 0                    | 0.00012482836100362 | 0                    |
| Rhizobium(100)      | Otu127277 | 0                     | 0                    | 0.000109075043630017 | 0                   | 0                    |
| Rhizobium(100)      | Otu127280 | 0                     | 0                    | 0.000109075043630017 | 0                   | 0                    |
| Rhizobium(100)      | Otu127288 | 0                     | 0                    | 0                    | 0.00012482836100362 | 0                    |
| Rhizobium(100)      | Otu127340 | 0                     | 0                    | 0                    | 0                   | 0.000110387459984546 |
| Rhizobium(100)      | Otu127342 | 0                     | 0                    | 0                    | 0.00012482836100362 | 0                    |
| Rhizobium(100)      | Otu127434 | 0                     | 0                    | 0                    | 0                   | 0.000110387459984546 |
| Rhizobium(100)      | Otu127438 | 0                     | 0                    | 0                    | 0                   | 0.000110387459984546 |
| unclassified(100)   | Otu127453 | 0                     | 0                    | 0                    | 0                   | 0.000220774919969092 |
| Flectobacillus(100) | Otu127459 | 0                     | 0                    | 0.000109075043630017 | 0                   | 0                    |
| Hymenobacter(100)   | Otu127463 | 0                     | 0.000124968757810547 | 0                    | 0                   | 0                    |
| Hymenobacter(100)   | Otu127465 | 0                     | 0                    | 0                    | 0                   | 0.000110387459984546 |
| Hymenobacter(100)   | Otu127467 | 0                     | 0                    | 0                    | 0                   | 0.000110387459984546 |
| Hymenobacter(100)   | Otu127469 | 0                     | 0.000124968757810547 | 0                    | 0                   | 0                    |
| Hymenobacter(100)   | Otu127471 | 0                     | 0                    | 0                    | 0                   | 0.000110387459984546 |
| Hymenobacter(100)   | Otu127517 | 0                     | 0                    | 0                    | 0.00012482836100362 | 0                    |
| Flexibacter(100)    | Otu127525 | 0                     | 0                    | 0                    | 0.00012482836100362 | 0                    |

|                       |           |                       |                      |                      |                     |                      |
|-----------------------|-----------|-----------------------|----------------------|----------------------|---------------------|----------------------|
| Hymenobacter(100)     | Otu127527 | 0                     | 0                    | 0                    | 0.00012482836100362 | 0                    |
| Hymenobacter(100)     | Otu127529 | 0                     | 0                    | 0                    | 0                   | 0.000110387459984546 |
| Spirosoma(100)        | Otu127535 | 0.0000778513040093422 | 0                    | 0                    | 0                   | 0                    |
| unclassified(100)     | Otu127543 | 0.0000778513040093422 | 0                    | 0                    | 0                   | 0                    |
| Spirosoma(100)        | Otu127545 | 0.0000778513040093422 | 0                    | 0                    | 0                   | 0                    |
| Spirosoma(100)        | Otu127553 | 0.0000778513040093422 | 0                    | 0                    | 0                   | 0                    |
| Spirosoma(100)        | Otu127554 | 0.0000778513040093422 | 0                    | 0                    | 0                   | 0                    |
| Hymenobacter(100)     | Otu127558 | 0                     | 0.000124968757810547 | 0                    | 0                   | 0                    |
| Hymenobacter(100)     | Otu127560 | 0                     | 0.000124968757810547 | 0                    | 0                   | 0                    |
| Hymenobacter(100)     | Otu127564 | 0                     | 0.000124968757810547 | 0                    | 0                   | 0                    |
| unclassified(100)     | Otu127636 | 0                     | 0                    | 0                    | 0                   | 0.000220774919969092 |
| Hymenobacter(100)     | Otu127637 | 0                     | 0                    | 0                    | 0                   | 0.000110387459984546 |
| Hymenobacter(100)     | Otu127644 | 0                     | 0.000124968757810547 | 0                    | 0                   | 0                    |
| Hymenobacter(100)     | Otu127842 | 0                     | 0                    | 0                    | 0.00012482836100362 | 0                    |
| Hymenobacter(100)     | Otu127843 | 0                     | 0                    | 0.000109075043630017 | 0                   | 0                    |
| Caulobacter(100)      | Otu127945 | 0                     | 0                    | 0                    | 0.00012482836100362 | 0                    |
| unclassified(100)     | Otu128032 | 0.0000778513040093422 | 0                    | 0                    | 0                   | 0                    |
| Caulobacter(100)      | Otu128034 | 0                     | 0                    | 0.000109075043630017 | 0                   | 0                    |
| Brevundimonas(100)    | Otu128038 | 0                     | 0                    | 0                    | 0.00012482836100362 | 0                    |
| unclassified(100)     | Otu128201 | 0                     | 0                    | 0.000109075043630017 | 0                   | 0                    |
| Caulobacter(100)      | Otu128211 | 0                     | 0                    | 0.000109075043630017 | 0                   | 0                    |
| Phenylobacterium(100) | Otu128245 | 0                     | 0                    | 0.000109075043630017 | 0                   | 0                    |
| Phenylobacterium(100) | Otu128290 | 0                     | 0                    | 0.000109075043630017 | 0                   | 0                    |
| Brevundimonas(100)    | Otu128353 | 0                     | 0                    | 0                    | 0                   | 0.000110387459984546 |
| Brevundimonas(100)    | Otu128380 | 0                     | 0                    | 0                    | 0.00012482836100362 | 0                    |
| unclassified(100)     | Otu128410 | 0                     | 0                    | 0                    | 0                   | 0.000110387459984546 |
| unclassified(100)     | Otu128411 | 0                     | 0                    | 0                    | 0                   | 0.000110387459984546 |
| Rhizobium(100)        | Otu128551 | 0                     | 0.000124968757810547 | 0                    | 0                   | 0                    |
| Rhizobium(100)        | Otu128657 | 0.0000778513040093422 | 0                    | 0                    | 0                   | 0                    |
| Rhizobium(100)        | Otu128659 | 0.0000778513040093422 | 0                    | 0                    | 0                   | 0                    |
| unclassified(100)     | Otu128898 | 0                     | 0                    | 0                    | 0.00012482836100362 | 0                    |
| unclassified(100)     | Otu128918 | 0.0000778513040093422 | 0                    | 0                    | 0                   | 0                    |
| unclassified(100)     | Otu129039 | 0.0000778513040093422 | 0                    | 0                    | 0                   | 0                    |

|                   |           |                       |                      |   |   |                      |
|-------------------|-----------|-----------------------|----------------------|---|---|----------------------|
| unclassified(100) | Otu129041 | 0.0000778513040093422 | 0                    | 0 | 0 | 0                    |
| unclassified(100) | Otu129050 | 0.0000778513040093422 | 0                    | 0 | 0 | 0                    |
| unclassified(100) | Otu129051 | 0.0000778513040093422 | 0                    | 0 | 0 | 0                    |
| unclassified(100) | Otu129061 | 0.0000778513040093422 | 0                    | 0 | 0 | 0                    |
| unclassified(100) | Otu129063 | 0.0000778513040093422 | 0                    | 0 | 0 | 0                    |
| unclassified(100) | Otu129064 | 0.0000778513040093422 | 0                    | 0 | 0 | 0                    |
| unclassified(100) | Otu129065 | 0.0000778513040093422 | 0                    | 0 | 0 | 0                    |
| unclassified(100) | Otu129066 | 0.0000778513040093422 | 0                    | 0 | 0 | 0                    |
| unclassified(100) | Otu129079 | 0.0000778513040093422 | 0                    | 0 | 0 | 0                    |
| unclassified(100) | Otu129081 | 0.0000778513040093422 | 0                    | 0 | 0 | 0                    |
| unclassified(100) | Otu129083 | 0.0000778513040093422 | 0                    | 0 | 0 | 0                    |
| unclassified(100) | Otu129091 | 0.0000778513040093422 | 0                    | 0 | 0 | 0                    |
| unclassified(100) | Otu129093 | 0.0000778513040093422 | 0                    | 0 | 0 | 0                    |
| unclassified(100) | Otu129132 | 0.0000778513040093422 | 0                    | 0 | 0 | 0                    |
| unclassified(100) | Otu129676 | 0.0000778513040093422 | 0                    | 0 | 0 | 0                    |
| unclassified(100) | Otu129677 | 0.0000778513040093422 | 0                    | 0 | 0 | 0                    |
| unclassified(100) | Otu129713 | 0.0000778513040093422 | 0                    | 0 | 0 | 0                    |
| unclassified(100) | Otu129716 | 0.0000778513040093422 | 0                    | 0 | 0 | 0                    |
| unclassified(100) | Otu129717 | 0.0000778513040093422 | 0                    | 0 | 0 | 0                    |
| unclassified(100) | Otu129723 | 0.0000778513040093422 | 0                    | 0 | 0 | 0                    |
| unclassified(100) | Otu129726 | 0.0000778513040093422 | 0                    | 0 | 0 | 0                    |
| unclassified(100) | Otu129728 | 0.0000778513040093422 | 0                    | 0 | 0 | 0                    |
| unclassified(100) | Otu129733 | 0.0000778513040093422 | 0                    | 0 | 0 | 0                    |
| unclassified(100) | Otu129735 | 0.0000778513040093422 | 0                    | 0 | 0 | 0                    |
| unclassified(100) | Otu129744 | 0.0000778513040093422 | 0                    | 0 | 0 | 0                    |
| unclassified(100) | Otu129752 | 0.0000778513040093422 | 0                    | 0 | 0 | 0                    |
| unclassified(100) | Otu129756 | 0.0000778513040093422 | 0                    | 0 | 0 | 0                    |
| unclassified(100) | Otu129767 | 0.0000778513040093422 | 0                    | 0 | 0 | 0                    |
| unclassified(100) | Otu130919 | 0                     | 0                    | 0 | 0 | 0.000110387459984546 |
| unclassified(100) | Otu131121 | 0.0000778513040093422 | 0                    | 0 | 0 | 0                    |
| unclassified(100) | Otu131125 | 0.0000778513040093422 | 0                    | 0 | 0 | 0                    |
| unclassified(100) | Otu131134 | 0                     | 0.000124968757810547 | 0 | 0 | 0                    |
| unclassified(100) | Otu131135 | 0.0000778513040093422 | 0                    | 0 | 0 | 0                    |

|                   |           |                       |                      |                      |   |   |
|-------------------|-----------|-----------------------|----------------------|----------------------|---|---|
| unclassified(100) | Otu131139 | 0.0000778513040093422 | 0                    | 0                    | 0 | 0 |
| unclassified(100) | Otu131146 | 0                     | 0.000124968757810547 | 0                    | 0 | 0 |
| unclassified(100) | Otu131164 | 0                     | 0.000124968757810547 | 0                    | 0 | 0 |
| unclassified(100) | Otu131165 | 0                     | 0.000124968757810547 | 0                    | 0 | 0 |
| unclassified(100) | Otu131171 | 0                     | 0.000124968757810547 | 0                    | 0 | 0 |
| unclassified(100) | Otu131174 | 0                     | 0.000124968757810547 | 0                    | 0 | 0 |
| unclassified(100) | Otu131178 | 0                     | 0.000124968757810547 | 0                    | 0 | 0 |
| unclassified(100) | Otu131181 | 0                     | 0.000124968757810547 | 0                    | 0 | 0 |
| unclassified(100) | Otu131183 | 0                     | 0.000124968757810547 | 0                    | 0 | 0 |
| unclassified(100) | Otu131194 | 0                     | 0.000124968757810547 | 0                    | 0 | 0 |
| unclassified(100) | Otu131200 | 0                     | 0.000124968757810547 | 0                    | 0 | 0 |
| unclassified(100) | Otu131209 | 0                     | 0                    | 0.000109075043630017 | 0 | 0 |
| unclassified(100) | Otu131210 | 0                     | 0.000124968757810547 | 0                    | 0 | 0 |
| unclassified(100) | Otu131211 | 0                     | 0.000124968757810547 | 0                    | 0 | 0 |
| unclassified(100) | Otu131213 | 0                     | 0.000124968757810547 | 0                    | 0 | 0 |
| unclassified(100) | Otu131215 | 0                     | 0.000124968757810547 | 0                    | 0 | 0 |
| unclassified(100) | Otu131223 | 0                     | 0.000124968757810547 | 0                    | 0 | 0 |
| unclassified(100) | Otu131232 | 0                     | 0.000124968757810547 | 0                    | 0 | 0 |
| unclassified(100) | Otu131233 | 0                     | 0.000124968757810547 | 0                    | 0 | 0 |
| unclassified(100) | Otu131237 | 0                     | 0.000124968757810547 | 0                    | 0 | 0 |
| unclassified(100) | Otu131239 | 0                     | 0.000124968757810547 | 0                    | 0 | 0 |
| unclassified(100) | Otu131241 | 0                     | 0.000124968757810547 | 0                    | 0 | 0 |
| unclassified(100) | Otu131271 | 0.0000778513040093422 | 0                    | 0                    | 0 | 0 |
| unclassified(100) | Otu131290 | 0.0000778513040093422 | 0                    | 0                    | 0 | 0 |
| unclassified(100) | Otu131305 | 0                     | 0                    | 0.000109075043630017 | 0 | 0 |
| unclassified(100) | Otu131312 | 0.0000778513040093422 | 0                    | 0                    | 0 | 0 |
| unclassified(100) | Otu131315 | 0.0000778513040093422 | 0                    | 0                    | 0 | 0 |
| unclassified(100) | Otu131316 | 0                     | 0.000999750062484379 | 0                    | 0 | 0 |
| unclassified(100) | Otu131320 | 0                     | 0                    | 0.000109075043630017 | 0 | 0 |
| unclassified(100) | Otu131324 | 0.0000778513040093422 | 0                    | 0                    | 0 | 0 |
| unclassified(100) | Otu131325 | 0.0000778513040093422 | 0                    | 0                    | 0 | 0 |
| unclassified(100) | Otu131327 | 0.0000778513040093422 | 0                    | 0                    | 0 | 0 |
| unclassified(100) | Otu131331 | 0                     | 0.000124968757810547 | 0                    | 0 | 0 |

|                   |           |                       |                      |                      |   |                      |
|-------------------|-----------|-----------------------|----------------------|----------------------|---|----------------------|
| unclassified(100) | Otu131333 | 0                     | 0.000124968757810547 | 0                    | 0 | 0                    |
| unclassified(100) | Otu131336 | 0.0000778513040093422 | 0                    | 0                    | 0 | 0                    |
| unclassified(100) | Otu131339 | 0.0000778513040093422 | 0                    | 0                    | 0 | 0                    |
| unclassified(100) | Otu131341 | 0.0000778513040093422 | 0                    | 0                    | 0 | 0                    |
| unclassified(100) | Otu131343 | 0                     | 0.000124968757810547 | 0                    | 0 | 0                    |
| unclassified(100) | Otu131353 | 0.0000778513040093422 | 0                    | 0                    | 0 | 0                    |
| unclassified(100) | Otu131355 | 0.0000778513040093422 | 0                    | 0                    | 0 | 0                    |
| unclassified(100) | Otu131369 | 0                     | 0                    | 0                    | 0 | 0.000110387459984546 |
| unclassified(100) | Otu131370 | 0                     | 0                    | 0                    | 0 | 0.000110387459984546 |
| unclassified(100) | Otu131372 | 0                     | 0                    | 0                    | 0 | 0.000110387459984546 |
| unclassified(100) | Otu131375 | 0                     | 0                    | 0                    | 0 | 0.000110387459984546 |
| unclassified(100) | Otu131380 | 0                     | 0.000124968757810547 | 0                    | 0 | 0                    |
| unclassified(100) | Otu131383 | 0                     | 0.000124968757810547 | 0                    | 0 | 0                    |
| unclassified(100) | Otu131385 | 0                     | 0.000124968757810547 | 0                    | 0 | 0                    |
| unclassified(100) | Otu131387 | 0                     | 0.000124968757810547 | 0                    | 0 | 0                    |
| unclassified(100) | Otu131396 | 0                     | 0                    | 0                    | 0 | 0.000110387459984546 |
| unclassified(100) | Otu131398 | 0                     | 0                    | 0.000109075043630017 | 0 | 0                    |
| unclassified(100) | Otu131403 | 0                     | 0                    | 0.000109075043630017 | 0 | 0                    |
| unclassified(100) | Otu131404 | 0                     | 0                    | 0                    | 0 | 0.000110387459984546 |
| unclassified(100) | Otu131405 | 0                     | 0                    | 0                    | 0 | 0.000110387459984546 |
| unclassified(100) | Otu131409 | 0                     | 0                    | 0                    | 0 | 0.000110387459984546 |
| unclassified(100) | Otu131411 | 0                     | 0                    | 0                    | 0 | 0.000110387459984546 |
| unclassified(100) | Otu131412 | 0                     | 0                    | 0                    | 0 | 0.000110387459984546 |
| unclassified(100) | Otu131413 | 0                     | 0                    | 0                    | 0 | 0.000110387459984546 |
| unclassified(100) | Otu131414 | 0                     | 0                    | 0                    | 0 | 0.000110387459984546 |
| unclassified(100) | Otu131418 | 0                     | 0                    | 0                    | 0 | 0.000110387459984546 |
| unclassified(100) | Otu131421 | 0                     | 0                    | 0                    | 0 | 0.000110387459984546 |
| unclassified(100) | Otu131423 | 0                     | 0                    | 0                    | 0 | 0.000110387459984546 |
| unclassified(100) | Otu131424 | 0                     | 0                    | 0                    | 0 | 0.000110387459984546 |
| unclassified(100) | Otu131426 | 0                     | 0                    | 0                    | 0 | 0.000110387459984546 |
| unclassified(100) | Otu131428 | 0                     | 0                    | 0                    | 0 | 0.000110387459984546 |
| unclassified(100) | Otu131429 | 0                     | 0                    | 0                    | 0 | 0.000110387459984546 |
| unclassified(100) | Otu131430 | 0                     | 0                    | 0                    | 0 | 0.000110387459984546 |

|                   |           |   |   |                      |                     |                      |
|-------------------|-----------|---|---|----------------------|---------------------|----------------------|
| unclassified(100) | Otu131431 | 0 | 0 | 0                    | 0                   | 0.000110387459984546 |
| unclassified(100) | Otu131435 | 0 | 0 | 0                    | 0                   | 0.000110387459984546 |
| unclassified(100) | Otu131436 | 0 | 0 | 0                    | 0                   | 0.000110387459984546 |
| unclassified(100) | Otu131439 | 0 | 0 | 0                    | 0                   | 0.000110387459984546 |
| unclassified(100) | Otu131441 | 0 | 0 | 0                    | 0                   | 0.000110387459984546 |
| unclassified(100) | Otu131443 | 0 | 0 | 0                    | 0                   | 0.000110387459984546 |
| unclassified(100) | Otu131446 | 0 | 0 | 0                    | 0                   | 0.000110387459984546 |
| unclassified(100) | Otu131451 | 0 | 0 | 0                    | 0                   | 0.000110387459984546 |
| unclassified(100) | Otu131452 | 0 | 0 | 0                    | 0                   | 0.000110387459984546 |
| unclassified(100) | Otu131456 | 0 | 0 | 0                    | 0                   | 0.000110387459984546 |
| unclassified(100) | Otu131463 | 0 | 0 | 0                    | 0                   | 0.000110387459984546 |
| unclassified(100) | Otu131465 | 0 | 0 | 0.000109075043630017 | 0                   | 0                    |
| unclassified(100) | Otu131467 | 0 | 0 | 0                    | 0                   | 0.000110387459984546 |
| unclassified(100) | Otu131473 | 0 | 0 | 0                    | 0                   | 0.000110387459984546 |
| unclassified(100) | Otu131478 | 0 | 0 | 0                    | 0                   | 0.000110387459984546 |
| unclassified(100) | Otu131483 | 0 | 0 | 0                    | 0                   | 0.000110387459984546 |
| unclassified(100) | Otu131485 | 0 | 0 | 0                    | 0                   | 0.000110387459984546 |
| unclassified(100) | Otu131489 | 0 | 0 | 0                    | 0                   | 0.000110387459984546 |
| unclassified(100) | Otu131490 | 0 | 0 | 0                    | 0                   | 0.000110387459984546 |
| unclassified(100) | Otu131497 | 0 | 0 | 0                    | 0                   | 0.000110387459984546 |
| unclassified(100) | Otu131507 | 0 | 0 | 0                    | 0                   | 0.000110387459984546 |
| unclassified(100) | Otu131511 | 0 | 0 | 0                    | 0                   | 0.000110387459984546 |
| unclassified(100) | Otu131512 | 0 | 0 | 0                    | 0                   | 0.000110387459984546 |
| unclassified(100) | Otu131513 | 0 | 0 | 0                    | 0                   | 0.000110387459984546 |
| unclassified(100) | Otu131518 | 0 | 0 | 0                    | 0                   | 0.000110387459984546 |
| unclassified(100) | Otu131525 | 0 | 0 | 0                    | 0.00012482836100362 | 0                    |
| unclassified(100) | Otu131529 | 0 | 0 | 0                    | 0.00012482836100362 | 0                    |
| unclassified(100) | Otu131533 | 0 | 0 | 0                    | 0.00012482836100362 | 0                    |
| unclassified(100) | Otu131535 | 0 | 0 | 0                    | 0                   | 0.000110387459984546 |
| unclassified(100) | Otu131537 | 0 | 0 | 0                    | 0.00012482836100362 | 0                    |
| unclassified(100) | Otu131548 | 0 | 0 | 0                    | 0.00012482836100362 | 0                    |
| unclassified(100) | Otu131550 | 0 | 0 | 0.000109075043630017 | 0                   | 0                    |
| unclassified(100) | Otu131555 | 0 | 0 | 0.000109075043630017 | 0                   | 0                    |

|                   |           |   |   |                      |                     |                      |
|-------------------|-----------|---|---|----------------------|---------------------|----------------------|
| unclassified(100) | Otu131557 | 0 | 0 | 0.000109075043630017 | 0                   | 0                    |
| unclassified(100) | Otu131558 | 0 | 0 | 0.000109075043630017 | 0                   | 0                    |
| unclassified(100) | Otu131561 | 0 | 0 | 0.000109075043630017 | 0                   | 0                    |
| unclassified(100) | Otu131566 | 0 | 0 | 0                    | 0.00012482836100362 | 0                    |
| unclassified(100) | Otu131568 | 0 | 0 | 0.000109075043630017 | 0                   | 0                    |
| unclassified(100) | Otu131571 | 0 | 0 | 0.000109075043630017 | 0                   | 0                    |
| unclassified(100) | Otu131572 | 0 | 0 | 0                    | 0                   | 0.000110387459984546 |
| unclassified(100) | Otu131573 | 0 | 0 | 0.000109075043630017 | 0                   | 0                    |
| unclassified(100) | Otu131579 | 0 | 0 | 0                    | 0.00012482836100362 | 0                    |
| unclassified(100) | Otu131581 | 0 | 0 | 0.000109075043630017 | 0                   | 0                    |
| unclassified(100) | Otu131585 | 0 | 0 | 0                    | 0.00012482836100362 | 0                    |
| unclassified(100) | Otu131586 | 0 | 0 | 0                    | 0.00012482836100362 | 0                    |
| unclassified(100) | Otu131587 | 0 | 0 | 0                    | 0.00012482836100362 | 0                    |
| unclassified(100) | Otu131593 | 0 | 0 | 0                    | 0.00012482836100362 | 0                    |
| unclassified(100) | Otu131594 | 0 | 0 | 0                    | 0.00012482836100362 | 0                    |
| unclassified(100) | Otu131597 | 0 | 0 | 0.000109075043630017 | 0                   | 0                    |
| unclassified(100) | Otu131604 | 0 | 0 | 0                    | 0.00012482836100362 | 0                    |
| unclassified(100) | Otu131606 | 0 | 0 | 0                    | 0                   | 0.000110387459984546 |
| unclassified(100) | Otu131607 | 0 | 0 | 0                    | 0                   | 0.000110387459984546 |
| unclassified(100) | Otu131608 | 0 | 0 | 0                    | 0                   | 0.000110387459984546 |
| unclassified(100) | Otu131609 | 0 | 0 | 0                    | 0                   | 0.000110387459984546 |
| unclassified(100) | Otu131610 | 0 | 0 | 0                    | 0                   | 0.000110387459984546 |
| unclassified(100) | Otu131616 | 0 | 0 | 0                    | 0.00012482836100362 | 0                    |
| unclassified(100) | Otu131624 | 0 | 0 | 0                    | 0.00012482836100362 | 0                    |
| unclassified(100) | Otu131670 | 0 | 0 | 0                    | 0.00012482836100362 | 0                    |
| unclassified(100) | Otu131704 | 0 | 0 | 0                    | 0.00012482836100362 | 0                    |
| unclassified(100) | Otu131708 | 0 | 0 | 0                    | 0.00012482836100362 | 0                    |
| unclassified(100) | Otu131714 | 0 | 0 | 0                    | 0.00012482836100362 | 0                    |
| unclassified(100) | Otu131717 | 0 | 0 | 0                    | 0.00012482836100362 | 0                    |
| unclassified(100) | Otu131718 | 0 | 0 | 0                    | 0.00012482836100362 | 0                    |
| unclassified(100) | Otu131726 | 0 | 0 | 0                    | 0.00012482836100362 | 0                    |
| unclassified(100) | Otu131732 | 0 | 0 | 0                    | 0.00012482836100362 | 0                    |
| unclassified(100) | Otu131772 | 0 | 0 | 0                    | 0                   | 0.000110387459984546 |



|                   |           |   |                      |                      |   |   |
|-------------------|-----------|---|----------------------|----------------------|---|---|
| unclassified(100) | Otu132470 | 0 | 0                    | 0.000109075043630017 | 0 | 0 |
| unclassified(100) | Otu132471 | 0 | 0                    | 0.000109075043630017 | 0 | 0 |
| unclassified(100) | Otu132476 | 0 | 0                    | 0.000109075043630017 | 0 | 0 |
| unclassified(100) | Otu132477 | 0 | 0                    | 0.000109075043630017 | 0 | 0 |
| unclassified(100) | Otu132480 | 0 | 0                    | 0.000109075043630017 | 0 | 0 |
| unclassified(100) | Otu132482 | 0 | 0                    | 0.000109075043630017 | 0 | 0 |
| unclassified(100) | Otu132483 | 0 | 0                    | 0.000109075043630017 | 0 | 0 |
| unclassified(100) | Otu132484 | 0 | 0                    | 0.000109075043630017 | 0 | 0 |
| unclassified(100) | Otu132488 | 0 | 0                    | 0.000109075043630017 | 0 | 0 |
| unclassified(100) | Otu132491 | 0 | 0                    | 0.000109075043630017 | 0 | 0 |
| unclassified(100) | Otu132494 | 0 | 0                    | 0.000109075043630017 | 0 | 0 |
| unclassified(100) | Otu132497 | 0 | 0                    | 0.000109075043630017 | 0 | 0 |
| unclassified(100) | Otu132498 | 0 | 0                    | 0.000109075043630017 | 0 | 0 |
| unclassified(100) | Otu132499 | 0 | 0                    | 0.000109075043630017 | 0 | 0 |
| unclassified(100) | Otu132502 | 0 | 0.000124968757810547 | 0                    | 0 | 0 |
| unclassified(100) | Otu132505 | 0 | 0.000124968757810547 | 0                    | 0 | 0 |
| unclassified(100) | Otu132508 | 0 | 0.000124968757810547 | 0                    | 0 | 0 |
| unclassified(100) | Otu132510 | 0 | 0.000249937515621095 | 0                    | 0 | 0 |
| unclassified(100) | Otu132512 | 0 | 0                    | 0.000109075043630017 | 0 | 0 |
| unclassified(100) | Otu132514 | 0 | 0                    | 0.000109075043630017 | 0 | 0 |
| unclassified(100) | Otu132515 | 0 | 0                    | 0.000109075043630017 | 0 | 0 |
| unclassified(100) | Otu132517 | 0 | 0                    | 0.000109075043630017 | 0 | 0 |
| unclassified(100) | Otu132518 | 0 | 0                    | 0.000109075043630017 | 0 | 0 |
| unclassified(100) | Otu132523 | 0 | 0                    | 0.000109075043630017 | 0 | 0 |
| unclassified(100) | Otu132525 | 0 | 0                    | 0.000109075043630017 | 0 | 0 |
| unclassified(100) | Otu132529 | 0 | 0                    | 0.000109075043630017 | 0 | 0 |
| unclassified(100) | Otu132566 | 0 | 0                    | 0.000109075043630017 | 0 | 0 |
| unclassified(100) | Otu132570 | 0 | 0                    | 0.000109075043630017 | 0 | 0 |
| unclassified(100) | Otu132571 | 0 | 0                    | 0.000109075043630017 | 0 | 0 |
| unclassified(100) | Otu132573 | 0 | 0                    | 0.000109075043630017 | 0 | 0 |
| unclassified(100) | Otu166928 | 0 | 0.000124968757810547 | 0                    | 0 | 0 |
| unclassified(100) | Otu167036 | 0 | 0.000124968757810547 | 0                    | 0 | 0 |
| unclassified(100) | Otu167722 | 0 | 0                    | 0.000109075043630017 | 0 | 0 |

|                       |           |                       |                      |                      |                     |                      |
|-----------------------|-----------|-----------------------|----------------------|----------------------|---------------------|----------------------|
| unclassified(100)     | Otu168364 | 0                     | 0                    | 0                    | 0.00012482836100362 | 0                    |
| unclassified(100)     | Otu168446 | 0                     | 0                    | 0                    | 0.00012482836100362 | 0                    |
| Stenotrophomonas(100) | Otu168449 | 0                     | 0                    | 0                    | 0.00012482836100362 | 0                    |
| Stenotrophomonas(100) | Otu168457 | 0                     | 0                    | 0                    | 0.00012482836100362 | 0                    |
| unclassified(100)     | Otu168460 | 0                     | 0                    | 0                    | 0.00012482836100362 | 0                    |
| unclassified(100)     | Otu168473 | 0                     | 0                    | 0                    | 0.00012482836100362 | 0                    |
| unclassified(100)     | Otu168476 | 0                     | 0                    | 0                    | 0.00012482836100362 | 0                    |
| unclassified(100)     | Otu170944 | 0                     | 0                    | 0                    | 0                   | 0.000110387459984546 |
| Flavobacterium(100)   | Otu170950 | 0                     | 0                    | 0                    | 0                   | 0.000110387459984546 |
| unclassified(100)     | Otu170951 | 0                     | 0                    | 0                    | 0                   | 0.000110387459984546 |
| unclassified(100)     | Otu170955 | 0                     | 0                    | 0                    | 0                   | 0.000110387459984546 |
| Chryseobacterium(100) | Otu170957 | 0                     | 0                    | 0                    | 0                   | 0.000110387459984546 |
| Flavobacterium(100)   | Otu170958 | 0                     | 0                    | 0                    | 0                   | 0.000110387459984546 |
| Chryseobacterium(100) | Otu170960 | 0                     | 0                    | 0                    | 0                   | 0.000110387459984546 |
| Chryseobacterium(100) | Otu170961 | 0                     | 0                    | 0                    | 0                   | 0.000110387459984546 |
| unclassified(100)     | Otu171097 | 0                     | 0                    | 0                    | 0                   | 0.000110387459984546 |
| unclassified(100)     | Otu172223 | 0                     | 0                    | 0                    | 0.00012482836100362 | 0                    |
| unclassified(100)     | Otu172232 | 0                     | 0                    | 0                    | 0.00012482836100362 | 0                    |
| unclassified(100)     | Otu172238 | 0                     | 0                    | 0                    | 0.00012482836100362 | 0                    |
| unclassified(100)     | Otu172366 | 0                     | 0                    | 0                    | 0                   | 0.000110387459984546 |
| unclassified(100)     | Otu172368 | 0                     | 0                    | 0                    | 0.00012482836100362 | 0                    |
| unclassified(100)     | Otu172374 | 0                     | 0.000124968757810547 | 0                    | 0                   | 0                    |
| unclassified(100)     | Otu172376 | 0                     | 0.000124968757810547 | 0                    | 0                   | 0                    |
| unclassified(100)     | Otu172387 | 0                     | 0                    | 0                    | 0                   | 0.000110387459984546 |
| unclassified(100)     | Otu172392 | 0                     | 0                    | 0.000109075043630017 | 0                   | 0                    |
| unclassified(100)     | Otu172398 | 0                     | 0                    | 0                    | 0.00012482836100362 | 0                    |
| unclassified(100)     | Otu172399 | 0                     | 0                    | 0                    | 0.00012482836100362 | 0                    |
| unclassified(100)     | Otu172401 | 0                     | 0                    | 0                    | 0.00012482836100362 | 0                    |
| unclassified(100)     | Otu172434 | 0                     | 0.000124968757810547 | 0                    | 0                   | 0                    |
| unclassified(100)     | Otu173722 | 0.0000778513040093422 | 0                    | 0                    | 0                   | 0                    |
| unclassified(100)     | Otu173725 | 0.0000778513040093422 | 0                    | 0                    | 0                   | 0                    |
| unclassified(100)     | Otu173727 | 0.0000778513040093422 | 0                    | 0                    | 0                   | 0                    |
| unclassified(100)     | Otu173779 | 0                     | 0                    | 0.000109075043630017 | 0                   | 0                    |

|                   |           |                       |                      |                      |                     |                      |
|-------------------|-----------|-----------------------|----------------------|----------------------|---------------------|----------------------|
| unclassified(100) | Otu173781 | 0                     | 0                    | 0.000109075043630017 | 0                   | 0                    |
| unclassified(100) | Otu173782 | 0                     | 0                    | 0.000109075043630017 | 0                   | 0                    |
| unclassified(100) | Otu173783 | 0                     | 0                    | 0.000109075043630017 | 0                   | 0                    |
| unclassified(100) | Otu173787 | 0                     | 0                    | 0.000109075043630017 | 0                   | 0                    |
| unclassified(100) | Otu173788 | 0                     | 0                    | 0.000109075043630017 | 0                   | 0                    |
| unclassified(100) | Otu173789 | 0                     | 0                    | 0.000109075043630017 | 0                   | 0                    |
| unclassified(100) | Otu173796 | 0.0000778513040093422 | 0                    | 0                    | 0                   | 0                    |
| unclassified(100) | Otu173800 | 0.0000778513040093422 | 0                    | 0                    | 0                   | 0                    |
| unclassified(100) | Otu173806 | 0                     | 0.000124968757810547 | 0                    | 0                   | 0                    |
| unclassified(100) | Otu173808 | 0                     | 0.000124968757810547 | 0                    | 0                   | 0                    |
| unclassified(100) | Otu173811 | 0.0000778513040093422 | 0                    | 0                    | 0                   | 0                    |
| unclassified(100) | Otu173828 | 0.0000778513040093422 | 0                    | 0                    | 0                   | 0                    |
| unclassified(100) | Otu173829 | 0.0000778513040093422 | 0                    | 0                    | 0                   | 0                    |
| unclassified(100) | Otu173840 | 0.0000778513040093422 | 0                    | 0                    | 0                   | 0                    |
| unclassified(100) | Otu173894 | 0.0000778513040093422 | 0                    | 0                    | 0                   | 0                    |
| unclassified(100) | Otu173896 | 0.0000778513040093422 | 0                    | 0                    | 0                   | 0                    |
| unclassified(100) | Otu173899 | 0.0000778513040093422 | 0                    | 0                    | 0                   | 0                    |
| unclassified(100) | Otu174098 | 0                     | 0                    | 0                    | 0                   | 0.000110387459984546 |
| unclassified(100) | Otu174099 | 0                     | 0                    | 0                    | 0                   | 0.000110387459984546 |
| unclassified(100) | Otu174100 | 0                     | 0                    | 0                    | 0                   | 0.000110387459984546 |
| unclassified(100) | Otu174104 | 0                     | 0                    | 0.000109075043630017 | 0                   | 0                    |
| unclassified(100) | Otu174106 | 0                     | 0                    | 0.000109075043630017 | 0                   | 0                    |
| unclassified(100) | Otu174108 | 0                     | 0                    | 0                    | 0                   | 0.000110387459984546 |
| unclassified(100) | Otu174109 | 0                     | 0                    | 0                    | 0.00012482836100362 | 0                    |
| unclassified(100) | Otu174110 | 0                     | 0                    | 0.000109075043630017 | 0                   | 0                    |
| unclassified(100) | Otu174111 | 0                     | 0                    | 0                    | 0                   | 0.000110387459984546 |
| unclassified(100) | Otu174114 | 0                     | 0                    | 0                    | 0.00012482836100362 | 0                    |
| unclassified(100) | Otu174119 | 0                     | 0                    | 0                    | 0                   | 0.000110387459984546 |
| unclassified(100) | Otu174142 | 0                     | 0                    | 0.000109075043630017 | 0                   | 0                    |
| unclassified(100) | Otu174143 | 0                     | 0.000124968757810547 | 0                    | 0                   | 0                    |
| unclassified(100) | Otu174147 | 0                     | 0                    | 0.000109075043630017 | 0                   | 0                    |
| unclassified(100) | Otu174154 | 0                     | 0                    | 0.000109075043630017 | 0                   | 0                    |
| unclassified(100) | Otu174155 | 0                     | 0                    | 0.000109075043630017 | 0                   | 0                    |

|                                    |           |                       |                      |                      |                     |                      |
|------------------------------------|-----------|-----------------------|----------------------|----------------------|---------------------|----------------------|
| unclassified(100)                  | Otu174157 | 0                     | 0                    | 0.000109075043630017 | 0                   | 0                    |
| unclassified(100)                  | Otu174161 | 0                     | 0                    | 0                    | 0                   | 0.000110387459984546 |
| unclassified(100)                  | Otu174172 | 0                     | 0                    | 0                    | 0                   | 0.000110387459984546 |
| unclassified(100)                  | Otu174173 | 0                     | 0                    | 0                    | 0                   | 0.000110387459984546 |
| unclassified(100)                  | Otu174174 | 0                     | 0                    | 0                    | 0                   | 0.000110387459984546 |
| unclassified(100)                  | Otu174194 | 0                     | 0                    | 0                    | 0                   | 0.000110387459984546 |
| unclassified(100)                  | Otu174196 | 0                     | 0.000124968757810547 | 0                    | 0                   | 0                    |
| unclassified(100)                  | Otu174201 | 0                     | 0.000124968757810547 | 0                    | 0                   | 0                    |
| unclassified(100)                  | Otu174206 | 0                     | 0                    | 0                    | 0                   | 0.000110387459984546 |
| unclassified(100)                  | Otu174209 | 0                     | 0                    | 0.000109075043630017 | 0                   | 0                    |
| unclassified(100)                  | Otu174211 | 0                     | 0                    | 0                    | 0                   | 0.000110387459984546 |
| unclassified(100)                  | Otu174218 | 0                     | 0                    | 0                    | 0                   | 0.000110387459984546 |
| unclassified(100)                  | Otu174259 | 0.0000778513040093422 | 0                    | 0                    | 0                   | 0                    |
| unclassified(100)                  | Otu174261 | 0.0000778513040093422 | 0                    | 0                    | 0                   | 0                    |
| unclassified(100)                  | Otu174266 | 0.0000778513040093422 | 0                    | 0                    | 0                   | 0                    |
| unclassified(100)                  | Otu174362 | 0                     | 0                    | 0.000109075043630017 | 0                   | 0                    |
| unclassified(100)                  | Otu174368 | 0                     | 0                    | 0.000109075043630017 | 0                   | 0                    |
| unclassified(100)                  | Otu174397 | 0                     | 0                    | 0                    | 0                   | 0.000110387459984546 |
| unclassified(100)                  | Otu174398 | 0                     | 0                    | 0                    | 0                   | 0.000110387459984546 |
| unclassified(100)                  | Otu174399 | 0                     | 0                    | 0                    | 0                   | 0.000110387459984546 |
| unclassified(100)                  | Otu174742 | 0                     | 0                    | 0                    | 0.00012482836100362 | 0                    |
| unclassified(100)                  | Otu174747 | 0                     | 0                    | 0                    | 0.00012482836100362 | 0                    |
| unclassified(100)                  | Otu174748 | 0                     | 0                    | 0                    | 0.00012482836100362 | 0                    |
| unclassified(100)                  | Otu174751 | 0                     | 0                    | 0                    | 0.00012482836100362 | 0                    |
| unclassified(100)                  | Otu174762 | 0                     | 0                    | 0                    | 0                   | 0.000110387459984546 |
| Beta_vulgaris_subsp._vulgaris(100) | Otu174763 | 0                     | 0                    | 0                    | 0                   | 0.000110387459984546 |
| unclassified(100)                  | Otu175839 | 0                     | 0                    | 0.000109075043630017 | 0                   | 0                    |
| Candidatus_Rhabdochlamydia(100)    | Otu175950 | 0                     | 0                    | 0                    | 0                   | 0.000220774919969092 |
| unclassified(100)                  | Otu176005 | 0                     | 0                    | 0                    | 0                   | 0.000331162379953637 |
| unclassified(100)                  | Otu176146 | 0                     | 0                    | 0                    | 0.00012482836100362 | 0                    |
| unclassified(100)                  | Otu176294 | 0                     | 0.000124968757810547 | 0                    | 0                   | 0                    |
| unclassified(100)                  | Otu176370 | 0                     | 0                    | 0                    | 0                   | 0.000110387459984546 |
| Caldanaerobius(100)                | Otu176440 | 0                     | 0                    | 0                    | 0.00012482836100362 | 0                    |

|                           |           |                       |                      |                      |                     |                      |
|---------------------------|-----------|-----------------------|----------------------|----------------------|---------------------|----------------------|
| Truepera(100)             | Otu176441 | 0                     | 0                    | 0                    | 0                   | 0.000331162379953637 |
| unclassified(100)         | Otu176527 | 0                     | 0                    | 0                    | 0.00012482836100362 | 0                    |
| Incertae_Sedis(100)       | Otu176546 | 0                     | 0                    | 0                    | 0                   | 0.000110387459984546 |
| Incertae_Sedis(100)       | Otu176548 | 0                     | 0                    | 0                    | 0                   | 0.000110387459984546 |
| unclassified(100)         | Otu176584 | 0                     | 0                    | 0                    | 0                   | 0.000220774919969092 |
| uncultured_bacterium(100) | Otu176672 | 0                     | 0                    | 0                    | 0.00037448508301086 | 0                    |
| Aureimonas(100)           | Otu176736 | 0                     | 0                    | 0                    | 0                   | 0.000110387459984546 |
| Aureimonas(100)           | Otu176740 | 0                     | 0.000124968757810547 | 0                    | 0                   | 0                    |
| unclassified(100)         | Otu176764 | 0                     | 0                    | 0                    | 0                   | 0.000110387459984546 |
| unclassified(100)         | Otu176819 | 0                     | 0                    | 0.000109075043630017 | 0                   | 0                    |
| unclassified(100)         | Otu176820 | 0                     | 0                    | 0.000109075043630017 | 0                   | 0                    |
| unclassified(100)         | Otu177046 | 0                     | 0                    | 0.000109075043630017 | 0                   | 0                    |
| unclassified(100)         | Otu177125 | 0                     | 0.000124968757810547 | 0                    | 0                   | 0                    |
| unclassified(100)         | Otu177149 | 0.0000778513040093422 | 0                    | 0                    | 0                   | 0                    |
| unclassified(100)         | Otu177152 | 0.0000778513040093422 | 0                    | 0                    | 0                   | 0                    |
| unclassified(100)         | Otu177154 | 0.0000778513040093422 | 0                    | 0                    | 0                   | 0                    |
| Bdellovibrio(100)         | Otu177535 | 0.000233553912028026  | 0                    | 0                    | 0                   | 0                    |
| unclassified(100)         | Otu177615 | 0                     | 0                    | 0                    | 0                   | 0.000110387459984546 |
| unclassified(100)         | Otu177616 | 0                     | 0                    | 0                    | 0                   | 0.000110387459984546 |
| unclassified(100)         | Otu177618 | 0                     | 0                    | 0                    | 0                   | 0.000110387459984546 |
| unclassified(100)         | Otu177646 | 0                     | 0.000124968757810547 | 0                    | 0                   | 0                    |
| unclassified(100)         | Otu177663 | 0                     | 0                    | 0                    | 0.00012482836100362 | 0                    |
| unclassified(100)         | Otu177673 | 0                     | 0                    | 0                    | 0.00012482836100362 | 0                    |
| Nosocomiicoccus(100)      | Otu177852 | 0                     | 0                    | 0                    | 0.00074897016602172 | 0                    |
| Staphylococcus(100)       | Otu178065 | 0                     | 0.000124968757810547 | 0                    | 0                   | 0                    |
| Staphylococcus(100)       | Otu178089 | 0                     | 0.000124968757810547 | 0                    | 0                   | 0                    |
| Staphylococcus(100)       | Otu178094 | 0                     | 0                    | 0                    | 0.00012482836100362 | 0                    |
| Staphylococcus(100)       | Otu178155 | 0                     | 0.000124968757810547 | 0                    | 0                   | 0                    |
| Staphylococcus(100)       | Otu178215 | 0                     | 0                    | 0.000109075043630017 | 0                   | 0                    |
| Staphylococcus(100)       | Otu178261 | 0                     | 0                    | 0                    | 0.00012482836100362 | 0                    |
| unclassified(100)         | Otu178828 | 0                     | 0.000124968757810547 | 0                    | 0                   | 0                    |
| unclassified(100)         | Otu178833 | 0                     | 0.000124968757810547 | 0                    | 0                   | 0                    |
| unclassified(100)         | Otu178888 | 0                     | 0                    | 0                    | 0                   | 0.000110387459984546 |

|                       |           |                       |                      |                      |                     |                      |
|-----------------------|-----------|-----------------------|----------------------|----------------------|---------------------|----------------------|
| Stenotrophomonas(100) | Otu178889 | 0                     | 0                    | 0                    | 0                   | 0.000110387459984546 |
| Stenotrophomonas(100) | Otu178896 | 0                     | 0                    | 0                    | 0.00012482836100362 | 0                    |
| Stenotrophomonas(100) | Otu178897 | 0                     | 0                    | 0                    | 0                   | 0.000110387459984546 |
| unclassified(100)     | Otu178899 | 0                     | 0                    | 0                    | 0                   | 0.000110387459984546 |
| Stenotrophomonas(100) | Otu178900 | 0                     | 0                    | 0                    | 0                   | 0.000110387459984546 |
| Stenotrophomonas(100) | Otu178911 | 0                     | 0                    | 0                    | 0                   | 0.000110387459984546 |
| unclassified(100)     | Otu179028 | 0                     | 0.000124968757810547 | 0                    | 0                   | 0                    |
| unclassified(100)     | Otu179064 | 0                     | 0                    | 0                    | 0.00012482836100362 | 0                    |
| Stenotrophomonas(100) | Otu179149 | 0                     | 0.000124968757810547 | 0                    | 0                   | 0                    |
| Stenotrophomonas(100) | Otu179172 | 0                     | 0.000124968757810547 | 0                    | 0                   | 0                    |
| Stenotrophomonas(100) | Otu179226 | 0.0000778513040093422 | 0                    | 0                    | 0                   | 0                    |
| Stenotrophomonas(100) | Otu179228 | 0                     | 0                    | 0                    | 0                   | 0.000110387459984546 |
| unclassified(100)     | Otu179244 | 0                     | 0                    | 0.000109075043630017 | 0                   | 0                    |
| Rhodanobacter(100)    | Otu179249 | 0                     | 0                    | 0                    | 0                   | 0.000110387459984546 |
| unclassified(100)     | Otu179254 | 0                     | 0                    | 0.000109075043630017 | 0                   | 0                    |
| Stenotrophomonas(100) | Otu179257 | 0                     | 0                    | 0                    | 0                   | 0.000110387459984546 |
| Staphylococcus(100)   | Otu179370 | 0                     | 0                    | 0                    | 0.00012482836100362 | 0                    |
| Staphylococcus(100)   | Otu179375 | 0                     | 0                    | 0                    | 0.00012482836100362 | 0                    |
| Staphylococcus(100)   | Otu179477 | 0                     | 0                    | 0                    | 0.00012482836100362 | 0                    |
| Staphylococcus(100)   | Otu179480 | 0                     | 0                    | 0                    | 0.00012482836100362 | 0                    |
| Staphylococcus(100)   | Otu179493 | 0                     | 0                    | 0.000109075043630017 | 0                   | 0                    |
| Staphylococcus(100)   | Otu179524 | 0                     | 0.000124968757810547 | 0                    | 0                   | 0                    |
| unclassified(100)     | Otu179580 | 0                     | 0                    | 0                    | 0                   | 0.000110387459984546 |
| Staphylococcus(100)   | Otu179725 | 0                     | 0                    | 0                    | 0                   | 0.000110387459984546 |
| Staphylococcus(100)   | Otu179735 | 0                     | 0                    | 0                    | 0                   | 0.000110387459984546 |
| unclassified(100)     | Otu179882 | 0                     | 0                    | 0                    | 0                   | 0.000110387459984546 |
| unclassified(100)     | Otu179883 | 0.0000778513040093422 | 0                    | 0                    | 0                   | 0                    |
| unclassified(100)     | Otu179884 | 0.0000778513040093422 | 0                    | 0                    | 0                   | 0                    |
| unclassified(100)     | Otu179887 | 0.0000778513040093422 | 0                    | 0                    | 0                   | 0                    |
| unclassified(100)     | Otu180008 | 0                     | 0                    | 0.000109075043630017 | 0                   | 0                    |
| unclassified(100)     | Otu180011 | 0.0000778513040093422 | 0                    | 0                    | 0                   | 0                    |
| unclassified(100)     | Otu180012 | 0.0000778513040093422 | 0                    | 0                    | 0                   | 0                    |
| unclassified(100)     | Otu180016 | 0                     | 0.000124968757810547 | 0                    | 0                   | 0                    |

|                   |           |                       |   |                      |                     |                      |
|-------------------|-----------|-----------------------|---|----------------------|---------------------|----------------------|
| unclassified(100) | Otu180018 | 0                     | 0 | 0                    | 0.00012482836100362 | 0                    |
| unclassified(100) | Otu180045 | 0                     | 0 | 0                    | 0                   | 0.000110387459984546 |
| unclassified(100) | Otu180073 | 0                     | 0 | 0                    | 0                   | 0.000110387459984546 |
| unclassified(100) | Otu180080 | 0                     | 0 | 0                    | 0                   | 0.000110387459984546 |
| unclassified(100) | Otu180097 | 0                     | 0 | 0                    | 0                   | 0.000110387459984546 |
| unclassified(100) | Otu180098 | 0                     | 0 | 0                    | 0                   | 0.000110387459984546 |
| unclassified(100) | Otu180099 | 0                     | 0 | 0                    | 0                   | 0.000110387459984546 |
| unclassified(100) | Otu180101 | 0                     | 0 | 0                    | 0                   | 0.000110387459984546 |
| unclassified(100) | Otu180363 | 0.0000778513040093422 | 0 | 0                    | 0                   | 0                    |
| unclassified(100) | Otu180425 | 0.0000778513040093422 | 0 | 0                    | 0                   | 0                    |
| unclassified(100) | Otu180427 | 0.0000778513040093422 | 0 | 0                    | 0                   | 0                    |
| unclassified(100) | Otu180430 | 0.0000778513040093422 | 0 | 0                    | 0                   | 0                    |
| unclassified(100) | Otu180434 | 0.0000778513040093422 | 0 | 0                    | 0                   | 0                    |
| unclassified(100) | Otu180436 | 0.0000778513040093422 | 0 | 0                    | 0                   | 0                    |
| unclassified(100) | Otu180440 | 0.0000778513040093422 | 0 | 0                    | 0                   | 0                    |
| unclassified(100) | Otu180442 | 0.0000778513040093422 | 0 | 0                    | 0                   | 0                    |
| unclassified(100) | Otu180444 | 0.0000778513040093422 | 0 | 0                    | 0                   | 0                    |
| unclassified(100) | Otu180446 | 0.0000778513040093422 | 0 | 0                    | 0                   | 0                    |
| unclassified(100) | Otu180452 | 0.0000778513040093422 | 0 | 0                    | 0                   | 0                    |
| unclassified(100) | Otu180472 | 0.0000778513040093422 | 0 | 0                    | 0                   | 0                    |
| unclassified(100) | Otu180475 | 0.0000778513040093422 | 0 | 0                    | 0                   | 0                    |
| unclassified(100) | Otu180482 | 0.0000778513040093422 | 0 | 0                    | 0                   | 0                    |
| unclassified(100) | Otu180576 | 0                     | 0 | 0                    | 0                   | 0.000110387459984546 |
| unclassified(100) | Otu180614 | 0.0000778513040093422 | 0 | 0                    | 0                   | 0                    |
| unclassified(100) | Otu180616 | 0.0000778513040093422 | 0 | 0                    | 0                   | 0                    |
| unclassified(100) | Otu180622 | 0.0000778513040093422 | 0 | 0                    | 0                   | 0                    |
| unclassified(100) | Otu180626 | 0.0000778513040093422 | 0 | 0                    | 0                   | 0                    |
| unclassified(100) | Otu180629 | 0.0000778513040093422 | 0 | 0                    | 0                   | 0                    |
| unclassified(100) | Otu180639 | 0.0000778513040093422 | 0 | 0                    | 0                   | 0                    |
| unclassified(100) | Otu180644 | 0.0000778513040093422 | 0 | 0                    | 0                   | 0                    |
| unclassified(100) | Otu180648 | 0.0000778513040093422 | 0 | 0                    | 0                   | 0                    |
| unclassified(100) | Otu180657 | 0                     | 0 | 0.000109075043630017 | 0                   | 0                    |
| unclassified(100) | Otu180658 | 0                     | 0 | 0.000109075043630017 | 0                   | 0                    |

|                   |           |                       |                      |                      |                     |   |
|-------------------|-----------|-----------------------|----------------------|----------------------|---------------------|---|
| unclassified(100) | Otu180663 | 0                     | 0                    | 0                    | 0.00012482836100362 | 0 |
| unclassified(100) | Otu180666 | 0.0000778513040093422 | 0                    | 0                    | 0                   | 0 |
| unclassified(100) | Otu180668 | 0.0000778513040093422 | 0                    | 0                    | 0                   | 0 |
| unclassified(100) | Otu180669 | 0.0000778513040093422 | 0                    | 0                    | 0                   | 0 |
| unclassified(100) | Otu180677 | 0                     | 0                    | 0                    | 0.00012482836100362 | 0 |
| unclassified(100) | Otu180678 | 0                     | 0.000124968757810547 | 0                    | 0                   | 0 |
| unclassified(100) | Otu180679 | 0                     | 0.000124968757810547 | 0                    | 0                   | 0 |
| unclassified(100) | Otu180682 | 0.0000778513040093422 | 0                    | 0                    | 0                   | 0 |
| unclassified(100) | Otu180686 | 0                     | 0.000124968757810547 | 0                    | 0                   | 0 |
| unclassified(100) | Otu180689 | 0                     | 0.000124968757810547 | 0                    | 0                   | 0 |
| unclassified(100) | Otu180690 | 0                     | 0.000124968757810547 | 0                    | 0                   | 0 |
| unclassified(100) | Otu180696 | 0                     | 0                    | 0                    | 0.00012482836100362 | 0 |
| unclassified(100) | Otu180697 | 0                     | 0                    | 0                    | 0.00012482836100362 | 0 |
| unclassified(100) | Otu180698 | 0                     | 0                    | 0                    | 0.00012482836100362 | 0 |
| unclassified(100) | Otu180704 | 0                     | 0                    | 0.000109075043630017 | 0                   | 0 |
| unclassified(100) | Otu180710 | 0.0000778513040093422 | 0                    | 0                    | 0                   | 0 |
| unclassified(100) | Otu180714 | 0.0000778513040093422 | 0                    | 0                    | 0                   | 0 |
| unclassified(100) | Otu180716 | 0                     | 0.000124968757810547 | 0                    | 0                   | 0 |
| unclassified(100) | Otu180722 | 0                     | 0                    | 0.000109075043630017 | 0                   | 0 |
| unclassified(100) | Otu180723 | 0.0000778513040093422 | 0                    | 0                    | 0                   | 0 |
| unclassified(100) | Otu180742 | 0.0000778513040093422 | 0                    | 0                    | 0                   | 0 |
| unclassified(100) | Otu180779 | 0.0000778513040093422 | 0                    | 0                    | 0                   | 0 |
| unclassified(100) | Otu180785 | 0.0000778513040093422 | 0                    | 0                    | 0                   | 0 |
| unclassified(100) | Otu180786 | 0.0000778513040093422 | 0                    | 0                    | 0                   | 0 |
| unclassified(100) | Otu180787 | 0.0000778513040093422 | 0                    | 0                    | 0                   | 0 |
| unclassified(100) | Otu180788 | 0.0000778513040093422 | 0                    | 0                    | 0                   | 0 |
| unclassified(100) | Otu180791 | 0.0000778513040093422 | 0                    | 0                    | 0                   | 0 |
| unclassified(100) | Otu180792 | 0.0000778513040093422 | 0                    | 0                    | 0                   | 0 |
| unclassified(100) | Otu180793 | 0.0000778513040093422 | 0                    | 0                    | 0                   | 0 |
| unclassified(100) | Otu180798 | 0.0000778513040093422 | 0                    | 0                    | 0                   | 0 |
| unclassified(100) | Otu180801 | 0.0000778513040093422 | 0                    | 0                    | 0                   | 0 |
| unclassified(100) | Otu180802 | 0.0000778513040093422 | 0                    | 0                    | 0                   | 0 |
| unclassified(100) | Otu180804 | 0.0000778513040093422 | 0                    | 0                    | 0                   | 0 |



|                   |           |                       |                      |   |   |                      |
|-------------------|-----------|-----------------------|----------------------|---|---|----------------------|
| unclassified(100) | Otu180806 | 0.0000778513040093422 | 0                    | 0 | 0 | 0                    |
| unclassified(100) | Otu180821 | 0.0000778513040093422 | 0                    | 0 | 0 | 0                    |
| unclassified(100) | Otu180826 | 0.0000778513040093422 | 0                    | 0 | 0 | 0                    |
| unclassified(100) | Otu180849 | 0.0000778513040093422 | 0                    | 0 | 0 | 0                    |
| unclassified(100) | Otu180859 | 0.0000778513040093422 | 0                    | 0 | 0 | 0                    |
| unclassified(100) | Otu181571 | 0.0000778513040093422 | 0                    | 0 | 0 | 0                    |
| unclassified(100) | Otu181578 | 0.0000778513040093422 | 0                    | 0 | 0 | 0                    |
| unclassified(100) | Otu181584 | 0.0000778513040093422 | 0                    | 0 | 0 | 0                    |
| unclassified(100) | Otu181593 | 0.0000778513040093422 | 0                    | 0 | 0 | 0                    |
| unclassified(100) | Otu181594 | 0.0000778513040093422 | 0                    | 0 | 0 | 0                    |
| unclassified(100) | Otu181596 | 0.0000778513040093422 | 0                    | 0 | 0 | 0                    |
| unclassified(100) | Otu181597 | 0.0000778513040093422 | 0                    | 0 | 0 | 0                    |
| unclassified(100) | Otu181621 | 0.0000778513040093422 | 0                    | 0 | 0 | 0                    |
| unclassified(100) | Otu181624 | 0.0000778513040093422 | 0                    | 0 | 0 | 0                    |
| Wolbachia(100)    | Otu182995 | 0.0000778513040093422 | 0                    | 0 | 0 | 0                    |
| Wolbachia(100)    | Otu182999 | 0.0000778513040093422 | 0                    | 0 | 0 | 0                    |
| Wolbachia(100)    | Otu183000 | 0                     | 0.000124968757810547 | 0 | 0 | 0                    |
| Wolbachia(100)    | Otu183004 | 0.0000778513040093422 | 0                    | 0 | 0 | 0                    |
| Wolbachia(100)    | Otu183151 | 0.0000778513040093422 | 0                    | 0 | 0 | 0                    |
| Wolbachia(100)    | Otu183200 | 0                     | 0                    | 0 | 0 | 0.000110387459984546 |
| Wolbachia(100)    | Otu183209 | 0                     | 0                    | 0 | 0 | 0.000110387459984546 |
| Wolbachia(100)    | Otu183210 | 0                     | 0                    | 0 | 0 | 0.000110387459984546 |
| Wolbachia(100)    | Otu183214 | 0                     | 0                    | 0 | 0 | 0.000220774919969092 |
| Wolbachia(100)    | Otu183217 | 0                     | 0                    | 0 | 0 | 0.000110387459984546 |
| Wolbachia(100)    | Otu183219 | 0                     | 0                    | 0 | 0 | 0.000110387459984546 |
| Wolbachia(100)    | Otu183222 | 0                     | 0                    | 0 | 0 | 0.000110387459984546 |
| Wolbachia(100)    | Otu183279 | 0                     | 0                    | 0 | 0 | 0.000110387459984546 |
| Wolbachia(100)    | Otu183298 | 0                     | 0.000124968757810547 | 0 | 0 | 0                    |
| Wolbachia(100)    | Otu183303 | 0                     | 0.000124968757810547 | 0 | 0 | 0                    |
| Wolbachia(100)    | Otu183308 | 0                     | 0.000124968757810547 | 0 | 0 | 0                    |
| Wolbachia(100)    | Otu183310 | 0                     | 0.000124968757810547 | 0 | 0 | 0                    |
| Wolbachia(100)    | Otu183311 | 0                     | 0.000124968757810547 | 0 | 0 | 0                    |
| Wolbachia(100)    | Otu183326 | 0                     | 0.000124968757810547 | 0 | 0 | 0                    |

|                       |           |                       |                      |                      |                     |                      |
|-----------------------|-----------|-----------------------|----------------------|----------------------|---------------------|----------------------|
| Wolbachia(100)        | Otu183328 | 0.0000778513040093422 | 0                    | 0                    | 0                   | 0                    |
| Wolbachia(100)        | Otu183343 | 0                     | 0.000124968757810547 | 0                    | 0                   | 0                    |
| Wolbachia(100)        | Otu183348 | 0                     | 0.000124968757810547 | 0                    | 0                   | 0                    |
| Wolbachia(100)        | Otu183351 | 0                     | 0.000124968757810547 | 0                    | 0                   | 0                    |
| Wolbachia(100)        | Otu183352 | 0                     | 0.000124968757810547 | 0                    | 0                   | 0                    |
| Wolbachia(100)        | Otu183361 | 0                     | 0                    | 0.000109075043630017 | 0                   | 0                    |
| Wolbachia(100)        | Otu183365 | 0                     | 0                    | 0                    | 0.00012482836100362 | 0                    |
| Wolbachia(100)        | Otu183366 | 0                     | 0                    | 0                    | 0.00012482836100362 | 0                    |
| Wolbachia(100)        | Otu183374 | 0                     | 0                    | 0                    | 0.00012482836100362 | 0                    |
| Wolbachia(100)        | Otu183375 | 0                     | 0                    | 0                    | 0.00012482836100362 | 0                    |
| Wolbachia(100)        | Otu183376 | 0                     | 0                    | 0                    | 0.00012482836100362 | 0                    |
| Wolbachia(100)        | Otu183381 | 0                     | 0                    | 0                    | 0.00012482836100362 | 0                    |
| Wolbachia(100)        | Otu183384 | 0                     | 0                    | 0                    | 0.00012482836100362 | 0                    |
| Wolbachia(100)        | Otu183388 | 0                     | 0                    | 0                    | 0.00012482836100362 | 0                    |
| Wolbachia(100)        | Otu183389 | 0                     | 0                    | 0                    | 0                   | 0.000110387459984546 |
| Wolbachia(100)        | Otu183393 | 0                     | 0                    | 0.000109075043630017 | 0                   | 0                    |
| Wolbachia(100)        | Otu183394 | 0                     | 0                    | 0.000109075043630017 | 0                   | 0                    |
| Wolbachia(100)        | Otu183399 | 0                     | 0                    | 0.000109075043630017 | 0                   | 0                    |
| Wolbachia(100)        | Otu183402 | 0                     | 0                    | 0.000109075043630017 | 0                   | 0                    |
| Wolbachia(100)        | Otu183403 | 0                     | 0                    | 0.000109075043630017 | 0                   | 0                    |
| Wolbachia(100)        | Otu183404 | 0                     | 0                    | 0.000109075043630017 | 0                   | 0                    |
| Wolbachia(100)        | Otu183408 | 0                     | 0                    | 0.000109075043630017 | 0                   | 0                    |
| Wolbachia(100)        | Otu183412 | 0                     | 0                    | 0.000109075043630017 | 0                   | 0                    |
| Wolbachia(100)        | Otu183413 | 0                     | 0                    | 0.000109075043630017 | 0                   | 0                    |
| Wolbachia(100)        | Otu183414 | 0                     | 0                    | 0.000109075043630017 | 0                   | 0                    |
| Wolbachia(100)        | Otu183417 | 0                     | 0                    | 0.000109075043630017 | 0                   | 0                    |
| Wolbachia(100)        | Otu183418 | 0                     | 0                    | 0.000109075043630017 | 0                   | 0                    |
| Wolbachia(100)        | Otu185557 | 0                     | 0.000124968757810547 | 0                    | 0                   | 0                    |
| Wolbachia(100)        | Otu185793 | 0                     | 0.000124968757810547 | 0                    | 0                   | 0                    |
| Wolbachia(100)        | Otu185903 | 0                     | 0                    | 0.000109075043630017 | 0                   | 0                    |
| Chryseobacterium(100) | Otu191170 | 0                     | 0.000124968757810547 | 0                    | 0                   | 0                    |
| unclassified(100)     | Otu191214 | 0                     | 0                    | 0.000109075043630017 | 0                   | 0                    |
| Chryseobacterium(100) | Otu191231 | 0                     | 0                    | 0.000109075043630017 | 0                   | 0                    |

|                       |           |   |                      |                      |                     |   |
|-----------------------|-----------|---|----------------------|----------------------|---------------------|---|
| Flavobacterium(100)   | Otu191234 | 0 | 0                    | 0.000109075043630017 | 0                   | 0 |
| Chryseobacterium(100) | Otu191237 | 0 | 0                    | 0.000109075043630017 | 0                   | 0 |
| Chryseobacterium(100) | Otu191241 | 0 | 0                    | 0.000109075043630017 | 0                   | 0 |
| unclassified(100)     | Otu191262 | 0 | 0                    | 0.000109075043630017 | 0                   | 0 |
| Flavobacterium(100)   | Otu191319 | 0 | 0                    | 0.000109075043630017 | 0                   | 0 |
| unclassified(100)     | Otu191321 | 0 | 0                    | 0.000109075043630017 | 0                   | 0 |
| unclassified(100)     | Otu191425 | 0 | 0.000124968757810547 | 0                    | 0                   | 0 |
| Chryseobacterium(100) | Otu191436 | 0 | 0.000124968757810547 | 0                    | 0                   | 0 |
| Chryseobacterium(100) | Otu191461 | 0 | 0.000124968757810547 | 0                    | 0                   | 0 |
| Chryseobacterium(100) | Otu191463 | 0 | 0.000124968757810547 | 0                    | 0                   | 0 |
| Flavobacterium(100)   | Otu191468 | 0 | 0.000124968757810547 | 0                    | 0                   | 0 |
| Flavobacterium(100)   | Otu191481 | 0 | 0.000124968757810547 | 0                    | 0                   | 0 |
| unclassified(100)     | Otu191484 | 0 | 0.000124968757810547 | 0                    | 0                   | 0 |
| Chryseobacterium(100) | Otu191507 | 0 | 0.000124968757810547 | 0                    | 0                   | 0 |
| Chryseobacterium(100) | Otu191598 | 0 | 0                    | 0.000109075043630017 | 0                   | 0 |
| Flavobacterium(100)   | Otu191599 | 0 | 0                    | 0.000109075043630017 | 0                   | 0 |
| Chryseobacterium(100) | Otu191600 | 0 | 0                    | 0.000109075043630017 | 0                   | 0 |
| Flavobacterium(100)   | Otu191601 | 0 | 0                    | 0.000109075043630017 | 0                   | 0 |
| Chryseobacterium(100) | Otu191616 | 0 | 0                    | 0.000109075043630017 | 0                   | 0 |
| Chryseobacterium(100) | Otu191622 | 0 | 0                    | 0.000109075043630017 | 0                   | 0 |
| unclassified(100)     | Otu191623 | 0 | 0                    | 0.000109075043630017 | 0                   | 0 |
| Flavobacterium(100)   | Otu191625 | 0 | 0                    | 0.000109075043630017 | 0                   | 0 |
| unclassified(100)     | Otu191626 | 0 | 0                    | 0.000109075043630017 | 0                   | 0 |
| Chryseobacterium(100) | Otu191631 | 0 | 0                    | 0.000109075043630017 | 0                   | 0 |
| Chryseobacterium(100) | Otu191636 | 0 | 0                    | 0.000109075043630017 | 0                   | 0 |
| Chryseobacterium(100) | Otu191644 | 0 | 0                    | 0                    | 0.00012482836100362 | 0 |
| unclassified(100)     | Otu191645 | 0 | 0                    | 0.000109075043630017 | 0                   | 0 |
| Chryseobacterium(100) | Otu191646 | 0 | 0                    | 0                    | 0.00012482836100362 | 0 |
| Chryseobacterium(100) | Otu191652 | 0 | 0                    | 0.000109075043630017 | 0                   | 0 |
| Chryseobacterium(100) | Otu191655 | 0 | 0                    | 0.000109075043630017 | 0                   | 0 |
| unclassified(100)     | Otu191657 | 0 | 0                    | 0.000109075043630017 | 0                   | 0 |
| Chryseobacterium(100) | Otu191661 | 0 | 0                    | 0                    | 0.00012482836100362 | 0 |
| Flavobacterium(100)   | Otu191665 | 0 | 0                    | 0                    | 0.00012482836100362 | 0 |

|                       |           |   |   |                      |                     |   |
|-----------------------|-----------|---|---|----------------------|---------------------|---|
| Chryseobacterium(100) | Otu191668 | 0 | 0 | 0                    | 0.00012482836100362 | 0 |
| unclassified(100)     | Otu191669 | 0 | 0 | 0                    | 0.00012482836100362 | 0 |
| Chryseobacterium(100) | Otu191674 | 0 | 0 | 0                    | 0.00012482836100362 | 0 |
| unclassified(100)     | Otu191675 | 0 | 0 | 0                    | 0.00012482836100362 | 0 |
| Chryseobacterium(100) | Otu191685 | 0 | 0 | 0                    | 0.00012482836100362 | 0 |
| Flavobacterium(100)   | Otu191688 | 0 | 0 | 0                    | 0.00012482836100362 | 0 |
| Chryseobacterium(100) | Otu191695 | 0 | 0 | 0.000109075043630017 | 0                   | 0 |
| Chryseobacterium(100) | Otu191696 | 0 | 0 | 0.000109075043630017 | 0                   | 0 |
| Flavobacterium(100)   | Otu191699 | 0 | 0 | 0.000109075043630017 | 0                   | 0 |
| Flavobacterium(100)   | Otu191700 | 0 | 0 | 0.000109075043630017 | 0                   | 0 |
| Flavobacterium(100)   | Otu191706 | 0 | 0 | 0.000109075043630017 | 0                   | 0 |
| Chryseobacterium(100) | Otu191707 | 0 | 0 | 0.000109075043630017 | 0                   | 0 |
| Chryseobacterium(100) | Otu191713 | 0 | 0 | 0                    | 0.00012482836100362 | 0 |
| Chryseobacterium(100) | Otu191720 | 0 | 0 | 0                    | 0.00012482836100362 | 0 |
| Flavobacterium(100)   | Otu191799 | 0 | 0 | 0                    | 0.00012482836100362 | 0 |
| Bergeyella(100)       | Otu191802 | 0 | 0 | 0                    | 0.00012482836100362 | 0 |
| Chryseobacterium(100) | Otu191804 | 0 | 0 | 0                    | 0.00012482836100362 | 0 |
| Chryseobacterium(100) | Otu191807 | 0 | 0 | 0.000109075043630017 | 0                   | 0 |
| Flavobacterium(100)   | Otu191810 | 0 | 0 | 0.000109075043630017 | 0                   | 0 |
| Flavobacterium(100)   | Otu191811 | 0 | 0 | 0.000109075043630017 | 0                   | 0 |
| Chryseobacterium(100) | Otu191816 | 0 | 0 | 0.000109075043630017 | 0                   | 0 |
| Chryseobacterium(100) | Otu191818 | 0 | 0 | 0.000109075043630017 | 0                   | 0 |
| Flavobacterium(100)   | Otu191819 | 0 | 0 | 0.000109075043630017 | 0                   | 0 |
| Chryseobacterium(100) | Otu191825 | 0 | 0 | 0.000109075043630017 | 0                   | 0 |
| Cloacibacterium(100)  | Otu191829 | 0 | 0 | 0.000109075043630017 | 0                   | 0 |
| Chryseobacterium(100) | Otu191830 | 0 | 0 | 0.000109075043630017 | 0                   | 0 |
| Chryseobacterium(100) | Otu191832 | 0 | 0 | 0.000109075043630017 | 0                   | 0 |
| Flavobacterium(100)   | Otu191997 | 0 | 0 | 0                    | 0.00012482836100362 | 0 |
| Chryseobacterium(100) | Otu192006 | 0 | 0 | 0                    | 0.00012482836100362 | 0 |
| Chryseobacterium(100) | Otu192007 | 0 | 0 | 0                    | 0.00012482836100362 | 0 |
| Chryseobacterium(100) | Otu192012 | 0 | 0 | 0                    | 0.00012482836100362 | 0 |
| Flavobacterium(100)   | Otu192026 | 0 | 0 | 0                    | 0.00012482836100362 | 0 |
| unclassified(100)     | Otu192030 | 0 | 0 | 0                    | 0.00012482836100362 | 0 |

|                       |           |                       |                      |   |                     |                      |
|-----------------------|-----------|-----------------------|----------------------|---|---------------------|----------------------|
| Chryseobacterium(100) | Otu192035 | 0                     | 0                    | 0 | 0.00012482836100362 | 0                    |
| Chryseobacterium(100) | Otu192053 | 0                     | 0                    | 0 | 0.00012482836100362 | 0                    |
| Chryseobacterium(100) | Otu192054 | 0                     | 0                    | 0 | 0.00012482836100362 | 0                    |
| Flavobacterium(100)   | Otu192090 | 0                     | 0                    | 0 | 0.00012482836100362 | 0                    |
| Flavobacterium(100)   | Otu192092 | 0                     | 0                    | 0 | 0.00012482836100362 | 0                    |
| Chryseobacterium(100) | Otu192096 | 0                     | 0                    | 0 | 0.00012482836100362 | 0                    |
| Chryseobacterium(100) | Otu192099 | 0                     | 0                    | 0 | 0.00012482836100362 | 0                    |
| Flavobacterium(100)   | Otu192728 | 0                     | 0.000124968757810547 | 0 | 0                   | 0                    |
| Flavobacterium(100)   | Otu192770 | 0                     | 0.000124968757810547 | 0 | 0                   | 0                    |
| Chryseobacterium(100) | Otu192776 | 0                     | 0.000124968757810547 | 0 | 0                   | 0                    |
| Chryseobacterium(100) | Otu192837 | 0                     | 0.000124968757810547 | 0 | 0                   | 0                    |
| Chryseobacterium(100) | Otu192842 | 0                     | 0.000124968757810547 | 0 | 0                   | 0                    |
| unclassified(100)     | Otu192844 | 0                     | 0.000124968757810547 | 0 | 0                   | 0                    |
| unclassified(100)     | Otu192845 | 0                     | 0.000124968757810547 | 0 | 0                   | 0                    |
| Chryseobacterium(100) | Otu192846 | 0                     | 0.000124968757810547 | 0 | 0                   | 0                    |
| Chryseobacterium(100) | Otu192853 | 0                     | 0.000124968757810547 | 0 | 0                   | 0                    |
| unclassified(100)     | Otu192865 | 0                     | 0.000124968757810547 | 0 | 0                   | 0                    |
| unclassified(100)     | Otu193071 | 0                     | 0.000124968757810547 | 0 | 0                   | 0                    |
| Chryseobacterium(100) | Otu193106 | 0.0000778513040093422 | 0                    | 0 | 0                   | 0                    |
| Chryseobacterium(100) | Otu193116 | 0.0000778513040093422 | 0                    | 0 | 0                   | 0                    |
| Chryseobacterium(100) | Otu193123 | 0                     | 0.000124968757810547 | 0 | 0                   | 0                    |
| Chryseobacterium(100) | Otu193262 | 0                     | 0                    | 0 | 0                   | 0.000110387459984546 |
| Flavobacterium(100)   | Otu193267 | 0                     | 0                    | 0 | 0                   | 0.000110387459984546 |
| Chryseobacterium(100) | Otu193269 | 0                     | 0                    | 0 | 0                   | 0.000110387459984546 |
| Flavobacterium(100)   | Otu193275 | 0                     | 0                    | 0 | 0                   | 0.000110387459984546 |
| Flavobacterium(100)   | Otu193277 | 0                     | 0                    | 0 | 0                   | 0.000110387459984546 |
| Flavobacterium(100)   | Otu193290 | 0                     | 0                    | 0 | 0.00012482836100362 | 0                    |
| Chryseobacterium(100) | Otu193313 | 0                     | 0                    | 0 | 0.00012482836100362 | 0                    |
| unclassified(100)     | Otu193935 | 0                     | 0                    | 0 | 0                   | 0.000110387459984546 |
| Chryseobacterium(100) | Otu193971 | 0                     | 0                    | 0 | 0.00012482836100362 | 0                    |
| unclassified(100)     | Otu193981 | 0                     | 0                    | 0 | 0.00012482836100362 | 0                    |
| Flavobacterium(100)   | Otu194027 | 0                     | 0                    | 0 | 0                   | 0.000110387459984546 |
| unclassified(100)     | Otu194029 | 0                     | 0                    | 0 | 0                   | 0.000110387459984546 |

|                       |           |   |                      |   |   |                      |
|-----------------------|-----------|---|----------------------|---|---|----------------------|
| Chryseobacterium(100) | Otu194030 | 0 | 0                    | 0 | 0 | 0.000110387459984546 |
| unclassified(100)     | Otu194033 | 0 | 0                    | 0 | 0 | 0.000110387459984546 |
| Flavobacterium(100)   | Otu194035 | 0 | 0                    | 0 | 0 | 0.000110387459984546 |
| Chryseobacterium(100) | Otu194040 | 0 | 0                    | 0 | 0 | 0.000110387459984546 |
| Chryseobacterium(100) | Otu194055 | 0 | 0                    | 0 | 0 | 0.000110387459984546 |
| Chryseobacterium(100) | Otu194061 | 0 | 0                    | 0 | 0 | 0.000110387459984546 |
| Flavobacterium(100)   | Otu194066 | 0 | 0                    | 0 | 0 | 0.000110387459984546 |
| Chryseobacterium(100) | Otu194070 | 0 | 0                    | 0 | 0 | 0.000110387459984546 |
| Chryseobacterium(100) | Otu194071 | 0 | 0                    | 0 | 0 | 0.000110387459984546 |
| unclassified(100)     | Otu194113 | 0 | 0                    | 0 | 0 | 0.000110387459984546 |
| Chryseobacterium(100) | Otu194119 | 0 | 0                    | 0 | 0 | 0.000110387459984546 |
| Chryseobacterium(100) | Otu194128 | 0 | 0                    | 0 | 0 | 0.000110387459984546 |
| Chryseobacterium(100) | Otu194130 | 0 | 0                    | 0 | 0 | 0.000110387459984546 |
| Flavobacterium(100)   | Otu194134 | 0 | 0                    | 0 | 0 | 0.000110387459984546 |
| unclassified(100)     | Otu194135 | 0 | 0                    | 0 | 0 | 0.000110387459984546 |
| Flavobacterium(100)   | Otu196713 | 0 | 0.000124968757810547 | 0 | 0 | 0                    |
| Chryseobacterium(100) | Otu196715 | 0 | 0.000124968757810547 | 0 | 0 | 0                    |
| Flavobacterium(100)   | Otu196719 | 0 | 0.000124968757810547 | 0 | 0 | 0                    |
| Chryseobacterium(100) | Otu196732 | 0 | 0.000124968757810547 | 0 | 0 | 0                    |
| Bergeyella(100)       | Otu196738 | 0 | 0.000124968757810547 | 0 | 0 | 0                    |
| Chryseobacterium(100) | Otu196762 | 0 | 0.000124968757810547 | 0 | 0 | 0                    |
| unclassified(100)     | Otu196773 | 0 | 0.000124968757810547 | 0 | 0 | 0                    |
| Bergeyella(100)       | Otu196777 | 0 | 0.000124968757810547 | 0 | 0 | 0                    |
| Myroides(100)         | Otu196778 | 0 | 0.000124968757810547 | 0 | 0 | 0                    |
| Chryseobacterium(100) | Otu196780 | 0 | 0.000124968757810547 | 0 | 0 | 0                    |
| unclassified(100)     | Otu196795 | 0 | 0.000124968757810547 | 0 | 0 | 0                    |
| Chryseobacterium(100) | Otu196810 | 0 | 0.000124968757810547 | 0 | 0 | 0                    |
| Chryseobacterium(100) | Otu196812 | 0 | 0.000124968757810547 | 0 | 0 | 0                    |
| Chryseobacterium(100) | Otu196825 | 0 | 0.000124968757810547 | 0 | 0 | 0                    |
| Chryseobacterium(100) | Otu196855 | 0 | 0.000124968757810547 | 0 | 0 | 0                    |
| Chryseobacterium(100) | Otu196867 | 0 | 0.000124968757810547 | 0 | 0 | 0                    |
| Chryseobacterium(100) | Otu196873 | 0 | 0.000124968757810547 | 0 | 0 | 0                    |
| Flavobacterium(100)   | Otu196878 | 0 | 0.000124968757810547 | 0 | 0 | 0                    |

|                       |           |   |                      |   |   |   |
|-----------------------|-----------|---|----------------------|---|---|---|
| Flavobacterium(100)   | Otu196884 | 0 | 0.000124968757810547 | 0 | 0 | 0 |
| Chryseobacterium(100) | Otu196900 | 0 | 0.000124968757810547 | 0 | 0 | 0 |
| unclassified(100)     | Otu196916 | 0 | 0.000124968757810547 | 0 | 0 | 0 |
| Chryseobacterium(100) | Otu196920 | 0 | 0.000124968757810547 | 0 | 0 | 0 |
| unclassified(100)     | Otu196921 | 0 | 0.000124968757810547 | 0 | 0 | 0 |
| unclassified(100)     | Otu196923 | 0 | 0.000124968757810547 | 0 | 0 | 0 |
| Chryseobacterium(100) | Otu196938 | 0 | 0.000124968757810547 | 0 | 0 | 0 |
| Chryseobacterium(100) | Otu196941 | 0 | 0.000124968757810547 | 0 | 0 | 0 |

---
